# Supplementary material for: Quantitative Phosphoproteomics Analysis of ERBB3/ERBB4 Signaling
Source: PLoS One. 2016 Jan 8;11(1):e0146100. doi: 10.1371/journal.pone.0146100 (PMC4706443; doi:10.1371/journal.pone.0146100)
Supplement: S1 Table — Phosphorylation sites are listed together with phosphopeptide identification and phosphosite localization data, along with treatment ratios in replicate experiments and the q values determined by the Global Mean Rank test. Statistically significant changes are indicated by q values of less than 0.05. (XLSX) [file pone.0146100.s004.xlsx]

## Sheet: S1 Table
id	Proteins	Positions within proteins	Amino Acid	Leading protein(s)	Site	Protein names	Gene names	Sequence window	Phospho (STY) probabilities	Phospho (STY) score diffs	Position in peptide	PEP	Score	Charge	m/z	Mass error [ppm]	Class I site	Ratio M/L normalized replicate 1 ERBB3/ERBB4 ± NRG1	Ratio H/M normalized replicate 2 ERBB3/ERBB4 ± NRG1	Ratio L/H normalized replicate 3 ERBB3/ERBB4 ± NRG1	No. replicate ratios	Mean ratio ERBB3/ERBB4 ± NRG1	STD ratio ERBB3/ERBB4 ± NRG1	Mean Rank q value ratio ERBB3/ERBB4 ± NRG1	Ratio M/H normalized replicate 1 ERBB3/4+NRG1 vs. ERBB4+NRG1	Ratio H/L normalized replicate 2 ERBB3/4+NRG1 vs. ERBB4+NRG1	Ratio L/M normalized replicate 3 ERBB3/4+NRG1 vs. ERBB4+NRG1	No. replicate ratios	Mean ratio ERBB3/4+NRG1 vs. ERBB4+NRG1	STD ratio ERBB3/4+NRG1 vs. ERBB4+NRG1	Mean Rank q value ratio ERBB3/4+NRG1 vs. ERBB4+NRG1
14647	sp|P21860|ERBB3_HUMAN	1328	Y	sp|P21860|ERBB3_HUMAN	Y1328			LRSLEATDSAFDNPDYWHSRLFPKANAQRT_	SLEATDSAFDNPDY(1)WHSRLFPK	S(-111.33)LEAT(-101.63)DS(-96.84)AFDNPDY(47.13)WHS(-47.13)RLFPK	14	7.68323e-30	149.74	4	669.8	0.54165	+	1.01368	0.883525	0.780756	3	0.892654	0.11673	0.00329304	1.38021	0.947635	1.23602	3	1.18795	0.220256	0.000478587
11442	sp|P21860|ERBB3_HUMAN	1147	S	sp|P21860|ERBB3_HUMAN	S1147			YHSQRHSLLTPVTPLSPPGLEEEDVNGYVMP	HSLLTPVT(0.002)PLS(0.998)PPGLEEEDVNGYVMPDTHLK	HS(-57.65)LLT(-46.14)PVT(-27.58)PLS(27.58)PPGLEEEDVNGY(-41.29)VMPDT(-66.19)HLK	11	1.46081e-33	87.92	4	867.172	-0.073841	+	0.393645	0.474464	0.378024	3	0.415378	0.0517627	0.0444928	0.957976	1.25018	0.989615	3	1.06592	0.16035	0.000478587
11445	sp|P21860|ERBB3_HUMAN	686	S	sp|P21860|ERBB3_HUMAN	S686			IQNKRAMRRYLERGESIEPLDPSEKANKVLA	YLERGES(1)IEPLDPSEK	Y(-54.59)LERGES(54.59)IEPLDPS(-100.63)EK	7	3.51473e-06	133.94	3	647.966	-0.40291	+	-0.0862338	-0.0879428	-0.0478587	3	-0.0740118	0.0226653	0.409576	1.12695	1.24932	0.566806	3	0.981027	0.363906	0.000980272
6798	Q61233;D3YZ25;D3YVW8;D3Z7D9;D3Z311	5;5;5;5;5	S	Q61233	S5	Plastin-2	Lcp1	___________MARGSVSDEEMMELREAFAK	ARGS(1)VSDEEMMELREAFAK	ARGS(37.87)VS(-37.87)DEEMMELREAFAK	4	1.79715e-71	237.39	3	760.001	0.024383	+	-0.224098	0.0964929	0.712176	3	0.194857	0.475825	0.913533	0.827601	0.817202	0.617065	3	0.753956	0.118665	0.00150525
7779	Q7TPV4	6	S	Q7TPV4	S6	Myb-binding protein 1A	Mybbp1a	__________MAEMKSPTKAEPATPAEAAQS	AEMKS(0.999)PT(0.001)K	AEMKS(29.34)PT(-29.34)K	5	0.000266615	128.88	2	507.222	-0.033348	+	0.122314	1.92629		2	1.0243	1.2756	0.111245	0.495312	0.859451		2	0.677381	0.257485	0.00563493
13141	Q5F2F2	142	T	Q5F2F2	T142	Abhydrolase domain-containing protein 15	Abhd15	ALDWVIGPCARGRRVTNPGSLPPVLLVIPNA	RVT(0.999)NPGS(0.001)LPPVLLVIPNAWGR	RVT(28.83)NPGS(-28.83)LPPVLLVIPNAWGR	3	2.88907e-42	164.97	3	779.426	-0.30152	+	1.06703	0.535977	1.06417	3	0.88906	0.305782	0.0068142	0.421716	0.388563	0.404294	3	0.404858	0.0165838	0.0265973
9936	Q923F1	3	S	Q923F1	S3		Clns1a	_____________MLSPAMSFLKSFPPPGSA	MLS(1)PAMSFLK	MLS(55.2)PAMS(-55.2)FLK	3	0.00100534	117.95	2	639.779	0.0044931	+	0.811689	0.138524	1.06821	3	0.672806	0.48015	0.0677251		0.317102	0.464909	2	0.391005	0.104515	0.0265973
4385	P08775	1138	S	P08775	S1138	DNA-directed RNA polymerase II subunit RPB1	Polr2a	RLKELINISKKPKTPSLTVFLLGQSARDAER	T(0.001)PS(0.999)LTVFLLGQSAR	T(-31.79)PS(31.79)LT(-33.33)VFLLGQS(-84.1)AR	3	0.0110621	106.93	2	785.405	0.25955	+	0.720664	0.829246		2	0.774955	0.0767792	0.00474248	0.398309	0.465323		2	0.431816	0.0473861	0.029037
7556	Q6PGL7;Q6PGL7-2	832;832	S	Q6PGL7	S832	WASH complex subunit FAM21	Fam21	QDGREKGLKTDSRPKSTGVFQDEELLFSHKL	S(0.978)T(0.022)GVFQDEELLFSHK	S(16.56)T(-16.56)GVFQDEELLFS(-161.98)HK	1	2.15571e-155	216.9	3	606.277	1.4859	+	1.08189	1.0445	1.11816	3	1.08152	0.0368335	0.000720829	0.34912	0.315928	0.466571	3	0.377206	0.0791515	0.0392212
232	A2ADY9	194	S	A2ADY9	S194	Protein DDI1 homolog 2	Ddi2	QQDRARREQERIRLFSADPFDLEAQAKIEED	IRLFS(1)ADPFDLEAQAK	IRLFS(74.51)ADPFDLEAQAK	5	1.74529e-05	135.61	3	634.312	1.8624	+	1.12707	1.04579	1.09119	3	1.08802	0.0407327	0.000720829	0.309946	0.263849	0.505303	3	0.359699	0.128186	0.0392212
10874	Q9JHJ0	71	S	Q9JHJ0	S71	Tropomodulin-3	Tmod3	TSKSATGPFDRERLLSYLEKQALEHKDRDDY	LLS(1)YLEK	LLS(42.9)Y(-42.9)LEK	3	0.00552863	116.52	2	473.238	0.78748	+	1.15972	1.00035		2	1.08003	0.112692	0.000720829	0.347087	0.326295		2	0.336691	0.0147021	0.0392212
3304	Q6PNC0;F8WGX5	922;922	S	Q6PNC0	S922	DmX-like protein 1	Dmxl1	WLPEEHYSSSPEKILSPFSQKFQACRANLQS	ILS(1)PFSQK	ILS(63.59)PFS(-63.59)QK	3	0.000999391	139.15	2	500.249	0.94414	+	0.834039	0.743212	0.838902	3	0.805384	0.0538977	0.00422431	0.308565	0.289031	0.378564	3	0.325387	0.0470772	0.0392212
9619	Q8VDJ3	645	S	Q8VDJ3	S645	Vigilin	Hdlbp	TGKRANCEAARSRILSIQKDLANIAEVEVSI	SRILS(1)IQK	S(-51.85)RILS(51.85)IQK	5	0.00443613	92.611	3	342.19	2.3043	+	0.707979	0.818576	0.915495	3	0.814017	0.103833	0.00422431	0.29163	0.299377	0.388521	3	0.326509	0.0538433	0.0392212
2901	Q9QXS1-3;E9QMZ5;Q9QXS1-6;E9Q3W4;Q9QXS1-15;Q9QXS1-10;E9Q153;Q9QXS1-9;Q9QXS1-12;E9QKX4;Q9QXS1-11;Q9QXS1-13;E9QLJ5;Q9QXS1-5;E9PY96;Q9QXS1-16;Q9QXS1-4;E9QL05;Q9QXS1-14;E9QQ00;Q9QXS1-7;Q9QXS1-8;E9QK43;Q9QXS1;Q9QXS1-2;E9QPE8;E9QN87	4265;4265;4294;4108;4171;4233;4233;4238;4243;4243;4248;4256;4256;4265;4265;4266;4270;4270;4272;4272;4299;4311;4311;4413;4408;4408;4413	S	Q9QXS1-3;Q9QXS1	S4265	Plectin	Plec	SSYPISSAGPRTQLASWSDPTEETGPVAGIL	T(0.011)QLAS(0.934)WS(0.046)DPT(0.003)EET(0.005)GPVAGILDTETLEK	T(-19.1)QLAS(13.06)WS(-13.06)DPT(-24.39)EET(-22.41)GPVAGILDT(-96.18)ET(-108.48)LEK	5	1.16863e-83	160.83	3	990.129	0.35646	+	0.679891	0.857628	0.825475	3	0.787665	0.0947091	0.00484222	0.303714	0.302829	0.38145	3	0.329331	0.0451387	0.0392212
6664	Q60790	207	S	Q60790	S207	Ras GTPase-activating protein 3	Rasa3	PQFDEVFYFEVTRPCSYSKKSHFDFEEEDVD	TNNPQFDEVFYFEVT(0.006)RPCS(0.936)Y(0.027)S(0.031)K	T(-75.57)NNPQFDEVFY(-51.58)FEVT(-21.64)RPCS(14.84)Y(-15.45)S(-14.84)K	19	3.84754e-11	114.53	3	936.739	0.26966	+	0.872139	0.836457	0.503721	3	0.737439	0.20319	0.0105574	0.278041	0.306318	0.425899	3	0.336753	0.0784871	0.0392212
8442	Q8BQ30;Q8BQ30-2	224;224	S	Q8BQ30	S224	Phostensin	Ppp1r18	GDDSPKRKEVLESILSPGEPGDQKASPTDVH	EVLESILS(1)PGEPGDQK	EVLES(-45.14)ILS(45.14)PGEPGDQK	8	3.85142e-46	168.81	3	593.28	-0.10526	+	0.691002	0.69428	0.582229	3	0.655837	0.0637673	0.0113543	0.292779	0.335418	0.381847	3	0.336681	0.0445475	0.0392212
3232	Q8VI36;Q8VI36-2;F8VQ28	258;258;258	S	Q8VI36	S258	Paxillin	Pxn	SSPQRVTSSQQQTRISASSATRELDELMASL	IS(0.907)AS(0.038)S(0.038)AT(0.018)RELDELMASLSDFK	IS(13.81)AS(-13.81)S(-13.81)AT(-17.03)RELDELMAS(-49.24)LS(-55.91)DFK	2	5.45203e-05	100.02	3	784.366	2.3662	+	0.471101	0.650793	1.03764	3	0.719846	0.289516	0.0122671	0.24916	0.416124	0.485452	3	0.383579	0.121462	0.0392212
8307	Q8BI72	441	S	Q8BI72	S441	CDKN2A-interacting protein	Cdkn2aip	LYKTVAWKLVAVGGFSPTVNHGELLNAAIEA	LVAVGGFS(0.993)PT(0.007)VNHGELLNAAIEALK	LVAVGGFS(21.57)PT(-21.57)VNHGELLNAAIEALK	8	2.63928e-32	126.51	3	867.454	0.71423	+		0.569959	0.595885	2	0.582922	0.0183326	0.0155693		0.330393	0.33366	2	0.332027	0.0023097	0.0392212
6229	Q9Z1S8;Q3ZB57	532;532	S	Q9Z1S8	S532	GRB2-associated-binding protein 2	Gab2	LDLRNNTVIDELPFKSPVTKSWSRINHTFNS	NNTVIDELPFKS(0.938)PVT(0.062)K	NNT(-84.9)VIDELPFKS(11.81)PVT(-11.81)K	12	4.67146e-08	148.85	3	627.983	1.2045	+	0.525019	0.530213	0.666996	3	0.574076	0.0805133	0.0172552	0.332183	0.256718	0.368465	3	0.319122	0.057007	0.0392212
5108	P58252	360	S	P58252	S360	Elongation factor 2	Eef2	PAGDALLQMITIHLPSPVTAQKYRCELLYEG	WLPAGDALLQMITIHLPS(0.991)PVT(0.009)AQK	WLPAGDALLQMIT(-44.75)IHLPS(20.25)PVT(-20.25)AQK	18	6.8208e-17	102.61	4	670.854	-1.0085	+	0.235503	0.421571	0.687717	3	0.448264	0.227285	0.0502359	0.307973	0.245439	0.503513	3	0.352308	0.134628	0.0392212
9708	Q91V08	12	S	Q91V08	S12	C-type lectin domain family 2 member D	Clec2d	____MCVTKASLPMLSPTGSPQEVEVGKILQ	ASLPMLS(0.944)PT(0.055)GS(0.001)PQEVEVGK	AS(-72.65)LPMLS(12.36)PT(-12.36)GS(-30.38)PQEVEVGK	7	1.24136e-07	118.05	2	1003.98	1.2681	+		0.323458	0.405199	2	0.364329	0.0577992	0.0657377		0.244747	0.373978	2	0.309363	0.0913801	0.0392212
6903	Q61730	556	S	Q61730	S556	Interleukin-1 receptor accessory protein	Il1rap	QLQVAMPVKKSPRWSSNDKQGLSYSSLKNV_	WS(0.153)S(0.847)NDKQGLSYSSLK	WS(-7.43)S(7.43)NDKQGLS(-59.38)Y(-63.99)S(-68)S(-71.15)LK	3	0.00459235	75.911	3	593.936	-0.078516	+	0.295655	0.295765		2	0.29571	7.77194e-05	0.0868369	0.511196	0.228067		2	0.369631	0.200202	0.0392212
3626	P58044;G3XA48	216;272	S	P58044	S216	Isopentenyl-diphosphate Delta-isomerase 1	Idi1	ADTFLFKWWDNLNHLSPFVDHEKIHRL____	WWDNLNHLS(1)PFVDHEK	WWDNLNHLS(59.63)PFVDHEK	9	0.000753781	77.969	4	529.987	2.1769	+	0.106463	0.37517	0.596073	3	0.359235	0.245194	0.109361	0.315864	0.275818	0.565016	3	0.385566	0.156693	0.0392212
11733	D3Z158;Q8BML9	3;3	T	D3Z158	T3		Qars	_____________MATPDSLALFTGLGLSEN	AT(0.917)PDS(0.083)LALFTGLGLSENK	AT(10.41)PDS(-10.41)LALFT(-68.39)GLGLS(-131.1)ENK	2	6.20803e-16	146.81	2	978.472	1.3253	+		0.102537	0.266137	2	0.184337	0.115683	0.293567		0.8147	0.300431	2	0.557566	0.363643	0.0392212
2746	Q5PSV9;E9QK89	160;160	S	Q5PSV9	S160	Mediator of DNA damage checkpoint protein 1	Mdc1	LTIEKTPRIRIESQNSRVLLAADSEEEGDFP	IRIES(0.016)QNS(0.984)R	IRIES(-17.97)QNS(17.97)R	8	0.00311373	126.66	2	591.785	-1.2678	+		0.97923	-0.0164065	2	0.481412	0.704021	0.616051		0.260215	0.365513	2	0.312864	0.074457	0.0392212
6974	Q62245	1120	S	Q62245	S1120	Son of sevenless homolog 1	Sos1	FDSDHSASPFHSRSASVSSISLSKGTDEVPV	S(0.001)AS(0.998)VS(0.001)SISLSK	S(-29.18)AS(29.18)VS(-30.62)S(-52.21)IS(-81.4)LS(-108.8)K	3	0.000115575	130.61	2	573.276	-0.55105	+	0.549187	0.814853	0.91364	3	0.759227	0.188487	0.00765524	0.278618	0.3085	0.357872	3	0.314997	0.0400243	0.0394624
6357	Q569Z6;Q8BZN7	572;572	S	Q569Z6	S572	Thyroid hormone receptor-associated protein 3	Thrap3	SFSITREAQVNVRMDSFDEDLARPSGLLAQE	MDS(1)FDEDLARPSGLLAQER	MDS(87.38)FDEDLARPS(-87.38)GLLAQER	3	0.000165703	94.176	3	744	-0.9009	+	0.45194		0.65496	2	0.55345	0.143557	0.0221505	0.361281		0.331661	2	0.346471	0.0209449	0.0394624
4883	P47809;B1ATL6	78;89	S	P47809	S78	Dual specificity mitogen-activated protein kinase kinase 4	Map2k4	TTGVQNPHIERLRTHSIESSGKLKISPEQHW	LRTHS(1)IESSGK	LRT(-38.15)HS(36.04)IES(-36.04)S(-40.98)GK	5	0.00112752	99.796	3	432.21	0.2031	+	0.370309	0.75496	0.560446	3	0.561905	0.192329	0.0230765	0.291494	0.306661	0.347647	3	0.315267	0.0290491	0.0394624
14551	P62960;Q9JKB3;Q9JKB3-2	97;123;123	Y	P62960;Q9JKB3	Y97	Nuclease-sensitive element-binding protein 1;Y-box-binding protein 3	Ybx1;Ybx3	VFVHQTAIKKNNPRKYLRSVGDGETVEFDVV	Y(0.828)LRS(0.172)VGDGETVEFDVVEGEK	Y(6.81)LRS(-6.81)VGDGET(-47.14)VEFDVVEGEK	1	2.21427e-69	188.9	3	770.018	0.02988	+	1.08846	0.889879	0.892214	3	0.956849	0.11398	0.00260599	0.327071	0.344432	0.268951	3	0.313485	0.0395317	0.0405461
5248	P62960;Q9JKB3;Q9JKB3-2	100;126;126	S	P62960;Q9JKB3	S100	Nuclease-sensitive element-binding protein 1;Y-box-binding protein 3	Ybx1;Ybx3	HQTAIKKNNPRKYLRSVGDGETVEFDVVEGE	YLRS(0.999)VGDGET(0.001)VEFDVVEGEK	Y(-73.62)LRS(32.86)VGDGET(-32.86)VEFDVVEGEK	4	6.17631e-41	168.99	2	1154.52	-0.12799	+	0.843936	1.01191	0.953232	3	0.936359	0.0852478	0.00260599	0.350811	0.303887	0.294316	3	0.316338	0.0302358	0.0405461
14131	Q9CY58;Q9CY58-2;Q9CY58-3	387;372;366	T	Q9CY58	T387	Plasminogen activator inhibitor 1 RNA-binding protein	Serbp1	RGGRGRGGRPNRGSRTDKSSASAPDVDDPEA	T(0.879)DKS(0.093)S(0.027)AS(0.001)APDVDDPEAFPALA	T(9.77)DKS(-9.77)S(-15.15)AS(-28.65)APDVDDPEAFPALA	1	1.81599e-09	132.36	2	1092.47	1.9698	+	0.978139	0.852376	0.970373	3	0.933629	0.0704744	0.00260599	0.318542	0.255827	0.30615	3	0.293506	0.0332141	0.0405461
12020	E9Q6J5	894	T	E9Q6J5	T894		Bod1l	SSFKPEELPHKERRRTKSLLEDKVVSKSKSK	T(0.93)KS(0.07)LLEDK	T(11.21)KS(-11.21)LLEDK	1	0.00465662	110.08	2	507.249	-0.90352	+	0.956317	0.828331		2	0.892324	0.0904999	0.00307236	0.285	0.289433		2	0.287216	0.00313449	0.0405461
10323	Q9CY58;Q9CY58-2;Q9CY58-3	393;378;372	S	Q9CY58	S393	Plasminogen activator inhibitor 1 RNA-binding protein	Serbp1	GGRPNRGSRTDKSSASAPDVDDPEAFPALA_	T(0.002)DKS(0.034)S(0.028)AS(0.936)APDVDDPEAFPALA	T(-26.62)DKS(-14.37)S(-15.26)AS(14.37)APDVDDPEAFPALA	7	3.84658e-07	119.18	2	1092.47	1.3071	+	0.85823	0.7329		2	0.795565	0.0886218	0.00422431	0.291885	0.255079		2	0.273482	0.0260256	0.0405461
10789	Q9ERU9	1440	S	Q9ERU9	S1440	E3 SUMO-protein ligase RanBP2;Putative peptidyl-prolyl cis-trans isomerase	Ranbp2	PTVSRCIACQNTKSASSFVQTSFKFGQGDLP	S(0.089)AS(0.911)SFVQTSFK	S(-10.1)AS(10.1)S(-48.38)FVQT(-108.54)S(-112.7)FK	3	7.92501e-16	156.2	2	634.782	1.2282	+	0.739018	0.836666		2	0.787842	0.0690473	0.00422431	0.302291	0.274597		2	0.288444	0.0195831	0.0405461
9040	Q9R016;Q8CGT2	1398;1398	S	Q9R016	S1398	Baculoviral IAP repeat-containing protein 1e	Naip5	QSKRLIIFWKLIVPFSPVILE__________	LIVPFS(1)PVILE	LIVPFS(71.18)PVILE	6	0.000273796	105.2	2	653.857	1.8658	+	0.796928	0.816381	0.751904	3	0.788404	0.0330726	0.00474248	0.270665	0.296753	0.342858	3	0.303425	0.0365561	0.0405461
5090	P57725;D3Z0Y1	297;426	S	P57725	S297	SAM domain-containing protein SAMSN-1	Samsn1	IELNIADPEDRARLLSAAESLLDEETTVEHE	LLS(1)AAESLLDEETTVEHEK	LLS(60.39)AAES(-60.39)LLDEET(-201.57)T(-218.5)VEHEK	3	0	282.1	3	732.01	0.24975	+	0.742717	0.636137	0.90518	3	0.761345	0.135485	0.0066267	0.329096	0.20515	0.39665	3	0.310299	0.0971238	0.0405461
8082	Q80XQ2	811	S	Q80XQ2	S811	TBC1 domain family member 5	Tbc1d5	SPDDDSSKESGFTIVSPLDI___________	ESGFTIVS(1)PLDI	ES(-69.7)GFT(-60.11)IVS(60.11)PLDI	8	4.69047e-06	137.09	2	679.318	1.1565	+	0.652063		0.801151	2	0.726607	0.105421	0.00759552	0.266594		0.513102	2	0.389848	0.174308	0.0405461
10921	Q9JJF3	107	S	Q9JJF3	S107	Bifunctional lysine-specific demethylase and histidyl-hydroxylase NO66	No66	RSAEPRPVSARPRSASATLPSRVEGWAALSR	S(0.004)AS(0.948)AT(0.049)LPSRVEGWAALSR	S(-24.24)AS(12.91)AT(-12.91)LPS(-41.1)RVEGWAALS(-54.67)R	3	2.17197e-16	166.38	2	969.975	-1.7593	+	0.72654	0.641752	0.767843	3	0.712045	0.0642832	0.00759552	0.269678	0.301638	0.305105	3	0.29214	0.01953	0.0405461
7817	Q7TQH0;Q3TGG2;E9Q5Q0;Q7TQH0-2;Q7TQH0-3	453;367;333;447;447	S	Q7TQH0;Q7TQH0-2	S453	Ataxin-2-like protein	Atxn2l	AALPFLPVGRMYPPRSPKSAAPAPVSASCPE;SVPPTSAVGRMYPPRSPKSAAPAPVSASCPE	MYPPRS(1)PK	MY(-75.84)PPRS(75.84)PK	6	0.00182821	106.16	2	528.241	0.1974	+	0.581073	0.67032	1.02811	3	0.759835	0.236581	0.00822499	0.231932	0.248978	0.512819	3	0.331243	0.15748	0.0405461
7301	Q6NV99	638	S	Q6NV99	S638		Haus6	SSTLHNQREFSLAIFSPDFDRSYFPEEKAVS	EFSLAIFS(1)PDFDRSYFPEEK	EFS(-49.9)LAIFS(49.9)PDFDRS(-61.52)Y(-60.83)FPEEK	8	3.00316e-07	120.9	3	835.373	0.15749	+	0.698788	0.636157	0.719854	3	0.684933	0.0435349	0.00906146	0.309831	0.342087	0.305632	3	0.319183	0.0199461	0.0405461
1422	Q921C5;D3Z390;Q921C5-2	331;257;331	S	Q921C5	S331	Protein bicaudal D homolog 2	Bicd2	DNKTSTPRKDGLAPPSPSLVSDLLSELHISE	DGLAPPS(0.984)PS(0.016)LVSDLLSELHISEIQK	DGLAPPS(17.99)PS(-17.99)LVS(-50.54)DLLS(-94.22)ELHIS(-117.09)EIQK	7	4.0211e-43	141.87	3	909.128	0.1995	+	0.49751	0.811421	0.793444	3	0.700792	0.176276	0.0110236	0.245782	0.243906	0.472125	3	0.320604	0.131224	0.0405461
9159	Q8CJF7	2202	S	Q8CJF7	S2202	Protein ELYS	Ahctf1	WSPPPVEIKLVSPLASPVDEIKTGKPRKTAE	LVS(1)PLAS(1)PVDEIK	LVS(120.56)PLAS(120.56)PVDEIK	7	1.93911e-53	189.77	2	764.359	0.73001	+	0.647187	0.536078		2	0.591633	0.0785658	0.0143594	0.290459	0.275703		2	0.283081	0.010434	0.0405461
10708	Q9EPQ8;Q9EPQ8-2	1287;1287	S	Q9EPQ8	S1287	Transcription factor 20	Tcf20	DHSSQNPLIMRRRVRSFISPIPSKRQSQDVK	VRS(0.976)FIS(0.024)PIPSK	VRS(16.15)FIS(-16.15)PIPS(-74.68)K	3	0.00607953	84.507	3	437.567	0.96776	+	0.622235	0.58563	0.565415	3	0.591093	0.0288011	0.0148188	0.331959	0.223132	0.365351	3	0.306814	0.0743691	0.0405461
4582	P20152;A2AKJ2	39;39	S	P20152	S39	Vimentin	Vim	PSSNRSYVTTSTRTYSLGSALRPSTSRSLYS	T(0.009)YS(0.989)LGS(0.002)ALRPSTSR	T(-20.6)Y(-64.52)S(20.6)LGS(-27.49)ALRPS(-42.8)T(-35.02)S(-48.88)R	3	0.000590948	105	2	788.38	1.3683	+		0.497524	0.508302	2	0.502913	0.00762136	0.0245729		0.330109	0.278354	2	0.304232	0.0365963	0.0405461
7699	Q71FD5	141	S	Q71FD5	S141	E3 ubiquitin-protein ligase ZNRF2	Znrf2	RPAGGGPGGPRLVIGSLPAHLSPHLFGGFKC	LVIGS(1)LPAHLS(1)PHLFGGFK	LVIGS(70.34)LPAHLS(70.34)PHLFGGFK	5	4.53696e-05	99.13	3	717.358	2.8876	+	0.486685		0.428431	2	0.457558	0.0411922	0.0364373	0.270155		0.375409	2	0.322782	0.0744254	0.0405461
569	A2AWL7;E9QLG3;H7BX50;A2AWL7-3;A2AWL7-2;A2AWL7-4	448;448;448;448;448;448	S	A2AWL7	S448	MAX gene-associated protein	Mga	DNLEADHPSYKWLPNSPGVAKAKMFKLDAGK	WLPNS(1)PGVAK	WLPNS(103.44)PGVAK	5	0.000420985	103.46	3	383.522	0.17948	+	0.281851	0.451065	0.783913	3	0.50561	0.255437	0.0375565	0.279369	0.216641	0.540095	3	0.345368	0.17153	0.0405461
4329	P01101	373	S	P01101	S373	Proto-oncogene c-Fos	Fos	HRKGSSSNEPSSDSLSSPTLLAL________	KGS(0.232)S(0.316)S(0.447)NEPS(0.002)S(0.005)DS(0.016)LS(0.782)S(0.2)PTLLAL	KGS(-2.87)S(-1.57)S(1.57)NEPS(-25.32)S(-20.4)DS(-16.43)LS(6.07)S(-6.07)PT(-37.5)LLAL	14	0.00191243	93.166	2	1118.98	1.4561	+	0.525136		0.400259	2	0.462697	0.0883012	0.0390435	0.329634		0.326933	2	0.328283	0.00190957	0.0405461
2307	E9Q4P1	408	S	E9Q4P1	S408		Wdfy1	WDMTPVVGCSLATGFSPH_____________	IWDMTPVVGCSLAT(0.003)GFS(0.997)PH	IWDMT(-67.58)PVVGCS(-45.91)LAT(-24.66)GFS(24.66)PH	17	5.75889e-123	199.99	3	718.984	1.0218	+		0.287152	0.428757	2	0.357955	0.10013	0.0690005		0.435797	0.276807	2	0.356302	0.112423	0.0405461
6091	Q9R210;Q3UKG7;D3Z6Q7	113;172;113	S	Q9R210	S113	Transcription factor EB	Tfeb	TYGNKFAAHVSPAQGSPKPAPAASPGVRAGH	FAAHVSPAQGS(1)PKPAPAAS(1)PGVR	FAAHVS(-39.95)PAQGS(39.95)PKPAPAAS(59.02)PGVR	11	0.000519549	96.143	4	590.779	-1.9104	+		0.333246	0.186673	2	0.259959	0.103643	0.159907		0.191451	0.473028	2	0.332239	0.199105	0.0405461
8845	Q8C2K1;Q8C2K1-2	590;217	S	Q8C2K1	S590	Differentially expressed in FDCP 6	Def6	LARRDSSLKRLTRWGSQGNRTLSVNSSEQKS	WGS(1)QGNRTLSVNSSEQK	WGS(41.39)QGNRT(-41.39)LS(-46.12)VNS(-50.82)S(-48.3)EQK	3	6.86463e-24	166.93	2	979.442	-0.55291	+	0.245216	0.329093	0.471482	3	0.348597	0.114387	0.0725609	0.228986	0.307988	0.353234	3	0.296736	0.0628834	0.0407614
13503	Q80UJ7	535	T	Q80UJ7	T535	Rab3 GTPase-activating protein catalytic subunit	Rab3gap1	NCCIERKKARDEGKKTSLSDSTTSAYPGDAG	KT(0.894)S(0.089)LS(0.016)DST(0.001)TSAYPGDAGK	KT(10.01)S(-10.01)LS(-17.49)DS(-33.27)T(-31.43)T(-47.25)S(-54.4)AY(-82.44)PGDAGK	2	1.13725e-14	143.17	3	622.61	1.2637	+		0.944596	0.82206	2	0.883328	0.0866464	0.00329304		0.222274	0.322996	2	0.272635	0.0712208	0.0425409
4990	P51150	72	S	P51150	S72	Ras-related protein Rab-7a	Rab7a	VTMQIWDTAGQERFQSLGVAFYRGADCCVLV	FQS(1)LGVAFYR	FQS(80.48)LGVAFY(-80.48)R	3	0.000623576	104.7	2	634.297	0.27999	+	0.326786	0.284408	0.446578	3	0.352591	0.0841082	0.0677251	0.244888	0.22308	0.427036	3	0.298335	0.11199	0.0470516
2745	Q5PSV9;E9QK89	157;157	S	Q5PSV9	S157	Mediator of DNA damage checkpoint protein 1	Mdc1	RSLLTIEKTPRIRIESQNSRVLLAADSEEEG	IRIES(1)QNSR	IRIES(38.13)QNS(-38.13)R	5	0.0017048	134.18	2	591.785	-1.0697	+	0.716613	0.799175		2	0.757894	0.0583805	0.00484222	0.238215	0.318042		2	0.278129	0.0564466	0.0493888
8496	Q8BSK8;Q8BSK8-2	452;429	S	Q8BSK8	S452	Ribosomal protein S6 kinase beta-1	Rps6kb1	RFIGSPRTPVSPVKFSPGDFWGRGASASTAN	T(0.004)PVS(0.996)PVKFS(1)PGDFWGR	T(-23.78)PVS(23.78)PVKFS(57.55)PGDFWGR	9	0.00970209	77.221	3	646.285	0.98745	+	0.706231	0.668423		2	0.687327	0.0267343	0.00822499	0.358913	0.2058		2	0.282356	0.108267	0.0493888
8444	Q8BQ30;Q8BQ30-2	194;194	S	Q8BQ30	S194	Phostensin	Ppp1r18	RDLSSRPAEAQKWRLSPGETPEESLRLAGSG	WRLS(0.999)PGET(0.001)PEESLR	WRLS(29.42)PGET(-29.42)PEES(-57.58)LR	4	0.000629276	98.882	3	579.605	1.2995	+	0.24197	0.333951	0.686723	3	0.420881	0.234775	0.0608164	0.246501	0.206016	0.421498	3	0.291338	0.114525	0.0521224
3393	Q6NZL6;G3UW83	873;873	S	Q6NZL6	S873	Tonsoku-like protein	Tonsl	CPARPRTRVKQSRLTSLDGWCARTQAGDGSL	LT(0.008)S(0.992)LDGWCAR	LT(-20.73)S(20.73)LDGWCAR	3	1.17032e-08	142.76	2	629.768	-0.44724	+	0.913597	0.79715	0.926758	3	0.879168	0.0713343	0.00329304	0.260317	0.218614	0.334785	3	0.271239	0.0588504	0.0521299
13568	Q8BGF7;Q8BGF7-4;Q8BGF7-3;Q8BGF7-2	1187;1153;1160;1178	T	Q8BGF7	T1187	PAB-dependent poly(A)-specific ribonuclease subunit 2	Pan2	KGRKMDWKVPEPESQTSPKNAAVFSVLAL__	MDWKVPEPES(0.001)QT(0.788)S(0.211)PK	MDWKVPEPES(-30.4)QT(5.72)S(-5.72)PK	12	0.00312625	78.78	3	613.606	-1.5501	+	0.154028	0.0867157		2	0.120372	0.0475971	0.385924	0.364597	0.197087		2	0.280842	0.118447	0.0525221
13586	Q8BHB4	342	T	Q8BHB4	T342	WD repeat-containing protein 3	Wdr3	KKARLNSANEEEDPETSVSMTLQDEILRVAK	ARLNSANEEEDPET(0.816)S(0.179)VS(0.005)MT(0.001)LQDEILRVAK	ARLNS(-39.47)ANEEEDPET(6.59)S(-6.59)VS(-22.05)MT(-30.89)LQDEILRVAK	14	9.64739e-11	105.52	3	1109.19	1.5212	+	0.518961	0.446677		2	0.482819	0.0511127	0.0259929	0.224863	0.33264		2	0.278752	0.0762101	0.0532949
4830	P42128	431	S	P42128	S431	Forkhead box protein K1	Foxk1	RSSGLQTPECLSREGSPIPHDPDLGSKLASV	SSGLQT(0.004)PECLS(0.017)REGS(0.979)PIPHDPDLGSK	S(-45.04)S(-45.04)GLQT(-24.34)PECLS(-17.55)REGS(17.55)PIPHDPDLGS(-61.12)K	15	1.00566e-05	85.376	4	711.827	1.6483	+		0.813648	0.613358	2	0.713503	0.141626	0.0087336		0.274597	0.263317	2	0.268957	0.00797604	0.0533575
2425	E9Q6J5	236	S	E9Q6J5	S236		Bod1l	EMSNAKVSERTSRKLSSQPSTDVSTDKERGS	KLS(0.943)S(0.057)QPSTDVSTDK	KLS(12.21)S(-12.21)QPS(-38.54)T(-42.3)DVS(-68.4)T(-75.44)DK	3	0.00330469	120.74	3	524.91	-1.1117	+	0.460853	0.737089	0.804709	3	0.66755	0.18217	0.012614	0.195077	0.276783	0.384997	3	0.285619	0.0952679	0.0533575
7011	Q62415	335	S	Q62415	S335	Apoptosis-stimulating of p53 protein 1	Ppp1r13b	KKIQLNRVNGTSSPQSPLSTSGRVAAVGPYI	VNGTS(0.008)S(0.008)PQS(0.984)PLSTSGR	VNGT(-41.01)S(-21.13)S(-21.13)PQS(21.13)PLS(-33.57)T(-39.64)S(-45.59)GR	9	0.00184545	106.86	2	827.875	-0.95163	+		0.477353	0.209476	2	0.343414	0.189418	0.111623		0.272607	0.264249	2	0.268428	0.00590992	0.0533575
5048	P54227;D3Z1Z8;D3Z5N2	28;28;28	S	P54227	S28	Stathmin	Stmn1	KRASGQAFELILSPRSKESVPDFPLSPPKKK	RAS(1)GQAFELILS(0.003)PRS(0.997)K	RAS(54.41)GQAFELILS(-24.59)PRS(24.59)K	15	0.0126622	92.8	3	640.643	-0.2368	+	0.190724	0.226058		2	0.208391	0.0249853	0.166536	0.231976	0.283346		2	0.257661	0.0363241	0.0533575
9389	Q8R080	525	S	Q8R080	S525	G2 and S phase-expressed protein 1	Gtse1	TRRMSVLPTPASRRLSSLPLMAPQSMPRALV	RLS(0.892)S(0.108)LPLMAPQSMPR	RLS(9.16)S(-9.16)LPLMAPQS(-84.43)MPR	3	0.000520156	91.812	3	588.628	-1.6929	+	0.675072	0.626094	0.554536	3	0.618567	0.0606196	0.0136328	0.23188	0.322012	0.280139	3	0.27801	0.0451038	0.053934
8345	Q8BJL1	383	S	Q8BJL1	S383	F-box only protein 30	Fbxo30	CWKKVDLGDLKDVNGSPFSHAPSFKFLSNSW	DVNGS(0.999)PFS(0.001)HAPSFK	DVNGS(30.05)PFS(-30.05)HAPS(-74.63)FK	5	0.000236496	94.325	3	523.896	-1.831	+	0.579681	0.559871	0.577492	3	0.572348	0.0108608	0.0164183	0.249322	0.206394	0.347937	3	0.267884	0.0725745	0.053934
14461	Q63844;D3Z6D8;D3Z3G6	205;90;205	Y	Q63844	Y205	Mitogen-activated protein kinase 3	Mapk3	RIADPEHDHTGFLTEYVATRWYRAPEIMLNS	IADPEHDHTGFLT(0.009)EY(0.984)VAT(0.007)R	IADPEHDHT(-41.39)GFLT(-20.51)EY(20.51)VAT(-21.4)R	15	0.00493996	78.078	4	563.756	-0.6625	+	1.05979	0.831799	0.896607	3	0.929399	0.11748	0.00260599	0.250271	0.290836	0.266907	3	0.269338	0.0203911	0.0560421
2432	E9Q6J5	795	S	E9Q6J5	S795		Bod1l	DRTERKSKHKSERRLSVLGRDGKPVSEYTIK	RLS(1)VLGR	RLS(72.2)VLGR	3	0.00853074	89.886	3	294.164	0.60988	+	0.541417	0.565541	0.785501	3	0.630819	0.1345	0.0131525	0.229251	0.231597	0.321919	3	0.260922	0.0528376	0.0560421
4605	P22893	52	S	P22893	S52	Tristetraprolin	Zfp36	SIPSGVTSRLTGRSTSLVEGRSCGWVPPPPG	S(0.005)T(0.008)S(0.987)LVEGR	S(-22.64)T(-20.95)S(20.95)LVEGR	3	0.00422922	95.483	2	464.71	0.5784	+	0.412259	0.338994	0.323105	3	0.358119	0.0475545	0.0677251	0.350607	0.217589	0.265024	3	0.27774	0.0674143	0.0560421
4603	P22893	178	S	P22893	S178	Tristetraprolin	Zfp36	DLALPGQPHVLRQSISFSGLPSGRRSSPPPP	QS(0.001)IS(0.964)FS(0.035)GLPS(0.001)GR	QS(-32.56)IS(14.38)FS(-14.38)GLPS(-32.47)GR	4	0.000267731	90.259	2	658.306	-0.88803	+	0.251954	0.179264	0.364265	3	0.265161	0.0932047	0.129385	0.304983	0.195983	0.295884	3	0.265616	0.0604759	0.0560421
7575	Q6PIU9	115	S	Q6PIU9	S115	Uncharacterized protein FLJ45252 homolog		QGGKKSQFLPINQRASDDLGEPDVFATAPFR	SQFLPINQRAS(1)DDLGEPDVFATAPFR	S(-41.53)QFLPINQRAS(41.53)DDLGEPDVFAT(-61.24)APFR	11	1.86123e-05	92.623	3	991.138	-1.2272	+	0.81932	0.655263	0.744583	3	0.739722	0.0821364	0.00684717	0.256388	0.25193	0.27022	3	0.259513	0.00953679	0.0582032
9235	Q8K1R7	834	S	Q8K1R7	S834	Serine/threonine-protein kinase Nek9	Nek9	LRKELENAEFIPMPDSPAPLSAAFSQSEKDT	ELENAEFIPMPDS(0.999)PAPLS(0.001)AAFSQSEK	ELENAEFIPMPDS(32.22)PAPLS(-32.22)AAFS(-38.08)QS(-49.46)EK	13	2.62391e-33	111.65	3	962.437	1.0848	+	0.581574	0.596905	0.665385	3	0.614621	0.0446261	0.013424	0.241898	0.181358	0.415635	3	0.27963	0.121611	0.0582032
5046	P54227;D3Z1Z8;D3Z5N2	16;16;16	S	P54227	S16	Stathmin	Stmn1	MASSDIQVKELEKRASGQAFELILSPRSKES	RAS(1)GQAFELILS(0.979)PRS(0.021)K	RAS(75.36)GQAFELILS(16.59)PRS(-16.59)K	3	7.87202e-55	193.42	3	640.643	-0.42236	+	0.658393	0.588025	0.575249	3	0.607222	0.0447731	0.013838	0.264617	0.278296	0.252658	3	0.26519	0.0128287	0.0582032
10410	Q9D154	378	S	Q9D154	S378	Leukocyte elastase inhibitor A	Serpinb1a	RHNPTSNVLFLGRVCSP______________	HNPTSNVLFLGRVCS(1)P	HNPT(-82.95)S(-82.21)NVLFLGRVCS(82.21)P	15	0.00264446	85.976	3	626.629	-1.2851	+	-0.0123203	0.0719188	0.0139542	3	0.0245176	0.0431016	0.958959	0.229435	0.253483	0.287241	3	0.25672	0.0290385	0.0582032
9388	Q8R080	476	S	Q8R080	S476	G2 and S phase-expressed protein 1	Gtse1	PGGVTPKFSRTHRLQSWTPASRVVSSTPVRR	LQS(0.993)WT(0.007)PASR	LQS(21.61)WT(-21.61)PAS(-77.59)R	3	1.38681e-08	153.75	2	563.258	1.0589	+	0.715753	0.704022		2	0.709887	0.00829504	0.00684717	0.225074	0.261001		2	0.243038	0.0254039	0.0589321
12247	Q61194;Q61194-2;F8VPL2	1555;1527;1555	T	Q61194	T1555	Phosphatidylinositol 4-phosphate 3-kinase C2 domain-containing subunit alpha	Pik3c2a	AEGIARSAGAVPFSPTLGQIGGAVKLSVSYR	SAGAVPFS(0.089)PT(0.911)LGQIGGAVK	S(-51.21)AGAVPFS(-10.09)PT(10.09)LGQIGGAVK	10	4.78709e-07	107.5	3	612.98	-0.82627	+	0.896818	0.656989	0.594722	3	0.716176	0.159508	0.00906146	0.206203	0.200714	0.380218	3	0.262378	0.102089	0.0629715
2426	E9Q6J5	237	S	E9Q6J5	S237		Bod1l	MSNAKVSERTSRKLSSQPSTDVSTDKERGSE	KLS(0.024)S(0.958)QPS(0.017)T(0.002)DVSTDK	KLS(-15.99)S(15.99)QPS(-17.64)T(-27.89)DVS(-43.19)T(-51.51)DK	4	4.89135e-80	201.22	2	786.861	0.61438	+	0.425322	0.762198	0.852942	3	0.680154	0.225307	0.0136328	0.223379	0.179207	0.481868	3	0.294818	0.163489	0.0629715
3697	Q8R081;G5E924;G3UY38	550;579;420	S	Q8R081	S550	Heterogeneous nuclear ribonucleoprotein L	Hnrnpl	KSERSSSGLLEWDSKSDALETLGFLNHYQMK	SSSGLLEWDS(0.149)KS(0.843)DALET(0.008)LGFLNHYQMK	S(-48.49)S(-42.94)S(-42.94)GLLEWDS(-7.52)KS(7.52)DALET(-20.33)LGFLNHY(-68.09)QMK	12	5.59495e-09	98.684	4	784.864	-1.9935	+	0.019324	0.10704		2	0.0631822	0.0620248	0.750536	0.204377	0.315277		2	0.259827	0.0784183	0.0629715
10226	Q9CQX4	28	S	Q9CQX4	S28	PCNA-associated factor	Paf	YRKAVASQAPRKVLGSSTFVTNSSSSSRKAE	VLGS(0.948)S(0.051)T(0.001)FVTNSSSSSR	VLGS(12.66)S(-12.66)T(-32.01)FVT(-47.88)NS(-67.78)S(-65.74)S(-70.32)S(-70.32)S(-70.32)R	4	0.00272127	99.409	2	848.383	-2.8214	+		0.17745	0.413649	2	0.295549	0.167018	0.125949		0.175048	0.332921	2	0.253984	0.111633	0.0633465
3186	Q9ESK9;F7CC56;E9PX56	243;161;243	S	Q9ESK9	S243	RB1-inducible coiled-coil protein 1	Rb1cc1	GSEKAEMKRSTELVLSPDMPRTTNTSLVTSF	RSTELVLS(1)PDMPR	RS(-46.34)T(-46.34)ELVLS(46.34)PDMPR	8	0.011243	68.261	3	527.588	0.06714	+	0.558385	0.442135		2	0.50026	0.082201	0.0240782	0.239879	0.225955		2	0.232917	0.00984586	0.0639092
6212	Q3V117;Q91V92;Q3TS02	455;455;455	S	Q3V117	S455	ATP-citrate synthase	Acly	NASGSTSTPAPSRTASFSESRADEVAPAKKA	T(0.078)AS(0.891)FS(0.02)ES(0.011)RADEVAPAK	T(-10.55)AS(10.55)FS(-16.48)ES(-19.12)RADEVAPAK	3	2.76745e-05	133.94	3	582.596	-2.2913	+	0.676657	0.545332	0.441339	3	0.554443	0.117923	0.0229732	0.321099	0.154394	0.335367	3	0.270287	0.10062	0.0653081
4298	O88746;Q3UDC3	160;160	S	O88746	S160	Target of Myb protein 1	Tom1	RRKGLEFPMTDLDMLSPIHTPQRTVFNSETP	GLEFPMTDLDMLS(1)PIHTPQR	GLEFPMT(-70.91)DLDMLS(59.74)PIHT(-59.74)PQR	13	6.37934e-19	131.64	3	793.369	0.54389	+	0.685581	0.611245	0.650878	3	0.649235	0.0371949	0.0115568	0.242923	0.338934	0.233327	3	0.271728	0.0583998	0.065638
2583	Q8BRT1;E9Q8N5;Q08EB6;F7DCH5	1021;1021;1022;1042	S	Q8BRT1	S1021	CLIP-associating protein 2	Clasp2	PRSRDYNPYNYSDSISPFNKSALKEAMFDDD	DYNPYNYSDSIS(1)PFNK	DY(-187.83)NPY(-150.59)NY(-136.33)S(-72.22)DS(-41.79)IS(41.79)PFNK	12	1.05241e-89	200.89	2	1002.41	-0.96332	+	0.524915	0.435	0.474204	3	0.47804	0.0450802	0.0295407	0.257801	0.254113	0.244598	3	0.252171	0.00681268	0.065638
4352	P05213;P68368	287;287	S	P05213;P68368	S287	Tubulin alpha-1B chain;Tubulin alpha-4A chain	Tuba1b;Tuba4a	YAPVISAEKAYHEQLSVAEITNACFEPANQM	AY(0.002)HEQLS(0.998)VAEITNACFEPANQMVK	AY(-26.53)HEQLS(26.53)VAEIT(-36.04)NACFEPANQMVK	7	3.44508e-28	110.4	3	944.091	-0.12391	+	0.258661	0.233352		2	0.246006	0.0178967	0.125936	0.236377	0.223626		2	0.230002	0.00901678	0.065638
9859	Q91ZW3	136	S	Q91ZW3	S136	SWI/SNF-related matrix-associated actin-dependent regulator of chromatin subfamily A member 5	Smarca5	PGRPRVKKDEKQNLLSVGDYRHRRTEQEEDE	QNLLS(1)VGDYR	QNLLS(59.96)VGDY(-59.96)R	5	0.00386107	84.41	2	622.787	-0.57416	+	0.919951	0.924026	0.902084	3	0.915354	0.0116713	0.00260599	0.205045	0.197446	0.334935	3	0.245809	0.0772792	0.0664748
14259	Q9ERU9	1526	T	Q9ERU9	T1526	E3 SUMO-protein ligase RanBP2;Putative peptidyl-prolyl cis-trans isomerase	Ranbp2	NEAHAIKCVACNNPVTPSLSTAPPSFKFGTS	CVACNNPVT(0.996)PS(0.004)LSTAPPSFK	CVACNNPVT(24.14)PS(-24.14)LS(-53.28)T(-53.28)APPS(-112.37)FK	9	7.76429e-143	200.87	2	1114	0.60698	+	0.956164	0.795602	0.824633	3	0.8588	0.08556	0.00367167	0.226667	0.248758	0.260625	3	0.24535	0.0172337	0.0664748
3872	H9KV00;Q9QX47;H9KV15;Q9QX47-3;F7CU80;H9KV02	2256;2256;2256;2216;398;266	S	H9KV00	S2256	Protein SON	Son	ISTAMSERALAQKRLSENAFDLEAMSMLNRA	RLS(1)ENAFDLEAMSMLNR	RLS(82.04)ENAFDLEAMS(-82.04)MLNR	3	9.09518e-142	233.56	3	692.98	2.2553	+	0.86172	0.70047	0.657676	3	0.739955	0.1076	0.00684717	0.260823	0.307111	0.226857	3	0.264931	0.040284	0.0664748
6828	Q61464;Q61464-4;E9QML5;Q61464-5;Q61464-7;Q61464-2;E9QKZ7;Q61464-3	381;381;381;381;381;381;381;381	S	Q61464	S381	Zinc finger protein 638	Znf638;Zfml	ESKKDYQSEADLPIRSPFGIVKASWLPKFTQ	DYQSEADLPIRS(1)PFGIVK	DY(-60.58)QS(-51.19)EADLPIRS(51.19)PFGIVK	12	0.000740493	86.073	3	705.677	-1.4359	+	0.58652	0.603101	0.632607	3	0.607409	0.0233436	0.0136328	0.207237	0.257198	0.277778	3	0.247404	0.0362757	0.0664748
7527	Q6PGF7	15	S	Q6PGF7	S15	Exocyst complex component 8	Exoc8	_MSDSGASRLRRQLESGGFEARLYVKQLSQQ	QLES(1)GGFEAR	QLES(82.52)GGFEAR	4	0.00167781	92.939	2	587.25	-0.31823	+	0.383582	0.360271	0.356113	3	0.366656	0.0148054	0.0608164	0.266185	0.266866	0.23185	3	0.254967	0.0200227	0.0664748
4604	P22893	180	S	P22893	S180	Tristetraprolin	Zfp36	ALPGQPHVLRQSISFSGLPSGRRSSPPPPGF	QSIS(0.143)FS(0.857)GLPSGR	QS(-50.18)IS(-7.78)FS(7.78)GLPS(-42.01)GR	6	0.000436611	99.711	2	658.306	1.4063	+	0.287936	0.283731		2	0.285833	0.00297355	0.0939972	0.244811	0.207392		2	0.226102	0.0264595	0.0664748
1529	Q9DB90;D3Z719;Q9DB90-2	32;32;32	S	Q9DB90	S32	Protein SMG9	Smg9	RRRWKEPGSSGPQNLSGPGGRERDYIAPWER	WKEPGSSGPQNLS(1)GPGGR	WKEPGS(-75.65)S(-70.99)GPQNLS(70.99)GPGGR	13	3.80557e-05	118.36	3	630.955	-1.8742	+	0.235048	0.204798	0.442024	3	0.293957	0.129119	0.111245	0.207741	0.215109	0.310292	3	0.244381	0.0571994	0.0664748
4539	P18608;D3Z607	7;7	S	P18608	S7	Non-histone chromosomal protein HMG-14	Hmgn1	_________MPKRKVSADGAAKAEPKRRSAR	KVS(1)ADGAAK	KVS(57.57)ADGAAK	3	0.00560424	89.44	3	309.483	0.63844	+	0.327134	0.371419	0.520641	3	0.406398	0.101385	0.0452176	0.20765	0.192428	0.334907	3	0.244995	0.0782371	0.0665343
7965	Q80UJ7	540	S	Q80UJ7	S540	Rab3 GTPase-activating protein catalytic subunit	Rab3gap1	RKKARDEGKKTSLSDSTTSAYPGDAGKTGGQ	KT(0.001)S(0.019)LS(0.004)DS(0.821)T(0.133)T(0.022)SAYPGDAGK	KT(-28.66)S(-16.42)LS(-23.32)DS(7.92)T(-7.92)T(-15.69)S(-32.92)AY(-102.43)PGDAGK	7	5.66164e-104	205.23	2	933.412	1.0213	+	0.835938	0.802952		2	0.819445	0.0233248	0.00367167	0.186059	0.315551		2	0.250805	0.0915644	0.066727
9653	Q8VE88;Q8VE88-2	119;112	S	Q8VE88	S119	Protein FAM114A2	Fam114a2	ISNVIEKAETSLGIPSPTEISAEVKQAAGEK	AET(0.002)S(0.002)LGIPS(0.982)PT(0.014)EISAEVK	AET(-26.55)S(-26.55)LGIPS(18.56)PT(-18.56)EIS(-55.2)AEVK	9	2.58632e-139	205.63	3	636.978	0.55214	+	0.799051	0.705342	0.71908	3	0.741158	0.0506054	0.0066267	0.234443	0.273024	0.236969	3	0.248146	0.0215827	0.066727
7041	Q62523	144	S	Q62523	S144	Zyxin	Zyx	EAPTQLPPQPREKVCSIDLEIDSLSSLLDDM	VCS(1)IDLEIDSLSSLLDDMTK	VCS(88.84)IDLEIDS(-88.84)LS(-103.79)S(-103.03)LLDDMT(-119.66)K	3	6.09104e-185	210.39	2	1167.53	-0.077817	+	0.731186	0.691179	0.767436	3	0.729933	0.038144	0.0066267	0.215433	0.183583	0.310283	3	0.236433	0.0659088	0.066727
9341	Q8K3A9	126	S	Q8K3A9	S126	7SK snRNA methylphosphate capping enzyme	Mepce	QPHRPPGGGGGKRRNSCNVGGGSGGSFKHPA	RRNS(1)CNVGGGSGGSFK	RRNS(83.86)CNVGGGS(-83.86)GGS(-91.06)FK	4	0.0103496	101.01	3	573.918	-0.76602	+	0.641544	0.627673	0.794904	3	0.68804	0.0928062	0.00906146	0.14802	0.293363	0.437814	3	0.293066	0.144897	0.066727
6861	Q61655;Q8R3C7;Q8BZY3	85;86;101	S	Q61655	S85	ATP-dependent RNA helicase DDX19A	Ddx19a;Ddx19b	VDNTNQVEVLQRDPSSPLYSVKSFEELRLKP	SNLVDNTNQVEVLQRDPS(0.062)S(0.88)PLY(0.021)S(0.036)VK	S(-44.86)NLVDNT(-36.37)NQVEVLQRDPS(-11.49)S(11.49)PLY(-16.17)S(-13.85)VK	19	1.78743e-12	108.09	4	721.354	1.2148	+	0.693999	0.532066	0.75654	3	0.660869	0.115846	0.011356	0.266851	0.176901	0.280379	3	0.241377	0.0562458	0.066727
4884	P47809;B1ATL6	81;92	S	P47809	S81	Dual specificity mitogen-activated protein kinase kinase 4	Map2k4	VQNPHIERLRTHSIESSGKLKISPEQHWDFT	LRTHSIES(0.95)S(0.049)GK	LRT(-51.47)HS(-33.9)IES(12.84)S(-12.84)GK	8	4.70669e-05	131.35	2	647.811	1.1853	+		0.558493	0.727184	2	0.642838	0.119283	0.0119814		0.22144	0.252845	2	0.237142	0.0222062	0.066727
12661	P25444;D3YVC1;D3YWJ3;L7N240;J3QMG5;F6YTZ4;E9Q1N8;J3QM94;L7N453	252;252;252;180;252;234;231;236;246	T	P25444	T252	40S ribosomal protein S2	Rps2;Gm6139;Gm5786;Gm6576;Gm18025;Gm5070;Gm4968	AKATFDAISKTYSYLTPDLWKETVFTKSPYQ	TYSYLT(1)PDLWK	T(-72.5)Y(-102.87)S(-59.44)Y(-85.09)LT(59.44)PDLWK	6	1.74871e-06	135.02	2	733.834	-0.060439	+	0.522705	0.64193	0.528019	3	0.564218	0.0673529	0.0194188	0.203516	0.247703	0.270422	3	0.240547	0.0340224	0.066727
7045	Q62523	336	S	Q62523	S336	Zyxin	Zyx	QHPQPPPAQNQNQVRSPGGPGPLTLKEVEEL	QHPQPPPAQNQNQVRS(1)PGGPGPLTLK	QHPQPPPAQNQNQVRS(40.53)PGGPGPLT(-40.53)LK	16	2.27948e-05	96.016	4	706.607	-1.6536	+	0.515172	0.483116	0.548198	3	0.515495	0.0325421	0.0230765	0.189337	0.219087	0.31348	3	0.240635	0.0648157	0.066727
1961	E9PYT0;P97393	765;765	S	E9PYT0	S765	Rho GTPase-activating protein 5	Arhgap5	LRGVLESVKHNLDVVSPVPINKDVSEADLRI	HNLDVVS(1)PVPINK	HNLDVVS(104.16)PVPINK	7	0.000160532	104.16	2	756.385	-0.19071	+	0.552242	0.497317	0.424604	3	0.491388	0.0640252	0.0298851	0.205268	0.213411	0.295069	3	0.237916	0.0496631	0.066727
11098	Q9R0L6;Q9R0L6-2	988;1027	S	Q9R0L6	S988	Pericentriolar material 1 protein	Pcm1	ISMQRQENLRWVSELSYIEEKEQWQEQINQL	WVSELS(1)YIEEK	WVS(-57.75)ELS(57.75)Y(-59.14)IEEK	6	8.00391e-38	173.25	2	731.829	1.9594	+	0.143764	0.307795	0.644606	3	0.365388	0.25534	0.0981725	0.176584	0.195152	0.578939	3	0.316892	0.227129	0.066727
6773	Q61165	727	S	Q61165	S727	Sodium/hydrogen exchanger 1	Slc9a1	YEPKADLPVITIDPASPQSPESVDLVNEELK	ADLPVITIDPAS(0.999)PQSPESVDLVNEELK	ADLPVIT(-34.3)IDPAS(34.3)PQS(-38.21)PES(-55.89)VDLVNEELK	12	2.49352e-56	148.49	3	986.153	-0.2812	+	0.290458	0.344215	0.263444	3	0.299372	0.0411169	0.10148	0.211047	0.19078	0.315828	3	0.239218	0.0671155	0.066727
10423	Q9D1F5	210	S	Q9D1F5	S210	UPF0544 protein C5orf45 homolog		ANHTRELGFPRWKLPSPVTQVNAPSSKWARF	WKLPS(1)PVTQVNAPSSK	WKLPS(44.04)PVT(-44.04)QVNAPS(-80.24)S(-83.28)K	5	0.000671568	92.289	3	606.977	1.5122	+	0.0879233	0.285107	0.429434	3	0.267488	0.171436	0.158555	0.167683	0.214764	0.44336	3	0.275269	0.147462	0.066727
1109	B9EJ86	14	S	B9EJ86	S14	Oxysterol-binding protein	Osbpl8	__MEAALADGEPDRSSLLGDSKDVLGPSTVV	MEAALADGEPDRS(0.176)S(0.823)LLGDS(0.001)K	MEAALADGEPDRS(-6.7)S(6.7)LLGDS(-28.88)K	14	8.49125e-07	124.08	3	728.656	-0.35921	+	0.814268	-0.123915		2	0.345176	0.663395	0.938393	0.427082	0.151094		2	0.289088	0.195153	0.066727
3992	Q8CGI1;M0QWZ1	648;934	S	Q8CGI1	S648	Protein FAM193A	Fam193a	QSSSSQFKVSSRRPPSIGDVFHGLNKEDHRH	RPPS(1)IGDVFHGLNK	RPPS(52.86)IGDVFHGLNK	4	0.00217924	78.078	3	539.603	1.1878	+	0.742387	0.76934	0.875463	3	0.79573	0.0703535	0.00473229	0.225622	0.170819	0.322703	3	0.239715	0.0769167	0.0681353
5695	Q3LR78;Q8BW71	748;748	S	Q3LR78	S748		Zbtb38	SLTNSNHKSPSQPVVSPSLIKDSKPETDKAS	SPSQPVVS(0.937)PS(0.063)LIK	S(-57.83)PS(-37.02)QPVVS(11.73)PS(-11.73)LIK	8	0.000927918	87.411	2	709.868	-0.42563	+	0.204825	0.378961	0.375594	3	0.319793	0.0995796	0.0895589	0.271451	0.299551	0.208162	3	0.259721	0.04681	0.0681353
10641	Q9DBR7;Q9DBR7-2	507;507	S	Q9DBR7	S507	Protein phosphatase 1 regulatory subunit 12A	Ppp1r12a	TRLAYVTPTIPRRLASTSDIEEKENRESSSL	RLAS(0.956)T(0.034)S(0.01)DIEEK	RLAS(14.52)T(-14.52)S(-19.8)DIEEK	4	0.000122936	108.36	2	664.808	1.5927	+	0.735399	0.881504	0.927824	3	0.848242	0.100432	0.00367167	0.195009	0.205177	0.302893	3	0.23436	0.0595687	0.068237
1151	D3Z194;D3YTT6;Q9DBS9;F8WH20	371;371;340;340	S	D3Z194;Q9DBS9	S371	Oxysterol-binding protein;Oxysterol-binding protein-related protein 3	Osbpl3	EREKLKQLMELDTSPSPSAQVVGLKHALSSA;EREKLKQLMELDTSPSPSAQVVGLKHALSSE	QLMELDT(0.001)S(0.002)PS(0.995)PS(0.002)AQVVGLK	QLMELDT(-32.25)S(-27.28)PS(26.33)PS(-26.33)AQVVGLK	10	0	254.68	3	699.338	-1.1876	+	0.413467	0.576065	0.590693	3	0.526742	0.0983706	0.0229732	0.20403	0.250761	0.259685	3	0.238159	0.0298914	0.068237
5062	P54728	160	S	P54728	S160	UV excision repair protein RAD23 homolog B	Rad23b	PEKPAEKPAQTPVLTSPAPADSTPGDSSRSN	PAQTPVLT(0.006)S(0.994)PAPADSTPGDSSR	PAQT(-49.08)PVLT(-22.39)S(22.39)PAPADS(-44.21)T(-45.43)PGDS(-52.58)S(-52.58)R	9	1.79799e-81	177.8	3	744.678	0.023921	+	0.644586	0.53447	0.375873	3	0.51831	0.135084	0.0304126	0.153632	0.332862	0.312061	3	0.266185	0.0980272	0.068237
12590	P09405	306	T	P09405	T306	Nucleolin	Ncl	EAPEAKKQKVEGSEPTTPFNLFIGNLNPNKS	VEGSEPT(0.841)T(0.159)PFNLFIGNLNPNK	VEGS(-37.41)EPT(7.24)T(-7.24)PFNLFIGNLNPNK	7	3.76041e-105	193.41	3	790.046	-0.26211	+	0.689238	0.443044	0.546376	3	0.559553	0.123625	0.0208211	0.208653	0.198135	0.286854	3	0.231214	0.0484719	0.0683209
13515	Q80WJ7;E9PUX0	96;96	T	Q80WJ7	T96	Protein LYRIC	Mtdh	KRRSPPRKREEAAPPTPAPDDLAQLKNLRSE	KREEAAPPT(1)PAPDDLAQLK	KREEAAPPT(99.1)PAPDDLAQLK	9	7.22923e-05	118.05	3	709.688	-1.0064	+	0.458547	0.452752	0.248875	3	0.386725	0.119417	0.0696483	0.225425	0.242666	0.239253	3	0.235781	0.0091299	0.0683209
4682	P28867;Q1MX43;Q1MX42;P28867-2	652;537;563;678	S	P28867	S652	Protein kinase C delta type;Protein kinase C delta type regulatory subunit;Protein kinase C delta type catalytic subunit	Prkcd	NEKPQLSFSDKNLIDSMDQEAFHGFSFVNPK	NLIDS(1)MDQEAFHGFSFVNPK	NLIDS(91.69)MDQEAFHGFS(-91.69)FVNPK	5	1.5052e-16	131.27	3	792.684	-1.1338	+	0.385034	0.364757	0.342237	3	0.364009	0.0214084	0.0631146	0.186226	0.1869	0.356745	3	0.24329	0.0982552	0.0685335
1673	Q7TPH6;F6SMY7;Q7TPH6-2;E9PUJ6;F7CZG3	3124;3052;3124;3162;763	S	Q7TPH6	S3124	Probable E3 ubiquitin-protein ligase MYCBP2	Mycbp2	QPPTEEKEIKLKNRHSLEISSALNMFNIAPH	NRHS(0.999)LEISSALNMFNIAPHGPDISK	NRHS(34.22)LEIS(-34.22)S(-37.03)ALNMFNIAPHGPDIS(-92.41)K	4	9.76236e-12	105.22	4	707.844	1.6823	+	0.612773	0.54078	0.656414	3	0.603322	0.0583936	0.0136328	0.225213	0.241048	0.238463	3	0.234908	0.00849505	0.0689143
1182	Q8BZH4;D3YUW8;D3YUX1;Q0VGT3	742;647;689;733	S	Q8BZH4	S742	Pogo transposable element with ZNF domain	Pogz	PPVQRNIQKRAVRKMSVMGRQTCLECSFEIP	KMS(1)VMGR	KMS(60.17)VMGR	3	0.0162569	72.243	3	296.799	-0.47703	+	0.621291	0.536066	0.773581	3	0.643646	0.120325	0.0119814	0.198864	0.235806	0.265889	3	0.23352	0.0335708	0.0692968
3204	Q61194;Q61194-2;F8VPL2	1553;1525;1553	S	Q61194	S1553	Phosphatidylinositol 4-phosphate 3-kinase C2 domain-containing subunit alpha	Pik3c2a	EKAEGIARSAGAVPFSPTLGQIGGAVKLSVS	SAGAVPFS(0.893)PT(0.107)LGQIGGAVK	S(-48.66)AGAVPFS(9.2)PT(-9.2)LGQIGGAVK	8	7.21874e-10	118.5	2	918.966	0.39945	+	0.599577	0.648721	0.446554	3	0.564951	0.105438	0.0216805	0.186819	0.227115	0.283963	3	0.232633	0.0488064	0.0704298
1874	E9Q4Y2;E9PWW9	396;381	S	E9Q4Y2	S396		Rsf1	DQQAKIPLKKREIKLSDDFDSPVKGPLCKSA	EIKLS(1)DDFDSPVK	EIKLS(68.09)DDFDS(-68.09)PVK	5	0.0086059	105.53	3	524.911	0.91759	+	0.398409	0.723915		2	0.561162	0.230168	0.0229732	0.312658	0.160859		2	0.236758	0.107339	0.0704298
7040	Q62481	102	S	Q62481	S102	Vacuolar protein sorting-associated protein 72 homolog	Vps72	KAYKEPLKSLRPRKVSTPASSSQKAREEKTL	KVS(0.961)T(0.039)PASSSQK	KVS(13.97)T(-13.97)PAS(-44.78)S(-54)S(-60.62)QK	3	0.000130654	121.18	2	600.287	-1.9759	+	0.479719	0.435191	0.638877	3	0.517929	0.107084	0.0236844	0.167785	0.259092	0.290188	3	0.239021	0.0636216	0.0704298
692	D6RG65;A6H630-4;A6H630-2;A6H630	4;4;4;4	S	D6RG65	S4	UPF0364 protein C6orf211 homolog	1700052N19Rik	____________MAESPAFLSAKDEGSFAYL	AES(1)PAFLSAKDEGSFAYLTIK	AES(60.73)PAFLS(-60.73)AKDEGS(-101.12)FAY(-118.59)LT(-137.94)IK	3	3.11112e-17	148.2	3	789.71	0.21353	+	-0.0115302		0.513074	2	0.250772	0.370951	0.597715	0.164005		0.617695	2	0.39085	0.320807	0.0704298
8625	Q8BUM3	93	S	Q8BUM3	S93	Tyrosine-protein phosphatase non-receptor type 7	Ptpn7	AGHPLTRWTLQHQPPSPKQLEEEFLKIPSNF	WTLQHQPPS(1)PK	WT(-90.84)LQHQPPS(90.84)PK	9	5.8011e-16	154.46	2	699.832	-2.4358	+	0.133028	0.250981	0.474851	3	0.286287	0.173625	0.129111	0.207713	0.172428	0.312935	3	0.231025	0.0730969	0.0719003
12116	Q9D1F4;E9QKI5;E9QKI4	247;273;318	T	Q9D1F4	T247	Proline-rich AKT1 substrate 1	Akt1s1	EDTQVFGDLPRPRLNTSDFQKLKRKY_____	LNT(0.999)S(0.001)DFQK	LNT(32.39)S(-32.39)DFQK	3	0.00376796	120.03	2	516.724	-0.52514	+	0.82996	0.792111	0.877391	3	0.833154	0.0427294	0.00367167	0.219164	0.236839	0.235249	3	0.230418	0.00977786	0.0726268
4917	P48678	633	S	P48678	S633	Prelamin-A/C;Lamin-A/C	Lmna	ASSVTVTRSFRSVGGSGGGSFGDNLVTRSYL	SVGGS(1)GGGSFGDNLVTR	S(-43.56)VGGS(43.56)GGGS(-45.97)FGDNLVT(-81.79)R	5	0.000258819	99.964	2	823.862	-1.4315	+	0.0103	0.068594		2	0.039447	0.0412201	0.927498	0.213171	0.201616		2	0.207393	0.00817058	0.0731045
6727	Q61037-6;Q7TT21;Q61037;Q61037-4;Q61037-3;Q61037-2;Q61037-5	1777;1733;1805;1761;1766;1768;1782	S	Q61037-6	S1777	Tuberin	Tsc2	EATPTYETGQRKRLISSVDDFTEFV______	RLIS(0.985)S(0.015)VDDFTEFV	RLIS(18.06)S(-18.06)VDDFT(-59.5)EFV	4	2.70778e-18	162.76	2	804.371	1.9781	+	1.08167	0.816877	0.931258	3	0.943269	0.132805	0.00260599	0.205547	0.16776	0.310851	3	0.228053	0.0741527	0.0752247
679	O88573;B1AVP1;A3KMF4;E9Q921	330;338;330;338	S	O88573	S330	AF4/FMR2 family member 1	Aff1	VPAKAKLTRLRMPSQSVEQPYSNEVHCVEEI	LRMPS(0.095)QS(0.896)VEQPY(0.006)S(0.003)NEVHCVEEILK	LRMPS(-9.75)QS(9.75)VEQPY(-21.67)S(-24.75)NEVHCVEEILK	7	0.00239649	60.761	4	738.846	1.0443	+		0.830736	0.831679	2	0.831208	0.000666905	0.00367167		0.150142	0.31273	2	0.231436	0.114967	0.0752247
1564	Q3URD3;F8WIH0;D3Z7V3;Q3URD3-2;H7BX64	148;27;148;148;148	S	Q3URD3	S148	Sarcolemmal membrane-associated protein	Slmap	MEARLRSDVIHAPLPSPVDKVAANTPSMYSQ	LRSDVIHAPLPS(1)PVDK	LRS(-89)DVIHAPLPS(89)PVDK	12	0.000244331	110.64	3	608.652	0.31989	+	0.769776	0.734456	0.858582	3	0.787604	0.0639546	0.00474248	0.161208	0.222976	0.305009	3	0.229731	0.0721382	0.0752247
9393	Q8R080	73	S	Q8R080	S73	G2 and S phase-expressed protein 1	Gtse1	PGQPLAPGSGSPCTLSPLTGEKFVEVYKEAH	RVPGQPLAPGSGSPCT(0.007)LS(0.975)PLT(0.019)GEK	RVPGQPLAPGS(-44.71)GS(-44.71)PCT(-21.66)LS(17.16)PLT(-17.16)GEK	18	2.15676e-24	145.42	4	622.308	-1.6824	+	0.687538	0.543832	0.677967	3	0.636446	0.0803482	0.0122671	0.175269	0.219401	0.280412	3	0.225027	0.0527967	0.0752247
678	O88573;B1AVP1;A3KMF4;E9Q921	328;336;328;336	S	O88573	S328	AF4/FMR2 family member 1	Aff1	LKVPAKAKLTRLRMPSQSVEQPYSNEVHCVE	LRMPS(0.988)QS(0.012)VEQPYSNEVHCVEEILK	LRMPS(18.99)QS(-18.99)VEQPY(-53.71)S(-57.96)NEVHCVEEILK	5	8.63521e-06	94.707	4	738.846	0.69209	+	0.618895	0.545295	0.719763	3	0.627984	0.0875887	0.0126067	0.209412	0.188507	0.264569	3	0.220829	0.0392953	0.0752247
2454	Q8BMG1;I6L9G2;E9Q6L5	14;14;14	S	Q8BMG1	S14	ATR-interacting protein	Atrip	__MAGTPAPNSHRKQSGGLEPFPGLSRSIEN	KQS(1)GGLEPFPGLSR	KQS(70.14)GGLEPFPGLS(-70.14)R	3	0.0028538	76.526	3	518.255	-1.933	+	0.435733	0.557748	0.700558	3	0.56468	0.132549	0.0204947	0.258415	0.139816	0.327117	3	0.241783	0.0947519	0.0752247
2829	E9QLQ3;Q61409	536;536	S	E9QLQ3	S536	cGMP-inhibited 3',5'-cyclic phosphodiesterase B	Pde3b	DFLTKPNIILHRSLGSVSSAADFHQYLRNSD	S(0.046)LGS(0.952)VS(0.001)S(0.001)AADFHQYLR	S(-13.17)LGS(13.17)VS(-30.16)S(-30.16)AADFHQY(-98.51)LR	4	9.06265e-07	127.53	3	606.612	-0.79648	+	0.610383	0.623394	0.413255	3	0.549011	0.117748	0.0245729	0.188378	0.273834	0.235764	3	0.232659	0.0428127	0.0752247
9827	Q91YR1	143	S	Q91YR1	S143	Twinfilin-1	Twf1	DVSLHGYKKYLLSQSSPAPLTAAEEELRQIK	KYLLS(0.001)QS(0.053)S(0.931)PAPLT(0.015)AAEEELRQIK	KY(-39.68)LLS(-29.62)QS(-12.48)S(12.48)PAPLT(-17.85)AAEEELRQIK	8	2.38387e-18	146.28	4	663.847	2.7587	+	0.380663	0.423705	0.554271	3	0.45288	0.0904064	0.033174	0.220526	0.165393	0.296013	3	0.22731	0.0655737	0.0752247
4464	P13439	51	S	P13439	S51	Uridine 5'-monophosphate synthase;Orotate phosphoribosyltransferase;Orotidine 5'-phosphate decarboxylase	Umps	VYIDLRGIVSRPRLLSQVADILFQTAKNAGI	LLS(1)QVADILFQTAK	LLS(70.54)QVADILFQT(-70.54)AK	3	0.00109823	77.871	3	542.955	1.6068	+	0.299333	0.403789		2	0.351561	0.0738619	0.0608164	0.168546	0.289411		2	0.228978	0.085464	0.0752247
3241	Q8VI36;Q8VI36-2;F8VQ28	83;83;83	S	Q8VI36	S83	Paxillin	Pxn	QWQPSGSRYAHQQPPSPLPVYSSSAKNSSAS	YAHQQPPS(1)PLPVYSSSAK	Y(-54.18)AHQQPPS(54.18)PLPVY(-55.92)S(-63.77)S(-67.98)S(-76.14)AK	8	4.42473e-07	120.25	3	679.654	-0.43851	+	0.267148	0.364288	0.385282	3	0.338906	0.0630245	0.0737955	0.173277	0.216641	0.29335	3	0.227756	0.0608033	0.0752247
14216	Q9DBG5	433	T	Q9DBG5	T433	Perilipin-3	Plin3	AMWLVGPFAPGITEKTPEGK___________	EALDNTVEYVAQNTPAMWLVGPFAPGIT(0.223)EKT(0.777)PEGK	EALDNT(-74.03)VEY(-75.35)VAQNT(-60.72)PAMWLVGPFAPGIT(-5.42)EKT(5.42)PEGK	31	3.95696e-08	78.274	4	964.215	0.37495	+	0.230602	0.355126		2	0.292864	0.0880514	0.0948965	0.164259	0.319543		2	0.241901	0.109803	0.0752247
1230	D3YX49;E9QAR4;E9QAR1;E9QAR6;E9Q1A5	180;235;266;219;235	S	D3YX49	S180		Zfp384	DDHQKDGKTYRCRMCSLTFYSKSEMQIHSKS	MCS(1)LT(1)FYSK	MCS(50.24)LT(35.87)FY(-35.87)S(-56.73)K	3	0.000175979	118.77	2	648.726	1.7948	+	0.189209	0.11757	0.375553	3	0.227444	0.133174	0.190952	0.383178	0.117967	0.348325	3	0.283157	0.144116	0.0752247
7342	Q6NZF1	289	S	Q6NZF1	S289	Zinc finger CCCH domain-containing protein 11A	Zc3h11a	LVRLSLSERLGKRKLSVGGDSDPPLKRSLAQ	RKLS(1)VGGDSDPPLK	RKLS(44.34)VGGDS(-44.34)DPPLK	4	0.0162851	84.195	3	516.931	-1.0747	+	0.59005	0.574876	0.638121	3	0.601016	0.0330178	0.0136328	0.155243	0.229733	0.301691	3	0.228889	0.0732273	0.076653
5873	Q3U1F9	293	S	Q3U1F9	S293	Phosphoprotein associated with glycosphingolipid-enriched microdomains 1	Pag1	EQAAEGTGGHSKRFSSLSYKSREEDPTLTEE	RFS(0.011)S(0.989)LSYK	RFS(-19.55)S(19.55)LS(-51.8)Y(-85.3)K	4	0.00567562	98.754	3	356.502	0.023662	+	0.494322	0.458698	0.508919	3	0.487313	0.0258334	0.0260963	0.17309	0.254814	0.253241	3	0.227048	0.046736	0.076653
5097	P57725;D3Z0Y1;P59808;F8VQK5	177;306;561;561	S	P57725	S177	SAM domain-containing protein SAMSN-1;SAM and SH3 domain-containing protein 1	Samsn1;Sash1	GPFCGRAKVHTDFTPSPYDTDSLKIKKGDII	VHTDFTPS(1)PYDTDSLK	VHT(-91.43)DFT(-37.1)PS(37.1)PY(-82.03)DT(-50.4)DS(-61.06)LK	8	2.12808e-70	181.64	2	951.912	0.67795	+	0.457382	0.433386	0.431306	3	0.440691	0.0144922	0.0364373	0.22636	0.234289	0.219013	3	0.226554	0.00763988	0.076653
8817	Q8C129	379	S	Q8C129	S379	Leucyl-cystinyl aminopeptidase	Lnpep	GEMRNLSQDVNGTLVSVYAVPEKIGQVHHAL	NLS(0.001)QDVNGT(0.068)LVS(0.883)VY(0.048)AVPEK	NLS(-31.36)QDVNGT(-11.13)LVS(11.13)VY(-12.66)AVPEK	12	0.016318	48.288	3	705.012	2.0553	+	0.264865	0.247851		2	0.256358	0.012031	0.115313	0.163644	0.307218		2	0.235431	0.101522	0.076653
3004	Q68FD7;F6RJ64	272;248	S	Q68FD7	S272	Folliculin-interacting protein 1	Fnip1	ARSASLSSLFITPFPSPNSSLTRSCASSYQR	SASLSSLFIT(0.001)PFPS(0.969)PNS(0.021)S(0.005)LT(0.005)R	S(-132.85)AS(-132.85)LS(-111.41)S(-100.52)LFIT(-32.81)PFPS(16.56)PNS(-16.56)S(-23.24)LT(-23.24)R	14	2.60752e-54	165.66	2	1145.06	3.3533	+		0.0987475	-0.0406814	2	0.029033	0.0985912	0.950473		0.17269	0.26532	2	0.219005	0.0654991	0.076653
14507	P05213;Q3UX10;P68368;P68373;Q9JJZ2	399;406;399;399;399	Y	P05213;P68368;P68373;Q9JJZ2	Y399	Tubulin alpha-1B chain;Tubulin alpha chain-like 3;Tubulin alpha-4A chain;Tubulin alpha-1C chain;Tubulin alpha-8 chain	Tuba1b;Tubal3;Tuba4a;Tuba1c;Tuba8	IAEAWARLDHKFDLMYAKRAFVHWYVGEGME	LDHKFDLMY(1)AK	LDHKFDLMY(81.52)AK	9	0.00696025	81.525	3	487.56	1.71	+	0.122412	0.135355		2	0.128884	0.00915195	0.325187	0.26072	0.161068		2	0.210894	0.0704646	0.0782216
657	Q66JQ7;A3KGI3;A3KGI5;A3KGI6	60;60;60;60	S	Q66JQ7	S60	Protein CASC5	Casc5	QEPNPPRKRKSSRRVSFADTIKVFQTESHMK	RVS(1)FADTIK	RVS(65.39)FADT(-65.39)IK	3	7.92976e-05	136.01	3	372.853	-0.45125	+	0.382989	0.353935	0.471572	3	0.402832	0.0612772	0.0452176	0.19582	0.216351	0.242612	3	0.218261	0.0234543	0.0784098
3615	G3X9Z4;F6UFZ5	777;700	S	G3X9Z4	S777		Pcf11	RDGPAKMIFEGPNKLSPRIDGPPTPGSLRFD	MIFEGPNKLS(1)PR	MIFEGPNKLS(62.69)PR	10	0.00548919	81.448	3	490.239	-0.98761	+	0.303131	0.300835	0.61434	3	0.406102	0.180343	0.054767	0.202989	0.142296	0.432868	3	0.259384	0.153275	0.0784098
6025	Q3UHD9;Q3UHD9-2	921;901	S	Q3UHD9	S921	Arf-GAP with GTPase, ANK repeat and PH domain-containing protein 2	Agap2	SLQCCESSKVKLRTDSQSEAVAIQAIRNAKG	LRT(0.003)DS(0.995)QS(0.001)EAVAIQAIR	LRT(-24.55)DS(24.55)QS(-28.88)EAVAIQAIR	5	5.68943e-07	145.88	2	919.462	-1.2753	+	1.01824	0.646266	0.806236	3	0.823582	0.186594	0.00484222	0.21808	0.18327	0.241277	3	0.214209	0.0291968	0.0797889
749	Q8BPN8;F6RYL8;Q8BPN8-2;B0V2P5	2192;1394;2192;2192	S	Q8BPN8	S2192	DmX-like protein 2	Dmxl2	LLQESQQETTVKQLQSPLPLPTTLPLLSASI	QLQS(1)PLPLPTTLPLLSASIASTK	QLQS(37.3)PLPLPT(-38.72)T(-37.3)LPLLS(-60.7)AS(-68.97)IAS(-86.28)T(-89.76)K	4	1.49989e-15	116.99	3	819.452	3.2727	+	0.608344	0.600722	0.567127	3	0.592064	0.0219303	0.0149396	0.22987	0.131522	0.372061	3	0.244484	0.120933	0.0797889
14252	Q9EQQ9;Q9EQQ9-3	709;747	T	Q9EQQ9	T709	Bifunctional protein NCOAT;Protein O-GlcNAcase;Histone acetyltransferase	Mgea5	PIDGANDLFFQPPPLTPTSKVYTIRPYFPKD	LLPIDGANDLFFQPPPLT(0.949)PT(0.04)S(0.011)K	LLPIDGANDLFFQPPPLT(13.74)PT(-13.74)S(-19.33)K	18	9.46933e-42	148.06	3	821.085	0.87134	+	0.590742	0.62298	0.540442	3	0.584721	0.0415974	0.0158813	0.21085	0.253096	0.212547	3	0.225497	0.0239159	0.0797889
4498	P15066	253	S	P15066	S253	Transcription factor jun-D	Jund	QTVPDVPSFGDSPPLSPIDMDTQERIKAERK	LAALKDEPQTVPDVPS(0.014)FGDS(0.987)PPLS(0.998)PIDMDT(0.001)QERIK	LAALKDEPQT(-48.86)VPDVPS(-18.94)FGDS(18.94)PPLS(29.47)PIDMDT(-29.47)QERIK	24	5.04711e-12	104.54	5	794.175	-0.87854	+	0.36487	0.498104	0.258785	3	0.37392	0.119916	0.0725609	0.252829	0.179581	0.227781	3	0.220064	0.0372291	0.0797889
3211	F8VPP8	342	S	F8VPP8	S342		Zc3h7b	DPSRKLAASVLDALDSPGPTLDPLDLLPYSE	LAASVLDALDS(0.996)PGPT(0.004)LDPLDLLPYSEAR	LAAS(-39.66)VLDALDS(23.96)PGPT(-23.96)LDPLDLLPY(-54.37)S(-54.02)EAR	11	8.42523e-07	76.423	2	1495.24	-1.5096	+	0.478725	0.783518		2	0.631121	0.215521	0.0149396	0.181754	0.223911		2	0.202833	0.0298093	0.080159
7261	Q6GQX2	436	S	Q6GQX2	S436	Nck-associated protein 5-like	Nckap5l	HSSSQVKSKLQIGPPSPGDAQGPLLPSPARG	LQIGPPS(1)PGDAQGPLLPSPAR	LQIGPPS(77.93)PGDAQGPLLPS(-77.93)PAR	7	5.09759e-05	85.61	3	716.7	1.3975	+		0.396269	0.305474	2	0.350871	0.064202	0.0769746		0.192289	0.233015	2	0.212652	0.0287978	0.080159
14186	Q9D6Z1;A2APD7	564;280	T	Q9D6Z1	T564	Nucleolar protein 56	Nop56	KKRKFSEEPEVAANFTKSSTKKKKKSQKAQE	RKFS(0.008)EEPEVAANFT(0.992)K	RKFS(-20.89)EEPEVAANFT(20.89)K	14	7.9235e-09	159.5	2	916.933	1.0394	+	0.510974	0.621623	0.55117	3	0.561256	0.0560098	0.0194264	0.255097	0.146469	0.274897	3	0.225488	0.0691446	0.0805914
9391	Q8R080	66	S	Q8R080	S66	G2 and S phase-expressed protein 1	Gtse1	LDLNRRVPGQPLAPGSGSPCTLSPLTGEKFV	RVPGQPLAPGS(0.997)GS(0.003)PCT(0.115)LS(0.869)PLT(0.017)GEK	RVPGQPLAPGS(25.68)GS(-25.68)PCT(-8.79)LS(8.79)PLT(-17.16)GEK	11	1.12077e-21	145.42	3	856.064	0.83397	+	0.369976	0.494391	0.34327	3	0.402546	0.0806537	0.0512432	0.250906	0.210345	0.205833	3	0.222361	0.0248229	0.0808068
6452	Q5I1X5;D3YXE7;D3Z5Q5;D3YVH2	81;81;81;81	S	Q5I1X5	S81	RelA-associated inhibitor	Ppp1r13l	RMARYSTSPVPEHFGSRGSPQKIATDGIEAR	YSTSPVPEHFGS(0.818)RGS(0.182)PQK	Y(-45.32)S(-45)T(-45)S(-43.08)PVPEHFGS(6.52)RGS(-6.52)PQK	12	0.00803451	70.501	4	510.985	-0.1289	+	0.312981	0.408121	0.150292	3	0.290465	0.130381	0.13476	0.183765	0.219558	0.244834	3	0.216053	0.0306851	0.0808068
610	A2BH40;A2BH40-3;E9QAQ7;A2BH40-4;A2BH40-2	1927;1710;1931;1546;1547	S	A2BH40	S1927	AT-rich interactive domain-containing protein 1A	Arid1a	MLSTRSSTLTDEGAKSAEATKESSKFPFGIS	S(0.001)S(0.001)T(0.001)LT(0.038)DEGAKS(0.958)AEATK	S(-28.24)S(-28.24)T(-28.24)LT(-14.03)DEGAKS(14.03)AEAT(-35.5)K	11	0.00477149	80.733	2	838.375	-0.53815	+	0.440342	0.452017	0.562884	3	0.485081	0.0676317	0.0271812	0.193874	0.248219	0.221538	3	0.22121	0.0271736	0.0820067
9805	Q91YD3	246	S	Q91YD3	S246	mRNA-decapping enzyme 1A	Dcp1a	PSGHKHLTVEELFGTSLPKEQPTAMGLESED	HLTVEELFGT(0.013)S(0.987)LPK	HLT(-98.01)VEELFGT(-18.66)S(18.66)LPK	11	5.91928e-05	115.37	3	550.943	-1.3816	+	0.470602	0.511375	0.426687	3	0.469555	0.0423537	0.0323879	0.169912	0.163012	0.352304	3	0.228409	0.107351	0.0820067
5149	P59672;P59672-2;Q3UHP6	461;440;461	S	P59672	S461	Ankyrin repeat and SAM domain-containing protein 1A	Anks1a;Anks1	PLAASEGLAVRPRIQSSAPQEEEEHPYELLL	IQS(0.982)S(0.018)APQEEEEHPYELLLTAETK	IQS(17.26)S(-17.26)APQEEEEHPY(-83.05)ELLLT(-90.46)AET(-102)K	3	6.12991e-17	108.22	3	908.088	0.82989	+	0.823109	0.889918	0.869698	3	0.860908	0.0342608	0.00329304	0.211966	0.150449	0.282371	3	0.214929	0.0660107	0.082142
5047	P54227;D3Z1Z8;D3Z5N2	25;25;25	S	P54227	S25	Stathmin	Stmn1	ELEKRASGQAFELILSPRSKESVPDFPLSPP	RASGQAFELILS(1)PR	RAS(-78.94)GQAFELILS(78.94)PR	12	2.05647e-133	229.22	3	542.278	-0.79811	+	0.655359	0.633872	0.641608	3	0.643613	0.010883	0.0115588	0.223204	0.2399	0.203231	3	0.222112	0.0183586	0.082142
13016	Q3U6N9;Q3U6N9-2;Q3U6N9-3	208;145;146	T	Q3U6N9	T208	UPF0488 protein C8orf33 homolog		KSGRVCRPRPAERAKTTPDLTSEEFRFNFF_	AKT(0.96)T(0.04)PDLTSEEFR	AKT(13.77)T(-13.77)PDLT(-67.11)S(-71.03)EEFR	3	8.65108e-05	130.66	3	525.575	-0.62909	+	0.569187	0.694667	0.621075	3	0.62831	0.063052	0.0122671	0.360105	0.266984	0.169475	3	0.265522	0.0953233	0.082142
1119	B9EKS2;Q6ZPY7;Q6ZPY7-2	799;599;599	S	B9EKS2	S799	Lysine-specific demethylase 3B	Kdm3b	FAQENKAPFEAVKRFSLDERSLACRQDSDSS	RFS(1)LDER	RFS(86.34)LDER	3	0.00872274	86.344	3	334.818	-0.30422	+	0.496016	0.467534	0.629672	3	0.531074	0.0865678	0.0227814	0.258415	0.139344	0.2757	3	0.224486	0.0742402	0.082142
6673	Q60848;Q60848-2	498;485	S	Q60848	S498	Lymphocyte-specific helicase	Hells	VELSPTGRPKRRSRKSINYSELDQFPSELEK	S(1)INYSELDQFPSELEK	S(61.11)INY(-73.82)S(-61.11)ELDQFPS(-139.37)ELEK	1	0	325.01	2	989.938	0.25624	+	0.390122	0.410828	0.45225	3	0.417733	0.0316342	0.0412961	0.167849	0.18307	0.290221	3	0.213714	0.0666934	0.082142
3421	Q6Y7W8;G3UWR2;G3UYR9;G3UYG6;E9Q2M5	30;30;30;30;30	S	Q6Y7W8	S30	PERQ amino acid-rich with GYF domain-containing protein 2	Gigyf2	LRALSSGGSITSPPLSPALPKYKLADYRYGR	ALSSGGS(0.001)IT(0.931)S(0.067)PPLS(1)PALPK	ALS(-60.69)S(-47.79)GGS(-28.29)IT(11.41)S(-11.41)PPLS(71.89)PALPK	14	4.64978e-88	194.52	2	970.463	-0.69103	+	0.401073	0.427794	0.4212	3	0.416689	0.0139202	0.0433056	0.205407	0.249027	0.206992	3	0.220476	0.024739	0.082142
4342	P04627	456	S	P04627	S456	Serine/threonine-protein kinase A-Raf	Araf	VKIGDFGLATVKTRWSGAQPLEQPSGSVLWM	T(0.239)RWS(0.761)GAQPLEQPSGSVLWMAAEVIR	T(-5.03)RWS(5.03)GAQPLEQPS(-82.24)GS(-71.75)VLWMAAEVIR	4	6.25199e-30	141.92	3	950.465	-1.7671	+	0.478119	0.327625	0.442589	3	0.416111	0.0786636	0.0444928	0.146685	0.221597	0.301473	3	0.223252	0.0774073	0.082142
5677	Q2KN98	869	S	Q2KN98	S869	Cytospin-A	Specc1l	QVPNAAAAAIPRTPLSPSPMKTPPAAAVSPM	SFDSASQVPNAAAAAIPRT(0.02)PLS(0.899)PS(0.081)PMK	S(-105.67)FDS(-99.42)AS(-96.67)QVPNAAAAAIPRT(-16.48)PLS(10.46)PS(-10.46)PMK	22	3.86118e-24	118.98	3	931.121	0.56366	+		0.490141	0.127139	2	0.30864	0.256681	0.188509		0.226033	0.210701	2	0.218367	0.0108407	0.082142
9058	Q8CH77;Q8CH77-3;Q8CH77-4	998;998;604	S	Q8CH77	S998	Neuron navigator 1	Nav1	LSMSLSAKGQLTNIVSPTAATTPRITRSNSI	GQLTNIVS(0.922)PT(0.078)AATTPR	GQLT(-45.42)NIVS(10.74)PT(-10.74)AAT(-52.07)T(-56.32)PR	8	8.837e-101	201.27	2	853.927	0.29757	+	0.469793	0.368863	0.471327	3	0.436661	0.0587198	0.0378208	0.186686	0.19279	0.24987	3	0.209782	0.0348509	0.0829096
4607	P23475	518	S	P23475	S518	X-ray repair cross-complementing protein 6	Xrcc6	DLTLPKVEAIKKRLGSLADEFKELVYPPGYN	RLGS(1)LADEFK	RLGS(87.86)LADEFK	4	0.000277049	108.66	3	405.864	-0.61444	+	0.497192	0.483502	0.500767	3	0.49382	0.00911308	0.0259156	0.229001	0.18876	0.217886	3	0.211882	0.0207814	0.0831964
2249	G3X9A3;E9Q3R9;E9Q444	352;324;352	S	G3X9A3	S352		Zbtb21	YYSKLGLVVPSGGPASANQSIDRSGPLVKSL	LGLVVPSGGPAS(0.984)ANQS(0.016)IDR	LGLVVPS(-54.5)GGPAS(17.79)ANQS(-17.79)IDR	12	9.99216e-40	159.16	2	959.475	-0.41879	+	0.514508	0.75379		2	0.634149	0.169198	0.0136328	0.158885	0.253314		2	0.206099	0.0667715	0.0840481
109	Q8BW72;Q8BW72-2;A2A8L9	570;570;570	S	Q8BW72	S570	Lysine-specific demethylase 4A	Kdm4a	ATGEPSVKKKRSAPRSISEQELAEVADEYML	S(0.209)APRS(0.754)IS(0.037)EQELAEVADEYMLSLEENKK	S(-5.58)APRS(5.58)IS(-13.12)EQELAEVADEY(-86.4)MLS(-98.89)LEENKK	5	3.21508e-82	166.78	4	787.37	-1.727	+	0.272004	0.159687		2	0.215846	0.0794199	0.172535	0.183288	0.198135		2	0.190711	0.0104979	0.0854711
10304	Q9CX66	66	S	Q9CX66	S66	Uncharacterized protein C12orf45 homolog	D10Wsu102e	HPRKTSTLQTVRMQRSPLLDQVQAFLPQMAQ	MQRS(1)PLLDQVQAFLPQMAQANEK	MQRS(83.24)PLLDQVQAFLPQMAQANEK	4	3.64974e-12	117.6	3	908.44	-1.7796	+	0.43889	0.319793	0.480448	3	0.413044	0.0833878	0.0444928	0.321254	0.115178	0.296984	3	0.244472	0.112628	0.0860048
5828	Q3U0B3	197	S	Q3U0B3	S197	Dehydrogenase/reductase SDR family member 11	Dhrs11	QELLEAQTHIRATCISPGLVETQFAFKLHDK	AT(0.005)CIS(0.995)PGLVETQFAFK	AT(-23.07)CIS(23.07)PGLVET(-78.26)QFAFK	5	1.58836e-11	138.55	3	616.958	0.8385	+	0.424751	0.393487	0.515074	3	0.444438	0.0631387	0.0345279	0.235465	0.168203	0.227715	3	0.210461	0.0368013	0.0861327
4716	P31938;Q63932;Q91YS7	222;226;226	S	P31938;Q63932	S222	Dual specificity mitogen-activated protein kinase kinase 1;Dual specificity mitogen-activated protein kinase kinase 2	Map2k1;Map2k2	CDFGVSGQLIDSMANSFVGTRSYMSPERLQG	LCDFGVSGQLIDSMANS(1)FVGTR	LCDFGVS(-158.79)GQLIDS(-79.02)MANS(79.02)FVGT(-79.51)R	17	1.03759e-175	225.69	3	818.699	1.4784	+	0.528544	0.616013	0.594961	3	0.579839	0.0456532	0.0163394	0.136874	0.278342	0.270147	3	0.228454	0.079417	0.0869131
6859	Q61645	3	S	Q61645	S3	Protein hairless	Hr	_____________MESMPSFLKDTPAWEKTA	MES(0.995)MPS(0.005)FLK	MES(23.09)MPS(-23.09)FLK	3	0.00737992	77.288	2	575.24	-0.020158	+		0.413669	0.484206	2	0.448937	0.0498773	0.0343473		0.220265	0.205477	2	0.212871	0.0104566	0.086982
4360	P05627	246	S	P05627	S246	Transcription factor AP-1	Jun	EPQTVPEMPGETPPLSPIDMESQERIKAERK	LQALKEEPQTVPEMPGET(0.003)PPLS(0.995)PIDMES(0.001)QER	LQALKEEPQT(-66.87)VPEMPGET(-24.65)PPLS(24.65)PIDMES(-28.67)QER	22	3.16543e-47	128.85	3	1186.22	-1.1508	+	0.317227	0.403189		2	0.360208	0.0607842	0.0559171	0.222791	0.161757		2	0.192274	0.0431572	0.086982
3044	Q8BX90;F6TLV3	1014;970	S	Q8BX90	S1014	Fibronectin type-III domain-containing protein 3A	Fndc3a	SLYRGPCHTYKVQRLSESTSYKFCIQACNEA	VQRLS(1)ESTSYK	VQRLS(38.78)ES(-40.71)T(-38.78)S(-44.12)Y(-70.32)K	5	2.60645e-05	148.85	3	459.885	1.2052	+	0.123035	0.197777		2	0.160406	0.0528506	0.251628	0.176852	0.20096		2	0.188906	0.0170469	0.086982
11953	E9Q394;E9Q474	487;487	T	E9Q394	T487		Akap13	VGAPEKAGELEHSLLTPDATTQNNKPQVGEG	AGELEHSLLT(1)PDATTQNNKPQVGEGTK	AGELEHS(-39.84)LLT(38.73)PDAT(-38.73)T(-44.77)QNNKPQVGEGT(-57.73)K	10	5.85149e-06	94.359	4	729.6	0.63192	+	0.704176	0.700704	0.5815	3	0.662127	0.0698464	0.0110236	0.168674	0.272909	0.216132	3	0.219238	0.0521866	0.0875505
1838	E9QAH1;E9PVZ8	623;664	S	E9QAH1	S623		Golgb1	ASEAGPLNDAGMELSSPKLDGVDKSLAVSHV	ASEAGPLNDAGMELS(0.125)S(0.875)PKLDGVDK	AS(-119)EAGPLNDAGMELS(-8.47)S(8.47)PKLDGVDK	16	1.58973e-16	133.16	4	621.036	-1.7503	+	0.213704	0.648731	0.567223	3	0.476552	0.231253	0.0472991	0.152292	0.221753	0.263659	3	0.212568	0.0562491	0.0875505
13094	Q9Z1S8;Q3ZB57	388;388	T	Q9Z1S8	T388	GRB2-associated-binding protein 2	Gab2	SENSRSVAATIPRRNTLPAMDNSRLHRASSC	RNT(1)LPAMDNSR	RNT(84.65)LPAMDNS(-84.65)R	3	0.00258929	89.356	3	452.203	1.6714	+	0.23945	0.211201	0.27324	3	0.241297	0.031061	0.14851	0.217234	0.186165	0.216046	3	0.206482	0.0176048	0.0875505
7264	Q6GQX2	760	S	Q6GQX2	S760	Nck-associated protein 5-like	Nckap5l	YSSHSMGARVDLEPISPRSCLTKVELAKSRL	VDLEPIS(1)PR	VDLEPIS(73.36)PR	7	0.000256696	122.46	2	553.268	3.2337	+	0.305803	0.298482	0.378907	3	0.32773	0.0444709	0.0766348	0.225374	0.150726	0.24634	3	0.20748	0.0502561	0.0894749
1468	Q3UPF5;Q3UPF5-2;D3Z5I1	490;490;490	S	Q3UPF5	S490	Zinc finger CCCH-type antiviral protein 1	Zc3hav1	GFSQIMDETPNVSKSSPTGFGIKSAVTGGKE	S(0.031)S(0.968)PT(0.001)GFGIK	S(-14.88)S(14.88)PT(-30.95)GFGIK	2	0.000294768	121.29	2	487.223	-0.27663	+	0.386749	0.324241	0.335913	3	0.348968	0.0332356	0.0690005	0.194778	0.142952	0.295772	3	0.211167	0.0777171	0.0902157
14319	Q9QXK3;Q9QXK3-4	597;597	T	Q9QXK3	T597	Coatomer subunit gamma-2	Copg2	AMAPVFEQKSEITLVTPKPEKLAPSRQDIFQ	S(0.001)EIT(0.007)LVT(0.992)PKPEK	S(-31.95)EIT(-21.28)LVT(21.28)PKPEK	7	0.0141066	73.415	3	474.581	0.10011	+	0.268601	0.293451	0.400991	3	0.321014	0.0703672	0.0842512	0.148986	0.236588	0.253265	3	0.212946	0.056015	0.0902157
602	A2BGG7;P62960	60;172	S	A2BGG7;P62960	S60	Nuclease-sensitive element-binding protein 1	Ybx1	QQNYQNSESGEKNEGSESAPEGQAQQRRPYR	NEGS(1)ES(1)APEGQAQQR	NEGS(139.11)ES(139.11)APEGQAQQR	4	2.57722e-34	162.92	2	874.32	1.2653	+	-0.000678028		0.412356	2	0.205839	0.292059	0.567469	0.319837		0.195683	2	0.25776	0.0877897	0.0902157
5411	P80314	260	S	P80314	S260	T-complex protein 1 subunit beta	Cct2	DTDKIKIFGSRVRVDSTAKVAEIEHAEKEKM	VRVDS(0.973)T(0.027)AK	VRVDS(15.49)T(-15.49)AK	5	0.00150752	112.94	2	478.234	0.90287	+	0.887071	0.999739	0.904447	3	0.930419	0.0606584	0.00260599	0.127791	0.289143	0.278676	3	0.23187	0.0902866	0.09038
7358	Q6NZP1	613	S	Q6NZP1	S613	DNA annealing helicase and endonuclease ZRANB3;DNA annealing helicase ZRANB3;Endonuclease ZRANB3	Zranb3	ATSMEVVHEVKPPLASPALPEKGWQCGFCTF	ATSMEVVHEVKPPLAS(1)PALPEK	AT(-52.05)S(-52.05)MEVVHEVKPPLAS(52.05)PALPEK	16	0.0113268	68.639	4	603.308	1.8747	+		0.523668	0.463858	2	0.493763	0.0422921	0.0277814		0.150603	0.258919	2	0.204761	0.0765913	0.09038
1465	Q3UPF5;Q3UPF5-2;D3Z5I1;G3X9X5	344;344;344;344	S	Q3UPF5	S344	Zinc finger CCCH-type antiviral protein 1	Zc3hav1	EDGDPDGLFSRNRSDSSTSRTSAAGFPLVAA	S(0.16)DS(0.765)S(0.014)T(0.02)S(0.02)RT(0.02)S(0.003)AAGFPLVAAQR	S(-6.79)DS(6.79)S(-17.5)T(-15.92)S(-15.92)RT(-15.92)S(-23.7)AAGFPLVAAQR	3	1.28336e-05	113.42	3	696.995	-2.6453	+	0.530789	0.430188	0.395785	3	0.452254	0.0701547	0.0367501	0.155529	0.235099		2	0.195314	0.0562645	0.09038
8683	Q8BYW1;Q8BYW1-2;Q8BYW1-3	363;274;337	S	Q8BYW1	S363	Rho GTPase-activating protein 25	Arhgap25	RDHEVLFPKSKDAPISPPAQKNDAKKAPVPR	DAPIS(1)PPAQK	DAPIS(76.36)PPAQK	5	0.00505441	82.942	2	552.26	-0.90032	+	0.35253	0.478552	0.448757	3	0.426613	0.0658649	0.0401292	0.195976	0.161518	0.250844	3	0.202779	0.0450498	0.09038
91	A2A7B5	1395	S	A2A7B5	S1395		Prdm2	SGKNAFRRMGQPKRLSFNVELSKMSPNKLKL	RLS(1)FNVELSK	RLS(103.83)FNVELS(-103.83)K	3	0.000269963	120.9	3	424.883	0.20014	+	0.44736	0.560325	0.689795	3	0.565827	0.121311	0.019685	0.126592	0.251322	0.296597	3	0.224837	0.0880425	0.0907686
1667	Q61210-5;E9PUF7;Q61210;Q61210-2	964;961;905;904	S	Q61210-5	S964	Rho guanine nucleotide exchange factor 1	Arhgef1	FCRLRPLLSQLGGTLSPNLAAPERSAQTGLS	LRPLLSQLGGTLS(1)PNLAAPER	LRPLLS(-95.92)QLGGT(-33.07)LS(33.07)PNLAAPER	13	2.29176e-66	189.64	3	761.746	0.73628	+	0.598867	0.545864	0.534454	3	0.559728	0.0343721	0.0188227	0.16476	0.214446	0.229627	3	0.202944	0.0339286	0.0944947
9853	Q91ZM2-6;Q91ZM2;Q91ZM2-5;Q91ZM2-2;Q91ZM2-3;Q91ZM2-4	376;376;376;376;376;376	S	Q91ZM2-6	S376	SH2B adapter protein 1	Sh2b1	ALHVKAWVSDIQECLSPGPCPAISPRPMTLP	AWVS(0.001)DIQECLS(0.979)PGPCPAIS(0.01)PRPMT(0.01)LPLAPGT(0.001)S(0.001)FFTK	AWVS(-31.04)DIQECLS(20.13)PGPCPAIS(-20.13)PRPMT(-20.13)LPLAPGT(-32.54)S(-32.54)FFT(-38.96)K	11	0.00632429	58.891	3	1336.97	1.0889	+	0.957282		0.402382	2	0.679832	0.392374	0.0260963	0.21679		0.223059	2	0.219925	0.00443312	0.0944947
10106	Q99N57;Q99N57-2	29;29	S	Q99N57	S29	RAF proto-oncogene serine/threonine-protein kinase	Raf1	GFGLKDAVFDGSSCISPTIVQQFGYQRRASD	DAVFDGSSCIS(0.992)PT(0.007)IVQQFGYQR	DAVFDGS(-33.08)S(-33.08)CIS(21.44)PT(-21.44)IVQQFGY(-112.3)QR	11	1.50254e-103	183.99	3	852.381	-0.47668	+	0.688793	0.672421	0.670053	3	0.677089	0.010205	0.00906146	0.185393	0.269466	0.193745	3	0.216201	0.0463173	0.0946051
2936	P59328;P59328-3;E9QPB3	1077;1040;1077	S	P59328	S1077	WD repeat and HMG-box DNA-binding protein 1	Wdhd1	TASDGAEAKKRKRVVSEICETENQEETVKEN	VVS(1)EICETENQEETVK	VVS(84.22)EICET(-84.22)ENQEET(-148.42)VK	3	0	332.36	2	987.424	-0.68891	+	0.793371	0.699838	0.54014	3	0.677783	0.128048	0.0112879	0.207727	0.130816	0.292992	3	0.210512	0.0811239	0.0946051
8262	Q9EQ28;Q8BH76	454;453	S	Q9EQ28	S454	DNA polymerase delta subunit 3	Pold3	PKKGAAALGKANRQVSITGFFQKK_______	QVS(0.999)IT(0.001)GFFQKK	QVS(30.73)IT(-30.73)GFFQKK	3	0.000557173	90.476	3	454.899	2.1748	+	0.449926	0.421324	0.603121	3	0.491457	0.0977556	0.0268465	0.199957	0.166489	0.231895	3	0.199447	0.0327058	0.0946051
7881	Q7TT28	487	S	Q7TT28	S487	RNA exonuclease 1 homolog	Rexo1	AKKMSSGKLVERKARSLDEGAPQDTPKLKKR	ARS(1)LDEGAPQDTPK	ARS(74.62)LDEGAPQDT(-74.62)PK	3	0.00168596	91.547	3	522.238	-0.03371	+	0.386677	0.244302		2	0.31549	0.100675	0.0851598	0.176311	0.182158		2	0.179234	0.00413455	0.0961392
11862	P18653;G3UZI3;E9PWV3;Q505N6;F6RQA2;F6Q8A4;Q9WUT3;P18654;B1AXN9	562;463;557;573;574;579;570;577;549	T	P18653;P18654	T562	Ribosomal protein S6 kinase alpha-1;Ribosomal protein S6 kinase;Ribosomal protein S6 kinase alpha-2;Ribosomal protein S6 kinase alpha-3	Rps6ka1;Rps6ka2;Rps6ka3	FGFAKQLRAENGLLMTPCYTANFVAPEVLKR	QLRAENGLLMT(0.995)PCY(0.004)TANFVAPEVLK	QLRAENGLLMT(23.73)PCY(-23.73)T(-33.01)ANFVAPEVLK	11	0.00268028	78.352	3	972.478	0.82456	+	0.130237	0.554404		2	0.342321	0.299931	0.120531	0.191836	0.169086		2	0.180461	0.0160866	0.0961392
5055	P54276	79	S	P54276	S79	DNA mismatch repair protein Msh6	Msh6	PEAKDLNGGLRRASSSAQAVPPSSCDFSPGD	RAS(0.024)S(0.088)S(0.886)AQAVPPS(0.002)S(0.001)CDFSPGDLVWAK	RAS(-15.68)S(-10.03)S(10.03)AQAVPPS(-27.26)S(-32.34)CDFS(-55.94)PGDLVWAK	5	2.1436e-16	115.96	3	900.742	-0.15386	+	0.43072	0.339809	0.727996	3	0.499508	0.20303	0.0327627	0.194526	0.116076	0.392352	3	0.234318	0.142371	0.0967026
10976	Q9QUJ7;Q9QUJ7-2	447;406	S	Q9QUJ7	S447	Long-chain-fatty-acid--CoA ligase 4	Acsl4	LGGNVRMMLSGGAPLSPQTHRFMNVCFCCPI	MMLSGGAPLS(0.993)PQT(0.007)HR	MMLS(-43.65)GGAPLS(21.52)PQT(-21.52)HR	10	0.00177169	78.985	3	554.921	0.44699	+	0.324653	0.307795	0.294658	3	0.309035	0.0150357	0.093102	0.188371	0.197804	0.208527	3	0.198234	0.0100846	0.0976823
3649	Q80XS6;G5E8A7	243;243	S	Q80XS6	S243	Protein Smaug homolog 2	Samd4b	IHPSPLKRSMSLIPTSPQAPGEWPSPEELGA	RS(0.003)MS(0.011)LIPT(0.143)S(0.842)PQAPGEWPS(0.001)PEELGAR	RS(-24.99)MS(-18.7)LIPT(-7.69)S(7.69)PQAPGEWPS(-31.52)PEELGAR	9	1.80069e-08	95.666	3	925.105	-3.2101	+	0.591888	0.417389	0.496209	3	0.501829	0.0873852	0.025936	0.147471	0.241023	0.231421	3	0.206639	0.0514648	0.0988033
5951	Q61337;Q3U9H3;F7ABX5;D3YZR8	136;94;93;136	S	Q61337	S136	Bcl2 antagonist of cell death	Bad	EGMEEELSPFRGRSRSAPPNLWAAQRYGREL	S(1)APPNLWAAQR	S(67.95)APPNLWAAQR	1	8.66002e-05	121.21	2	645.803	-2.3362	+	0.443857	0.422918	0.488077	3	0.451617	0.0332652	0.0327627	0.207426	0.173361	0.211047	3	0.197278	0.0207918	0.0988033
2890	Q9QXS1-3;E9QMZ5;Q9QXS1-6;E9Q3W4;Q9QXS1-15;Q9QXS1-10;E9Q153;Q9QXS1-9;Q9QXS1-12;E9QKX4;Q9QXS1-11;Q9QXS1-13;E9QLJ5;Q9QXS1-5;E9PY96;Q9QXS1-16;Q9QXS1-4;E9QL05;Q9QXS1-14;E9QQ00;Q9QXS1-7;Q9QXS1-8;E9QK43;Q9QXS1;Q9QXS1-2;E9QPE8;E9QN87	4241;4241;4270;4084;4147;4209;4209;4214;4219;4219;4224;4232;4232;4241;4241;4242;4246;4246;4248;4248;4275;4287;4287;4389;4384;4384;4389	S	Q9QXS1-3;Q9QXS1	S4241	Plectin	Plec	TEFADMLSGNAGGFRSRSSSVGSSSSYPISS	AGTLSITEFADMLS(0.005)GNAGGFRS(0.995)R	AGT(-62.12)LS(-53.9)IT(-51.92)EFADMLS(-23.04)GNAGGFRS(23.04)R	22	1.45323e-05	102.24	3	813.377	0.22549	+	0.106803	0.0892691	0.284172	3	0.160081	0.107823	0.330846	0.203523	0.149589	0.241626	3	0.198246	0.0462449	0.0988033
8331	Q8BJ34-6;Q8BJ34-3;Q8BJ34-4;Q8BJ34;Q8BJ34-2	65;15;65;65;15	S	Q8BJ34-6	S65	Meiosis arrest female protein 1	Marf1	YMENKKAAVELKDIPSPLHVGSKFFPAVPLP	DIPS(1)PLHVGSK	DIPS(77.65)PLHVGS(-77.65)K	4	0.000147741	115.34	3	410.536	0.17662	+	0.573545	0.605617	0.691969	3	0.62371	0.0612506	0.0126219	0.17607	0.147151	0.278635	3	0.200618	0.0690941	0.0995088
7062	Q64151	718	S	Q64151	S718	Semaphorin-4C	Sema4c	ERTLVYPLELPKEPASPPFRPGPETDEKLWD	TLVYPLELPKEPAS(0.826)PPFRPGPET(0.174)DEK	T(-75.43)LVY(-69.62)PLELPKEPAS(6.76)PPFRPGPET(-6.76)DEK	14	9.00091e-05	86.761	4	747.625	-2.9379	+		0.473954	0.532525	2	0.503239	0.0414161	0.0247002		0.131907	0.283513	2	0.20771	0.107201	0.0995088
3068	Q8VEL2;F6W741	622;238	S	Q8VEL2	S622	Myotubularin-related protein 14	Mtmr14	LAAYSSTVGLRAATPSPSGAIGGLLEQFARG	AATPS(1)PSGAIGGLLEQFAR	AAT(-53.65)PS(39.33)PS(-39.33)GAIGGLLEQFAR	5	1.34256e-88	191.9	2	961.972	1.0454	+	0.444732	0.366834	0.599238	3	0.470268	0.118288	0.0325765	0.192675	0.314289	0.177753	3	0.228239	0.0748938	0.0995088
7538	Q6PGG6	459	S	Q6PGG6	S459	Guanine nucleotide-binding protein-like 3-like protein	Gnl3l	LGDMDPQEMEVRWLHSPLVKIADAIENRSTV	WLHS(1)PLVK	WLHS(53.76)PLVK	4	0.0010607	112.3	3	353.851	-0.97226	+	-0.0673842	0.123819	0.438827	3	0.165087	0.255616	0.729875	0.178657	0.133507	0.310105	3	0.207423	0.0917462	0.0995088
704	E9Q449;A6H8H2;A6H8H2-2	1270;1221;1270	S	E9Q449	S1270	DENN domain-containing protein 4C	Dennd4c	TECVEKTSDSEDKLFSPVISRNLADEIESYM	LFS(1)PVISR	LFS(70.09)PVIS(-70.09)R	3	2.0552e-11	119.51	2	499.757	1.0544	+	0.596597	0.521282	0.63498	3	0.584286	0.0578402	0.0155693	0.195145	0.153388	0.235824	3	0.194786	0.0412191	0.0999157
1695	P06537;E9Q310;P06537-3;P06537-4;P06537-2;E9PUR6;E9PYV1	275;284;248;248;275;284;284	S	P06537	S275	Glucocorticoid receptor	Nr3c1	DTKPKIQDTGDTILSSPSSVALPQVKTEKDD	IQDTGDTILS(0.044)S(0.867)PS(0.044)S(0.044)VALPQVK	IQDT(-114.45)GDT(-89.27)ILS(-12.91)S(12.91)PS(-12.91)S(-12.91)VALPQVK	11	4.11564e-105	194.04	2	1118.56	0.96278	+		0.369809	0.196789	2	0.283299	0.122344	0.137989		0.139911	0.260728	2	0.200319	0.0854311	0.100739
5394	P70452;D6RJ29	36;36	S	P70452	S36	Syntaxin-4	Stx4;Stx4a	VRVALVVHSGAARLGSPDDEFFQKVQTIRQT	LGS(1)PDDEFFQK	LGS(83.86)PDDEFFQK	3	3.26115e-17	132.24	2	681.784	-0.93883	+		0.373905	-0.426609	2	-0.0263521	0.566048	0.931578		0.236134	0.186532	2	0.211333	0.0350736	0.101231
9136	Q8CIN4	152	S	Q8CIN4	S152	Serine/threonine-protein kinase PAK 2;PAK-2p27;PAK-2p34	Pak2	QKYLSFTPPEKDGFPSGTPALNTKGSETSAV	DGFPS(1)GTPALNTK	DGFPS(33.43)GT(-33.43)PALNT(-57.84)K	5	1.99143e-18	156.11	2	692.811	0.36899	+	0.475453	0.485551	0.402843	3	0.454616	0.0451202	0.0362453	0.246149	0.106633	0.308158	3	0.220313	0.103217	0.101725
10450	Q9D2E2	349	S	Q9D2E2	S349	Target of EGR1 protein 1	Toe1	EDKRRRRRRKDKRKRSLQSQPGTQTLAEAED	KRS(0.823)LQS(0.172)QPGT(0.006)QTLAEAEDGPPTK	KRS(6.81)LQS(-6.81)QPGT(-21.61)QT(-41.25)LAEAEDGPPT(-79.33)K	3	7.50057e-05	101.6	3	840.409	-3.7806	+	0.43756	0.357573		2	0.397567	0.0565597	0.0443681	0.267711	0.128367		2	0.198039	0.098531	0.103468
1080	Q65Z40;B7ZP47	101;101	S	Q65Z40	S101	Wings apart-like protein homolog	Wapal	SKNLAQGKGSSYSESSEAAQLEEVTSVFEAN	NLAQGKGS(0.01)S(0.01)Y(0.008)S(0.041)ES(0.073)S(0.858)EAAQLEEVTSVFEANSK	NLAQGKGS(-19.42)S(-19.42)Y(-20.14)S(-13.21)ES(-10.73)S(10.73)EAAQLEEVT(-45.7)S(-50.26)VFEANS(-80.1)K	14	1.51298e-43	146.19	3	1109.83	-0.56953	+	0.367505		0.323416	2	0.345461	0.0311756	0.0743691	0.213504		0.211563	2	0.212534	0.00137263	0.103468
4732	P33215;P33215-2	411;411	S	P33215	S411	Protein NEDD1	Nedd1	SSFDDTGKNSLGDMFSPIRDDAVVSKGGDES	NSLGDMFS(1)PIRDDAVVSK	NS(-39.93)LGDMFS(39.93)PIRDDAVVS(-40.82)K	8	0.000164738	98.3	3	677.647	-0.95078	+	0.297651	0.287869	0.373516	3	0.319679	0.0468803	0.0820446	0.113628	0.199371	0.370224	3	0.227741	0.130629	0.104387
5075	P55200;P55200-2	2197;2194	S	P55200	S2197	Histone-lysine N-methyltransferase 2A;MLL cleavage product N320;MLL cleavage product C180	Kmt2a	PLLSSGLRSIGSRRHSTSSLSPLRSKLRIMS	RHS(0.991)T(0.007)S(0.001)S(0.001)LSPLR	RHS(21.21)T(-21.21)S(-31.01)S(-31.01)LS(-45.46)PLR	3	0.0010758	109.99	2	660.825	-1.9455	+	0.493277	0.879234	0.573879	3	0.648797	0.203593	0.0144028	0.107722	0.367635	0.287376	3	0.254244	0.133087	0.105217
12560	P05627	62	T	P05627	T62	Transcription factor AP-1	Jun	GSLKPHLRAKNSDLLTSPDVGLLKLASPELE	NS(0.02)DLLT(0.878)S(0.102)PDVGLLK	NS(-16.51)DLLT(9.34)S(-9.34)PDVGLLK	6	1.55123e-154	225.86	3	517.927	-1.3403	+	0.510612	0.505177	0.501235	3	0.505675	0.00470841	0.0240782	0.190838	0.21434	0.190925	3	0.198701	0.0135441	0.105217
10503	Q9D6Z1;A2APD7	554;270	S	Q9D6Z1	S554	Nucleolar protein 56	Nop56	EEAASPTTPKKKRKFSEEPEVAANFTKSSTK	RKFS(1)EEPEVAANFTK	RKFS(80.37)EEPEVAANFT(-80.37)K	4	2.7011e-80	200.6	3	611.624	1.2244	+	0.857248	0.796727	0.845393	3	0.833123	0.0320722	0.00367167	0.250171	0.239049	0.162247	3	0.217156	0.0478761	0.106721
9904	Q922M7	193	S	Q922M7	S193	Ashwin		MNRKSPSGPVKSPPLSPVGTTPVKLKRAAPK	SPPLS(1)PVGTTPVK	S(-74.22)PPLS(45.11)PVGT(-48.33)T(-45.11)PVK	5	2.17611e-42	174.4	2	680.35	-0.68839	+	0.903719	0.647979	0.751365	3	0.767688	0.128649	0.0066267	0.17774	0.206988	0.197254	3	0.193994	0.0148937	0.106721
1507	D3Z6Q9;S4R1B8;S4R270;S4R2J8	392;382;409;377	S	D3Z6Q9	S392	Bridging integrator 2	Bin2	DTPSPGDVVLRARASSEGAEQSKRAASIQRT	ASS(1)EGAEQSK	AS(-48.43)S(48.43)EGAEQS(-137.14)K	3	4.93174e-38	187.62	2	537.211	0.65785	+	0.716037	0.600276	0.71697	3	0.677761	0.0671058	0.00970389	0.257809	0.119157	0.236235	3	0.2044	0.074607	0.106721
9012	Q8CFD4	450	S	Q8CFD4	S450	Sorting nexin-8	Snx8	SCLFAGPHSVLTPPRSPQEDGVCPH______	LSCLFAGPHSVLT(0.001)PPRS(0.999)PQEDGVCPH	LS(-59.3)CLFAGPHS(-45.47)VLT(-32.56)PPRS(32.56)PQEDGVCPH	17	0.000244644	86.557	3	980.117	-0.80484	+		0.326643	0.331474	2	0.329059	0.00341623	0.0825938		0.140539	0.248428	2	0.194484	0.076289	0.106721
7019	Q62418;Q62418-3;Q62418-2	291;287;288	S	Q62418	S291	Drebrin-like protein	Dbnl	MSTTSVTSSQPGKLRSPFLQKQLTQPETSYG	LRS(1)PFLQK	LRS(84.69)PFLQK	3	0.00654208	86.898	3	356.858	1.0007	+	0.242492	0.275818	0.291545	3	0.269952	0.0250473	0.117703	0.215098	0.176843	0.19104	3	0.194327	0.0193378	0.106721
3756	Q80YV2;H3BKM2;Q80YV2-2;D3Z3D0	68;68;68;68	S	Q80YV2	S68	Nuclear-interacting partner of ALK	Zc3hc1	AATFQSVDGSPQAEQSPLESTSKEAFFHRVE	DTAATFQSVDGSPQAEQS(0.994)PLES(0.002)T(0.002)S(0.001)K	DT(-92.9)AAT(-88.98)FQS(-78.26)VDGS(-62.21)PQAEQS(26.04)PLES(-26.04)T(-26.04)S(-31.03)K	18	9.32807e-25	113.51	3	887.724	0.61246	+	0.338875	0.312854	0.197288	3	0.283006	0.0753652	0.120395	0.21322	0.168821	0.198267	3	0.193436	0.0225901	0.106721
10801	Q9ES00;G3UZD6;G3UZM6	105;105;105	S	Q9ES00	S105	Ubiquitin conjugation factor E4 B	Ube4b	SNSLETQSQSLSRSQSMDIDGVSCEKSMSQV	S(0.005)QS(0.995)MDIDGVSCEK	S(-22.65)QS(22.65)MDIDGVS(-100.37)CEK	3	5.29236e-09	137.85	2	768.291	-0.44694	+	0.217668	0.246425	-0.11294	3	0.117051	0.199696	0.756296	0.144796	0.180928	0.252208	3	0.192644	0.0546559	0.106891
3358	F8WIE5;Q69ZR2	1345;1350	S	F8WIE5	S1345	E3 ubiquitin-protein ligase HECTD1	Hectd1	FDLKLAPGYDPDTVASPKPVSSTVSGTTQSW	LAPGY(0.002)DPDT(0.072)VAS(0.902)PKPVS(0.007)S(0.007)T(0.007)VSGTTQSWSSLVK	LAPGY(-27.67)DPDT(-10.96)VAS(10.96)PKPVS(-20.8)S(-20.8)T(-20.8)VS(-34.44)GT(-33.69)T(-32.91)QS(-36.76)WS(-44.06)S(-47.5)LVK	12	5.23724e-06	81.763	3	1114.88	-3.6147	+	0.746432	0.759887	0.805458	3	0.770592	0.030935	0.00484222	0.148876	0.176959	0.242969	3	0.189601	0.0483033	0.107013
4727	P33174	802	S	P33174	S802	Chromosome-associated kinesin KIF4	Kif4	ESGENPPLKLRRRTFSYDEIHGQDSGAEDSI	T(0.135)FS(0.865)YDEIHGQDSGAEDSIAK	T(-8.07)FS(8.07)Y(-55.61)DEIHGQDS(-32.43)GAEDS(-58.07)IAK	3	3.08846e-78	174.99	2	1125.47	-1.4741	+	0.752218	0.691568	0.887529	3	0.777105	0.100323	0.00484222	0.156145	0.167317	0.239306	3	0.187589	0.0451351	0.107013
14068	Q99N57;Q99N57-2	31;31	T	Q99N57	T31	RAF proto-oncogene serine/threonine-protein kinase	Raf1	GLKDAVFDGSSCISPTIVQQFGYQRRASDDG	DAVFDGSSCIS(0.025)PT(0.975)IVQQFGYQR	DAVFDGS(-39.57)S(-41.1)CIS(-15.91)PT(15.91)IVQQFGY(-64.71)QR	13	1.01771e-125	198.47	2	1278.07	1.1652	+	0.788501	0.724538	0.679314	3	0.730784	0.0548608	0.00684717	0.191857	0.2675	0.171469	3	0.210275	0.0505958	0.107013
6985	Q62261-2	14	S	Q62261-2	S14	Spectrin beta chain, non-erythrocytic 1	Sptbn1	__MELQRTSSISGPLSPAYTGQVPYNYNQLE	T(0.09)S(0.441)S(0.441)IS(0.029)GPLS(0.999)PAYTGQVPYNYNQLEGR	T(-6.92)S(0)S(0)IS(-11.98)GPLS(30.97)PAY(-47.36)T(-70.58)GQVPY(-106.3)NY(-113.5)NQLEGR	9	6.55099e-100	171.14	2	1480.15	0.1601	+	0.716087	0.581403	0.661803	3	0.653098	0.0677623	0.0112243	0.16436	0.234846	0.195016	3	0.198074	0.0353424	0.107013
8068	Q80XK6;Q80XK6-5	379;379	S	Q80XK6	S379	Autophagy-related protein 2 homolog B	Atg2b	YRIQMELNRYYLRKDSLSMGVSSEKSFYETE	KDS(0.938)LS(0.062)MGVSSEK	KDS(11.83)LS(-11.83)MGVS(-43.98)S(-46.72)EK	3	0.00777655	112.57	3	449.867	-0.069936	+		0.408342	0.379708	2	0.394025	0.0202473	0.0523652		0.260787	0.174405	2	0.217596	0.061081	0.107013
2980	Q91WC9;F6QP10	582;500	S	Q91WC9	S582	Sn1-specific diacylglycerol lipase beta	Daglb	TRYSPGYCSSDSPLDSPTKYPTLYPPGRIIH	YSPGYCSSDS(0.001)PLDS(0.929)PT(0.052)KY(0.016)PT(0.001)LYPPGR	Y(-55.44)S(-54.24)PGY(-44.58)CS(-39.81)S(-39.81)DS(-32.31)PLDS(12.49)PT(-12.49)KY(-17.55)PT(-28.61)LY(-39.63)PPGR	14	0.00237264	70.994	3	995.772	0.60031	+	0.345138		0.429819	2	0.387479	0.0598783	0.0527467	0.227752		0.198939	2	0.213346	0.0203733	0.107013
13020	Q3U821	691	T	Q3U821	T691		Wdr75	LTPTSKQLLAEESLPTTPFSFILGKHRQQQG	QLLAEESLPT(0.98)T(0.012)PFS(0.008)FILGK	QLLAEES(-71.22)LPT(19.17)T(-19.17)PFS(-21.06)FILGK	10	3.60751e-122	193.87	2	1086.06	-0.44994	+	0.536899	0.621197	0.406647	3	0.521581	0.108092	0.0277814	0.118524	0.182671	0.318379	3	0.206525	0.10204	0.109458
11748	O70475;D3Z3F7	474;407	T	O70475	T474	UDP-glucose 6-dehydrogenase	Ugdh	IETIGKKVSSKRIPYTPGEIPKFSLQDPPNK	RIPYT(1)PGEIPK	RIPY(-38.88)T(38.88)PGEIPK	5	5.74541e-05	136.33	3	450.899	-0.12701	+	0.48028	0.411721	0.448379	3	0.446793	0.0343072	0.0349179	0.171727	0.183355	0.204141	3	0.186408	0.0164211	0.109458
6055	Q3UHX2	178	S	Q3UHX2	S178	28 kDa heat- and acid-stable phosphoprotein	Pdap1	AKDDATLSGKRMQSLSLNK____________	RMQS(0.001)LS(0.999)LNK	RMQS(-29.92)LS(29.92)LNK	6	0.0142751	67.252	3	386.19	1.0094	+	0.396949	0.215003	0.400783	3	0.337578	0.106171	0.0855144	0.217112	0.165808	0.192025	3	0.191648	0.025654	0.11014
4821	P42128	406	S	P42128	S406	Forkhead box protein K1	Foxk1	FRTPFGPLSSRSAPASPTHPGLMSPRSSGLQ	SAPAS(0.999)PT(0.001)HPGLMSPR	S(-39.29)APAS(31.25)PT(-31.25)HPGLMS(-57.49)PR	5	0.00224	115.2	2	793.363	-1.268	+	0.345981	0.543497	0.587136	3	0.492205	0.1285	0.0295407	0.171475	0.147862	0.239231	3	0.186189	0.0474284	0.11201
10637	Q9DBR7;Q9DBR7-2	299;299	S	Q9DBR7	S299	Protein phosphatase 1 regulatory subunit 12A	Ppp1r12a	QKKQTLLHSEKRDKKSPLIESTANMENNQPQ	DKKS(0.983)PLIES(0.008)T(0.008)ANMENNQPQK	DKKS(20.63)PLIES(-20.63)T(-20.63)ANMENNQPQK	4	0.00307578	78.228	4	588.778	-0.2706	+	-0.104738		0.38236	2	0.138811	0.34443	0.984825	0.156836		0.249183	2	0.203009	0.0652995	0.113894
8264	Q8BHB4	333	S	Q8BHB4	S333	WD repeat-containing protein 3	Wdr3	MDKKLKKARKKARLNSANEEEDPETSVSMTL	LNS(1)ANEEEDPETSVSMTLQDEILR	LNS(92.78)ANEEEDPET(-92.78)S(-95.53)VS(-99.84)MT(-106.54)LQDEILR	3	1.08999e-45	143	2	1400.62	-0.26153	+	0.67133	0.706752	0.426351	3	0.601478	0.152695	0.0208211	0.224528	0.282781	0.152983	3	0.220097	0.0650122	0.114611
3599	G3X9Q3;Q3TBD2;D3Z7R7;Q3TBD2-4;Q3TBD2-3;Q3TBD2-2	875;875;886;414;566;759	S	G3X9Q3	S875	Minor histocompatibility protein HA-1	Hmha1	AEAEAKAASRGRQGGSESEAATLAMVGRLRE	QGGS(1)ESEAATLAMVGR	QGGS(45.59)ES(-45.59)EAAT(-97.5)LAMVGR	4	5.7593e-52	181.61	2	822.358	0.1619	+	0.553883	0.452538	0.556299	3	0.520907	0.0592215	0.0229732	0.227935	0.249761	0.156979	3	0.211558	0.0485104	0.114611
275	Q7TMY8;Q7TMY8-3;A2AFQ0;Q7TMY8-4	3754;3754;3755;3754	S	Q7TMY8	S3754	E3 ubiquitin-protein ligase HUWE1	Huwe1	RRANKKAKQTGRLGSSGLGSASSIQAAVRQL	LGS(0.141)S(0.859)GLGSASSIQAAVR	LGS(-7.86)S(7.86)GLGS(-60.42)AS(-50.23)S(-54.79)IQAAVR	4	7.72557e-11	146.68	2	820.904	-0.47745	+		0.342679	0.538892	2	0.440786	0.138743	0.0401292		0.149927	0.221227	2	0.185577	0.0504165	0.114611
2236	E9Q3P4	1486	S	E9Q3P4	S1486		Cenpf	AEGGHGLPLSFCGADSPSLTNFGETSFYKDV	EGEPAAEGGHGLPLSFCGADS(0.938)PS(0.058)LT(0.004)NFGETSFYK	EGEPAAEGGHGLPLS(-33.85)FCGADS(12.07)PS(-12.07)LT(-23.85)NFGET(-46.33)S(-51.7)FY(-57.94)K	21	1.34194e-52	114.79	3	1203.86	-0.50142	+	-0.0484391	0.137702	0.118724	3	0.069329	0.102431	0.911275	0.123857	0.172778	0.296915	3	0.19785	0.0892116	0.114611
3182	Q9DBF7;F7BY36	328;81	S	Q9DBF7	S328	Pre-mRNA-splicing factor CWC25 homolog	Cwc25	EAYQRRHASGYTRKLSAEELERKRQEMMENA	KLS(1)AEELER	KLS(54.2)AEELER	3	0.00786634	74.698	3	385.52	-0.30518	+	0.517011	0.400969	0.677925	3	0.531969	0.139083	0.0235944	0.162633	0.160108	0.227664	3	0.183468	0.0382952	0.114963
13382	Q6P5D4	1121	T	Q6P5D4	T1121	Centrosomal protein of 135 kDa	Cep135	ERERAIQEMRRLGLPTSPLSSTLKSPVQTPD	LGLPT(0.958)S(0.042)PLSSTLK	LGLPT(13.61)S(-13.61)PLS(-42.72)S(-57.41)T(-57.41)LK	5	1.73299e-17	152.07	2	697.371	1.6566	+	0.364119	0.297848		2	0.330984	0.0468609	0.0681874	0.177871	0.153784		2	0.165828	0.0170319	0.115231
391	A2AKX3	207	S	A2AKX3	S207	Probable helicase senataxin	Setx	VLTCLFKVIELGLLESPDIYTSSVLEKGKLI	VIELGLLES(0.999)PDIY(0.001)TSSVLEK	VIELGLLES(29.05)PDIY(-29.05)T(-39.7)S(-46.74)S(-51.83)VLEK	9	5.01127e-14	115.26	3	762.39	0.74775	+	0.0442261	0.344176		2	0.194201	0.212097	0.332963	0.164113	0.166312		2	0.165212	0.00155475	0.115499
8070	Q80XK6	665	S	Q80XK6	S665	Autophagy-related protein 2 homolog B	Atg2b	HSETRGPQGNQARLSSVPQKAELQIKLNPVC	LS(0.121)S(0.879)VPQKAELQIK	LS(-8.62)S(8.62)VPQKAELQIK	3	0.00016976	107.69	3	507.608	1.0377	+	0.813174	0.77205	0.766015	3	0.783746	0.0256632	0.00474248	0.257432	0.252659	0.148204	3	0.219432	0.0617312	0.115513
4299	O88796	251	S	O88796	S251	Ribonuclease P protein subunit p30	Rpp30	KTAFGIISTVKKPRPSEADDESLPVCKKAKC	KPRPS(1)EADDESLPVCK	KPRPS(36.51)EADDES(-36.51)LPVCK	5	0.000492062	109.28	3	636.624	-0.025339	+	0.723168	0.660524	0.723745	3	0.702479	0.0363353	0.00765524	0.133973	0.172019	0.254925	3	0.186972	0.0618472	0.11607
13021	Q3U821	692	T	Q3U821	T692		Wdr75	TPTSKQLLAEESLPTTPFSFILGKHRQQQGA	QLLAEESLPT(0.006)T(0.989)PFS(0.006)FILGK	QLLAEES(-86.9)LPT(-22.54)T(22.54)PFS(-22.54)FILGK	11	5.21775e-104	186.7	3	724.373	0.49346	+	0.517948	0.548868	0.497054	3	0.52129	0.0260682	0.0229732	0.174366	0.225025	0.178526	3	0.192639	0.028124	0.11607
10013	Q99K70;Q99K70-2	2;2	S	Q99K70	S2	Ras-related GTP-binding protein C	Rragc	______________MSLQYGAEETPLAGSYG	S(1)LQYGAEETPLAGS(0.999)Y(0.001)GAADSFPK	S(50)LQY(-50)GAEET(-58.06)PLAGS(29.67)Y(-29.67)GAADS(-46.93)FPK	1	6.45922e-29	146.9	2	1281.03	-0.37725	+	0.521635	-0.225746		2	0.147945	0.528478	0.99248	0.485386	0.099508		2	0.292447	0.272857	0.11607
4728	P33174	811	S	P33174	S811	Chromosome-associated kinesin KIF4	Kif4	LRRRTFSYDEIHGQDSGAEDSIAKQIESLET	RT(0.02)FS(0.02)Y(0.001)DEIHGQDS(0.944)GAEDS(0.016)IAK	RT(-16.84)FS(-16.84)Y(-31.66)DEIHGQDS(16.84)GAEDS(-17.73)IAK	13	0.000213254	84.127	3	802.68	0.80078	+	0.815644	0.835614	0.905319	3	0.852193	0.0470801	0.00329304	0.127651	0.184038	0.25048	3	0.18739	0.0614829	0.11675
962	B2RT41	358	S	B2RT41	S358		Zfc3h1	GLEDKEQNLTRRLSASDIVSEKKLGEEEEEL	RLS(0.128)AS(0.872)DIVSEK	RLS(-8.33)AS(8.33)DIVS(-44.67)EK	5	0.000112828	109.95	3	428.878	0.4526	+	0.506735	0.48005	0.488759	3	0.491848	0.013608	0.0260963	0.141535	0.175425	0.231281	3	0.182747	0.0453186	0.11675
2221	E9Q3G8	339	S	E9Q3G8	S339		Nup153	ADAKRIPSAVSSPLNSPLDRSGIDNTVFQAK	RIPSAVSSPLNS(1)PLDR	RIPS(-111.88)AVS(-84.16)S(-74.57)PLNS(74.57)PLDR	12	3.1803e-06	131.13	3	596.972	-1.4093	+	0.640918	0.388403	0.471688	3	0.500336	0.128672	0.029272	0.236692	0.149281	0.186246	3	0.190739	0.0438785	0.11675
12686	P30558	415	T	P30558	T415	Proteinase-activated receptor 1	F2r	NSCNSTGQLMPSKMDTCSSHLNNSIYKKLLA	MDT(1)CSSHLNNSIYKK	MDT(47.03)CS(-47.03)S(-51.42)HLNNS(-48.22)IY(-48.27)KK	3	0.0104042	61.11	3	626.602	1.781	+		0.371991	0.552021	2	0.462006	0.1273	0.0334281		0.197253	0.181312	2	0.189283	0.0112717	0.11675
14587	Q6P549	987	Y	Q6P549	Y987	Phosphatidylinositol 3,4,5-trisphosphate 5-phosphatase 2	Inppl1	GVAAPPPKNSFNNPAYYVLEGVPHQLLPLEP	NSFNNPAY(0.966)Y(0.034)VLEGVPHQLLPLEPPSLAR	NS(-36.97)FNNPAY(14.58)Y(-14.58)VLEGVPHQLLPLEPPS(-122)LAR	8	1.38193e-51	134.03	3	1072.54	0.31904	+	0.500525	0.326623	0.367897	3	0.398348	0.0908621	0.0534584	0.199998	0.235781	0.1645	3	0.200093	0.0356407	0.11675
6261	Q4QRL3;Q4QRL3-2	656;656	S	Q4QRL3	S656	Coiled-coil domain-containing protein 88B	Ccdc88b	KAQVLKQESPKCRPRSAELTLREPLKDQKAL	S(1)AELTLREPLK	S(88.79)AELT(-88.79)LREPLK	1	5.80901e-05	125.36	3	446.234	-0.8813	+	0.385928	0.217616	0.464174	3	0.355906	0.125991	0.0755227	0.228155	0.0969795	0.296502	3	0.207212	0.101397	0.11675
9484	Q8R322	368	S	Q8R322	S368	Nucleoporin GLE1	Gle1	QVQQGPAPPTQTSAPSPSPVGAQNEDLQVKV	RQESQVQQGPAPPTQTSAPS(0.881)PS(0.118)PVGAQNEDLQVK	RQES(-53.96)QVQQGPAPPT(-39.63)QT(-37.54)S(-33.03)APS(8.74)PS(-8.74)PVGAQNEDLQVK	20	6.32776e-08	76.749	3	1212.91	-0.60835	+	0.123329	0.303606		2	0.213468	0.127475	0.179721	0.152532	0.176525		2	0.164529	0.0169657	0.11675
14283	Q9JI10;Q9JI10-2	390;320	T	Q9JI10	T390	Serine/threonine-protein kinase 3;Serine/threonine-protein kinase 3 36kDa subunit;Serine/threonine-protein kinase 3 20kDa subunit	Stk3	EEEEEEEDGTMKRNATSPQVQRPSFMDYFDK	NAT(0.761)S(0.237)PQVQRPS(0.001)FMDY(0.001)FDK	NAT(5.07)S(-5.07)PQVQRPS(-28.87)FMDY(-31.51)FDK	3	0.00145776	82.294	3	737.657	1.1874	+	0.271051	0.672698	-0.60244	3	0.11377	0.651956	0.75317	0.122946	0.6129	0.204795	3	0.313547	0.262458	0.11675
13017	Q3U6N9;Q3U6N9-2;Q3U6N9-3	209;146;147	T	Q3U6N9	T209	UPF0488 protein C8orf33 homolog		SGRVCRPRPAERAKTTPDLTSEEFRFNFF__	AKT(0.118)T(0.882)PDLTSEEFRFNFF	AKT(-8.73)T(8.73)PDLT(-63.75)S(-68.74)EEFRFNFF	4	8.65108e-05	130.66	3	710.658	1.0631	+	0.709355	0.645206	0.574156	3	0.642906	0.0676287	0.0119814	0.256929	0.24005	0.146959	3	0.214646	0.0592231	0.117452
705	E9Q449;A6H8H2;A6H8H2-2	1289;1240;1289	S	E9Q449	S1289	DENN domain-containing protein 4C	Dennd4c	SRNLADEIESYMNLKSPLGSKSCSMELHGEG	NLADEIESYMNLKS(0.998)PLGS(0.002)K	NLADEIES(-38.63)Y(-46.05)MNLKS(28.1)PLGS(-28.1)K	14	5.29864e-08	129.36	3	730.345	1.2534	+	0.347857	0.345413	0.370295	3	0.354522	0.0137147	0.0635035	0.165999	0.181815	0.194248	3	0.180687	0.014158	0.119004
3469	Q8BWW9;G3UXH4;G3UZM9;Q8BWW9-2;Q8BWW9-3;G3UYD6	305;305;305;294;305;87	S	Q8BWW9	S305	Serine/threonine-protein kinase N2	Pkn2	SVVIEELSLVASPTLSPRQSMLSTQNQYSTL	SSVVIEELSLVASPT(0.001)LS(0.999)PR	S(-179.45)S(-179.45)VVIEELS(-97.3)LVAS(-52.48)PT(-28.94)LS(28.94)PR	17	0	262.33	2	1032.53	-0.46441	+	0.357058	0.38591	0.492306	3	0.411758	0.0712328	0.0431932	0.184774	0.156882	0.200212	3	0.180623	0.021961	0.11903
4777	P35831	748	S	P35831	S748	Tyrosine-protein phosphatase non-receptor type 12	Ptpn12	DSPPAFSDKKDQITKSPAEVTDIGFGNRCGK	DQIT(0.004)KS(0.996)PAEVTDIGFGNR	DQIT(-24.44)KS(24.44)PAEVT(-64.21)DIGFGNR	6	2.33022e-06	130.72	3	676.653	-0.64933	+	0.216984	0.294466	0.285268	3	0.265573	0.0423299	0.121956	0.138776	0.147181	0.27137	3	0.185776	0.0742458	0.120761
6733	Q61037-6;Q7TT21;Q61037;Q61037-7;Q61037-4;Q61037-3;Q61037-2;Q61037-5	939;939;939;939;939;900;902;939	S	Q61037-6	S939	Tuberin	Tsc2	FDDTPEKDSFRARSTSLNERPKSLRIARAPK	S(0.002)T(0.038)S(0.96)LNERPK	S(-26.39)T(-14.08)S(14.08)LNERPK	3	0.00423865	95.273	2	556.261	-0.013422	+	0.530264	0.51399	0.593835	3	0.546029	0.0421927	0.019685	0.288775	0.120771	0.195697	3	0.201748	0.0841652	0.121326
4615	P24452;Q99LB4	327;324	S	P24452;Q99LB4	S327	Macrophage-capping protein	Capg	AALQVADGFISRMRYSPNTQVEILPQGRESP	MRY(0.016)S(0.9)PNT(0.084)QVEILPQGR	MRY(-17.61)S(10.28)PNT(-10.28)QVEILPQGR	4	0.0107711	71.842	3	656.984	-2.5854	+	0.189434	0.0586917		2	0.124063	0.0924489	0.43135	0.155324	0.165571		2	0.160447	0.0072455	0.121326
319	Q8BWJ3;A2AHQ7	735;735	S	Q8BWJ3	S735	Phosphorylase b kinase regulatory subunit alpha, liver isoform	Phka2	TKVLSGHRKSLNLVDSPQPLLKTTPEYDYQW	SLNLVDS(1)PQPLLK	S(-86.2)LNLVDS(86.2)PQPLLK	7	2.39859e-14	147.75	2	752.395	-0.76813	+	0.555796	0.606048	0.514648	3	0.55883	0.0457756	0.0194522	0.217692	0.182015	0.166815	3	0.188841	0.0261166	0.121696
1614	Q8BYJ6;Q8BYJ6-2;Q8BYJ6-4;Q8BYJ6-3;H7BX82;E9Q6Q8;E0CX53;F6SUV7	577;577;576;577;577;577;577;290	S	Q8BYJ6	S577	TBC1 domain family member 4	Tbc1d4	KLDVLKNKAKRSLTSSLENIFSRGANRMRGR	SLTS(0.007)S(0.993)LENIFSR	S(-140.07)LT(-59.61)S(-21.25)S(21.25)LENIFS(-119.42)R	5	3.21987e-133	222.55	2	717.337	-0.31514	+	0.501853	0.483259	0.508036	3	0.497716	0.0128962	0.0250625	0.183076	0.133603	0.225914	3	0.180864	0.0461953	0.121752
2706	E9QAI5;B2RQC6;B7ZN27;G3UWN2	1852;1915;1915;1915	S	E9QAI5	S1852		Cad	SPQNLGSSGLLHPQMSPLLHSLVGQHILSVK	QAS(0.001)PQNLGS(0.081)S(0.067)GLLHPQMS(0.836)PLLHS(0.011)LVGQHILS(0.004)VK	QAS(-31.44)PQNLGS(-10.11)S(-10.98)GLLHPQMS(10.11)PLLHS(-18.63)LVGQHILS(-23.51)VK	18	0.00038878	58.722	5	711.573	0.54312	+	0.0822826	0.523551	0.263357	3	0.28973	0.221813	0.17484	0.113459	0.152594	0.374533	3	0.213529	0.1408	0.121752
1150	D3Z194;D3YTT6;Q9DBS9;F8WH20	369;369;338;338	S	D3Z194;Q9DBS9	S369	Oxysterol-binding protein;Oxysterol-binding protein-related protein 3	Osbpl3	SVEREKLKQLMELDTSPSPSAQVVGLKHALS	QLMELDT(0.008)S(0.991)PS(0.001)PSAQVVGLK	QLMELDT(-21.05)S(21.05)PS(-29.84)PS(-57.41)AQVVGLK	8	7.90622e-142	208.61	2	1040.51	-0.19874	+	0.336079	0.406472	0.45932	3	0.400624	0.0618282	0.04529	0.183938	0.170027	0.187274	3	0.180413	0.00914782	0.122325
4796	P37913;Q3U4X8;D3YUC0;E9PV36;D3YUW4	65;81;81;81;81	S	P37913	S65	DNA ligase 1;DNA ligase	Lig1	DSPVKRTGRKVAQVLSCEGEDEDEAPGTPKV	VAQVLS(1)CEGEDEDEAPGTPK	VAQVLS(76.47)CEGEDEDEAPGT(-76.47)PK	6	1.21895e-09	108.3	2	1105.96	-1.0451	+	0.237921	0.454586	0.0230268	3	0.238511	0.21578	0.340093	0.164677	0.114844	0.292362	3	0.190628	0.0915596	0.122325
6530	Q5SV85;Q5SV85-2	576;497	S	Q5SV85	S576	Synergin gamma	Synrg	GTDDGFTDFKTADSVSPLEPPTKDTFPSAFA	TADSVS(1)PLEPPTK	T(-76.12)ADS(-36.61)VS(36.61)PLEPPT(-104.15)K	6	1.27455e-112	210.67	2	711.332	0.88113	+	0.325803	0.375773	0.345371	3	0.348982	0.0251802	0.0677251	0.127279	0.170702	0.253397	3	0.183792	0.0640701	0.122389
13932	Q9QYF9;Q8VCV2	329;342	T	Q9QYF9	T329	Protein NDRG3	Ndrg3	GYIPSASMTRLARSRTHSTSSSIGSGESPFS	S(0.152)RT(0.78)HS(0.05)T(0.016)S(0.001)S(0.001)SIGSGESPFSR	S(-7.1)RT(7.1)HS(-11.96)T(-16.77)S(-27.71)S(-31.62)S(-35.46)IGS(-50.28)GES(-63.33)PFS(-70.45)R	3	5.76977e-30	175.74	3	682.967	-0.42914	+		0.570379	0.224004	2	0.397192	0.244925	0.0951657		0.17406	0.188633	2	0.181346	0.0103047	0.122389
1582	D6RE33;G5E896;F6ZJ27;Q3UJB9;Q3UJB9-2;F6V5I7	620;680;261;680;680;256	S	D6RE33	S620	Enhancer of mRNA-decapping protein 4	Edc4	DGSLTLNSSSSSLQASPRSLLPGLLPGPADK	LQLDGSLTLNSSSSSLQAS(1)PR	LQLDGS(-171.77)LT(-152.66)LNS(-103.26)S(-101.01)S(-91.85)S(-70.73)S(-63.4)LQAS(63.4)PR	19	3.98121e-235	236.07	2	1121.04	-1.8616	+	0.400192	0.342245	0.465352	3	0.402597	0.0615888	0.0452176	0.127715	0.153723	0.270941	3	0.184126	0.0762995	0.124951
9357	Q8K3X4	69	S	Q8K3X4	S69	Interferon regulatory factor 2-binding protein-like	Irf2bpl	ARQLKRAHGCFQDGRSPGPPPPVGVKTVALS	RAHGCFQDGRS(1)PGPPPPVGVK	RAHGCFQDGRS(73.95)PGPPPPVGVK	11	0.0146166	78.166	4	574.776	-2.6994	+	0.333629	0.37858		2	0.356104	0.0317851	0.0557906	0.122911	0.242392		2	0.182652	0.0844861	0.124951
652	Q66JQ7;A3KGI3	794;794	S	Q66JQ7	S794	Protein CASC5	Casc5	EINRSHTTPLECKIISPSDITPGDLDKTMMS	IIS(1)PSDITPGDLDK	IIS(40.07)PS(-40.07)DIT(-106.8)PGDLDK	3	1.40193e-263	257.72	2	775.871	0.38487	+	0.38851	0.240948	0.453174	3	0.360877	0.108778	0.06882	0.138974	0.179408	0.214037	3	0.177473	0.0375691	0.124951
3610	P49117;Q3ZAR9;G3X9W4	219;219;252	S	P49117	S219	Nuclear receptor subfamily 2 group C member 2	Nr2c2	CAASTEKIYIRKDLRSPLIATPTFVADKDGA	DLRS(1)PLIATPTFVADK	DLRS(84.79)PLIAT(-84.79)PT(-123.56)FVADK	4	4.83937e-12	161.82	3	608.648	-0.51972	+	0.234365	0.211174	0.354038	3	0.266526	0.0766696	0.124296	0.142426	0.117801	0.328818	3	0.196349	0.115381	0.124951
4851	P43346	74	S	P43346	S74	Deoxycytidine kinase	Dck	CNVQSTQEEFEELTTSQKSGGNVLQMMYEKP	WCNVQSTQEEFEELTT(0.014)S(0.986)QK	WCNVQS(-160.9)T(-145.39)QEEFEELT(-39.3)T(-18.36)S(18.36)QK	17	1.08963e-140	193.38	2	1212.51	-0.094192	+	0.0451273	0.19407	0.322393	3	0.187197	0.138761	0.30754	0.130387	0.119289	0.441567	3	0.230414	0.182948	0.124951
3832	Q6A065;H7BX26;Q6A065-3	1407;1397;140	S	Q6A065	S1407	Centrosomal protein of 170 kDa	Cep170	AEHPDHLTITRRRTWSRDEVMGDNLLLSSVF	T(0.22)WS(0.78)RDEVMGDNLLLSSVFQFSRK	T(-5.49)WS(5.49)RDEVMGDNLLLS(-61.91)S(-64.79)VFQFS(-71.73)RK	3	2.82195e-11	122	4	699.586	0.60834	+	0.345001		-0.572663	2	-0.113831	0.648886	0.920188	0.12436		0.298924	2	0.211642	0.123436	0.12809
5582	Q05AH6;Q05AH6-2	223;223	S	Q05AH6	S223	Uncharacterized protein C11orf84 homolog		IEQGNKKPRGQRWKESPENEPARKKRSRHMT	WKES(1)PENEPARK	WKES(87.14)PENEPARK	4	0.00294878	103.66	3	517.571	-2.4198	+	0.129432	0.170232	0.583409	3	0.294358	0.251156	0.155639	0.185466	0.0922292	0.35162	3	0.209772	0.131393	0.128851
7043	Q62523	272	S	Q62523	S272	Zyxin	Zyx	FAPVAPKFTPVVSKFSPGAPSGPGPQPNQKM	FT(0.026)PVVS(0.022)KFS(0.951)PGAPSGPGPQPNQK	FT(-15.56)PVVS(-16.37)KFS(15.56)PGAPS(-34.61)GPGPQPNQK	9	3.28864e-09	116.24	4	601.798	-1.1887	+	0.139627	0.12395	-0.0342273	3	0.0764499	0.0961692	0.79577	0.20963	0.145569	0.184728	3	0.179976	0.0322938	0.128851
8105	Q80Y44	522	S	Q80Y44	S522	Probable ATP-dependent RNA helicase DDX10	Ddx10	VAPRIRFLQKLEKQPSTELVKNPVTEAVPPR	QPS(0.995)T(0.005)ELVK	QPS(22.61)T(-22.61)ELVK	3	0.000812831	98	2	491.236	-0.64854	+	0.401366	0.393136	0.455213	3	0.416572	0.0337162	0.0413565	0.11213	0.154728	0.316089	3	0.194316	0.107588	0.129007
3043	Q8BX90;F6TLV3;E0CXY0	203;159;203	S	Q8BX90	S203	Fibronectin type-III domain-containing protein 3A	Fndc3a	KKLKDRQGTQKDKMSSPPPSPQKCPSPISEH	MS(0.07)S(0.93)PPPSPQK	MS(-11.25)S(11.25)PPPS(-40.78)PQK	3	0.00122957	96.067	2	568.246	-2.457	+		0.17693	0.406736	2	0.291833	0.162497	0.128108		0.0939817	0.391399	2	0.24269	0.210306	0.129007
10751	Q9ERG0;Q9ERG0-2	599;439	S	Q9ERG0	S599	LIM domain and actin-binding protein 1	Lima1	ERSRPFTVAASFRTSSIKSPKASSPSLRKGW	T(0.012)S(0.056)S(0.931)IKS(0.001)PK	T(-19.03)S(-12.21)S(12.21)IKS(-28.59)PK	3	0.0107124	84.31	2	464.231	1.5713	+	0.425795	0.501141	0.395094	3	0.440677	0.0545676	0.0394209	0.165554	0.136752	0.218783	3	0.173696	0.0416173	0.129998
8895	Q8C6E0;Q5SNY8	85;74	S	Q8C6E0	S85	Coiled-coil domain-containing protein 104	Ccdc104	KEIGINEDQFQEACTSPLAKTRTSQAILQPV	EIGINEDQFQEACT(0.002)S(0.998)PLAK	EIGINEDQFQEACT(-27.3)S(27.3)PLAK	15	5.61332e-72	171.13	3	743.996	-1.1418	+	0.531517	0.428928	0.482039	3	0.480828	0.0513053	0.0283392	0.217728	0.20723	0.150458	3	0.191805	0.0361908	0.130245
1598	P70268;D6RH37;P70268-2	346;358;351	S	P70268	S346	Serine/threonine-protein kinase N1	Pkn1	VRVVGCKNLPETIPWSPPPSVGASGTPESRT	NLPETIPWS(0.997)PPPS(0.002)VGAS(0.001)GT(0.001)PESR	NLPET(-86.76)IPWS(27.71)PPPS(-27.71)VGAS(-32.27)GT(-30.89)PES(-39.46)R	9	3.87927e-27	133.61	2	1228.58	0.48713	+	0.463176	0.375792	0.333229	3	0.390732	0.0662492	0.0554943	0.137267	0.233148	0.186826	3	0.185747	0.0479501	0.130245
12432	Q6ZQ58;J3QNB1	762;762	T	Q6ZQ58	T762	La-related protein 1	Larp1	TVPESPNYRNARTPRTPRTPQLKDSSQTPRF	T(0.999)PRT(0.001)PQLK	T(30.37)PRT(-30.37)PQLK	1	0.016905	95.483	2	510.766	0.59546	+	0.434122	0.441899	0.441832	3	0.439284	0.00447104	0.0364366	0.165955	0.149773	0.200866	3	0.172198	0.0261125	0.130804
10553	Q9D8U8	20	S	Q9D8U8	S20	Sorting nexin-5	Snx5	PELLEQQEEDRSKLRSVSVDLNVDPSLQIDI	LRS(0.813)VS(0.176)VDLNVDPS(0.011)LQIDIPDALSERDK	LRS(6.64)VS(-6.64)VDLNVDPS(-18.76)LQIDIPDALS(-59.19)ERDK	3	7.44834e-24	139.25	3	1025.52	-0.44152	+	0.571453	0.567826	0.384229	3	0.507836	0.107062	0.0304126	0.136713	0.14264	0.252441	3	0.177264	0.0651719	0.131364
8838	Q8C1D8	667	S	Q8C1D8	S667	Protein IWS1 homolog	Iws1	EQRDLEQMPQRRRLSSTGGQTPRRDLEKVLT	RLS(0.012)S(0.896)T(0.091)GGQT(0.001)PR	RLS(-18.76)S(9.93)T(-9.93)GGQT(-31.81)PR	4	0.00358168	108.23	3	413.866	0.31117	+	0.802185	0.357592	0.724481	3	0.628086	0.237455	0.0208211	0.12462	0.194625	0.215254	3	0.178167	0.0475057	0.131396
10488	Q9D5K4;Q9D5K4-2;Q9D5K4-4;Q9D5K4-3;E9Q5M3	294;294;175;216;252	S	Q9D5K4	S294	S100P-binding protein	S100pbp	LGKVIPVLQTRTRMFSQSELEKQKDIYLSKV	T(0.003)RMFS(0.997)QS(0.001)ELEK	T(-25.41)RMFS(25.41)QS(-32.46)ELEK	5	0.000217269	115.04	3	479.214	0.74033	+		0.571651	0.418471	2	0.495061	0.108314	0.0327627		0.178171	0.178061	2	0.178116	7.77706e-05	0.131396
8069	Q80XK6;Q80XK6-5	381;381	S	Q80XK6	S381	Autophagy-related protein 2 homolog B	Atg2b	IQMELNRYYLRKDSLSMGVSSEKSFYETETA	KDS(0.135)LS(0.861)MGVS(0.003)S(0.001)EK	KDS(-8.04)LS(8.04)MGVS(-25.27)S(-29.22)EK	5	0.0115167	79.347	3	449.867	-2.7579	+	0.480855	0.18418		2	0.332517	0.20978	0.104075	0.223924	0.115311		2	0.169617	0.0768009	0.131396
14178	Q9D5K4;Q9D5K4-2;Q9D5K4-4;Q9D5K4-3;E9Q5M3	290;290;171;212;248	T	Q9D5K4	T290	S100P-binding protein	S100pbp	GERRLGKVIPVLQTRTRMFSQSELEKQKDIY	T(0.996)RMFS(0.004)QSELEK	T(24.47)RMFS(-24.47)QS(-40.42)ELEK	1	0.00380871	87.447	3	479.214	-0.31676	+	0.698475	0.708106		2	0.70329	0.00681064	0.00741004	0.140189	0.171053		2	0.155621	0.021824	0.131827
9935	Q923D5	600	S	Q923D5	S600	WW domain-binding protein 11	Wbp11	VRRENKGATAVPQRRSEDDSAVPVAKAAPRS	GATAVPQRRS(0.955)EDDS(0.045)AVPVAK	GAT(-38.86)AVPQRRS(13.28)EDDS(-13.28)AVPVAK	10	0.0139821	82.121	3	712.014	-1.1936	+	0.641147	0.560253	0.756788	3	0.652729	0.0987781	0.011356	0.108078	0.230142	0.231451	3	0.18989	0.0708545	0.131827
10554	Q9D8U8	22	S	Q9D8U8	S22	Sorting nexin-5	Snx5	LLEQQEEDRSKLRSVSVDLNVDPSLQIDIPD	S(0.049)VS(0.951)VDLNVDPSLQIDIPDALSERDK	S(-12.86)VS(12.86)VDLNVDPS(-88.79)LQIDIPDALS(-163.08)ERDK	3	4.86071e-55	170.59	3	935.79	1.2958	+	0.476223	0.445729	0.475409	3	0.465787	0.0173757	0.0309204	0.178847	0.17438	0.173802	3	0.175676	0.00276104	0.131827
7048	Q63850	412	S	Q63850	S412	Nuclear pore glycoprotein p62	Nup62	LDFILSQQKELEDLLSPLEESVKEQSGTIYL	ELEDLLS(1)PLEESVK	ELEDLLS(80.52)PLEES(-80.52)VK	7	0	292.45	3	560.938	-0.98358	+	0.366124	0.269466	0.413132	3	0.349574	0.0732486	0.0696483	0.202027	0.0999912	0.254636	3	0.185551	0.0786279	0.131827
8445	Q8BQ30;Q8BQ30-2	212;212	S	Q8BQ30	S212	Phostensin	Ppp1r18	ETPEESLRLAGSGDDSPKRKEVLESILSPGE	LSPGETPEESLRLAGSGDDS(1)PK	LS(-79.04)PGET(-74.45)PEES(-64.33)LRLAGS(-43.1)GDDS(43.1)PK	20	0.00363824	81.477	3	774.688	1.3805	+	0.0801573	0.410068	0.111961	3	0.200729	0.181989	0.308493	0.13444	0.116973	0.317638	3	0.189684	0.111156	0.132565
8439	Q8BPU7;Q8BPU7-3	31;31	S	Q8BPU7	S31	Engulfment and cell motility protein 1	Elmo1	GAYPKLMEIDQKKPLSAIIKEVCDGWSLANH	KPLS(1)AIIK	KPLS(75.57)AIIK	4	0.00108351	101.71	3	317.188	-0.87544	+	0.20561	0.193542	0.175204	3	0.191452	0.0153105	0.222574	0.165706	0.147274	0.199214	3	0.170732	0.0263321	0.13313
3847	Q8K3Z9;H7BX32	440;440	S	Q8K3Z9	S440	Nuclear envelope pore membrane protein POM 121	Pom121	PAKKTREEEPCQQSSSSPPLVTDKESPGEKV	TREEEPCQQS(0.001)S(0.003)S(0.912)S(0.084)PPLVTDK	T(-55.12)REEEPCQQS(-30.65)S(-24.58)S(10.34)S(-10.34)PPLVT(-44.14)DK	12	1.38878e-08	116.73	3	785.677	2.4685	+	0.170672	0.0704073		2	0.12054	0.0708981	0.410665	0.113143	0.263139		2	0.188141	0.106063	0.133263
4715	P31938;Q63932;Q91YS7	218;222;222	S	P31938;Q63932	S218	Dual specificity mitogen-activated protein kinase kinase 1;Dual specificity mitogen-activated protein kinase kinase 2	Map2k1;Map2k2	EIKLCDFGVSGQLIDSMANSFVGTRSYMSPE	LCDFGVSGQLIDS(0.876)MANS(0.124)FVGTR	LCDFGVS(-53.3)GQLIDS(8.49)MANS(-8.49)FVGT(-34.17)R	13	1.86851e-12	108.5	3	824.031	-0.045712	+	0.59261		0.48221	2	0.53741	0.078064	0.0229732	0.127681		0.268822	2	0.198251	0.0998023	0.134874
1074	Q80TH2;Q80TH2-2;Q80TH2-1;B7ZNX6	829;829;829;829	S	Q80TH2	S829	Protein LAP2	Erbb2ip	ESINKVNGLCEDTAPSPGRVEPQKASSSADV	VNGLCEDTAPS(1)PGRVEPQK	VNGLCEDT(-42.43)APS(42.43)PGRVEPQK	11	3.03024e-05	104.42	3	711.993	-0.62896	+	0.398704	0.392046	0.590084	3	0.460278	0.112465	0.0327627	0.20737	0.12133	0.198521	3	0.17574	0.047328	0.135007
653	Q66JQ7;A3KGI3	796;796	S	Q66JQ7	S796	Protein CASC5	Casc5	NRSHTTPLECKIISPSDITPGDLDKTMMSID	IIS(0.216)PS(0.784)DITPGDLDK	IIS(-5.6)PS(5.6)DIT(-39.87)PGDLDK	5	1.6985e-43	173.77	2	775.871	1.7137	+	0.400952	0.37116		2	0.386056	0.0210661	0.0452176	0.122946	0.203577		2	0.163261	0.0570149	0.136108
5138	P59114	146	S	P59114	S146	Phosphorylated CTD-interacting factor 1	Pcif1	EIPVTPTSQSVPSSPSIPGTPTLKIWGSSTE	IEIPVTPTSQSVPS(0.031)S(0.031)PS(0.918)IPGT(0.019)PT(0.001)LK	IEIPVT(-52.48)PT(-40.91)S(-40.91)QS(-34.22)VPS(-14.71)S(-14.71)PS(14.71)IPGT(-16.93)PT(-29.53)LK	17	2.5913e-16	110.16	3	871.786	0.69661	+	0.301984		0.399997	2	0.350991	0.0693053	0.0706791	0.153317		0.217169	2	0.185243	0.0451506	0.136108
3155	Q3UHK8;F6ZMJ4	1639;1639	S	Q3UHK8	S1639	Trinucleotide repeat-containing gene 6A protein	Tnrc6a	AQSTSARNSDSKLTWSPGSVTNTSLAHELWK	LT(0.032)WS(0.947)PGS(0.018)VT(0.003)NTSLAHELWK	LT(-14.7)WS(14.7)PGS(-17.21)VT(-25.41)NT(-36.71)S(-42.1)LAHELWK	4	2.37548e-05	91.065	3	736.356	-0.35046	+		0.331063	0.202601	2	0.266832	0.0908362	0.146343		0.0930363	0.340968	2	0.217002	0.175315	0.136108
12895	P97287;P97287-2	144;98	T	P97287	T144	Induced myeloid leukemia cell differentiation protein Mcl-1 homolog	Mcl1	SEAAKSSGADGSLPSTPPPPEEEEDDLYRQS	SSGADGS(0.001)LPS(0.229)T(0.757)PPPPEEEEDDLY(0.003)RQS(0.004)LEIIS(0.005)R	S(-42.39)S(-42.39)GADGS(-28.24)LPS(-5.2)T(5.2)PPPPEEEEDDLY(-23.52)RQS(-22.39)LEIIS(-21.62)R	11	6.30413e-06	83.179	3	1184.54	1.9238	+	0.139942	0.326213		2	0.233077	0.131713	0.153981	0.174405	0.1329		2	0.153652	0.0293487	0.136156
4509	P15864;P43274;P43276;P43277;Q07133;I7HFT9	104;104;104;105;106;107	S	P15864;P43274;P43276;P43277	S104	Histone H1.2;Histone H1.4;Histone H1.5;Histone H1.3;Histone H1t	Hist1h1c;Hist1h1e;Hist1h1b;Hist1h1d;Hist1h1t	SKGILVQTKGTGASGSFKLNKKAASGEAKPQ;SKGTLVQTKGTGASGSFKLNKKAASGEAKPK	GTGAS(0.024)GS(0.976)FK	GT(-45.84)GAS(-16.1)GS(16.1)FK	7	0.00182314	99.539	2	446.184	0.08106	+	-0.0626727		-0.0231701	2	-0.0429214	0.0279326	0.563736	0.173155		0.195949	2	0.184552	0.0161183	0.139099
1599	Q925N1;F8WI63;D6RHK7	34;34;34	S	Q925N1	S34	Sideroflexin-4	Sfxn4	FCQWMDLLDPVNMFISIGSIEKSRQLLFTTE	RFCQWMDLLDPVNMFIS(0.997)IGS(0.003)IEK	RFCQWMDLLDPVNMFIS(25.61)IGS(-25.61)IEK	17	0.00223372	51.524	3	960.449	-3.2127	+	0.709635	0.595838	0.658585	3	0.654686	0.0569985	0.0112879	0.292924	0.267336	0.120893	3	0.227051	0.0928217	0.139146
13856	Q8K3K8	529	T	Q8K3K8	T529	Optineurin	Optn	SRQSLMEMQCRHGARTSDSDQQTYLFQRGAE	HGART(0.849)S(0.129)DS(0.021)DQQTYLFQR	HGART(8.17)S(-8.17)DS(-15.97)DQQT(-46.84)Y(-56.81)LFQR	5	0.000264549	101.49	4	523.233	1.3881	+	0.659289	0.646423	0.339799	3	0.548504	0.180858	0.0312429	0.129075	0.181443	0.19885	3	0.16979	0.0363178	0.141767
8217	Q8BGS1;Q8BGS1-3	455;463	S	Q8BGS1	S455	Band 4.1-like protein 5	Epb41l5	QHDRKCLPLSVDLLNSPDLLETTIGDVTRTS	CLPLSVDLLNS(1)PDLLETTIGDVTR	CLPLS(-63.08)VDLLNS(50.03)PDLLET(-50.03)T(-55.26)IGDVT(-55.26)R	11	7.08184e-68	159.98	2	1361.17	-2.0277	+	0.414455	0.351816	0.512226	3	0.426165	0.0808435	0.0401292	0.171166	0.103701	0.258904	3	0.177924	0.0778216	0.141767
9384	Q8R080	726	S	Q8R080	S726	G2 and S phase-expressed protein 1	Gtse1	ELGQLIDLGSPLIQLSPEADKENVDSPLLKF	AELGQLIDLGSPLIQLS(1)PEADK	AELGQLIDLGS(-85.16)PLIQLS(85.16)PEADK	17	3.81851e-82	171.94	3	796.408	-0.68114	+	0.178747	0.28567	0.317151	3	0.260523	0.0725481	0.128108	0.121708	0.129787	0.298225	3	0.18324	0.0996618	0.141767
13916	Q8R4R6;A2ATJ2	128;128	T	Q8R4R6	T128	Nucleoporin NUP53	Nup35	QANISLLQSPLVGATTPVPGQSMFSPANIGQ	QANISLLQSPLVGAT(0.171)T(0.808)PVPGQS(0.009)MFS(0.012)PANIGQPRK	QANIS(-75.53)LLQS(-68.41)PLVGAT(-6.74)T(6.74)PVPGQS(-19.66)MFS(-18.37)PANIGQPRK	16	7.35732e-31	112.06	4	896.963	-0.92558	+	0.459679	0.398201		2	0.42894	0.0434718	0.0358398	0.120577	0.199837		2	0.160207	0.0560454	0.141826
3128	O88286;G5E8J8;O88286-2;F6ZBR8;O88286-3	1550;821;822;839;848	S	O88286	S1550	Protein Wiz	Wiz	EAGRAADSGERPLATSPPGTVKSEEHQRQNI	AADSGERPLAT(0.054)S(0.811)PPGT(0.135)VK	AADS(-46.19)GERPLAT(-11.78)S(7.78)PPGT(-7.78)VK	12	0.0057271	78.228	3	611.963	-1.1413	+	0.267219	0.271563	0.361431	3	0.300071	0.0531838	0.0960748	0.119712	0.136816	0.280296	3	0.178941	0.0881912	0.141826
6230	Q9Z1S8;Q3ZB57	395;395	S	Q9Z1S8	S395	GRB2-associated-binding protein 2	Gab2	AATIPRRNTLPAMDNSRLHRASSCETYEYPA	RNT(0.004)LPAMDNS(0.996)R	RNT(-23.55)LPAMDNS(23.55)R	10	2.08892e-05	109.55	2	677.8	0.37805	+	0.262807		0.269315	2	0.266061	0.00460163	0.129111	0.159423		0.202649	2	0.181036	0.0305653	0.141826
3628	G5E837	465	S	G5E837	S465		Hcfc2	SKPDSRAVDSSAALHSPLAPNTSNNSSWVTD	AVDS(0.001)S(0.001)AALHS(0.998)PLAPNTSNNSSWVTDMLRK	AVDS(-31.31)S(-30.86)AALHS(30.86)PLAPNT(-43.14)S(-45.23)NNS(-48.39)S(-48.39)WVT(-63.27)DMLRK	10	3.31609e-11	80.981	4	788.124	-1.3705	+		0.27277	0.358863	2	0.315816	0.0608773	0.0924211		0.133794	0.203863	2	0.168829	0.049546	0.141877
6875	Q61687;F6RDB7	719;608	S	Q61687	S719	Transcriptional regulator ATRX	Atrx	VPKAKQPVIGDQNSDSDEMLAVLKEASQMGH	AKQPVIGDQNS(1)DS(1)DEMLAVLK	AKQPVIGDQNS(125.51)DS(125.51)DEMLAVLK	13	2.77315e-10	132.78	3	806.693	-0.15152	+	0.013848	-0.0395245		2	-0.0128382	0.03774	0.867769	0.148595	0.149589		2	0.149092	0.000702649	0.141928
5009	P52479;P52479-2	223;224	S	P52479	S223	Ubiquitin carboxyl-terminal hydrolase 10	Usp10	SPQNPVDFISGPVPDSPFPRTLGGDARTAGL	T(0.583)CDS(0.417)PQNPVDFISGPVPDS(1)PFPR	T(1.46)CDS(-1.46)PQNPVDFIS(-82.24)GPVPDS(82.24)PFPR	19	3.33093e-126	195.97	3	897.04	1.5468	+	0.71163	0.539214	0.462912	3	0.571252	0.127417	0.0208309	0.169565	0.229912	0.151312	3	0.183597	0.0411357	0.142476
11099	Q9R0L6;Q9R0L6-2	93;93	S	Q9R0L6	S93	Pericentriolar material 1 protein	Pcm1	KIPHTFPHSRYMTQMSVPEQAELEKLKQRIN	YMTQMS(1)VPEQAELEK	Y(-134.45)MT(-73.36)QMS(73.36)VPEQAELEK	6	1.77452e-114	202.86	2	932.399	-0.084833	+	0.277426	0.340166	0.230084	3	0.282559	0.0552205	0.114766	0.136814	0.168527	0.195983	3	0.167108	0.0296102	0.142476
8421	Q8BMK1	137	S	Q8BMK1	S137	Methyltransferase-like protein 2	Mettl2	VCEDGPGLTAEQHKCSCASPGCETQVPPLEE	CS(0.93)CAS(0.014)PGCET(0.056)QVPPLEEPVTQK	CS(12.21)CAS(-18.21)PGCET(-12.21)QVPPLEEPVT(-56.01)QK	2	0.000507986	60.561	3	852.027	1.3215	+		0.685079	0.694477	2	0.689778	0.00664544	0.00854358		0.133986	0.200067	2	0.167026	0.0467265	0.143871
933	B2RQG2	1529	S	B2RQG2	S1529		Phf3	KNSGEETSSVGSSSISPGPLASLSLRGKPPD	NSGEETSSVGSSSIS(1)PGPLASLSLR	NS(-117.27)GEET(-110.35)S(-105.66)S(-105.66)VGS(-72.45)S(-57.75)S(-46.99)IS(46.99)PGPLAS(-65.65)LS(-81.09)LR	15	2.99909e-136	200.16	3	833.725	0.96712	+	0.520457	0.523291	0.539448	3	0.527732	0.0102446	0.0222456	0.119072	0.181243	0.209201	3	0.169839	0.0461342	0.143871
2673	E9Q9Q2	299	S	E9Q9Q2	S299		R3hdm1	EEREEEYQRARDRIFSQDSLCSQENYIIDKR	DRIFS(0.996)QDS(0.004)LCSQENYIIDK	DRIFS(23.87)QDS(-23.87)LCS(-65.76)QENY(-84.39)IIDK	5	9.97022e-07	111.33	3	804.358	-3.7616	+	0.371437	0.438131	0.570393	3	0.459987	0.101263	0.0325765	0.150894	0.0915966	0.374605	3	0.205699	0.149252	0.143871
31	Q62077;A2A4A6	1221;1221	S	Q62077	S1221	1-phosphatidylinositol 4,5-bisphosphate phosphodiesterase gamma-1	Plcg1	LIKIDIFPAKENGDLSPFSGISLRERASDAS	ENGDLS(0.998)PFS(0.001)GISLR	ENGDLS(28.89)PFS(-28.89)GIS(-35.74)LR	6	0.000109393	115.56	2	786.359	-0.35384	+	0.580629	0.418898	0.425228	3	0.474918	0.0916026	0.0327627	0.119569	0.150265	0.243417	3	0.171084	0.0644952	0.143871
11322	Q9Z2X1;J3QM80;Q9Z2X1-2;J3QMT0;J3QMQ5	104;104;84;104;104	S	Q9Z2X1	S104	Heterogeneous nuclear ribonucleoprotein F;Heterogeneous nuclear ribonucleoprotein F, N-terminally processed	Hnrnpf;Gm6430	HRTEMDWVLKHSGPNSADSANDGFVRLRGLP	HSGPNS(1)ADSANDGFVR	HS(-59.13)GPNS(45.9)ADS(-45.9)ANDGFVR	6	7.76594e-70	185.06	2	855.847	2.1142	+	0.408002	0.370421	0.41944	3	0.399288	0.0256454	0.0469789	0.171482	0.216799	0.150507	3	0.179596	0.0338828	0.143871
12121	Q80TY5;E9QKX5	3044;3024	T	Q80TY5	T3044	Vacuolar protein sorting-associated protein 13B	Vps13b	NTVHKTLAIKLVHNLTSPKWKDGGNGEVVTL	LVHNLT(0.908)S(0.092)PK	LVHNLT(9.92)S(-9.92)PK	6	0.00387502	102.53	2	544.779	0.70519	+	0.446599	0.404988	0.356695	3	0.402761	0.0449933	0.0486297	0.14677	0.0986091	0.314464	3	0.186615	0.113309	0.143871
2990	Q9JIX8;F6RJ39;Q9JIX8-4;Q9JIX8-3;Q9JIX8-2;B8JJ91;Q52KR6;B8JJ92;B8JJ90	863;809;823;90;106;159;89;105;172	S	Q9JIX8	S863	Apoptotic chromatin condensation inducer in the nucleus	Acin1	KRRWGASTAATQKKPSISITTESLKSLIPDI	KPS(0.976)IS(0.023)IT(0.001)TESLK	KPS(16.27)IS(-16.27)IT(-29.03)T(-48.46)ES(-52.54)LK	3	0.00255659	77.24	3	461.909	1.3146	+	0.288562	0.417339	0.486716	3	0.397539	0.10055	0.0497032	0.0733181	0.260215	0.355946	3	0.229826	0.143743	0.143871
1112	D6RJK7;B9EKI3	359;359	S	D6RJK7	S359	TATA element modulatory factor	Tmf1	LPGKGYALVPIIVSPSTPKTKVVESTEENAE	GYALVPIIVS(0.051)PS(0.777)T(0.172)PK	GY(-70.45)ALVPIIVS(-11.79)PS(6.55)T(-6.55)PK	12	5.83368e-05	114.87	3	541.292	-1.2025	+	0.430285	0.220892	0.526207	3	0.392461	0.156132	0.0654684	0.181768	0.180126	0.158716	3	0.173536	0.0128613	0.143871
13990	Q91YK2	702	T	Q91YK2	T702	Ribosomal RNA processing protein 1 homolog B	Rrp1b	PLHGVLKTATSSPASTPLSPMRLPATTPKRR	TATSSPAS(0.039)T(0.877)PLS(0.084)PMRLPATTPK	T(-41.85)AT(-41.85)S(-49.19)S(-37.51)PAS(-13.49)T(10.21)PLS(-10.21)PMRLPAT(-84.27)T(-95.45)PK	9	4.52933e-33	173.36	2	1146.57	0.26917	+	0.237921	0.277265		2	0.257593	0.0278209	0.113512	0.147441	0.148356		2	0.147898	0.000647079	0.143871
2782	Q9D1F4;E9QKI5;E9QKI4;F6R8S6	184;210;255;193	S	Q9D1F4	S184	Proline-rich AKT1 substrate 1	Akt1s1	PQPPATALPTQQYAKSLPVSVPVWAFKEKRT	S(1)LPVSVPVWAFK	S(87.46)LPVS(-87.46)VPVWAFK	1	2.01193e-63	193.45	2	705.365	-0.33567	+	0.490633	0.500648	0.53566	3	0.50898	0.0236415	0.0235944	0.16647	0.16468	0.170735	3	0.167295	0.00311054	0.144283
10640	Q9DBR7	994	S	Q9DBR7	S994	Protein phosphatase 1 regulatory subunit 12A	Ppp1r12a	LEMEKRERRALERRISEMEEELKMLPDLKAD	RIS(1)EMEEELK	RIS(72.53)EMEEELK	3	0.00682049	72.531	3	448.535	0.46948	+	0.234036	0.272561		2	0.253299	0.0272412	0.116414	0.150151	0.143327		2	0.146739	0.00482507	0.146109
13022	Q3U9G9	212	T	Q3U9G9	T212	Lamin-B receptor	Lbr	LVTKGPAPLGTFQVTTPQRKDLEFGGVPGAV	GPAPLGTFQVT(0.054)T(0.946)PQRK	GPAPLGT(-38.59)FQVT(-12.43)T(12.43)PQRK	12	0.00132961	85.046	3	593.305	-1.3562	+	0.183042	0.0482864	0.22224	3	0.151189	0.0912463	0.383438	0.166177	0.101747	0.248151	3	0.172025	0.0733772	0.146231
12784	P52479;P52479-2	566;567	T	P52479	T566	Ubiquitin carboxyl-terminal hydrolase 10	Usp10	NGPRSDLIEDEELEDTGKGSEDEWEQVGPKN	SDLIEDEELEDT(0.823)GKGS(0.177)EDEWEQVGPK	S(-55.76)DLIEDEELEDT(6.68)GKGS(-6.68)EDEWEQVGPK	12	1.01917e-05	79.935	3	1005.43	0.17721	+	-0.0173625		0.611064	2	0.296851	0.444365	0.614247	0.464871		0.140712	2	0.302791	0.229215	0.146231
4852	P46061	429	S	P46061	S429	Ran GTPase-activating protein 1	Rangap1	RKILDPNSGEPAPVLSSPTPTDLSTFLSFPS	ILDPNS(0.009)GEPAPVLS(0.784)S(0.144)PT(0.048)PT(0.003)DLS(0.005)T(0.005)FLS(0.001)FPSPEK	ILDPNS(-19.32)GEPAPVLS(7.35)S(-7.35)PT(-12.12)PT(-23.63)DLS(-22.08)T(-22.08)FLS(-28.73)FPS(-34.83)PEK	14	1.3729e-14	86.886	3	1140.89	0.95245	+		0.367263	0.339438	2	0.35335	0.019675	0.0706791		0.20922	0.15683	2	0.183025	0.0370457	0.147888
11931	E9Q1P8	73	T	E9Q1P8	T73	Interferon regulatory factor 2-binding protein 2	Irf2bp2	QLKRAHGCFPEGRSPTGAQPAAAKPPPLSAK	S(0.169)PT(0.831)GAQPAAAKPPPLSAK	S(-6.92)PT(6.92)GAQPAAAKPPPLS(-68.3)AK	3	0.00430517	78.848	3	590.305	-0.35988	+	0.335016	0.212534		2	0.273775	0.0866082	0.111631	0.181913	0.118165		2	0.150039	0.0450761	0.148011
6233	Q9Z1S8;Q3ZB57	282;282	S	Q9Z1S8	S282	GRB2-associated-binding protein 2	Gab2	RSLASHGHTKSSLTGSETDNEDVYTFKMPSN	SSLTGS(0.997)ET(0.003)DNEDVYTFK	S(-71.99)S(-66.35)LT(-39.62)GS(25.47)ET(-25.47)DNEDVY(-160.18)T(-117.16)FK	6	8.96565e-232	239.19	2	986.907	-0.20634	+	0.661481	0.329276	-0.0247319	3	0.322008	0.343164	0.411535	0.166974	0.120113	0.204057	3	0.163715	0.042067	0.148011
12591	P09405	307	T	P09405	T307	Nucleolin	Ncl	APEAKKQKVEGSEPTTPFNLFIGNLNPNKSV	QKVEGS(0.026)EPT(0.091)T(0.883)PFNLFIGNLNPNK	QKVEGS(-15.33)EPT(-9.88)T(9.88)PFNLFIGNLNPNK	10	3.98295e-41	148.19	4	656.824	-0.21104	+	0.255779	0.62842	0.485877	3	0.456692	0.188027	0.0452176	0.0905991	0.203115	0.253942	3	0.182552	0.0835904	0.15057
931	B2RQG2	1112	S	B2RQG2	S1112		Phf3	CKICIGRMAPPIDDLSPKTVKVVVGGARKHS	MAPPIDDLS(1)PK	MAPPIDDLS(63.73)PK	9	0.000270397	118.16	3	421.861	0.87411	+	0.218641	0.180671	0.415307	3	0.271539	0.125946	0.129283	0.120331	0.111195	0.335339	3	0.188955	0.126855	0.151709
1490	D3Z656;Q8CHC4	1383;1350	S	D3Z656	S1383	Synaptojanin-1	Synj1	LSVLAVSKAQPSVQISPVLTPDPKMLIQLPS	AQPSVQIS(1)PVLTPDPK	AQPS(-61.74)VQIS(48.21)PVLT(-48.21)PDPK	8	2.88883e-57	176.61	2	878.948	-1.2125	+	0.32695	0.330109	0.328346	3	0.328468	0.00158319	0.0774612	0.13732	0.203386	0.168277	3	0.169661	0.0330549	0.15231
1311	Q8R3B7;D3YZC7;D3YZC8	268;268;268	S	Q8R3B7	S268	Bromodomain-containing protein 8	Brd8	SPQKKMLGQKATPPPSPLLSELLKKGSLLPT	MLGQKAT(1)PPPS(1)PLLSELLKK	MLGQKAT(70.41)PPPS(33.55)PLLS(-33.55)ELLKK	11	9.42833e-05	99.859	4	577.8	0.26154	+	0.415774	0.573834	0.473919	3	0.487843	0.0799446	0.0290264	0.0961778	0.149558	0.30223	3	0.182655	0.106939	0.1543
13541	Q80Y44	523	T	Q80Y44	T523	Probable ATP-dependent RNA helicase DDX10	Ddx10	APRIRFLQKLEKQPSTELVKNPVTEAVPPRA	LEKQPS(0.117)T(0.883)ELVK	LEKQPS(-8.77)T(8.77)ELVK	7	0.000780297	100.11	3	451.234	-0.23382	+	0.395763	0.395554		2	0.395658	0.000148181	0.0433354	0.116208	0.190107		2	0.153158	0.0522548	0.1543
12888	P83741;P83741-3;P83741-4;P83741-2;P83741-5;F7CZC4	1972;2230;1723;2221;1790;337	T	P83741	T1972	Serine/threonine-protein kinase WNK1	Wnk1	RTEDKVTELKKEGPVTSPPFRDSEQTVIPAV	EGPVT(0.789)S(0.21)PPFRDS(0.001)EQTVIPAVIPK	EGPVT(5.74)S(-5.74)PPFRDS(-29.15)EQT(-44.81)VIPAVIPK	5	0.000108275	88.504	3	848.763	-1.2094	+	0.266043		0.308865	2	0.287454	0.0302797	0.111245	0.155715		0.194282	2	0.174999	0.0272704	0.1543
12094	Q8BVU0;E9QAU9;E9Q892;B7ZWM8;B2RXP1	329;329;203;329;329	T	Q8BVU0	T329	Leucine-rich repeat and calponin homology domain-containing protein 3	Lrch3	NSVDSGDKRWSGNEPTDEFSDLPLRVAEITK	RWS(0.032)GNEPT(0.965)DEFS(0.003)DLPLRVAEITK	RWS(-14.79)GNEPT(14.79)DEFS(-25.43)DLPLRVAEIT(-55.35)K	8	2.29001e-05	103.14	3	914.104	1.7101	+	0.152044		0.240665	2	0.196354	0.0626645	0.220564	0.133837		0.221798	2	0.177817	0.062198	0.154906
7963	Q80UJ7	536	S	Q80UJ7	S536	Rab3 GTPase-activating protein catalytic subunit	Rab3gap1	CCIERKKARDEGKKTSLSDSTTSAYPGDAGK	KT(0.111)S(0.877)LS(0.012)DSTTSAYPGDAGK	KT(-8.96)S(8.96)LS(-18.75)DS(-45.91)T(-45.4)T(-45.4)S(-48.18)AY(-109.5)PGDAGK	3	2.90115e-21	151.42	2	933.412	-1.0661	+	0.941621	0.821664		2	0.881642	0.0848221	0.00319237	0.165325	0.121822		2	0.143574	0.030761	0.156393
11514	Q7TMY8;Q7TMY8-3;A2AFQ0;Q7TMY8-4	3661;3661;3662;3661	T	Q7TMY8	T3661	E3 ubiquitin-protein ligase HUWE1	Huwe1	LREYNLEQQRRAQCETLSPDGLPEEQPQTTK	AQCET(0.989)LS(0.011)PDGLPEEQPQTTK	AQCET(19.35)LS(-19.35)PDGLPEEQPQT(-92.07)T(-92.07)K	5	1.52498e-08	113.23	2	1155	1.316	+	0.360991	0.345922	0.255864	3	0.320926	0.0568469	0.0917935	0.151165	0.148047	0.182454	3	0.160555	0.0190291	0.156393
409	Q9R207;A2AMG5	398;398	S	Q9R207	S398	Nibrin	Nbn	EEVKIPGLEQSSRKLSQETFNIKEAPKPSSK	KLS(1)QETFNIK	KLS(58.72)QET(-58.72)FNIK	3	4.73623e-07	146.67	2	644.321	0.62853	+	0.295831	0.345629	0.436009	3	0.359156	0.0710614	0.0631146	0.116248	0.196176	0.188452	3	0.166959	0.0440864	0.158921
12380	Q60875;Q60875-5;H3BJU7;Q60875-4;H3BJX8;H3BJ45;H3BJ40;H3BKH9;H3BLF9;H3BJ59;H3BL15;Q60875-2;Q60875-3;H3BLJ1;H3BIX8	121;92;94;94;106;104;106;121;92;104;106;121;113;113;111	T	Q60875	T121	Rho guanine nucleotide exchange factor 2	Arhgef2	QSVSLRSKTTTRERPTSAIYPSDSFRQSLLG	ERPT(0.927)S(0.073)AIYPSDSFR	ERPT(11.02)S(-11.02)AIY(-45.91)PS(-75.37)DS(-81.17)FR	4	0.00442742	84.94	3	569.258	0.90429	+	0.185995	0.257847		2	0.221921	0.0508065	0.14851	0.124649	0.165689		2	0.145169	0.0290197	0.158983
6776	Q61165	801	S	Q61165	S801	Sodium/hydrogen exchanger 1	Slc9a1	GSSDSPSSQRIQRCLSDPGPHPEPGEGEPFI	CLS(1)DPGPHPEPGEGEPFIPK	CLS(65.92)DPGPHPEPGEGEPFIPK	3	8.6906e-07	104.49	3	747.329	-0.17748	+	0.585731	0.553592	0.587338	3	0.575554	0.0190365	0.0161043	0.154579	0.181472	0.15814	3	0.164731	0.0146074	0.159779
9352	Q8K3K8	530	S	Q8K3K8	S530	Optineurin	Optn	RQSLMEMQCRHGARTSDSDQQTYLFQRGAED	HGART(0.079)S(0.903)DS(0.019)DQQTYLFQR	HGART(-10.61)S(10.61)DS(-16.86)DQQT(-40.01)Y(-40.35)LFQR	6	0.000264549	101.49	3	697.308	-0.88783	+	0.659289	0.691099	0.683045	3	0.677811	0.0165386	0.00906146	0.129075	0.212534	0.165414	3	0.169008	0.0418451	0.161722
10261	Q9CT10	58	S	Q9CT10	S58	Ran-binding protein 3	Ranbp3	EDGNYCPPVKRERTSSLTHSEEKSSGFRLKP	TSS(1)LTHSEEK	T(-61.28)S(-41.55)S(41.55)LT(-57.58)HS(-70.09)EEK	3	1.77892e-137	229	2	599.753	-0.57379	+	0.603761	0.650512	0.570878	3	0.608384	0.0400176	0.0136328	0.131503	0.154607	0.190629	3	0.158913	0.0297975	0.161722
6205	Q3UZA1	68	S	Q3UZA1	S68	CapZ-interacting protein	Rcsd1	LFPPKVELGQNGEEKSPSGASHPPKIKVKSS	VELGQNGEEKS(0.968)PS(0.031)GAS(0.001)HPPK	VELGQNGEEKS(14.93)PS(-14.93)GAS(-29.15)HPPK	11	0.00208029	74.222	3	709.995	-0.040653	+	0.379324	0.616486	0.632383	3	0.542731	0.141738	0.0230948	0.0656834	0.244895	0.379479	3	0.230019	0.157426	0.161722
10586	Q9DB52	144	S	Q9DB52	S144	Protein FAM122A	Fam122a	ASPKRIDFIPVSPAPSPTRGIGKQCFSPSLQ	RIDFIPVSPAPS(0.998)PT(0.002)RGIGK	RIDFIPVS(-41.15)PAPS(26.35)PT(-26.35)RGIGK	12	4.87638e-05	131.96	3	696.705	-0.54104	+	0.504267	0.480409	0.470236	3	0.484971	0.0174679	0.0277814	0.188318	0.188704	0.137392	3	0.171471	0.0295142	0.161722
3707	Q921G6;H3BIX9;H3BLL3	313;259;313	S	Q921G6	S313	Leucine-rich repeat and calponin homology domain-containing protein 4	Lrch4	LDSGFHSVDSGSKRWSGNESTDDFSELSFRI	RWS(1)GNESTDDFSELSFR	RWS(49.35)GNES(-49.35)T(-60.25)DDFS(-89.61)ELS(-99.39)FR	3	6.90813e-05	108.96	3	704.96	0.39152	+	0.427746	0.383259	0.429317	3	0.41344	0.02615	0.0433354	0.163644	0.178113	0.151663	3	0.164474	0.0132446	0.161722
1868	Q80YV3;F7CGG2;E9PZA7;E9QLK7;E9PWT1	773;1795;2055;2055;2073	S	Q80YV3	S773	Transformation/transcription domain-associated protein	Trrap	RFRAATGAISAVFGRSQSLPGADSLLAKPID	S(0.925)QS(0.075)LPGADSLLAKPIDK	S(10.9)QS(-10.9)LPGADS(-58.17)LLAKPIDK	1	4.90064e-06	130.38	4	455.735	-0.096537	+	0.325516	0.238473		2	0.281994	0.0615487	0.102417	0.107304	0.215267		2	0.161286	0.0763413	0.161722
11441	S4R2T8;Q811D0;Q811D0-2;Q811D0-3;H7BWY4;E9Q9H0	102;102;102;102;102;102	S	S4R2T8	S102	Disks large homolog 1	Dlg1	LPSTAVTSETLPGSLSPPVEKYRYQDEEVLP	QCEPVQPVTTWEIASLPS(0.005)T(0.005)AVT(0.005)S(0.005)ET(0.004)LPGS(0.055)LS(0.922)PPVEK	QCEPVQPVT(-64.78)T(-62.41)WEIAS(-46.65)LPS(-22.91)T(-22.91)AVT(-22.92)S(-22.92)ET(-23.94)LPGS(-12.24)LS(12.24)PPVEK	31	9.09908e-75	107.34	3	1305.97	0.51645	+	0.2647	0.267805	0.290976	3	0.274494	0.0143584	0.114941	0.147361	0.151737	0.175777	3	0.158292	0.0152995	0.161722
6639	Q60591;Q60591-2	757;757	S	Q60591	S757	Nuclear factor of activated T-cells, cytoplasmic 2	Nfatc2	ARYQQQSPAAALYQRSKSLSPGLLGYQQPSL	S(0.871)KS(0.382)LS(0.747)PGLLGYQQPSLLAAPLGLADAHR	S(6.8)KS(-3.87)LS(3.87)PGLLGY(-35.85)QQPS(-51.41)LLAAPLGLADAHR	1	5.65283e-06	91.733	4	755.881	0.12747	+	0.108227	0.252707	0.320018	3	0.226984	0.108214	0.182061	0.119867	0.148911	0.212157	3	0.160312	0.0471895	0.161722
6774	Q61165	730	S	Q61165	S730	Sodium/hydrogen exchanger 1	Slc9a1	KADLPVITIDPASPQSPESVDLVNEELKGKV	ADLPVITIDPASPQS(0.921)PES(0.078)VDLVNEELK	ADLPVIT(-45.04)IDPAS(-32.95)PQS(10.71)PES(-10.71)VDLVNEELK	15	7.39234e-09	86.946	3	986.153	0.49704	+	0.226651		0.178552	2	0.202602	0.0340115	0.220135	0.12421		0.23111	2	0.17766	0.0755902	0.161722
6738	Q61074	524	S	Q61074	S524	Protein phosphatase 1G	Ppm1g	ELQAESGKRKLEEALSTEGAEDTGNSDKKKA	KLEEALS(0.96)T(0.04)EGAEDTGNSDK	KLEEALS(13.81)T(-13.81)EGAEDT(-94.95)GNS(-103.4)DK	7	3.51947e-31	156.2	3	691.967	0.8301	+		0.141889	-0.109309	2	0.01629	0.177623	0.920591		0.252707	0.140646	2	0.196676	0.0792397	0.161722
14209	Q9DB52	146	T	Q9DB52	T146	Protein FAM122A	Fam122a	PKRIDFIPVSPAPSPTRGIGKQCFSPSLQSF	RIDFIPVS(1)PAPS(0.024)PT(0.976)RGIGK	RIDFIPVS(36)PAPS(-16.17)PT(16.17)RGIGK	14	0.000158286	134	3	723.36	-2.6728	+	0.398253	0.480409	0.482171	3	0.453611	0.0479499	0.0327627	0.128094	0.159657	0.187829	3	0.158527	0.0298833	0.162778
4495	P14901	242	S	P14901	S242	Heme oxygenase 1	Hmox1	DQSPSQMASLRQRPASLVQDTAPAETPRGKP	QRPAS(1)LVQDTAPAETPR	QRPAS(88.72)LVQDT(-88.72)APAET(-131.46)PR	5	5.02775e-06	138.28	3	639.646	-0.075193	+	0.344097	0.385892	0.254137	3	0.328042	0.0673289	0.0876568	0.102093	0.241895	0.18919	3	0.177726	0.0706027	0.162778
9399	Q8R0G9	37	S	Q8R0G9	S37	Nuclear pore complex protein Nup133	Nup133	GIGPTSTPRASRRGLSLGSAVNSPVLFSPAG	RGLS(1)LGSAVNSPVLFSPAGR	RGLS(45.53)LGS(-45.53)AVNS(-73.62)PVLFS(-134.13)PAGR	4	3.87552e-124	214.81	2	1033.03	-1.3325	+	0.569994	0.56685	0.523052	3	0.553299	0.0262411	0.0194522	0.116185	0.18574	0.185659	3	0.162528	0.0401342	0.16332
9565	Q8VBT9;Q8VBT9-3;Q8VBT9-2;A2AC05	281;204;204;204	S	Q8VBT9	S281	Tether containing UBX domain for GLUT4	Aspscr1	RLGGPSASLRPLTSPSANSSKSFSGPGGPSK	LGGPSASLRPLT(0.001)S(0.01)PS(0.955)ANS(0.011)S(0.022)K	LGGPS(-103.53)AS(-71.59)LRPLT(-32.52)S(-19.7)PS(16.31)ANS(-19.23)S(-16.31)K	15	1.48727e-69	196.95	2	1004	-1.4266	+	0.343074	0.699274	0.721612	3	0.587987	0.212395	0.0229732	0.183103	0.179839	0.140784	3	0.167908	0.0235474	0.16332
11729	Q8K400;D3Z079;Q8K400-2;D3Z2Q2	1040;1004;286;987	T	Q8K400	T1040	Syntaxin-binding protein 5	Stxbp5	ENLQEMLGELFTPVETPEAPNRGFFKGLFGG	LTYSQETCENLQEMLGELFT(0.052)PVET(0.948)PEAPNRGFFK	LT(-78.86)Y(-78.15)S(-78.15)QET(-73.25)CENLQEMLGELFT(-12.57)PVET(12.57)PEAPNRGFFK	24	4.76867e-11	84.683	4	1014.72	0.38126	+	0.515503	0.456184	0.386761	3	0.452816	0.0644371	0.0367501	0.145251	0.136499	0.187755	3	0.156502	0.027418	0.16332
5513	P99027	79	S	P99027	S79	60S acidic ribosomal protein P2	Rplp2	SVPAGGAVAVSAAPGSAAPAAGSAPAAAEEK	LASVPAGGAVAVSAAPGS(1)AAPAAGSAPAAAEEK	LAS(-98.54)VPAGGAVAVS(-55.16)AAPGS(55.16)AAPAAGS(-61.98)APAAAEEK	18	5.31449e-88	164.57	3	952.138	-1.3922	+	0.274089	0.345158	0.245461	3	0.288236	0.0513323	0.11065	0.122134	0.124472	0.235929	3	0.160845	0.0650351	0.16332
7834	Q7TSG3	157	S	Q7TSG3	S157	F-box only protein 5	Fbxo5	ENFRNSPQARLLPSQSPDQHPNKTLLPVLHF	LLPS(0.179)QS(0.821)PDQHPNK	LLPS(-6.6)QS(6.6)PDQHPNK	6	1.05521e-13	145.69	2	770.861	1.9111	+	0.40968	0.323768	0.10539	3	0.279613	0.156876	0.173305	0.386053	0.132964	0.133595	3	0.217537	0.145939	0.16332
8280	Q8BHL3	693	S	Q8BHL3	S693	TBC1 domain family member 10B	Tbc1d10b	PGAVVIAEGLHPSLPSPTGNSTPLGTSKEIR	ASAGPVPGAVVIAEGLHPSLPS(0.884)PT(0.049)GNS(0.046)T(0.015)PLGT(0.004)S(0.001)K	AS(-133.3)AGPVPGAVVIAEGLHPS(-37.38)LPS(12.53)PT(-12.53)GNS(-12.82)T(-17.66)PLGT(-23.97)S(-28.69)K	22	4.17937e-75	146.45	3	1082.89	1.1296	+	0.703154		0.549505	2	0.626329	0.108646	0.0136328	0.103193		0.29435	2	0.198771	0.135169	0.16349
8206	Q8BGG7;Q8BGG7-2	366;244	S	Q8BGG7	S366	Ubiquitin-associated and SH3 domain-containing protein B	Ubash3b	PLTIICQPMQPLRVNSQPGPQKRCLFVCRHG	QYEDQGLGETT(0.001)PLT(0.001)IICQPMQPLRVNS(0.998)QPGPQK	QY(-47.24)EDQGLGET(-38.57)T(-30.65)PLT(-30.65)IICQPMQPLRVNS(30.65)QPGPQK	27	1.7953e-05	74.516	4	951.709	0.92977	+		0.299202	0.583826	2	0.441514	0.201259	0.0451617		0.109747	0.218058	2	0.163903	0.0765873	0.16349
9661	Q8VEG0	422	S	Q8VEG0	S422	Coiled-coil domain-containing protein 71	Ccdc71	DEVRQCAQQILRVNLSPVVWLQPLLPF____	VNLS(1)PVVWLQPLLPF	VNLS(79.87)PVVWLQPLLPF	4	0.000261391	102.47	2	901.486	0.13323	+	0.387461	0.393786	0.343998	3	0.375081	0.0271045	0.0580674	0.163955	0.194847	0.141312	3	0.166705	0.0268731	0.16349
1106	B9EJ86;G3X9N6	63;21	S	B9EJ86	S63	Oxysterol-binding protein	Osbpl8	GRDANPTPTRDLPQPSLSPASLHSQGFERGK	DLPQPS(0.921)LS(0.079)PASLHSQGFER	DLPQPS(10.66)LS(-10.66)PAS(-34.32)LHS(-48.2)QGFER	6	7.07315e-05	85.884	3	716.004	-2.3843	+	0.265455	0.245488		2	0.255471	0.0141185	0.116226	0.146801	0.131843		2	0.139322	0.0105767	0.16349
10668	Q9DCC5;P23198;D3Z313	102;102;102	S	Q9DCC5	S102	Chromobox protein homolog 3	Cbx3	DGTKRKSLSDSESDDSKSKKKRDAADKPRGF	RKSLSDSES(0.013)DDS(0.987)K	RKS(-58.24)LS(-62.31)DS(-53.87)ES(-18.8)DDS(18.8)K	12	1.82533e-18	182.7	2	767.325	0.2539	+	0.0274312		0.425795	2	0.226613	0.281686	0.392275	0.434199		0.133069	2	0.283634	0.212931	0.16349
2895	Q9QXS1-3;E9QMZ5;Q9QXS1-6;E9Q3W4;Q9QXS1-15;Q9QXS1-10;E9Q153;Q9QXS1-9;Q9QXS1-12;E9QKX4;Q9QXS1-11;Q9QXS1-13;E9QLJ5;Q9QXS1-5;E9PY96;Q9QXS1-16;Q9QXS1-4;E9QL05;Q9QXS1-14;E9QQ00;Q9QXS1-7;Q9QXS1-8;E9QK43;Q9QXS1;Q9QXS1-2;E9QPE8;E9QN87	1581;1581;1610;1424;1487;1549;1549;1554;1559;1559;1564;1572;1572;1581;1581;1582;1586;1586;1588;1588;1615;1627;1627;1729;1724;1724;1729	S	Q9QXS1-3;Q9QXS1	S1581	Plectin	Plec	TAQRSAEVELQSKRASFAEKTAQLERTLQEE	RAS(1)FAEK	RAS(40.72)FAEK	3	0.00835941	86.882	3	296.804	0.22462	+	0.0595634	0.0971879	0.0764969	3	0.0777494	0.0188435	0.645868	0.194282	0.142734	0.154313	3	0.163776	0.0270456	0.16349
7870	Q7TT18	108	S	Q7TT18	S108	Activating transcription factor 7-interacting protein 1	Atf7ip	CMPNVAVKNKQEDLNSEALSPSITCDLSSRV	NKQEDLNS(0.755)EALS(0.235)PS(0.005)IT(0.003)CDLS(0.001)S(0.001)R	NKQEDLNS(5.06)EALS(-5.06)PS(-21.97)IT(-24.23)CDLS(-28.94)S(-28.94)R	8	0.00268409	69.79	2	1272.57	-0.18208	+	0.0693721	-0.0309757		2	0.0191982	0.0709566	0.984474	0.160484	0.117404		2	0.138944	0.0304624	0.16349
8497	Q8BSN5;Q8BSN5-3;Q8BSN5-2	398;268;331	S	Q8BSN5	S398	PHD finger protein 23	Phf23	KELRPEARRLGGLPKSGEP____________	LGGLPKS(1)GEP	LGGLPKS(71.93)GEP	7	0.00865874	90.793	2	517.75	0.74148	+	0.876385	0.849653	0.756193	3	0.82741	0.0631076	0.00385028	0.15114	0.163668	0.162532	3	0.159113	0.0069284	0.163831
13245	Q61686;D3Z0U2	8;8	T	Q61686	T8	Chromobox protein homolog 5	Cbx5	________MGKKTKRTADSSSSEDEEEYVVE	T(0.932)ADS(0.019)S(0.014)S(0.018)S(0.018)EDEEEYVVEK	T(16.97)ADS(-16.97)S(-18.11)S(-17.23)S(-17.23)EDEEEY(-49.52)VVEK	1	1.64217e-06	115.91	3	661.925	2.2424	+	-0.10681	0.894166		2	0.393678	0.707797	0.935614	0.0891196	0.771617		2	0.430368	0.482598	0.163831
2813	E9QLH9	131	S	E9QLH9	S131		D8Ertd82e	PIVYLGSFRGLQKPASPLACTDGNSRCPPAY	GLQKPAS(1)PLACTDGNSR	GLQKPAS(48.09)PLACT(-48.09)DGNS(-59.27)R	7	0.00389523	80.016	3	617.952	-2.4365	+	0.431444	0.332418	0.685838	3	0.483233	0.182313	0.0343473	0.254051	0.063971	0.278173	3	0.198732	0.117328	0.164074
4150	O54834;O54834-4;O54834-3;A2ALX6;A2ALX7;G3UZI7;O54834-2	265;73;83;83;83;83;265	S	O54834	S265	Rho GTPase-activating protein 6	Arhgap6	KDGQKRKKSLRKKLDSLGKEKNKDKEFIPQA	KLDS(1)LGK	KLDS(67.21)LGK	4	0.0060602	91.265	3	280.812	-0.14165	+	0.253168	0.260477	0.290306	3	0.267984	0.0196741	0.119898	0.131585	0.156064	0.180061	3	0.155904	0.0242387	0.164074
6552	Q5SWU9;Q5SWU9-2	49;87	S	Q5SWU9	S49	Acetyl-CoA carboxylase 1;Biotin carboxylase	Acaca	SNLVKLDLEEKEGSLSPASVSSDTLSDLGIS	EGS(0.054)LS(0.937)PAS(0.009)VSSDTLSDLGISGLQDGLAFHMR	EGS(-12.38)LS(12.38)PAS(-20.2)VS(-48.81)S(-48.34)DT(-58.16)LS(-66.66)DLGIS(-91.9)GLQDGLAFHMR	5	2.63381e-46	116.16	3	1076.5	-0.64243	+	0.188	0.151799		2	0.169899	0.0255981	0.231637	0.175191	0.111195		2	0.143193	0.0452518	0.164074
4028	O08750	285	S	O08750	S285	Nuclear factor interleukin-3-regulated protein	Nfil3	NSPRTSEADEGVVGKSSDGEDEQQVPKGPIH	TSEADEGVVGKS(0.859)S(0.141)DGEDEQQVPK	T(-55.89)S(-55.89)EADEGVVGKS(7.83)S(-7.83)DGEDEQQVPK	12	1.30668e-05	96.391	3	824.353	0.12888	+	-0.0928575		0.381283	2	0.144213	0.335268	0.990023	0.21376		0.157023	2	0.185391	0.0401192	0.165336
9781	Q91WQ5	230	S	Q91WQ5	S230	TAF5-like RNA polymerase II p300/CBP-associated factor-associated factor 65 kDa subunit 5L	Taf5l	SSRTENSSLEPPEVPSPILQNEAALEVLQES	TENSSLEPPEVPS(0.999)PILQNEAALEVLQESIK	T(-35.19)ENS(-37.54)S(-34.66)LEPPEVPS(34.66)PILQNEAALEVLQES(-39.66)IK	13	5.38676e-05	57.097	3	1114.55	1.509	+	0.121396		0.0640999	2	0.0927478	0.0405142	0.590066	0.116736		0.236804	2	0.17677	0.0849009	0.165963
3096	Q8BRN9;F6XC25	502;424	S	Q8BRN9	S502	Coiled-coil and C2 domain-containing protein 1B	Cc2d1b	PAQAPLAKKPAQTLVSPSHLLTEPKASSSKE	KPAQT(0.007)LVS(0.986)PS(0.007)HLLTEPK	KPAQT(-21.73)LVS(21.24)PS(-21.24)HLLT(-60.33)EPK	8	0.000324399	85.177	3	642.675	0.69607	+	0.160258	0.165333	0.201239	3	0.17561	0.0223397	0.251628	0.134079	0.124928	0.203141	3	0.154049	0.0427603	0.166501
11253	Q9Z1T5	439	S	Q9Z1T5	S439	Deformed epidermal autoregulatory factor 1 homolog	Deaf1	LPALAVPPSTPTKAVSPTVVSGLEMSEHRSW	AVS(0.991)PT(0.009)VVSGLEMSEHR	AVS(20.51)PT(-20.51)VVS(-39.31)GLEMS(-65.49)EHR	3	3.86839e-05	115.26	3	593.61	0.36941	+	0.391147	0.275841	0.468164	3	0.378384	0.0967945	0.0589396	0.102049	0.133954	0.261188	3	0.16573	0.0841939	0.168045
13507	Q80VI1	413	T	Q80VI1	T413	E3 ubiquitin-protein ligase TRIM56	Trim56	DDRTKIGKQGGAQPLTPKEGKDQNPQEDDGV	QGGAQPLT(1)PKEGKDQNPQEDDGVFIER	QGGAQPLT(58.36)PKEGKDQNPQEDDGVFIER	8	0.000617117	82.216	4	759.104	1.2394	+	0.503273	0.527088	0.484683	3	0.505015	0.0212564	0.0245729	0.18093	0.188478	0.133506	3	0.167638	0.0297994	0.168653
7620	Q6VN19	369	S	Q6VN19	S369	Ran-binding protein 10	Ranbp10	RSPKSQDSYPGSPSLSPRHGPSSSHIHNTGA	SQDSYPGSPS(0.002)LS(0.998)PR	S(-181.22)QDS(-108.56)Y(-200.44)PGS(-84.11)PS(-26.05)LS(26.05)PR	12	1.15424e-295	266.39	2	779.333	-2.2558	+		0.376814	0.414077	2	0.395446	0.0263489	0.051121		0.132324	0.180535	2	0.156429	0.0340905	0.168653
9145	Q8CJ27;B1ARM8	373;373	S	Q8CJ27	S373	Abnormal spindle-like microcephaly-associated protein homolog	Aspm	GLKKGLNFKSVNPVLSPTQFVKDSMGHVGQQ	SVNPVLS(0.999)PT(0.001)QFVK	S(-89.77)VNPVLS(32.86)PT(-32.86)QFVK	7	3.79083e-113	213.36	3	499.257	0.32626	+	0.247335	0.28051	0.328818	3	0.285554	0.040975	0.106077	0.155163	0.152686	0.160126	3	0.155992	0.00378884	0.168653
1852	Q8CCB4;E9PWD1;E9PYD3;E9PXG9	377;100;329;348	S	Q8CCB4	S377	Vacuolar protein sorting-associated protein 53 homolog	Vps53	FSGCTLTDGTLKKLESPPPSTNPFLEDETTP	KLES(0.97)PPPS(0.022)T(0.009)NPFLEDETTPEMEELALEK	KLES(16.46)PPPS(-16.46)T(-20.56)NPFLEDET(-68.74)T(-72.42)PEMEELALEK	4	1.19902e-24	96.045	3	1084.5	0.34435	+		0.165571	0.0816865	2	0.123629	0.0593151	0.486323		0.110186	0.208569	2	0.159377	0.0695676	0.168653
8166	Q8BG15;Q8BG15-5;Q8BG15-3;Q8BG15-6;Q8BG15-2;Q8BG15-4	9;9;9;9;9;9	S	Q8BG15	S9	CTD small phosphatase-like protein 2	Ctdspl2	_______MKLRTRKASQQSSPIQTQRTARAK	KAS(0.995)QQS(0.004)S(0.002)PIQTQR	KAS(24.29)QQS(-24.29)S(-27.81)PIQT(-49.51)QR	3	0.0113803	65.905	3	513.582	0.97235	+	0.270446	0.26998	0.360454	3	0.300293	0.0521012	0.0959144	0.170773	0.141105	0.159286	3	0.157055	0.0149597	0.169195
8436	Q8BPI1-2;Q8BPI1	643;681	S	Q8BPI1-2	S643	Protein kintoun	Dnaaf2	GCPLSEAEAADQSATSPAASDSAAAVEALKI	EGCPLSEAEAADQSAT(0.017)S(0.925)PAAS(0.029)DS(0.029)AAAVEALK	EGCPLS(-50.14)EAEAADQS(-33.28)AT(-17.4)S(15.04)PAAS(-15.04)DS(-15.04)AAAVEALK	17	7.40873e-50	134.45	3	1028.78	0.93728	+	0.362105	0.279051	0.416654	3	0.352603	0.069292	0.0677684	0.138346	0.134241	0.18506	3	0.152549	0.0282302	0.169464
14646	sp|P21860|ERBB3_HUMAN	1159	Y	sp|P21860|ERBB3_HUMAN	Y1159			TPLSPPGLEEEDVNGYVMPDTHLKGTPSSRE	HSLLTPVTPLSPPGLEEEDVNGY(0.981)VMPDT(0.019)HLK	HS(-83.8)LLT(-80.23)PVT(-70.96)PLS(-50.01)PPGLEEEDVNGY(17.15)VMPDT(-17.15)HLK	23	4.48617e-33	89.803	4	867.172	-0.85238	+	0.508974	0.400503	0.616616	3	0.508698	0.108056	0.0251757	0.483941	0.0421816	0.612486	3	0.379536	0.299144	0.170821
13418	Q6Q783	430	T	Q6Q783	T430	Histone-lysine N-methyltransferase SUV420H2	Suv420h2	LPAAPAPAGNPGPVPTPDFIPKQALAFAPFC	LAPALPAAPAPAGNPGPVPT(1)PDFIPK	LAPALPAAPAPAGNPGPVPT(105.94)PDFIPK	20	1.97394e-49	141.78	3	852.78	-0.69243	+	0.430236	0.453165	0.449821	3	0.444407	0.012386	0.0349179	0.138418	0.122183	0.194989	3	0.151863	0.0382198	0.170821
7718	Q78WZ7	318	S	Q78WZ7	S318	DNA-directed RNA polymerase I subunit RPA43	Twistnb	GYQSDHNKKKKKRKHSEEANFESPKKRQ___	KHS(1)EEANFESPK	KHS(96.74)EEANFES(-96.74)PK	3	8.89428e-05	121.45	3	494.88	-1.8393	+		0.54759	0.308017	2	0.427804	0.169404	0.0608164		0.225981	0.13831	2	0.182146	0.0619925	0.170821
922	Q4JIM5;B2RQ57;F8VQH0	936;832;936	S	Q4JIM5	S936	Abelson tyrosine-protein kinase 2	Abl2	AVLPTTHNHKVPVLISPTLKHTPADVQLIGT	VPVLIS(0.988)PT(0.012)LK	VPVLIS(19.02)PT(-19.02)LK	6	4.57165e-07	147.33	3	382.889	-1.5127	+	0.477599	0.506058	0.516413	3	0.500023	0.0200985	0.0245729	0.0833355	0.168026	0.265264	3	0.172209	0.0910364	0.17118
1755	Q6NZJ6;E9PVC6;E9Q9E1;E9PVC5;Q6NZJ6-2	1187;1140;1180;1181;1173	S	Q6NZJ6	S1187	Eukaryotic translation initiation factor 4 gamma 1	Eif4g1	RGDRLDRARTPATKRSFSKEVEERSRERPSQ	TPAT(0.002)KRS(0.998)FS(0.001)K	T(-66.22)PAT(-27.97)KRS(27.97)FS(-31.21)K	7	0.000223286	137.95	2	601.8	-0.92265	+	0.10459	0.152747	0.276684	3	0.178007	0.0887844	0.266897	0.204169	0.0826777	0.214827	3	0.167224	0.0734133	0.17118
8396	Q8BLR5	442	S	Q8BLR5	S442	PH and SEC7 domain-containing protein 4	Psd4	SPVSSQDSSPRVLLHSPKWPQDASHLLQKDR	VLLHS(1)PKWPQDASHLLQK	VLLHS(52.02)PKWPQDAS(-52.02)HLLQK	5	0.00576939	66.289	4	545.037	0.54794	+	0.658774	0.696994		2	0.677884	0.0270253	0.0087336	0.125976	0.145165		2	0.135571	0.0135685	0.171268
13834	Q8K2Z4;Q8K2Z4-2	1319;1319	T	Q8K2Z4	T1319	Condensin complex subunit 1	Ncapd2	LSAKKPSAVSRLQPLTSVDSDNDFVTPKPRR	LQPLT(0.848)S(0.29)VDS(0.862)DNDFVTPKPR	LQPLT(6.69)S(-6.69)VDS(7.1)DNDFVT(-60.43)PKPR	5	4.86839e-49	170.5	3	763.678	0.076235	+	0.676931	0.488889	0.886057	3	0.683959	0.198677	0.0119814	0.105446	0.183555	0.188921	3	0.159307	0.0467224	0.171355
10521	Q9D7A8	260	S	Q9D7A8	S260	Armadillo repeat-containing protein 1	Armc1	ESPTKEQDKAVSRVGSHPEGGASWLSTAANF	VGS(0.999)HPEGGAS(0.001)WLSTAANFLSR	VGS(28.41)HPEGGAS(-28.41)WLS(-56.89)T(-60.27)AANFLS(-68.44)R	3	0.00058678	70.02	3	742.011	2.0907	+		0.442511	0.410978	2	0.426745	0.0222973	0.0433354		0.159988	0.159047	2	0.159518	0.000665084	0.171355
2113	E9Q1K3;F8WHZ9;D3Z0T1;Q9QYC0-2;F8WGR0;Q9QYC0	12;12;12;12;12;12	S	E9Q1K3;Q9QYC0-2;Q9QYC0	S12	Alpha-adducin	Add1	____MNGDTRAAVVTSPPPTTAPHKERYFDR	AAVVT(0.001)S(0.996)PPPT(0.002)TAPHK	AAVVT(-28.27)S(27.11)PPPT(-27.11)T(-34.78)APHK	6	3.8071e-44	173.77	2	777.39	1.3882	+	0.294334	0.333608	0.338765	3	0.322236	0.0243008	0.0812981	0.120893	0.16343	0.178225	3	0.154182	0.0297636	0.171355
7766	Q7TNF9;Q7TNF9-2	354;354	S	Q7TNF9	S354	Protein FAM117A	Fam117a	PPEGCERVRVFEEATSPGPDLAFLTSCPDKN	VRVFEEAT(0.208)S(0.792)PGPDLAFLTSCPDK	VRVFEEAT(-5.8)S(5.8)PGPDLAFLT(-49.02)S(-52.75)CPDK	9	2.59051e-05	93.388	3	872.74	-2.4551	+	0.25691	0.246892	0.40759	3	0.303797	0.0900265	0.0987607	0.271508	0.064046	0.238388	3	0.191314	0.111455	0.171355
6011	Q5DTW2;Q3UH07;Q5DTW2-2;Q3UH63	497;497;497;497	S	Q5DTW2	S497	Scm-like with four MBT domains protein 2	Sfmbt2	SKRKTVHFKMEKQLLSPVPIEKIPHELCLLP	QLLS(1)PVPIEK	QLLS(128.85)PVPIEK	4	1.99838e-07	147.39	2	602.323	1.6414	+	0.254185	0.254427	0.317332	3	0.275315	0.0363878	0.114766	0.183752	0.131458	0.158347	3	0.157852	0.0261504	0.171355
1820	E9PVX6	337	S	E9PVX6	S337		Mki67	QQLKDEDSRVTGRRHSVNLDEGESAQAVHKT	RHS(1)VNLDEGESAQAVHK	RHS(59.89)VNLDEGES(-59.89)AQAVHK	3	1.6735e-06	131.86	3	652.969	-0.2041	+	0.240075	0.317771	0.360832	3	0.306226	0.061201	0.093102	0.139452	0.144917	0.171314	3	0.151894	0.0170386	0.171812
4928	P48754	502	S	P48754	S502	Breast cancer type 1 susceptibility protein homolog	Brca1	ITQEQPFTNKLKRKRSTSLQPEDFIKKADSA	S(0.964)T(0.035)S(0.001)LQPEDFIK	S(14.42)T(-14.42)S(-30.3)LQPEDFIK	1	3.31167e-16	162.37	2	672.808	-0.28444	+	0.469925	0.324941	0.7603	3	0.518389	0.221689	0.0317447	0.15028	0.0721396	0.354411	3	0.192277	0.145747	0.173093
10756	Q9ERG2	334	S	Q9ERG2	S334	Striatin-3	Strn3	ARSSGDGTEWDKDDLSPTAEVWDVDQGLISK	SSGDGTEWDKDDLS(0.966)PT(0.034)AEVWDVDQGLISK	S(-54.71)S(-54.71)GDGT(-46.14)EWDKDDLS(14.56)PT(-14.56)AEVWDVDQGLIS(-76.49)K	14	2.10753e-12	97.771	3	1077.47	0.36155	+		0.375792	0.222428	2	0.29911	0.108444	0.118384		0.112069	0.199125	2	0.155597	0.0615582	0.173093
6986	Q62311;D3Z0T0	532;532	S	Q62311	S532	Transcription initiation factor TFIID subunit 6	Taf6	VQTLVSARAAAPPQPSPPPTKFIVMSSSSSA	AAAPPQPS(1)PPPTK	AAAPPQPS(36.41)PPPT(-36.41)K	8	1.5002e-08	137.81	2	669.826	-0.25743	+	0.484528	0.603761	0.490569	3	0.526286	0.0671636	0.0231841	0.120537	0.153327	0.182666	3	0.152177	0.0310804	0.174652
10788	Q9ERU9	1438	S	Q9ERU9	S1438	E3 SUMO-protein ligase RanBP2;Putative peptidyl-prolyl cis-trans isomerase	Ranbp2	NEPTVSRCIACQNTKSASSFVQTSFKFGQGD	S(0.999)AS(0.001)SFVQTSFK	S(32.39)AS(-32.39)S(-74.75)FVQT(-134.66)S(-141.33)FK	1	7.92501e-16	156.2	2	634.782	0.13464	+	0.533709		0.78115	2	0.657429	0.174967	0.0122671	0.0975511		0.286585	2	0.192068	0.133667	0.174747
10672	Q9DCD5	214	S	Q9DCD5	S214	Tight junction-associated protein 1	Tjap1	GQEVASPSPSPSSSLSPGAVVPTSVIARVLE	SGQEVASPS(0.003)PS(0.003)PS(0.01)S(0.061)S(0.019)LS(0.903)PGAVVPTSVIAR	S(-55.59)GQEVAS(-34.78)PS(-24.21)PS(-24.21)PS(-19.7)S(-11.73)S(-16.76)LS(11.73)PGAVVPT(-33.82)S(-33.82)VIAR	17	6.11533e-32	123.21	3	944.466	0.56136	+	0.214155	0.296182	0.376172	3	0.295503	0.0810108	0.100772	0.0621262	0.271586	0.29289	3	0.208867	0.127527	0.174747
8862	Q8C3J5	1683	S	Q8C3J5	S1683	Dedicator of cytokinesis protein 2	Dock2	ESAPPKTPKVEEEPISPGSTLPEVKLRRSKK	TPKVEEEPIS(1)PGSTLPEVK	T(-136.92)PKVEEEPIS(56.04)PGS(-56.04)T(-60.81)LPEVK	10	1.4558e-157	222.93	3	706.352	0.56972	+	0.400503	0.396164	0.425818	3	0.407495	0.0160157	0.0443681	0.123788	0.116242	0.218115	3	0.152715	0.0567637	0.1753
1103	P54279;B9EJ22	477;477	S	P54279	S477	Mismatch repair endonuclease PMS2	Pms2	VISYRGLRGSQDKLVSPTDSPGDCMDREKIE	LVS(0.985)PT(0.013)DS(0.001)PGDCMDREK	LVS(18.64)PT(-18.64)DS(-28.86)PGDCMDREK	3	8.91021e-05	111.63	3	629.594	2.4737	+	0.346412	0.355068	0.289172	3	0.330217	0.0358088	0.0814472	0.114667	0.116242	0.234175	3	0.155028	0.0685477	0.176593
1115	B9EKS2;Q6ZPY7;Q6ZPY7-2	1252;1052;1052	S	B9EKS2	S1252	Lysine-specific demethylase 3B	Kdm3b	ETKDAGSLRSVLNKESHSPFGLDSFNSTAKV	ES(0.931)HS(0.069)PFGLDSFNSTAK	ES(11.31)HS(-11.31)PFGLDS(-64.29)FNS(-88.23)T(-91.04)AK	2	0.00016981	98.676	3	601.924	0.16861	+	0.0597527		0.158046	2	0.1089	0.0695042	0.512778	0.137344		0.190198	2	0.163771	0.0373734	0.176593
8756	Q8C0T5;Q8C0T5-2	1712;1712	S	Q8C0T5	S1712	Signal-induced proliferation-associated 1-like protein 1	Sipa1l1	EQALVQMKSYSSKDPSPTLASKVDQLEGMLK	S(0.01)Y(0.009)S(0.011)S(0.003)KDPS(0.957)PT(0.011)LASKVDQLEGMLK	S(-19.97)Y(-20.49)S(-19.44)S(-25.23)KDPS(19.44)PT(-19.44)LAS(-40.95)KVDQLEGMLK	8	0.000767313	89.08	4	641.061	-0.21444	+	0.185684	0.296182	0.313176	3	0.265014	0.0692255	0.124296	0.101423	0.190051	0.185	3	0.158825	0.0497757	0.177056
7134	Q68EF0	214	S	Q68EF0	S214	Rab-3A-interacting protein	Rab3ip	VLQAEVAALKTLVLSSSPTSPTQEPLAAAKT	TLVLSS(0.912)S(0.087)PT(0.001)SPTQEPLAAAK	T(-51.61)LVLS(-40.24)S(10.21)S(-10.21)PT(-30.67)S(-47.26)PT(-54.45)QEPLAAAK	6	3.40522e-42	160.57	2	1039.52	0.61412	+	0.0819591	0.238172		2	0.160065	0.110459	0.289558	0.123315	0.143889		2	0.133602	0.0145481	0.177152
423	Q91VX2;A2AMY5	254;253	S	Q91VX2	S254	Ubiquitin-associated protein 2	Ubap2	PPSKSSYGLKGAWKNSVEEWTTEDWTEDLSE	GAWKNS(1)VEEWTTEDWTEDLSETK	GAWKNS(58.76)VEEWT(-58.76)T(-64.02)EDWT(-86.83)EDLS(-105.55)ET(-112.87)K	6	6.27802e-17	118.44	3	941.067	1.012	+	0.446755	0.0566762	0.535689	3	0.346373	0.254795	0.16932	0.147551	0.096319	0.220721	3	0.154864	0.0625226	0.177616
3097	Q8BRN9;F6XC25	504;426	S	Q8BRN9	S504	Coiled-coil and C2 domain-containing protein 1B	Cc2d1b	QAPLAKKPAQTLVSPSHLLTEPKASSSKESL	KPAQTLVS(0.164)PS(0.836)HLLTEPK	KPAQT(-35.61)LVS(-7.09)PS(7.09)HLLT(-42.21)EPK	10	7.03889e-05	104.68	3	642.675	0.25661	+	0.115377		0.217707	2	0.166542	0.0723576	0.287221	0.129374		0.197445	2	0.163409	0.0481338	0.177897
13277	Q640M1	182	T	Q640M1	T182	U3 small nucleolar RNA-associated protein 14 homolog A	Utp14a	SFAPMEHVFREWKARTPLEQEVFNLLHKNKQ	ART(1)PLEQEVFNLLHK	ART(95.87)PLEQEVFNLLHK	3	1.27995e-26	169.06	3	625.656	-0.46549	+	0.67911	0.654879	0.69579	3	0.676593	0.0205712	0.00906146	0.105064	0.133954	0.224484	3	0.154501	0.0623051	0.177994
12074	Q6EJB6;E9Q9S3	204;228	T	Q6EJB6	T204	U3 small nucleolar RNA-associated protein 14 homolog B	Utp14b	NLLHKNKQPVTDPLLTPVETASIRAMSLEEA	NKQPVTDPLLT(0.993)PVET(0.004)AS(0.003)IR	NKQPVT(-88.86)DPLLT(23.82)PVET(-23.82)AS(-25.49)IR	11	8.6796e-06	120.33	3	720.375	-0.68491	+	0.512364	0.474799	0.50611	3	0.497758	0.0201273	0.0251757	0.108217	0.214817	0.164976	3	0.16267	0.0533374	0.180787
8893	Q8C6B2;Q8C6B2-2	520;507	S	Q8C6B2	S520	Rhotekin	Rtkn	PTWMQPLPWGRPRTFSLDAAPADHSLGPSRS	T(0.129)FS(0.871)LDAAPADHSLGPSR	T(-8.29)FS(8.29)LDAAPADHS(-80.74)LGPS(-86.95)R	3	0.000132285	108.12	3	607.944	-0.52807	+	0.3912	0.424539	0.547723	3	0.454487	0.0824472	0.0327627	0.16488	0.144948	0.1481	3	0.152643	0.0107148	0.180787
1664	Q80Z60-2;F7DDS0;Q80Z60-3;Q80Z60;E9QKA6;E9PUE3	9;9;9;9;9;9	S	Q80Z60-2	S9	Endothelin-converting enzyme 2;Methyltransferase-like region;Endothelin-converting enzyme 2 region	Ece2	_______MASPRTPVSPPELPEKNFQYRQVQ	TPVS(1)PPELPEK	T(-67.86)PVS(67.86)PPELPEK	4	0.000261131	118.52	2	637.307	1.4153	+	0.4019	0.428135	0.293538	3	0.374524	0.0713521	0.0651997	0.109573	0.187098	0.170124	3	0.155598	0.0407522	0.180787
4641	P26041	56	S	P26041	S56	Moesin	Msn	EVWFFGLQYQDTKAFSTWLKLNKKVTAQDVR	AFS(0.933)T(0.067)WLK	AFS(11.41)T(-11.41)WLK	3	0.0141209	87.476	2	466.718	-1.8513	+	-0.000391041	-0.0620861		2	-0.0312386	0.043625	0.774729	0.106044	0.174234		2	0.140139	0.0482177	0.180787
9113	Q8CI51	359	S	Q8CI51	S359	PDZ and LIM domain protein 5	Pdlim5	RSAAAFKPVGSTSVKSPSWQRPNQAAPSTGR	S(0.998)PS(0.002)WQRPNQAAPSTGR	S(26.47)PS(-26.47)WQRPNQAAPS(-48.06)T(-38.59)GR	1	2.34881e-05	140.27	3	607.279	0.79017	+	0.152105	0.101678	0.209694	3	0.154492	0.0540472	0.313445	0.15302	0.0817073	0.248459	3	0.161062	0.0836663	0.181071
3545	G3X928;Q6NZC7	600;600	S	G3X928	S600	SEC23-interacting protein	Sec23ip	LFDILSNQRDMCVSKSPGSVAVSNGVIKHSQ	DMCVS(0.111)KS(0.878)PGS(0.011)VAVSNGVIK	DMCVS(-8.97)KS(8.97)PGS(-19.21)VAVS(-36.77)NGVIK	7	0.000804036	81.65	3	672.316	-1.8728	+	0.325987	0.351758	0.501827	3	0.393191	0.0949602	0.0497032	0.159856	0.0997842	0.190898	3	0.15018	0.0463215	0.181185
5782	Q3TSG4	362	S	Q3TSG4	S362	RNA demethylase ALKBH5	Alkbh5	ENRRSVLLPTHRRRGSFSSENYWRKSYESSE	RGS(0.998)FS(0.001)S(0.001)ENYWR	RGS(28.45)FS(-28.45)S(-32.94)ENY(-70.06)WR	3	5.56464e-05	115.91	2	734.804	0.89187	+	0.357497	0.305867	0.49405	3	0.385805	0.0972328	0.0528273	0.219352	0.0852192	0.185799	3	0.163457	0.0698016	0.181185
4087	O35450	38	S	O35450	S38	FK506-binding protein-like	Fkbpl	NAQQILNTAIPFRQRSPGLLPEALKVGVRPD	QRS(1)PGLLPEALK	QRS(56.79)PGLLPEALK	3	0.00195884	92.952	3	463.581	1.296	+	0.352105	0.11304	0.593715	3	0.352954	0.240339	0.116084	0.207622	0.0711453	0.226916	3	0.168561	0.0849144	0.181185
14559	P98083;P98083-3;P98083-2	423;268;313	Y	P98083	Y423	SHC-transforming protein 1	Shc1	PPPPCPGRELFDDPSYVNIQNLDKARQAGGG	QMLPPPPCPGRELFDDPS(0.201)Y(0.799)VNIQNLDK	QMLPPPPCPGRELFDDPS(-5.99)Y(5.99)VNIQNLDK	19	8.38722e-24	123.54	4	805.877	1.1821	+	0.988175	0.942732	0.756144	3	0.895684	0.122963	0.00329304	0.133305	0.113643	0.19711	3	0.148019	0.0436358	0.181431
10105	Q99N57;Q99N57-2	642;662	S	Q99N57	S642	RAF proto-oncogene serine/threonine-protein kinase	Raf1	RAAHTEDINACTLTTSPRLPVF_________	AAHTEDINACTLT(0.001)T(0.017)S(0.982)PRLPVF	AAHT(-133.84)EDINACT(-71.87)LT(-31.83)T(-17.62)S(17.62)PRLPVF	15	5.45419e-42	170.22	3	798.71	0.88383	+	0.753392	0.611585	0.668431	3	0.677803	0.0713661	0.00970389	0.142107	0.18557	0.139016	3	0.155564	0.026032	0.181431
971	B2RUR8;D3YYZ8;D3Z210	53;53;53	S	B2RUR8	S53	OTU domain-containing protein 7B	Otud7b	LSDFEQLRQVHAGNLSPPFSGGSTCPKTPEK	NWDVS(0.003)AALS(0.003)DFEQLRQVHAGNLS(0.978)PPFS(0.012)GGS(0.002)T(0.001)CPK	NWDVS(-24.54)AALS(-24.54)DFEQLRQVHAGNLS(18.97)PPFS(-18.97)GGS(-28.08)T(-30.63)CPK	23	1.23479e-06	78.584	4	938.935	-0.5802	+	0.487322	0.506586	0.385736	3	0.459881	0.0649304	0.0360618	0.112585	0.158634	0.179411	3	0.15021	0.0342	0.181431
538	A2AUP1;A2AUP3;Q7TS91;A2AUP5;A2AUP4;A7UAK8;A7UAK5	461;461;461;461;490;490;490	S	A2AUP1	S461		Pfkfb3	SEDAKKGPNPLMRRNSVTPLASPEPTKKPRI	RNS(0.995)VT(0.005)PLASPEPTK	RNS(23.19)VT(-23.19)PLAS(-102.96)PEPT(-130.74)K	3	3.12422e-06	138.31	3	526.263	3.2729	+	0.360537	0.353204	0.480251	3	0.397997	0.0713279	0.0464952	0.108613	0.116375	0.234421	3	0.153136	0.0705013	0.181431
3877	H9KV00;Q9QX47;H9KV15;Q9QX47-3;Q9QX47-2;Q9QX47-4;H9KV01	90;90;90;90;90;90;90	S	H9KV00	S90	Protein SON	Son	TELRYKPDLKEASRKSRCVSVQTDPTDEVPT	S(0.87)RCVS(0.115)VQT(0.013)DPT(0.002)DEVPTKK	S(8.81)RCVS(-8.81)VQT(-18.23)DPT(-26.43)DEVPT(-71.99)KK	1	0.000358755	96.773	3	709.664	-0.56191	+	0.39127		0.389627	2	0.390449	0.00116183	0.0540434	0.0886346		0.3159	2	0.202267	0.160701	0.181431
894	B1AZI6;F6SBF2	1390;126	S	B1AZI6	S1390	THO complex subunit 2	Thoc2	SKENVKGGEKTPVSGSLKSPVPRSDISEPDR	TPVS(0.006)GS(0.952)LKS(0.042)PVPR	T(-60.41)PVS(-22.08)GS(13.58)LKS(-13.58)PVPR	6	1.60818e-06	152.94	2	702.866	0.78671	+	0.283346	0.277609	0.183984	3	0.248313	0.0557844	0.149846	0.125947	0.113208	0.207447	3	0.148867	0.0511299	0.181431
13280	Q640M1	205	T	Q640M1	T205	U3 small nucleolar RNA-associated protein 14 homolog A	Utp14a	NLLHKNKQPVTDPLLTPVEKASLKAMSLEEA	NKQPVTDPLLT(1)PVEK	NKQPVT(-111.18)DPLLT(111.18)PVEK	11	9.61811e-19	166.3	3	586.973	0.88698	+	0.483473	0.470528	0.430556	3	0.461519	0.027585	0.0327705	0.107177	0.191423	0.169033	3	0.155878	0.0436367	0.182666
2945	P27546;P27546-3;E9QPW8;P27546-2;F7CK47	617;617;617;617;18	S	P27546;F7CK47	S617	Microtubule-associated protein 4;Microtubule-associated protein	Map4	VKAAEQMSTLPIDAPSPLENLEQKETPGSQP	AAEQMSTLPIDAPS(1)PLENLEQK	AAEQMS(-92.69)T(-92.69)LPIDAPS(92.69)PLENLEQK	14	1.32614e-68	167.89	3	821.389	0.96937	+	0.168497	0.0897639	0.141577	3	0.133279	0.0400173	0.386053	0.157784	0.0894459	0.20994	3	0.15239	0.060428	0.182666
479	Q8BXN9;Q8BXN9-2;A2AQJ5;A2AQJ6	540;541;544;545	S	Q8BXN9	S540	Transmembrane protein 87A	Tmem87a	VPSSVTDVALPALLDSDEERMITHFERSKME	WVEENVPSSVTDVALPALLDS(0.92)DEERMIT(0.08)HFER	WVEENVPS(-60.02)S(-56.58)VT(-48.84)DVALPALLDS(10.62)DEERMIT(-10.62)HFER	21	1.04908e-05	77.169	4	941.943	0.1511	+	0.0552254	0.0704073	0.311047	3	0.14556	0.143517	0.442664	0.105723	0.127785	0.22335	3	0.152286	0.0625239	0.182666
895	B1AZI6;F6SBF2	1393;129	S	B1AZI6	S1393	THO complex subunit 2	Thoc2	NVKGGEKTPVSGSLKSPVPRSDISEPDREQK	TPVSGSLKS(1)PVPR	T(-64.68)PVS(-53.58)GS(-37.79)LKS(37.79)PVPR	9	1.68439e-06	152.32	4	351.937	2.0303	+	0.27462	0.2675	0.34155	3	0.294557	0.0408527	0.0999088	0.128427	0.117371	0.193969	3	0.146589	0.0414033	0.182772
14004	Q920R0;Q920R0-2	504;504	T	Q920R0	T504	Alsin	Als2	LLRKAARVKTRTVVLTPTYSGEADALLPSLR	T(0.003)RT(0.003)VVLT(0.929)PT(0.059)Y(0.004)S(0.001)GEADALLPSLRTEVWTWGK	T(-24.35)RT(-25.3)VVLT(11.95)PT(-11.95)Y(-23.58)S(-27.97)GEADALLPS(-62.05)LRT(-62.05)EVWT(-64.17)WGK	7	6.18185e-05	92.449	4	857.688	4.1828	+	0.0168663	0.265855	0.221328	3	0.168016	0.13278	0.410499	0.151269	0.241098	0.122669	3	0.171679	0.0617962	0.183246
503	Q68FH0;Q68FH0-2;A2AS44;A2AS45	220;220;220;220	S	Q68FH0	S220	Plakophilin-4	Pkp4	NRAMRRVSSVPSRAQSPSYVTSTGVSPSRGS	AQS(0.996)PS(0.004)YVTSTGVSPSR	AQS(23.93)PS(-23.93)Y(-73.94)VT(-51.29)S(-55.73)T(-60.13)GVS(-87.16)PS(-87.16)R	3	3.70864e-07	136.46	2	852.385	-0.40105	+	0.196784	0.31431	0.212568	3	0.241221	0.0637872	0.15231	0.120251	0.142859	0.178369	3	0.147159	0.0292967	0.183829
1750	Q6NZJ6;E9PVC6;E9Q9E1;E9PVC5;Q6NZJ6-2	1211;1164;1204;1205;1197	S	Q6NZJ6	S1211	Eukaryotic translation initiation factor 4 gamma 1	Eif4g1	SRERPSQPEGLRKAASLTEDRGRDPVKREAT	AAS(1)LTEDR	AAS(34.69)LT(-34.69)EDR	3	0.0119042	103.31	2	471.7	0.79753	+	0.146748		0.117999	2	0.132374	0.0203283	0.392373	0.0933149		0.279378	2	0.186346	0.131566	0.183829
2690	E9QA22;E9Q624;E9QA24;E9QA23	1308;1277;85;90	S	E9QA22	S1308		Zfp644	GAGMVEVTSLLKKPASITETSFSLLMAEAAS	KPAS(0.913)IT(0.023)ET(0.05)S(0.014)FSLLMAEAAS	KPAS(12.61)IT(-15.95)ET(-12.61)S(-18.26)FS(-46.61)LLMAEAAS(-102.13)	4	8.76755e-06	107.92	2	1017.48	-2.1791	+		0.769451	0.43544	2	0.602446	0.236181	0.0230765		0.274804	0.124233	2	0.199519	0.10647	0.184397
2802	Q80TY5;E9QKX5	3045;3025	S	Q80TY5	S3045	Vacuolar protein sorting-associated protein 13B	Vps13b	TVHKTLAIKLVHNLTSPKWKDGGNGEVVTLD	LVHNLT(0.011)S(0.989)PK	LVHNLT(-19.37)S(19.37)PK	7	0.000759325	108.7	3	363.522	0.90409	+	0.411956	0.412914	0.44794	3	0.42427	0.0205046	0.0394209	0.131991	0.0742311	0.328846	3	0.178356	0.133489	0.185184
8854	Q8C3F2;Q8C3F2-3	436;436	S	Q8C3F2	S436	Constitutive coactivator of PPAR-gamma-like protein 2	Fam120c	RLGNPPLPRNQMGPISPGKPMFSRQVPQKMK	NQMGPIS(1)PGKPMFSR	NQMGPIS(42.73)PGKPMFS(-42.73)R	7	0.0111715	72.932	3	576.265	-1.7327	+	0.410288	0.408002	0.412457	3	0.410249	0.00222775	0.0443681	0.118627	0.157729	0.168911	3	0.148422	0.0264025	0.185184
2322	E9Q4Y4	141	S	E9Q4Y4	S141		Cep192	ANAASVQGQSLLGGVSPLQQVPDSALDFHLK	QANAASVQGQSLLGGVS(1)PLQQVPDSALDFHLK	QANAAS(-122.35)VQGQS(-87.92)LLGGVS(74.4)PLQQVPDS(-74.4)ALDFHLK	17	1.01392e-88	155.3	4	839.673	1.3634	+	0.364532	0.387283	0.437303	3	0.396373	0.0372271	0.0459682	0.0899095	0.176843	0.198157	3	0.15497	0.0573431	0.185184
5004	P52479;P52479-2	364;365	S	P52479	S364	Ubiquitin carboxyl-terminal hydrolase 10	Usp10	SPMAYVETKCSPPVPSPLASEKQMEVKEGLV	CSPPVPS(1)PLASEK	CS(-122.45)PPVPS(36.19)PLAS(-36.19)EK	7	1.74472e-45	170.48	2	724.828	-1.5701	+	0.371899	0.422606	0.28593	3	0.360145	0.0690919	0.0704487	0.182957	0.193486	0.117009	3	0.164484	0.0414504	0.186696
10338	Q9CYH6	163	S	Q9CYH6	S163	Ribosome biogenesis regulatory protein homolog	Rrs1	RARDDTKEWLIEVPGSADPMEDQFAKRTQAK	EWLIEVPGS(1)ADPMEDQFAK	EWLIEVPGS(130.83)ADPMEDQFAK	9	5.76624e-16	130.83	3	747.997	-0.58076	+	0.258757	0.29148	0.195002	3	0.248413	0.0490635	0.147014	0.101917	0.171405	0.179799	3	0.15104	0.0427484	0.186696
9564	Q8VBT9;Q8VBT9-3;Q8VBT9-2;A2AC05	279;202;202;202	S	Q8VBT9	S279	Tether containing UBX domain for GLUT4	Aspscr1	GQRLGGPSASLRPLTSPSANSSKSFSGPGGP	LGGPSASLRPLT(0.24)S(0.76)PSANSSK	LGGPS(-49.39)AS(-39.18)LRPLT(-5.01)S(5.01)PS(-37.31)ANS(-50.17)S(-56.96)K	13	2.05535e-105	213.71	2	1004	0.4579	+	0.69507	0.685787		2	0.690428	0.00656439	0.00822499	0.106865	0.160258		2	0.133562	0.0377545	0.187546
2408	E9Q6H8	552	S	E9Q6H8	S552		Plekha5	VQVSDQTMHSIPTSPSHGSAAAYQGFSPQRT	AMVQVSDQT(0.001)MHS(0.002)IPT(0.038)S(0.048)PS(0.863)HGS(0.046)AAAY(0.001)QGFS(0.001)PQR	AMVQVS(-35.61)DQT(-31.83)MHS(-27.11)IPT(-13.51)S(-12.52)PS(12.52)HGS(-12.72)AAAY(-28.9)QGFS(-29.61)PQR	18	7.33649e-06	67.033	4	864.139	0.62853	+		0.488706	0.385725	2	0.437215	0.0728183	0.0433354		0.0856473	0.238456	2	0.162051	0.108052	0.187546
4188	O55098	453	S	O55098	S453	Serine/threonine-protein kinase 10	Stk10	PAASKSQKANQSRPNSSALETLGGEALTNGG	ANQS(0.33)RPNS(0.806)S(0.806)ALET(0.058)LGGEALTNGGLELPSSVTPSHSK	ANQS(-5.85)RPNS(5.85)S(5.85)ALET(-13.89)LGGEALT(-49.53)NGGLELPS(-84.89)S(-84.89)VT(-88.48)PS(-93.47)HS(-98.24)K	8	1.32083e-15	101.59	4	942.438	-0.43848	+	0.269723	0.436194	0.477491	3	0.394469	0.109989	0.0529511	0.125814	0.0814553	0.291171	3	0.166147	0.110523	0.187546
4189	O55098	454	S	O55098	S454	Serine/threonine-protein kinase 10	Stk10	AASKSQKANQSRPNSSALETLGGEALTNGGL	ANQS(0.33)RPNS(0.806)S(0.806)ALET(0.058)LGGEALTNGGLELPSSVTPSHSK	ANQS(-5.85)RPNS(5.85)S(5.85)ALET(-13.89)LGGEALT(-49.53)NGGLELPS(-84.89)S(-84.89)VT(-88.48)PS(-93.47)HS(-98.24)K	9	1.32083e-15	101.59	4	942.438	-0.43848	+	0.269723	0.436194	0.477491	3	0.394469	0.109989	0.053075	0.125814	0.0814553	0.291171	3	0.166147	0.110523	0.187546
14529	P22682	672	Y	P22682	Y672	E3 ubiquitin-protein ligase CBL	Cbl	SEHPKIKPSSSANAIYSLAARPLPMPKLPPG	IKPSSSANAIY(0.931)S(0.069)LAARPLPMPK	IKPS(-46.08)S(-46.08)S(-46.08)ANAIY(11.27)S(-11.27)LAARPLPMPK	11	0.00283853	83.229	4	598.817	0.54459	+		0.195069	0.312926	2	0.253998	0.0833375	0.14851		0.114711	0.180937	2	0.147824	0.0468286	0.187546
276	Q7TMY8;Q7TMY8-3;A2AFQ0;Q7TMY8-4	3758;3758;3759;3758	S	Q7TMY8	S3758	E3 ubiquitin-protein ligase HUWE1	Huwe1	KKAKQTGRLGSSGLGSASSIQAAVRQLEAEA	LGSSGLGS(0.916)AS(0.079)S(0.005)IQAAVR	LGS(-50.21)S(-37.31)GLGS(10.61)AS(-10.61)S(-22.97)IQAAVR	8	8.69881e-16	149.18	2	820.904	1.5954	+		0.277288	0.210715	2	0.244002	0.047074	0.15987		0.0849336	0.242718	2	0.163826	0.11157	0.187546
4853	P46061	430	S	P46061	S430	Ran GTPase-activating protein 1	Rangap1	KILDPNSGEPAPVLSSPTPTDLSTFLSFPSP	ILDPNSGEPAPVLS(0.068)S(0.826)PT(0.105)PTDLSTFLS(0.01)FPS(0.99)PEK	ILDPNS(-58.47)GEPAPVLS(-10.91)S(8.97)PT(-8.97)PT(-37.82)DLS(-37.63)T(-37.63)FLS(-21.14)FPS(21.14)PEK	15	7.72395e-27	104.6	3	1167.54	-0.5321	+	0.194958	0.406659	0.380427	3	0.327348	0.115401	0.0884773	0.0968232	0.194653	0.172605	3	0.154694	0.0513155	0.18877
11678	D6RJK7;B9EKI3	360;360	T	D6RJK7	T360	TATA element modulatory factor	Tmf1	PGKGYALVPIIVSPSTPKTKVVESTEENAEE	GYALVPIIVS(0.029)PS(0.046)T(0.925)PK	GY(-114.17)ALVPIIVS(-15.01)PS(-13.03)T(13.03)PK	13	5.83368e-05	125.61	2	811.434	1.9933	+	0.537907	0.334494	0.50547	3	0.45929	0.109287	0.0350995	0.203731	0.11601	0.142734	3	0.154158	0.0449627	0.189068
13609	Q8BK35	177	T	Q8BK35	T177		Gltscr2	PRDVRKAQARLLSPPTPKAKPGPQDIIERPF	LLSPPT(1)PK	LLS(-41.57)PPT(41.57)PK	6	0.00635949	113.67	2	466.746	0.2909	+	0.227912	0.266326	0.27386	3	0.256033	0.0246425	0.129385	0.169091	0.131073	0.145512	3	0.148559	0.0191911	0.189366
6526	Q5SV85;Q5SV85-2	1067;911	S	Q5SV85	S1067	Synergin gamma	Synrg	ATFDLSVQGSHKRSLSLGDKEISRSSPSPAL	RSLS(1)LGDK	RS(-49.99)LS(49.99)LGDK	4	0.00142103	98.182	3	319.158	-1.9776	+	0.149896	0.162863	0.226535	3	0.179765	0.0410201	0.242626	0.108156	0.118695	0.21435	3	0.147067	0.0585066	0.190222
6304	Q4VAC9;Q4VAC9-2;Q4VAC9-5	1291;1290;678	S	Q4VAC9	S1291	Pleckstrin homology domain-containing family G member 3	Plekhg3	SSTVGLEEDSGKESSSPVALKGQGQGFQASA	ES(0.006)S(0.05)S(0.944)PVALK	ES(-21.8)S(-12.77)S(12.77)PVALK	4	2.07615e-06	125.75	2	499.234	0.87491	+	0.214791	0.353782	0.15036	3	0.239644	0.103963	0.176476	0.0931803	0.098436	0.346768	3	0.179462	0.144916	0.190708
7643	Q6ZPJ3	836	S	Q6ZPJ3	S836	Ubiquitin-conjugating enzyme E2 O	Ube2o	LKNMTVEQLLTGSPTSPTVEPEKPTREKKFL	NMTVEQLLTGS(0.001)PT(0.095)S(0.821)PT(0.083)VEPEKPTR	NMT(-52.51)VEQLLT(-40.47)GS(-28.26)PT(-9.38)S(9.38)PT(-9.96)VEPEKPT(-35.73)R	14	8.65985e-34	156.8	3	903.433	-0.52966	+	0.502154	0.52674	0.37925	3	0.469381	0.0790181	0.0349179	0.154183	0.115744	0.163796	3	0.144574	0.0254265	0.191122
2939	Q6A026;E9QPI5	1300;1300	S	Q6A026	S1300	Sister chromatid cohesion protein PDS5 homolog A	Pds5a	DLNKPVSKGRKRAAGSQESLEAGNAKAPKLQ	AAGS(1)QESLEAGNAK	AAGS(48.01)QES(-48.01)LEAGNAK	4	1.65953e-13	146.18	2	706.806	-0.10033	+	0.352665	0.295545	0.246708	3	0.298306	0.0530323	0.104409	0.114085	0.160679	0.166197	3	0.146987	0.028627	0.191122
9586	Q8VCF0	152	S	Q8VCF0	S152	Mitochondrial antiviral-signaling protein	Mavs	TPSCPKPVQDTQPPESPVENSEQLLQTNSGA	ETPSCPKPVQDTQPPES(0.997)PVENS(0.002)EQLLQTNSGAVAR	ET(-62.21)PS(-60.52)CPKPVQDT(-33.71)QPPES(26.2)PVENS(-26.2)EQLLQT(-39.45)NS(-46.15)GAVAR	17	4.61817e-20	99.114	3	1290.93	0.4584	+	0.395239	0.27321	0.567351	3	0.411933	0.14778	0.0502359	0.148027	0.101438	0.185419	3	0.144961	0.0420747	0.191423
13455	Q7TNF9;Q7TNF9-2	353;353	T	Q7TNF9	T353	Protein FAM117A	Fam117a	EPPEGCERVRVFEEATSPGPDLAFLTSCPDK	VRVFEEAT(0.789)S(0.21)PGPDLAFLTSCPDK	VRVFEEAT(5.74)S(-5.74)PGPDLAFLT(-39.59)S(-42.57)CPDK	8	1.14874e-05	99.93	3	872.74	-2.6264	+	0.411956	0.296906	0.640753	3	0.449872	0.175031	0.0421784	0.154579	0.0704073	0.260728	3	0.161905	0.0953718	0.192469
9264	Q8K2D3	140	S	Q8K2D3	S140	Enhancer of mRNA-decapping protein 3	Edc3	SQDVAISPQQQQCSKSYVDRHMESLSQSKSF	S(0.998)Y(0.002)VDRHMESLSQSK	S(28.18)Y(-28.18)VDRHMES(-44.19)LS(-50.56)QS(-55.37)K	1	0.00432864	80.545	3	582.922	-0.61457	+	0.493806	0.366124	0.436982	3	0.432304	0.0639696	0.0406207	0.0932503	0.106463	0.289223	3	0.162979	0.10953	0.193749
6350	Q569Z6;Q8BZN7	253;253	S	Q569Z6	S253	Thyroid hormone receptor-associated protein 3	Thrap3	SVSDLSPRERSPALKSPLQSVVVRRRSPRPS	S(1)PLQSVVVR	S(68.09)PLQS(-68.09)VVVR	1	0.000218485	120.55	2	532.779	-1.7246	+	0.311584	0.265902	0.394469	3	0.323985	0.0651742	0.082394	0.129666	0.134878	0.16391	3	0.142818	0.0184511	0.193749
12624	P16858;S4R257;D3YYI5;D3Z0Z9;S4R1W1	182;139;185;186;182	T	P16858;S4R1W1	T182	Glyceraldehyde-3-phosphate dehydrogenase	Gapdh;Gm7293;Gm5069	GIVEGLMTTVHAITATQKTVDGPSGKLWRDG	VIHDNFGIVEGLMT(0.001)T(0.001)VHAIT(0.062)AT(0.935)QK	VIHDNFGIVEGLMT(-31.34)T(-28.2)VHAIT(-11.75)AT(11.75)QK	22	8.89925e-16	110.33	3	892.447	-0.018401	+	0.0606978	0.11381	0.187969	3	0.120826	0.0639252	0.443738	0.104329	0.156882	0.177512	3	0.146241	0.037734	0.193749
8405	Q8BMB0;Q8BMB0-3	782;768	S	Q8BMB0	S782	Protein EMSY	Emsy	SQMAVPIQMTQEKRHSPESPSIAVVESELVA	RHS(0.948)PES(0.043)PS(0.01)IAVVESELVAEYITTVSHR	RHS(13.48)PES(-13.48)PS(-19.88)IAVVES(-59.7)ELVAEY(-91.49)IT(-94.42)T(-95.39)VS(-96.16)HR	3	2.98516e-17	96.793	4	769.13	1.4018	+	-0.100634	0.0299111		2	-0.0353613	0.0923091	0.787521	0.0895357	0.199042		2	0.144289	0.0774325	0.194053
1281	Q8BSQ9;D3YYF2;E9Q7L3;D3Z1W6;E9Q7L2;Q8BSQ9-2;D3Z1N4;E9Q4Y5;F8VQD1;F6THL5	948;947;948;948;963;916;963;948;963;906	S	Q8BSQ9	S948	Protein polybromo-1	Pbrm1	DSSGTTGLSGLHRTYSQDCSFKNSMYHVGDY	TYS(1)QDCSFK	T(-35.23)Y(-60.16)S(35.23)QDCS(-49.83)FK	3	0.000798025	104.17	2	608.223	-1.2652	+	0.645324	0.661245	0.454458	3	0.587009	0.115068	0.0194345	0.0589012	0.226394	0.267212	3	0.184169	0.110388	0.195901
1536	Q9QXK2;D3Z734;D3Z733;E9Q392	103;103;103;103	S	Q9QXK2	S103	E3 ubiquitin-protein ligase RAD18	Rad18	ARTHLLQFALESPPISPVSSTSKKVVVKVHN	THLLQFALES(1)PPIS(1)PVSSTSKK	T(-54.25)HLLQFALES(54.25)PPIS(42.97)PVS(-42.97)S(-43.78)T(-44.35)S(-50.36)KK	14	2.13968e-85	178.91	3	843.08	-0.34712	+	0.616717	0.697081	0.415952	3	0.576583	0.144798	0.0229732	0.124904	0.165185	0.148375	3	0.146155	0.0202321	0.195901
11929	E9Q1K3;F8WHZ9;D3Z0T1;Q9QYC0-2;F8WGR0;Q9QYC0	11;11;11;11;11;11	T	E9Q1K3;Q9QYC0-2;Q9QYC0	T11	Alpha-adducin	Add1	_____MNGDTRAAVVTSPPPTTAPHKERYFD	AAVVT(0.875)S(0.125)PPPTTAPHK	AAVVT(8.44)S(-8.44)PPPT(-36.31)T(-40.4)APHK	5	0.000294095	106.82	3	518.596	-1.2897	+	0.329601	0.258901	0.320917	3	0.30314	0.0385575	0.0958597	0.140429	0.134209	0.153638	3	0.142759	0.00992183	0.195901
3662	Q62136;G5E8J4	658;658	S	Q62136	S658	Tyrosine-protein phosphatase non-receptor type 21	Ptpn21	LTHGFEGLRLKERTVSASAADVAPRTFSAGS	ERT(0.032)VS(0.957)AS(0.011)AADVAPR	ERT(-14.71)VS(14.71)AS(-19.57)AADVAPR	5	0.00255835	126.43	3	503.907	-0.10392	+	0.659479		0.792393	2	0.725936	0.0939842	0.00741004	0.128024		0.183215	2	0.15562	0.0390258	0.197052
13707	Q8C156	46	T	Q8C156	T46	Condensin complex subunit 2	Ncaph	PPASRPGKAPLGTPKTPVLEDFPQNDDEKER	APLGTPKT(1)PVLEDFPQNDDEK	APLGT(-38.62)PKT(38.62)PVLEDFPQNDDEK	8	5.14122e-24	155.92	3	797.709	1.7241	+	0.255055	0.323561	0.368749	3	0.315789	0.057244	0.0867867	0.123603	0.069261	0.372061	3	0.188308	0.161437	0.197749
5159	P59729;Q3U332	501;421	S	P59729	S501	Ras and Rab interactor 3	Rin3	ASSEKQATGASWEGLSPVRQAGMQHLQVQSS	QAT(0.001)GAS(0.02)WEGLS(0.977)PVRQAGMQHLQVQS(0.002)S(0.001)SCPQSSPEFK	QAT(-29.47)GAS(-16.96)WEGLS(16.96)PVRQAGMQHLQVQS(-28.08)S(-31.26)S(-35.34)CPQS(-51.62)S(-50.24)PEFK	11	7.34399e-06	74.675	4	995.957	0.63936	+	0.217589	0.334715		2	0.276152	0.0828205	0.104075	0.090182	0.186222		2	0.138202	0.0679102	0.197749
8244	Q8BH07	80	S	Q8BH07	S80	ADP-ribosylation factor-like protein 6-interacting protein 6	Arl6ip6	SETKRAPLLPRVGDGSPVLPDKRNGIFPATA	VGDGS(1)PVLPDKR	VGDGS(70.37)PVLPDKR	5	2.24651e-05	134.04	3	440.55	1.2757	+	0.258542	0.250249	0.363863	3	0.290885	0.0633372	0.104075	0.145846	0.0968058	0.185127	3	0.142593	0.0442502	0.197749
7683	Q6ZQK5;Q6ZQK5-2	521;503	S	Q6ZQK5	S521	Arf-GAP with coiled-coil, ANK repeat and PH domain-containing protein 2	Acap2	KYVERKFVDKYSALLSPSEQEKRIISKSCED	YSALLS(0.986)PS(0.014)EQEK	Y(-91.75)S(-98.45)ALLS(18.61)PS(-18.61)EQEK	6	1.44281e-23	163.02	2	716.324	0.12718	+	0.262285	0.298023	0.304562	3	0.28829	0.0227571	0.104685	0.0789381	0.165808	0.214442	3	0.153063	0.0686453	0.197749
10457	Q9D394-2;Q9D394-4	89;89	S	Q9D394-2	S89			RPPPQRAWRTPPSPGSPLPFLLLSYPSGGSG	T(0.007)PPS(0.007)PGS(0.986)PLPFLLLSYPSGGSGGGGK	T(-21.57)PPS(-21.57)PGS(21.57)PLPFLLLS(-57.11)Y(-79.09)PS(-96.65)GGS(-115.28)GGGGK	7	1.70055e-33	122.47	3	836.412	0.6042	+		0.313909	0.280776	2	0.297343	0.0234285	0.108777		0.139533	0.154381	2	0.146957	0.0104994	0.197749
7914	Q80U49	653	S	Q80U49	S653	Centrosomal protein of 170 kDa protein B	Cep170b	GMAPQMEQQSLLVPGSPGGQKWVSRWASLAD	APGMAPQMEQQSLLVPGS(1)PGGQK	APGMAPQMEQQS(-73.69)LLVPGS(73.69)PGGQK	18	3.73595e-16	106.86	3	796.708	-0.8457	+	0.304318	0.233859		2	0.269088	0.0498223	0.110488	0.265584	0.0715506		2	0.168567	0.137202	0.197749
5703	Q3TCJ1	280	S	Q3TCJ1	S280	BRISC complex subunit Abro1	Fam175b	LLSRQMPSESLEPAFSPRMSYSGFSAEGRST	QMPSESLEPAFS(1)PR	QMPS(-122.78)ES(-101.82)LEPAFS(101.82)PR	12	5.38133e-19	148.69	2	828.36	-1.4494	+	0.294907	0.263802	0.26925	3	0.275986	0.0166107	0.115136	0.125298	0.147862	0.155939	3	0.143033	0.0158812	0.197749
9538	Q8R574	240	S	Q8R574	S240	Phosphoribosyl pyrophosphate synthase-associated protein 2	Prpsap2	RHSPPMVRSVAAIHPSLEIPMLIPKEKPPIT	S(0.002)VAAIHPS(0.998)LEIPMLIPK	S(-27.96)VAAIHPS(27.96)LEIPMLIPK	8	0.0014742	72.21	3	632.674	0.22755	+		0.224326	0.323846	2	0.274086	0.0703715	0.126146		0.168674	0.137356	2	0.153015	0.0221454	0.197749
11044	Q9QZK7	264	S	Q9QZK7	S264	Docking protein 3	Dok3	AAIARQRERLPELAMSPPCPLPRALSLPSLE	LPELAMS(1)PPCPLPR	LPELAMS(107.51)PPCPLPR	7	9.49612e-05	119.08	2	829.396	1.3573	+	0.270609	0.202733	0.226067	3	0.233137	0.0344855	0.159943	0.165122	0.17693	0.117606	3	0.153219	0.0314018	0.197749
9249	Q8K224	674	S	Q8K224	S674	N-acetyltransferase 10	Nat10	LEEKVLETPQEIRTVSSEAVSLLEEVITPRK	T(0.021)VS(0.951)S(0.028)EAVSLLEEVITPRK	T(-16.56)VS(15.35)S(-15.35)EAVS(-57.04)LLEEVIT(-137.57)PRK	3	1.79557e-16	149.33	3	680.02	0.50209	+	0.190023	0.147862	0.221111	3	0.186332	0.0367639	0.230485	0.169296	0.077949	0.201785	3	0.149676	0.0642067	0.197749
2953	P27546;P27546-3;E9QPW8;P27546-2	480;480;480;480	S	P27546	S480	Microtubule-associated protein 4;Microtubule-associated protein	Map4	ETNLGMAKDMSPLPESEVTLGKDVVILPETK	DMS(0.131)PLPES(0.869)EVTLGK	DMS(-8.23)PLPES(8.23)EVT(-51.09)LGK	8	4.91848e-05	118.61	3	528.241	0.5721	+		0.154698	0.162974	2	0.158836	0.00585197	0.319548		0.0838608	0.229752	2	0.156806	0.103161	0.197749
5668	Q14B71;F6VP65	572;127	S	Q14B71	S572	Cell division cycle-associated protein 2	Cdca2	CFYGPRDIASKKPLLSPIPELPEVSEATPLA	KPLLS(1)PIPELPEVSEATPLADCTQGTSSDDFNK	KPLLS(40.42)PIPELPEVS(-40.42)EAT(-44.89)PLADCT(-64.66)QGT(-71.85)S(-69.81)S(-71.85)DDFNK	5	1.4014e-19	93.494	4	909.931	1.706	+	0.0950996	0.144979	0.124939	3	0.121672	0.0250995	0.410485	0.0844577	0.121757	0.263396	3	0.156537	0.0944034	0.197749
6598	Q5U4H9;J3QND8	583;583	S	Q5U4H9	S583		Ncoa4;Gm6768	DKWLLRKKAQEAFLNSPLQEERNFRPDCYGL	KAQEAFLNS(1)PLQEER	KAQEAFLNS(65.37)PLQEER	9	1.47813e-09	139.74	3	613.959	3.3517	+	0.0746336	0.190976	0.0482498	3	0.10462	0.0759411	0.55806	0.109601	0.188675	0.149654	3	0.14931	0.0395382	0.197749
11277	Q9Z206	21	S	Q9Z206	S21	Neuroepithelial cell-transforming gene 1 protein	Net1	AAQKQPRPRRRSRRVSMLSEEPAAGLPADTP	RVS(0.96)MLS(0.04)EEPAAGLPADTPGPAANER	RVS(13.78)MLS(-13.78)EEPAAGLPADT(-64.98)PGPAANER	3	9.82294e-06	84.665	3	872.742	0.75849	+		-0.0556358	0.0341636	2	-0.0107361	0.0634977	0.793196		0.115311	0.171727	2	0.143519	0.0398921	0.197749
4457	P13405	605	S	P13405	S605	Retinoblastoma-associated protein	Rb1	QGNHTAADMYLSPLRSPKKRTSTTRVNSAAN	DGEGPDNLEPACPLS(0.021)LPLQGNHT(0.307)AADMY(0.348)LS(0.39)PLRS(0.933)PKK	DGEGPDNLEPACPLS(-13)LPLQGNHT(-1.09)AADMY(-0.54)LS(0.54)PLRS(11.38)PKK	34	0.00246126	60.762	4	1037.98	0.25585	+	-0.0324848	0.0755835	0.0218971	3	0.0216653	0.0540345	0.941725	0.137505	0.0720292	0.274472	3	0.161335	0.103304	0.197749
7416	Q6P5D8	1922	S	Q6P5D8	S1922	Structural maintenance of chromosomes flexible hinge domain-containing protein 1	Smchd1	IDLIQQYRTALYRLSSVNEDLDNQLQYLHTP	LS(0.18)S(0.82)VNEDLDNQLQYLHTPDMKK	LS(-6.58)S(6.58)VNEDLDNQLQY(-38.61)LHT(-62.4)PDMKK	3	0.000161612	76.133	4	667.814	-0.71495	+	0.241546		0.119764	2	0.180655	0.0861133	0.296943	0.122542		0.186279	2	0.154411	0.0450686	0.199273
6676	Q60864	16	S	Q60864	S16	Stress-induced-phosphoprotein 1	Stip1	MEQVNELKEKGNKALSAGNIDDALQCYSEAI	ALS(1)AGNIDDALQCYSEAIKLDPQNHVLYSNR	ALS(54.19)AGNIDDALQCY(-54.19)S(-63.22)EAIKLDPQNHVLY(-90.45)S(-91.73)NR	3	1.35369e-09	93.492	4	889.67	-1.1792	+	0.248047	0.165541	0.0772227	3	0.163604	0.0854286	0.34483	0.136154	0.156882	0.138489	3	0.143842	0.0113535	0.200147
5309	P70295;Q3U3K9	290;319	S	P70295	S290	Ancient ubiquitous protein 1	Aup1	RLRPQSVQSSFPSPPSPSSDVQLTTLAHRVK	LRPQSVQSSFPS(0.001)PPS(0.971)PS(0.025)S(0.003)DVQLTTLAHR	LRPQS(-65.61)VQS(-55.26)S(-55.26)FPS(-28.8)PPS(15.9)PS(-15.9)S(-25.39)DVQLT(-38.5)T(-43.21)LAHR	15	1.27424e-24	116.55	3	1033.85	-0.39548	+	0.304253	0.28051	0.284414	3	0.289726	0.0127317	0.105673	0.194119	0.151155	0.116089	3	0.153788	0.0390815	0.201775
11133	Q9WTV7	163	S	Q9WTV7	S163	E3 ubiquitin-protein ligase RLIM	Rlim	SQTSENESEPSTRRLSVENMESSSQRQMENS	RLS(1)VENMESSSQR	RLS(73.14)VENMES(-73.14)S(-73.14)S(-78.42)QR	3	3.47667e-09	150.9	3	534.903	0.37147	+	0.363142	0.35993	0.50791	3	0.410327	0.0845246	0.0441765	0.13553	0.0801212	0.22773	3	0.147794	0.0745644	0.202276
2717	Q9WV60;E9QAQ5	9;9	S	Q9WV60	S9	Glycogen synthase kinase-3 beta	Gsk3b	_______MSGRPRTTSFAESCKPVQQPSAFG	T(0.039)T(0.039)S(0.921)FAESCKPVQQPSAFGSMK	T(-13.71)T(-13.71)S(13.71)FAES(-33.97)CKPVQQPS(-120.11)AFGS(-122.67)MK	3	5.98798e-14	144.58	3	790.016	0.91407	+	0.497524	0.469336	0.416745	3	0.461201	0.0409995	0.0343473	0.0884003	0.20828	0.1673	3	0.15466	0.0609312	0.202967
12759	P48678;P48678-2;D3YUF7	24;24;24	T	P48678	T24	Prelamin-A/C;Lamin-A/C	Lmna	ATRSGAQASSTPLSPTRITRLQEKEDLQELN	SGAQASSTPLS(0.089)PT(0.911)R	S(-80.12)GAQAS(-49.21)S(-37.73)T(-42.28)PLS(-10.11)PT(10.11)R	13	0.000293998	122.47	2	720.33	-0.54684	+	-0.028367		0.137505	2	0.0545689	0.117289	0.978711	0.118438		0.189741	2	0.15409	0.0504182	0.203565
5660	Q14B62;Q14B62-2	672;567	S	Q14B62	S672	Patched domain-containing protein 1	Ptchd1	NREELYDLLETLRRLSVTSKVKFIVFNPSFV	RLS(0.988)VT(0.011)S(0.001)K	RLS(19.44)VT(-19.44)S(-32.74)K	3	0.0152927	74.165	3	290.82	0.032712	+	0.154546	0.0924399		2	0.123493	0.0439154	0.370398	0.205651	0.0793622		2	0.142507	0.0893	0.203974
11580	Q99JX3;A2ATI8;A2ATI6;Q99JX3-2;A2ATI9	225;225;225;157;205	T	Q99JX3	T225	Golgi reassembly-stacking protein 2	Gorasp2	GKKISLPGQMTGTPITPLKDGFTEVQLSSVS	ISLPGQMTGT(1)PIT(1)PLK	IS(-114.7)LPGQMT(-47.15)GT(47.15)PIT(83.79)PLK	13	5.17482e-135	212.26	3	605.291	0.47754	+	0.396931	0.431364	0.30156	3	0.376618	0.0672436	0.0631146	0.0572084	0.176323	0.302936	3	0.178823	0.122883	0.204733
9209	Q8K0D0;Q8K0D0-2	165;81	S	Q8K0D0	S165	Cyclin-dependent kinase 17	Cdk17	DIRIPDGYLEKLQISSPPFDQPMSRRSRRAS	LQIS(0.154)S(0.846)PPFDQPMSR	LQIS(-7.41)S(7.41)PPFDQPMS(-65.36)R	5	0.000429684	93.427	2	841.884	2.8122	+	0.269186		0.289307	2	0.279247	0.014228	0.117703	0.157085		0.153106	2	0.155096	0.00281334	0.204733
2116	E9Q1K3;F8WHZ9;D3Z0T1;Q9QYC0-2;F8WGR0;Q9QYC0	59;59;59;59;59;59	S	E9Q1K3;Q9QYC0-2;Q9QYC0	S59	Alpha-adducin	Add1	DLRQDFNMMEQKKRVSMILQSPAFCEELESM	RVS(1)MILQSPAFCEELESMIQEQFKK	RVS(38.06)MILQS(-38.06)PAFCEELES(-77.1)MIQEQFKK	3	0.000847512	85.518	4	777.871	-1.7849	+	0.0463		0.228104	2	0.137202	0.128555	0.458596	0.0759741		0.346739	2	0.211357	0.19146	0.204733
9105	Q8CI51;Q8CI51-2	137;137	S	Q8CI51	S137	PDZ and LIM domain protein 5	Pdlim5	NMAYNKAPRPFGSVSSPKVTSIPSPSSAFTP	APRPFGSVSS(1)PK	APRPFGS(-68.59)VS(-37.17)S(37.17)PK	10	1.41496e-06	157.37	2	655.319	-2.0607	+	0.0814553	0.0492568	0.06871	3	0.066474	0.0162153	0.725519	0.138066	0.0844333	0.205979	3	0.142826	0.0609127	0.205996
9790	Q91X84;Q91X84-2	396;97	S	Q91X84	S396	CREB-regulated transcription coactivator 3	Crtc3	GPSRRRQPPVSPLTLSPGPEAHQGFSRQLSA	RQPPVSPLT(0.006)LS(0.994)PGPEAHQGFSR	RQPPVS(-57.17)PLT(-22.27)LS(22.27)PGPEAHQGFS(-33.17)R	11	7.58724e-05	87.352	4	610.305	-0.49179	+	0.55938	0.425094	0.440752	3	0.475075	0.0734286	0.0312429	0.160861	0.214817	0.107421	3	0.161033	0.0536983	0.207138
9271	Q8K2J7;Q8K2J7-2	162;92	S	Q8K2J7	S162	RELT-like protein 1	Rell1	IESPVTPSTPGSPPVSPGPLSPGATPGKHVC	AMVADNSVGDIESPVT(0.005)PS(0.097)T(0.229)PGS(0.684)PPVS(0.88)PGPLS(0.101)PGAT(0.004)PGK	AMVADNS(-40.91)VGDIES(-39.21)PVT(-22.12)PS(-8.78)T(-4.95)PGS(4.95)PPVS(9.72)PGPLS(-9.72)PGAT(-24.71)PGK	26	4.5383e-06	65.445	3	1244.24	-1.7149	+		0.435765	0.317792	2	0.376778	0.0834195	0.0677251		0.162325	0.135697	2	0.149011	0.0188294	0.207138
9759	Q91W45	23	S	Q91W45	S23	Polyadenylate-binding protein-interacting protein 2B	Paip2b	SARISIMNGSSVASTSPSVKCKEDQGLNGHE	ISIMNGSSVAST(0.003)S(0.988)PS(0.009)VK	IS(-98.99)IMNGS(-96.18)S(-93.55)VAS(-48.85)T(-25.32)S(20.51)PS(-20.51)VK	13	1.9896e-136	215.88	3	582.278	1.7831	+	0.151094	-0.0108262	0.352441	3	0.164236	0.18199	0.531307	0.173511	0.0522706	0.300683	3	0.175488	0.124218	0.207138
13927	Q8VBT9;Q8VBT9-3;Q8VBT9-2;A2AC05	278;201;201;201	T	Q8VBT9	T278	Tether containing UBX domain for GLUT4	Aspscr1	GGQRLGGPSASLRPLTSPSANSSKSFSGPGG	LGGPSAS(0.009)LRPLT(0.79)S(0.154)PS(0.039)ANS(0.006)S(0.002)K	LGGPS(-37.73)AS(-19.38)LRPLT(7.09)S(-7.09)PS(-13.12)ANS(-21.42)S(-25.41)K	12	3.63401e-05	113.89	3	669.668	-1.8588	+		0.677224	0.691777	2	0.6845	0.0102909	0.0087336		0.155913	0.138388	2	0.14715	0.0123919	0.207267
2072	Q8BWW4;E9Q066;G3X9Q6	69;68;69	S	Q8BWW4	S69	La-related protein 4	Larp4	TELSEDMCKEYEVMYSPSCETTRNTADVEES	EYEVMYS(1)PSCETTR	EY(-194.15)EVMY(-128.85)S(41.16)PS(-41.16)CET(-65.8)T(-63.95)R	7	4.63499e-263	251.04	2	916.349	-0.14518	+	0.587015	0.556278	0.56122	3	0.568171	0.016505	0.016971	0.149127	0.14145	0.134351	3	0.141643	0.00738984	0.207586
994	B2RY04	1780	S	B2RY04	S1780	Dedicator of cytokinesis protein 5	Dock5	SLQLVDSRLTPFHSPSPLQSTALSPPPLTPK	LTPFHS(0.038)PS(0.962)PLQS(0.012)T(0.011)ALS(0.977)PPPLTPK	LT(-37.19)PFHS(-14.19)PS(14.19)PLQS(-19.49)T(-19.49)ALS(19.49)PPPLT(-53.56)PK	8	4.54212e-27	130.8	3	858.42	-0.734	+	0.515847	0.454357	0.389936	3	0.45338	0.0629612	0.0366602	0.124539	0.0987129	0.192418	3	0.138557	0.0483994	0.207906
3217	P48725-2;P48725-3;P48725;F8VPV0	1043;1959;1959;1959	S	P48725-2	S1043	Pericentrin	Pcnt	EDFIVTSFDSQELLTSPSHELARRSDGSRKS	DVEDFIVTSFDSQELLT(0.168)S(0.792)PS(0.04)HELAR	DVEDFIVT(-71.98)S(-57.98)FDS(-39.78)QELLT(-6.73)S(6.73)PS(-13.01)HELAR	18	3.27915e-38	132.86	3	972.45	-1.1362	+		0.253144	0.246647	2	0.249895	0.00459428	0.148759		0.167731	0.132586	2	0.150158	0.0248514	0.209938
4573	P20152;A2AKJ2	72;72	S	P20152	S72	Vimentin	Vim	PGGAYVTRSSAVRLRSSVPGVRLLQDSVDFS	LRS(0.961)S(0.039)VPGVR	LRS(13.92)S(-13.92)VPGVR	3	0.000512757	117.14	3	350.853	-1.5458	+		0.147862	0.272012	2	0.209937	0.0877872	0.219664		0.0736817	0.251564	2	0.162623	0.125782	0.210043
665	A3KGS3;F7CGP0;A3KGS3-2	486;157;486	S	A3KGS3	S486	Ral GTPase-activating protein subunit alpha-2	Ralgapa2	ESSGHKRSSSWGRTYSFTSAMSRGCVTEEDN	T(0.001)YS(0.981)FT(0.017)S(0.001)AMSR	T(-32.87)Y(-41.37)S(17.62)FT(-17.62)S(-29.38)AMS(-67.42)R	3	0.00277359	88.163	2	615.747	-0.30225	+		0.310927	0.133169	2	0.222048	0.125694	0.230241		0.105169	0.175952	2	0.140561	0.0500511	0.210043
11045	Q9QZK7	308	S	Q9QZK7	S308	Docking protein 3	Dok3	LPTPRKLPLTDPGPQSLPLLLSPTQEGPASG	KLPLTDPGPQS(1)LPLLLSPTQEGPASGLYASVCK	KLPLT(-34.08)DPGPQS(34.08)LPLLLS(-52.96)PT(-63.4)QEGPAS(-79.42)GLY(-88.76)AS(-106)VCK	11	4.03663e-73	135.47	3	1172.27	-0.94994	+	0.0665495	0.151768	0.116958	3	0.111758	0.0428465	0.464744	0.14843	0.081995	0.196311	3	0.142245	0.0574083	0.210043
5844	Q3U109;Q80XK2;B2RRD7;E9PXP1	859;858;858;859	S	Q3U109	S859		Brpf1	LTPHPAACDKDGQTDSAAEESSSQETSKGLG	DGQTDS(1)AAEESSSQETSK	DGQT(-42.8)DS(42.8)AAEES(-67.6)S(-73.12)S(-75.58)QET(-130.92)S(-150.26)K	6	2.22416e-96	204.38	2	968.868	0.9944	+	0.0715506		0.0689033	2	0.070227	0.00187192	0.700398	0.273664		0.119701	2	0.196683	0.108868	0.210746
216	P22091;A2AD40	122;122	S	P22091	S122	T-cell acute lymphocytic leukemia protein 1 homolog	Tal1	SAPAELPGDGRMVQLSPPALAAPAGPGRALL	MVQLS(1)PPALAAPAGPGR	MVQLS(70.45)PPALAAPAGPGR	5	1.48135e-10	143.17	3	571.623	-2.1792	+	0.27538	0.314268	0.523661	3	0.371103	0.133542	0.0638207	0.131414	0.0845405	0.207594	3	0.141183	0.0621058	0.211354
8884	Q8C5L6	301	S	Q8C5L6	S301	Inositol polyphosphate 5-phosphatase K	Inpp5k	TDRILWRLKRQPSQASPLASSVPTSYFLLTL	RQPS(0.062)QAS(0.932)PLAS(0.002)S(0.003)VPTSYFLLTLK	RQPS(-11.74)QAS(11.74)PLAS(-25.89)S(-25)VPT(-48.75)S(-51.76)Y(-56.1)FLLT(-64.48)LK	7	5.02146e-06	93.551	3	857.779	1.0265	+	0.260525	0.195568		2	0.228046	0.0459315	0.146311	0.112861	0.126424		2	0.119642	0.00959015	0.211582
4533	P17751;H7BXC3	262;130	S	P17751	S262	Triosephosphate isomerase	Tpi1	VNDGVAQSTRIIYGGSVTGATCKELASQPDV	IIYGGS(0.982)VT(0.018)GATCK	IIY(-85.94)GGS(17.45)VT(-17.45)GAT(-48.92)CK	6	4.97876e-105	183.23	2	703.823	-1.1821	+	0.557303	-0.0650221		2	0.24614	0.44005	0.843573	0.424223	0.0592983		2	0.241761	0.258041	0.212574
5508	P98083;P98083-3;P98083-2	422;267;312	S	P98083	S422	SHC-transforming protein 1	Shc1	LPPPPCPGRELFDDPSYVNIQNLDKARQAGG	QMLPPPPCPGRELFDDPS(0.762)Y(0.238)VNIQNLDK	QMLPPPPCPGRELFDDPS(5.05)Y(-5.05)VNIQNLDK	18	4.26538e-09	101.41	3	1074.17	1.6138	+	0.700271	0.710261	1.00828	3	0.806271	0.175018	0.00484222	0.138191	0.132035	0.140748	3	0.136991	0.00447824	0.212746
6054	Q3UHX2	176	S	Q3UHX2	S176	28 kDa heat- and acid-stable phosphoprotein	Pdap1	RKAKDDATLSGKRMQSLSLNK__________	RMQS(0.999)LS(0.001)LNK	RMQS(29.2)LS(-29.2)LNK	4	0.00154893	91.123	3	386.19	1.2306	+	0.441192		0.441243	2	0.441218	3.62169e-05	0.0388259	0.142915		0.158891	2	0.150903	0.0112968	0.212746
8402	Q8BMB0;Q8BMB0-3	1079;1065	S	Q8BMB0	S1079	Protein EMSY	Emsy	TVTKITGGSSVPKLTSPVTSISPIQASEKTA	LT(0.011)S(0.989)PVTSISPIQASEK	LT(-19.42)S(19.42)PVT(-52.47)S(-59.66)IS(-77.94)PIQAS(-125.4)EK	3	9.66831e-46	166.21	2	869.437	0.043989	+	0.46355	0.386089	0.299037	3	0.382892	0.082303	0.0631146	0.137761	0.152869	0.130352	3	0.140327	0.0114759	0.212746
6224	Q9Z1S8;Q3ZB57	402;402	S	Q9Z1S8	S402	GRB2-associated-binding protein 2	Gab2	NTLPAMDNSRLHRASSCETYEYPARGSGESA	AS(0.026)S(0.974)CETYEYPAR	AS(-15.69)S(15.69)CET(-54.63)Y(-115.44)EY(-142.24)PAR	3	1.07398e-31	167.61	2	757.287	0.81096	+	0.207392	0.20393	0.336733	3	0.249352	0.0756941	0.137989	0.181477	0.0948902	0.152316	3	0.142895	0.0440557	0.212746
12288	O08550;F8WJ40	506;506	T	O08550	T506	Histone-lysine N-methyltransferase 2B	Kmt2b	EREAARSGPEGTLSPTPNPSTTTGSPLEDSP	SGPEGT(0.001)LS(0.076)PT(0.816)PNPS(0.031)T(0.022)T(0.022)T(0.028)GS(0.002)PLEDSPTVVPK	S(-33.48)GPEGT(-27.39)LS(-10.32)PT(10.32)PNPS(-14.16)T(-15.62)T(-15.62)T(-14.65)GS(-25.15)PLEDS(-50)PT(-58.75)VVPK	10	5.88356e-33	114.62	3	1010.81	0.29357	+	0.16891		0.351894	2	0.260402	0.129389	0.137989	0.139836		0.160547	2	0.150191	0.0146451	0.212746
5644	Q149C2	316	S	Q149C2	S316	TRAF3-interacting protein 1	Traf3ip1	PEKKSSSSGEISRKLSDGSFKDVKAEMEADI	KLS(1)DGSFK	KLS(42.18)DGS(-42.18)FK	3	0.000767555	107.45	3	321.151	1.0739	+	0.174932	0.203713	0.374471	3	0.251039	0.10786	0.14448	0.131232	0.0718452	0.243866	3	0.148981	0.0873732	0.212746
1011	Q8BTM8;B7FAU9;B7FAV1	2152;2144;2088	S	Q8BTM8	S2152	Filamin-A	Flna	EGRVKESITRRRRAPSVANIGSHCDLSLKIP	RAPS(1)VANIGSHCDLSLK	RAPS(54.54)VANIGS(-54.54)HCDLS(-96.94)LK	4	1.79703e-05	118.21	3	635.64	-0.98046	+	0.196259	0.203115	0.254121	3	0.217832	0.0316142	0.176476	0.109182	0.0694831	0.377382	3	0.185349	0.167486	0.212746
4178	O54992;O54992-4;O54992-3;O54992-2;O54992-5;D3Z2B0	212;63;63;212;212;111	S	O54992	S212	MAP kinase-activated protein kinase 5	Mapkapk5	AQRRHQKEKSGIIPTSPTPYTYNKSCDLWSL	SGIIPT(0.039)S(0.957)PT(0.004)PYTYNK	S(-83.17)GIIPT(-13.94)S(13.94)PT(-23.71)PY(-64.86)T(-45.6)Y(-75.87)NK	7	1.69041e-18	149.86	2	859.905	-0.82883	+	0.364889	0.42669	0.401385	3	0.397654	0.0310692	0.0472991	0.0937727	0.0937718	0.265969	3	0.151171	0.0994176	0.213481
856	B1AY10-2;B1AY10-3;B1AY10	81;81;81	S	B1AY10-2	S81	Transcriptional repressor NF-X1	Nfx1	SAVHQHSYASGSKPKSPQGFFQSSNKSLKNH	PKS(1)PQGFFQSSNK	PKS(85.31)PQGFFQS(-85.31)S(-91.12)NK	3	0.000554113	102.29	3	511.236	0.76035	+	0.34735	0.3265	0.407468	3	0.360439	0.0420412	0.0627543	0.152421	0.0605845	0.255801	3	0.156269	0.0976651	0.213481
9533	Q8R550-3;Q8R550-2;Q8R550;B1AZ85;Q8R550-8;E9Q0C1	193;230;274;171;230;193	S	Q8R550-3	S193	SH3 domain-containing kinase-binding protein 1	Sh3kbp1	FGDIFKDKPIKLRPRSIEVENDFLPVEKTIG	S(1)IEVENDFLPVEK	S(128.72)IEVENDFLPVEK	1	8.74159e-32	171.98	2	799.871	-1.3303	+	0.279553	0.255827	0.228457	3	0.254612	0.0255698	0.13474	0.154914	0.110051	0.147575	3	0.137513	0.0240648	0.213481
4915	P48678;P48678-2;D3YUF7	18;18;18	S	P48678	S18	Prelamin-A/C;Lamin-A/C	Lmna	TPSQRRATRSGAQASSTPLSPTRITRLQEKE	SGAQAS(0.002)S(0.907)T(0.056)PLS(0.032)PT(0.001)RIT(0.002)R	S(-63.41)GAQAS(-26.11)S(12.06)T(-12.06)PLS(-14.53)PT(-31.41)RIT(-26.11)R	7	6.74559e-06	139.43	2	905.446	0.067133	+	0.127591	0.0997152	0.112293	3	0.1132	0.0139599	0.445945	0.153601	0.104111	0.15489	3	0.137534	0.028952	0.213481
10268	Q9CU65	837	S	Q9CU65	S837	Zinc finger MYM-type protein 2	Zmym2	CQTSRTKMTGSAPPPSPTPNKEMKNKAILCK	MTGSAPPPS(0.996)PT(0.004)PNK	MT(-89.51)GS(-71.07)APPPS(24.32)PT(-24.32)PNK	9	4.41765e-25	157.84	2	731.326	-0.0082532	+	0.365001	0.502441	0.611402	3	0.492948	0.123474	0.0277814	0.0424358	0.248366	0.33677	3	0.209191	0.151027	0.213756
2737	Q8CG79;E9QJU8	206;212	S	Q8CG79	S206	Apoptosis-stimulating of p53 protein 2	Tp53bp2;Trp53bp2	KKVRALKGHVEQKRLSNGKLVEEIEQMNSLF	RLS(1)NGKLVEEIEQMNSLFQQK	RLS(64.71)NGKLVEEIEQMNS(-64.71)LFQQK	3	0.000331396	89.502	4	643.571	-0.17539	+	0.18307	0.256622		2	0.219846	0.0520085	0.15146	0.216911	0.0721028		2	0.144507	0.102395	0.213756
7380	Q6P1H6;Q6P1H6-3;Q6P1H6-2;Q6P1H6-4	275;275;275;275	S	Q6P1H6	S275	Ankyrin repeat and LEM domain-containing protein 2	Ankle2	ICDYLPSPNKTTPLLSPVKAVPLGGSDGLKA	TTPLLS(1)PVK	T(-54.48)T(-55.91)PLLS(54.48)PVK	6	0.000695547	111.63	2	518.278	-0.17423	+	0.164888	0.185769	0.229177	3	0.193278	0.032796	0.213954	0.094906	0.150357	0.169687	3	0.138317	0.0388174	0.214085
13398	Q6PFD9	1069	T	Q6PFD9	T1069	Nuclear pore complex protein Nup98-Nup96;Nuclear pore complex protein Nup98;Nuclear pore complex protein Nup96	Nup98	SGTFLSPSASVQECRTPRTSSRMNIPSTSPW	FASGTFLSPSAS(0.003)VQECRT(0.997)PR	FAS(-69.74)GT(-65.99)FLS(-59.42)PS(-41.6)AS(-25.17)VQECRT(25.17)PR	18	0.000335207	89.502	3	760.016	1.2514	+	0.620646	0.492076	0.387036	3	0.499919	0.117002	0.0312429	0.0946251	0.229067	0.141024	3	0.154905	0.0682876	0.21613
6384	Q58FA4	415	S	Q58FA4	S415	Transcription factor E2F8	E2f8	VKSIENDRRKISSAPSSPVKSNKAESSQNSP	ISSAPS(0.901)S(0.099)PVK	IS(-54.12)S(-42.43)APS(9.61)S(-9.61)PVK	6	5.67675e-50	168.82	2	526.755	-1.6628	+	0.301789	0.295831	0.166279	3	0.254633	0.0765747	0.150447	0.131426	0.0977431	0.17497	3	0.134713	0.0387183	0.21646
13083	Q3UYV9	21	T	Q3UYV9	T21	Nuclear cap-binding protein subunit 1	Ncbp1	HSYENDGGQPHKRRKTSDANETEDHLESLIC	T(0.83)S(0.17)DANETEDHLESLICK	T(6.88)S(-6.88)DANET(-88.56)EDHLES(-139.08)LICK	1	2.3534e-33	153.06	3	681.286	0.3337	+	0.705119	0.642178	0.874454	3	0.740584	0.12013	0.00735543	0.288859	0.0748895	0.148155	3	0.170635	0.108742	0.217303
14380	Q9WVP9	457	T	Q9WVP9	T457	Interferon-induced GTP-binding protein Mx2	Mx2	VNYKTFENIIRRQIKTLEEPAIEMLHTVTEI	T(1)LEEPAIEMLHT(1)VT(1)EIVR	T(56.45)LEEPAIEMLHT(56.45)VT(56.45)EIVR	1	0.014462	56.453	3	774.336	1.0608	+		0.65784	0.429609	2	0.543724	0.161383	0.0260963		0.167524	0.128772	2	0.148148	0.0274021	0.217303
14381	Q9WVP9	468	T	Q9WVP9	T468	Interferon-induced GTP-binding protein Mx2	Mx2	RQIKTLEEPAIEMLHTVTEIVRAAFTSVSEK	T(1)LEEPAIEMLHT(1)VT(1)EIVR	T(56.45)LEEPAIEMLHT(56.45)VT(56.45)EIVR	12	0.014462	56.453	3	774.336	1.0608	+		0.65784	0.429609	2	0.543724	0.161383	0.0260963		0.167524	0.128772	2	0.148148	0.0274021	0.217303
14382	Q9WVP9	470	T	Q9WVP9	T470	Interferon-induced GTP-binding protein Mx2	Mx2	IKTLEEPAIEMLHTVTEIVRAAFTSVSEKNF	T(1)LEEPAIEMLHT(1)VT(1)EIVR	T(56.45)LEEPAIEMLHT(56.45)VT(56.45)EIVR	14	0.014462	56.453	3	774.336	1.0608	+		0.65784	0.429609	2	0.543724	0.161383	0.0260963		0.167524	0.128772	2	0.148148	0.0274021	0.217303
956	Q689Z5;Q689Z5-2;B2RRI2	812;813;813	S	Q689Z5	S812	Protein strawberry notch homolog 1	Sbno1	IQSALLASGLGSKRPSFSSAPVISPASNSAP	RPS(0.866)FS(0.063)S(0.058)APVIS(0.004)PAS(0.002)NS(0.005)APANS(0.001)NSNSNSSLVTSQDAVER	RPS(11.35)FS(-11.35)S(-11.77)APVIS(-23.33)PAS(-26.86)NS(-22.5)APANS(-29.65)NS(-32.94)NS(-32.72)NS(-38.89)S(-41.37)LVT(-45.25)S(-47.23)QDAVER	3	0.0046579	57.801	3	1304.94	0.41587	+		0.116641	0.454248	2	0.285444	0.238724	0.172535		0.0591467	0.335678	2	0.197412	0.195537	0.21773
1116	B9EKS2;Q6ZPY7;Q6ZPY7-2	1254;1054;1054	S	B9EKS2	S1254	Lysine-specific demethylase 3B	Kdm3b	KDAGSLRSVLNKESHSPFGLDSFNSTAKVSP	ES(0.095)HS(0.905)PFGLDSFNSTAK	ES(-9.79)HS(9.79)PFGLDS(-78.53)FNS(-103.95)T(-113.29)AK	4	2.41785e-24	151.22	3	601.924	-0.54069	+	0.139501	0.27133	0.189573	3	0.200135	0.0665462	0.214618	0.118998	0.13373	0.151577	3	0.134768	0.0163143	0.218062
4824	P42128	229	S	P42128	S229	Forkhead box protein K1	Foxk1	HIPEPDLRSLVSPIPSPTGTISVPNSCPASP	S(0.5)LVS(0.5)PIPS(0.996)PT(0.003)GT(0.001)ISVPNSCPASPR	S(0)LVS(0)PIPS(25.31)PT(-25.31)GT(-31.14)IS(-41.41)VPNS(-78.86)CPAS(-86.22)PR	8	4.22608e-52	154.35	2	1291.09	-0.9407	+	0.489016	0.552717	0.36214	3	0.467958	0.0970178	0.0367501	0.0704125	0.266843	0.169245	3	0.168833	0.0982159	0.221021
7936	Q80U72-3;Q80U72-4;F6RIN9;D3YVA3	1284;1263;589;24	S	Q80U72-3	S1284	Protein scribble homolog	Scrib	GPSATTGGKTTEAPCSPGSQQTKPGVIQPLA	T(0.001)T(0.001)EAPCS(0.819)PGS(0.163)QQT(0.016)KPGVIQPLAQAWPR	T(-30.64)T(-30.64)EAPCS(7)PGS(-7)QQT(-16.98)KPGVIQPLAQAWPR	7	0.000246262	74.222	3	995.814	-1.6277	+		0.384138	0.447697	2	0.415918	0.0449427	0.0433354		0.0745605	0.228244	2	0.151402	0.10867	0.221021
4321	O89084;O89084-3	204;147	S	O89084	S204	cAMP-specific 3',5'-cyclic phosphodiesterase 4A	Pde4a	NFSLLTNVPIPSNKRSPLGGPPSVCKATLSE	SNFSLLTNVPIPS(0.1)NKRS(0.898)PLGGPPS(0.002)VCK	S(-71.96)NFS(-69.38)LLT(-55.69)NVPIPS(-9.54)NKRS(9.54)PLGGPPS(-26.99)VCK	17	1.23194e-05	103.02	4	737.378	1.4679	+	0.545505	0.345687	0.308574	3	0.399922	0.127437	0.0608164	0.0933149	0.13653	0.176265	3	0.13537	0.0414872	0.221021
2210	G5E8V9;E9Q3G5;E9QAY5;A2RSX9	132;125;11;100	S	G5E8V9	S132		Arfip1	IKNPAMEKLELVRKWSLNTYKCTRQIISEKL	KWS(1)LNTYK	KWS(53.74)LNT(-53.74)Y(-87.87)K	3	0.000585656	110.54	3	373.846	0.35753	+	0.178142	0.144979	0.180193	3	0.167771	0.0197655	0.275192	0.128363	0.100371	0.169886	3	0.132873	0.0349767	0.221021
1634	Q9D0U6;E0CYK4;E0CYF5	60;120;60	S	Q9D0U6	S60	Repressor of RNA polymerase III transcription MAF1 homolog	Maf1	KQFCQEGQPHVLEALSPPQTSGLSPSRLSKS	QFCQEGQPHVLEALS(0.998)PPQT(0.183)S(0.409)GLS(0.371)PS(0.031)RLS(0.008)K	QFCQEGQPHVLEALS(27.65)PPQT(-3.5)S(0.43)GLS(-0.43)PS(-11.24)RLS(-17.32)K	15	0.011791	62.069	4	835.387	1.297	+	-0.0195648	0.449941	0.303434	3	0.244603	0.240218	0.438551	0.0604608	0.21272	0.208323	3	0.160501	0.0866656	0.221021
5903	Q3U2G2;Q61316	415;415	S	Q3U2G2	S415	Heat shock 70 kDa protein 4	Hspa4	YPISLRWNSPAEEGLSDCEVFPKNHAAPFSK	WNSPAEEGLS(1)DCEVFPK	WNS(-137.47)PAEEGLS(137.47)DCEVFPK	10	1.36047e-157	215.89	2	1022.92	-2.1477	+	0.0121621	0.154759		2	0.0834603	0.100831	0.698636	0.114068	0.116541		2	0.115305	0.0017489	0.221021
1515	D3Z6Z7;Q8C2K5-2;Q8C2K5	165;189;187	S	D3Z6Z7	S165	RAS protein activator like-3	Rasal3	VMLGEEEGPRQIRVGSASSENSMQAALGNLK	VGS(0.948)AS(0.026)S(0.026)ENSMQAALGNLK	VGS(15.58)AS(-15.58)S(-15.58)ENS(-46.18)MQAALGNLK	3	1.02796e-290	254.79	2	922.416	-1.3993	+	0.563623	0.554973	0.455845	3	0.524814	0.0598852	0.0235571	0.0956091	0.156307	0.159875	3	0.137264	0.036118	0.222894
4555	P19096	725	S	P19096	S725	Fatty acid synthase;[Acyl-carrier-protein] S-acetyltransferase;[Acyl-carrier-protein] S-malonyltransferase;3-oxoacyl-[acyl-carrier-protein] synthase;3-oxoacyl-[acyl-carrier-protein] reductase;3-hydroxyacyl-[acyl-carrier-protein] dehydratase;Enoyl-[acyl-ca	Fasn	ARWLSTSIPEAQWQSSLARTSSAEYNVNNLV	WLSTSIPEAQWQS(0.108)S(0.892)LAR	WLS(-78.17)T(-71.42)S(-63.79)IPEAQWQS(-9.15)S(9.15)LAR	14	3.75848e-14	133.16	2	1020.48	0.80135	+	0.220657	0.263967		2	0.242312	0.0306249	0.125911	0.153545	0.0873199		2	0.120433	0.0468285	0.222894
12959	Q9EPJ9;Q9EPJ9-2;Q3TGS9	135;135;135	T	Q9EPJ9	T135	ADP-ribosylation factor GTPase-activating protein 1	Arfgap1	EGKEWSLESSPAQNWTPPQPKTLQFTAHRAS	EWSLESSPAQNWT(1)PPQPK	EWS(-81.63)LES(-75.7)S(-75.14)PAQNWT(75.14)PPQPK	13	1.25409e-15	133.25	3	721.325	1.4056	+	0.261334	0.229733	0.253498	3	0.248188	0.0164561	0.141759	0.0936326	0.160589	0.159511	3	0.137911	0.0383498	0.222894
13821	Q9D4G5;Q8K205	365;365	T	Q9D4G5	T365		Pop1	SEPVKSNICMPDPLLTPAPEDIQAGLAGDKI	SNICMPDPLLT(1)PAPEDIQAGLAGDK	S(-69.91)NICMPDPLLT(69.91)PAPEDIQAGLAGDK	11	9.24918e-19	115.01	3	901.752	1.8017	+	0.217931	0.243931	0.302335	3	0.254732	0.0432262	0.129874	0.0812726	0.113475	0.231584	3	0.142111	0.0791414	0.223713
6305	Q4VAC9;Q4VAC9-2;Q4VAC9-5	1134;1133;521	S	Q4VAC9	S1134	Pleckstrin homology domain-containing family G member 3	Plekhg3	TSKSSAAVETSPRRFSFSPSAVSPRTTSPGA	RFS(0.997)FS(0.003)PSAVSPR	RFS(25.94)FS(-25.94)PS(-80.79)AVS(-89.9)PR	3	5.65204e-05	134.4	3	473.226	0.96148	+	-0.875855	-0.829709	-1.01284	3	-0.906134	0.095245	0.00215259	-0.117139	-0.216547	-0.326725	3	-0.220137	0.104839	0.224034
9356	Q8K3X4	638	S	Q8K3X4	S638	Interferon regulatory factor 2-binding protein-like	Irf2bpl	SSVHSTTASARRNSSSPVSPASVPGQRRLAS	NS(0.002)S(0.096)S(0.902)PVSPASVPGQR	NS(-26.74)S(-9.74)S(9.74)PVS(-43)PAS(-56.29)VPGQR	4	8.07543e-05	123.54	2	775.354	0.015631	+	-0.650548		-0.783718	2	-0.717133	0.0941655	0.00292747	-0.189266		-0.337858	2	-0.263562	0.105071	0.224034
10567	Q9DAT2	191	S	Q9DAT2	S191	MRG/MORF4L-binding protein	Mrgbp	KRKRSRVTDKVLTANSNPSSPSAAKRRRT__	VLTANS(1)NPS(0.02)S(0.98)PSAAK	VLT(-60.66)ANS(41.28)NPS(-16.84)S(16.84)PS(-37.37)AAK	6	5.94871e-34	171.3	2	802.342	0.92739	+	-0.611561	-0.734993	-0.704468	3	-0.683674	0.0642896	0.00708913	-0.420945	-0.274726	-0.376668	3	-0.357446	0.0749811	0.224034
8552	Q8BTI8;Q8BTI8-3;Q8BTI8-2	1343;1343;1247	S	Q8BTI8	S1343	Serine/arginine repetitive matrix protein 2	Srrm2	MKEQSRSSRRSSSELSPEVVEKVGLFSSQKV	SSSELS(1)PEVVEK	S(-94.41)S(-89.54)S(-76.7)ELS(76.7)PEVVEK	6	7.80452e-41	179.79	2	685.808	0.23072	+	-0.667562	-0.634868	-0.707136	3	-0.669855	0.0361885	0.00945997	-0.142577	-0.175315	-0.194903	3	-0.170931	0.0264367	0.224034
2166	Q921C3;Q921C3-2;E9Q2N1	1789;1789;1789	S	Q921C3	S1789	Bromodomain and WD repeat-containing protein 1	Brwd1	SGQKLRADSISEEADSEPESSVLCKNTHLCK	LRADSISEEADS(1)EPESSVLCK	LRADS(-52.22)IS(-52.22)EEADS(52.22)EPES(-64.3)S(-67.95)VLCK	12	5.62185e-11	125.99	3	801.352	0.35972	+	-0.513258	-0.595954		2	-0.554606	0.0584746	0.0193333	-0.115744	-0.24726		2	-0.181502	0.0929963	0.224034
9313	Q8K352	97	S	Q8K352	S97	SAM and SH3 domain-containing protein 3	Sash3	RTMNRKMGKMMVKALSEEMGDTLEEGSASPT	ALS(0.971)EEMGDT(0.021)LEEGS(0.008)ASPTSPDCSLDSPGPEK	ALS(16.73)EEMGDT(-16.73)LEEGS(-20.91)AS(-35.54)PT(-49.1)S(-57.09)PDCS(-67.02)LDS(-75.97)PGPEK	3	1.63761e-09	80.733	3	1091.78	0.9084	+	-0.543892	-0.584376	-0.480869	3	-0.536379	0.0521608	0.0193333	-0.145725	-0.23171	-0.284273	3	-0.220569	0.0699427	0.224034
8589	Q8BTI8;Q8BTI8-3;Q8BTI8-2	1650;1650;1554	S	Q8BTI8	S1650	Serine/arginine repetitive matrix protein 2	Srrm2	KTKSHTPPRRRSSRSSPELTRKARVSRRSRS	S(0.001)S(0.004)RS(0.146)S(0.848)PELT(0.001)RK	S(-28.52)S(-23.52)RS(-7.65)S(7.65)PELT(-30.23)RK	5	0.0100798	98.676	2	664.322	0.44407	+	-0.50379	-0.574515		2	-0.539152	0.0500098	0.0224584	-0.163817	-0.186759		2	-0.175288	0.0162226	0.224034
13840	Q8K352	103	T	Q8K352	T103	SAM and SH3 domain-containing protein 3	Sash3	MGKMMVKALSEEMGDTLEEGSASPTSPDCSL	ALS(0.161)EEMGDT(0.806)LEEGS(0.03)AS(0.002)PTSPDCSLDSPGPEK	ALS(-7)EEMGDT(7)LEEGS(-14.26)AS(-25.73)PT(-38.08)S(-38.08)PDCS(-40.33)LDS(-43.68)PGPEK	9	1.89039e-09	72.769	3	1091.78	1.5487	+	-0.624062	-0.538982		2	-0.581522	0.0601608	0.023532	-0.247237	-0.340968		2	-0.294103	0.0662785	0.224034
1875	E9Q4Y2;E9PWW9	401;386	S	E9Q4Y2	S401		Rsf1	IPLKKREIKLSDDFDSPVKGPLCKSATPTKE	LSDDFDS(1)PVK	LS(-96.85)DDFDS(96.85)PVK	7	1.23623e-20	169.58	2	601.752	0.64952	+	-0.449588	-0.483002	-0.593375	3	-0.508655	0.0752475	0.0267725	-0.216271	-0.222457	-0.390741	3	-0.27649	0.0989926	0.224034
11745	D3Z3E0;Q8BVE8;D3Z3E4;Q8BVE8-2;F6Y765;D3Z229	110;110;110;110;92;110	T	D3Z3E0	T110	Histone-lysine N-methyltransferase NSD2	Whsc1	DTKLCFEAQEVKGIGTPPNTTPIKNGSPEIK	GIGT(1)PPNTTPIK	GIGT(52.87)PPNT(-52.87)T(-58.8)PIK	4	0.00148082	97.797	2	638.321	0.522	+	-0.472692	-0.511633	-0.444326	3	-0.476217	0.0337915	0.0267725	-0.234543	-0.224259	-0.158483	3	-0.205761	0.0412658	0.224034
9227	Q8K1K3	380	S	Q8K1K3	S380		Tinf2	TPCSSVITIGDLVLDSDEEENNQKEGKEFLK	KPVLSPTPCSSVITIGDLVLDS(1)DEEENNQK	KPVLS(-80.58)PT(-80.93)PCS(-69.32)S(-69.32)VIT(-57.1)IGDLVLDS(57.1)DEEENNQK	22	2.80826e-13	89.079	4	841.902	0.50359	+	-0.415861	-0.553976		2	-0.484918	0.0976618	0.0288546	-0.148757	-0.39141		2	-0.270083	0.171582	0.224034
5817	Q61127;Q61127-2;Q3TYF1	159;159;159	S	Q61127	S159	NGFI-A-binding protein 2	Nab2	GHGSPGEKAGSARSFSPKSPLELGEKLSPLP	S(0.015)FS(0.92)PKS(0.065)PLELGEK	S(-17.86)FS(11.54)PKS(-11.54)PLELGEK	3	0.00984617	74.726	3	500.244	-0.042047	+	-0.475604	-0.450874	-0.492732	3	-0.47307	0.0210439	0.0289377	-0.10799	-0.163543	-0.279188	3	-0.183573	0.087339	0.224034
3764	Q80YV2;H3BKM2;Q80YV2-2	334;292;334	S	Q80YV2	S334	Nuclear-interacting partner of ALK	Zc3hc1	ESPRRMMTRSQDATVSPGSEQSEKSPGPIVS	SQDATVS(1)PGSEQSEK	S(-124.88)QDAT(-67.56)VS(36.78)PGS(-36.78)EQS(-78.88)EK	7	0	290.67	2	815.336	-0.58777	+	-0.427861	-0.413334	-0.528454	3	-0.456549	0.0626932	0.032844	-0.217852	-0.226104	-0.312791	3	-0.252249	0.0525928	0.224034
6189	Q3UZA1;Q3UZA1-2	120;90	S	Q3UZA1	S120	CapZ-interacting protein	Rcsd1	SPKSPGLKAIVSPFHSPPSTPSSPGIRSHPS	AIVSPFHS(1)PPSTPSSPGIR	AIVS(-59.11)PFHS(46.43)PPS(-46.43)T(-51.3)PS(-78.53)S(-84.34)PGIR	8	5.12695e-141	210.46	3	671.998	-1.0076	+	-0.639255	-0.356153	-0.65328	3	-0.549563	0.167645	0.032844	-0.264676	-0.191539	-0.1358	3	-0.197339	0.0646334	0.224034
7386	Q6P3Y5;Q6P3Y5-2;Q6P3Y5-3	532;532;523	S	Q6P3Y5	S532	Zinc finger protein 280C	Znf280c	VIIRASLGSSQSRASSPPSSTIPSTSLQLSV	AS(0.105)LGS(0.341)S(0.387)QS(0.171)RAS(0.227)S(0.755)PPS(0.008)S(0.004)T(0.002)IPSTSLQLSVPK	AS(-5.73)LGS(-0.57)S(0.57)QS(-3.69)RAS(-5.32)S(5.32)PPS(-20.08)S(-23.87)T(-27.54)IPS(-39.02)T(-39.02)S(-38.38)LQLS(-44.23)VPK	12	1.88787e-11	127.3	3	1006.48	1.3936	+	-0.481289	-0.470377		2	-0.475833	0.00771561	0.032844	-0.126229	-0.238644		2	-0.182436	0.0794892	0.224034
14251	Q9EQN3;Q3U1U6	167;167	T	Q9EQN3	T167	TSC22 domain family protein 4	Tsc22d4	LRPPPTSPGPQARSFTGGLGQLAGPGKAKVE	S(0.097)FT(0.903)GGLGQLAGPGK	S(-9.7)FT(9.7)GGLGQLAGPGK	3	0.000215261	107.17	3	457.222	0.51375	+	-0.48979	-0.548121	-0.344451	3	-0.460788	0.104887	0.032844	-0.26444	-0.365039	-0.242019	3	-0.2905	0.0655195	0.224034
11961	E9Q3G8	695	T	E9Q3G8	T695		Nup153	AKLPLKETAKQTGTGTPSKSDKPASTSGTGF	QT(0.003)GT(0.074)GT(0.828)PS(0.074)KS(0.02)DKPASTSGTGFGDK	QT(-24.48)GT(-10.46)GT(10.46)PS(-10.46)KS(-16.23)DKPAS(-47.33)T(-50.53)S(-50.53)GT(-56.51)GFGDK	6	0.00244165	84.156	4	598.772	-0.13099	+	-0.540743	-0.408301	-0.473399	3	-0.474148	0.0662242	0.032844	-0.248464	-0.161529	-0.302201	3	-0.237398	0.070986	0.224034
13092	Q3V300	458	T	Q3V300	T458	Kinesin-like protein KIF22	Kif22	RLLGSQGSQGTPLLNTPKRERMVLMKTVEEK	LLGSQGSQGTPLLNT(1)PKRER	LLGS(-69.02)QGS(-64.84)QGT(-38.1)PLLNT(38.1)PKRER	15	0.000346944	102.29	4	558.793	1.4963	+	-0.412042	-0.411695	-0.559548	3	-0.461095	0.0852628	0.032844	-0.17528	-0.146344	-0.300791	3	-0.207472	0.0821017	0.224034
10732	Q9EQN3;Q3U1U6	165;165	S	Q9EQN3	S165	TSC22 domain family protein 4	Tsc22d4	SWLRPPPTSPGPQARSFTGGLGQLAGPGKAK	S(0.998)FT(0.002)GGLGQLAGPGK	S(28.14)FT(-28.14)GGLGQLAGPGK	1	4.04285e-19	153.68	2	685.329	-0.65453	+	-0.460284	-0.525434	-0.34329	3	-0.443003	0.0922934	0.033712	-0.208576	-0.343069	-0.18472	3	-0.245455	0.0853734	0.224034
1126	B9EKS2;Q6ZPY7;Q6ZPY7-2	557;357;357	S	B9EKS2	S557	Lysine-specific demethylase 3B	Kdm3b	SRVSESVADDSSSRDSFTQSLESLTSGLCKG	VSESVADDS(0.353)S(0.353)S(0.296)RDS(0.946)FT(0.041)QS(0.01)LES(0.001)LTSGLCK	VS(-39.27)ES(-33.13)VADDS(0)S(0)S(-0.77)RDS(13.7)FT(-13.7)QS(-19.66)LES(-31.29)LT(-42.5)S(-47.92)GLCK	14	1.68662e-17	110.03	3	1051.44	-0.86498	+	-0.398886	-0.492225		2	-0.445555	0.0660009	0.0346311	-0.111464	-0.347473		2	-0.229469	0.166884	0.224034
11007	Q9QY06;Q9QY06-2;Q9QY06-3	1332;1361;1332	S	Q9QY06	S1332	Unconventional myosin-IXb	Myo9b	TPTEERRISFSTSDISKLSPVKTSAEIDGDF	RISFS(0.005)T(0.005)S(0.005)DIS(0.986)K	RIS(-40.25)FS(-23.37)T(-23.37)S(-23.37)DIS(23.37)K	10	0.000688283	96.591	2	660.813	0.88614	+	-0.511731	-0.504942	-0.321868	3	-0.44618	0.107711	0.0346311	-0.24	-0.245155	-0.200358	3	-0.228504	0.0245113	0.224034
1836	E9PVX6	751	S	E9PVX6	S751		Mki67	IPEPITTEILGEKVLSSTRNAAKQQSDRYSA	VLS(0.994)S(0.006)TRNAAK	VLS(22.32)S(-22.32)T(-40.97)RNAAK	3	0.0010564	108.68	2	563.784	-0.79537	+	-0.368485	-0.424154	-0.575303	3	-0.455981	0.107019	0.0346311	-0.137386	-0.168969	-0.482916	3	-0.26309	0.191029	0.224034
13801	Q8CJF7	1954	T	Q8CJF7	T1954	Protein ELYS	Ahctf1	DSSQLPLQTGLDVPATPRKRGRPRKVVPLEA	EVSVSSVTEEPKLDSSQLPLQTGLDVPAT(1)PRK	EVS(-59.59)VS(-57.94)S(-58.03)VT(-58.11)EEPKLDS(-50.86)S(-48.9)QLPLQT(-35.22)GLDVPAT(35.22)PRK	29	0.0167857	69.652	4	872.695	-0.0084884	+	-0.40179	-0.475461		2	-0.438625	0.0520936	0.0346311	-0.15238	-0.31572		2	-0.23405	0.115499	0.224034
10937	Q9JKB3;Q9JKB3-2	52;52	S	Q9JKB3	S52	Y-box-binding protein 3	Ybx3	SGAPQAPAPAALLAGSPGGDAAPGPAPASSA	SPAASGAPQAPAPAALLAGS(1)PGGDAAPGPAPASSAPAGGEDAEK	S(-91.71)PAAS(-88.23)GAPQAPAPAALLAGS(43.54)PGGDAAPGPAPAS(-43.54)S(-48.49)APAGGEDAEK	20	8.69706e-74	118.85	3	1281.6	-0.2844	+	-0.428734	-0.391581	-0.450188	3	-0.423501	0.0296517	0.0351191	-0.21272	-0.156126	-0.151676	3	-0.173507	0.034032	0.224034
4933	P48972	404	S	P48972	S404	Myb-related protein B	Mybl2	RGELIPISPSTEFGGSGIGTPPSVLKRQKKR	S(0.001)S(0.001)RGELIPIS(0.555)PS(0.227)T(0.227)EFGGS(0.943)GIGT(0.041)PPS(0.005)VLK	S(-31.15)S(-30.78)RGELIPIS(3.99)PS(-3.99)T(-3.99)EFGGS(13.93)GIGT(-13.93)PPS(-24.89)VLK	18	0.000255749	83.317	3	977.47	0.78639	+		-0.461665	-0.425192	2	-0.443428	0.0257906	0.0351191		-0.174632	-0.205881	2	-0.190257	0.022096	0.224034
7719	Q78WZ7	325	S	Q78WZ7	S325	DNA-directed RNA polymerase I subunit RPA43	Twistnb	KKKKKRKHSEEANFESPKKRQ__________	HSEEANFES(1)PK	HS(-83.83)EEANFES(83.83)PK	9	2.87854e-07	138.21	3	452.182	-1.5043	+	-0.440034	-0.363723	-0.478581	3	-0.427446	0.0584546	0.0378631	-0.136721	-0.266137	-0.139249	3	-0.180702	0.0739994	0.224034
11468	Q61792;A2A6G6;A2A6G7;A2A6G8;A2A6G9;A2A6H0;A2A6G4;A2A6G5;E9Q0N6	68;32;32;32;32;32;32;32;32	T	Q61792	T68	LIM and SH3 domain protein 1	Lasp1	CNAHYPKQSFTMVADTPENLRLKQQSELQSQ	QSFTMVADT(1)PENLRLK	QS(-58.33)FT(-51.19)MVADT(51.19)PENLRLK	9	0.0155759	82.189	3	643.976	-1.8036	+	-0.321045	-0.627125		2	-0.474085	0.216431	0.0404921	-0.0999222	-0.389606		2	-0.244764	0.204837	0.224034
11947	E9Q2I4	707	T	E9Q2I4	T707		Elmsan1	SSEVTPPVLSVMGEATPVSIEPRINVGTRFQ	SNSSEVTPPVLS(0.003)VMGEAT(0.975)PVS(0.022)IEPR	S(-63)NS(-63)S(-58.09)EVT(-53.65)PPVLS(-25.04)VMGEAT(16.53)PVS(-16.53)IEPR	18	3.55008e-11	92.956	2	1332.14	-0.5069	+	-0.683359	-0.381617		2	-0.532488	0.213364	0.0404921	-0.405927	-0.149458		2	-0.277692	0.181351	0.224034
12583	P09405	84	T	P09405	T84	Nucleolin	Ncl	TKKAAVPTPAKKAAVTPGKKAVATPAKKNIT	AAVT(1)PGKK	AAVT(108.43)PGKK	4	0.00418467	108.9	2	426.223	-2.0691	+	-0.44098	-0.358843	-0.41283	3	-0.404218	0.0417399	0.0418282	-0.153937	-0.198151	-0.2766	3	-0.209562	0.0621226	0.224034
12588	P09405	106	T	P09405	T106	Nucleolin	Ncl	ATPAKKNITPAKVIPTPGKKGAAQAKALVPT	VIPT(1)PGKK	VIPT(57.79)PGKK	4	0.000351066	118.37	3	307.172	-1.2806	+	-0.412749	-0.373198	-0.386802	3	-0.390916	0.0200942	0.0431655	-0.1825	-0.221718	-0.184294	3	-0.196171	0.0221431	0.224034
14352	Q9WTU0	901	T	Q9WTU0	T901	Lysine-specific demethylase PHF2	Phf2	RSKKRKGSDDAPYSPTARVGPSVPRQDRPVR	GSDDAPY(0.001)S(0.034)PT(0.965)AR	GS(-79.56)DDAPY(-31.81)S(-14.51)PT(14.51)AR	10	0.00565423	88.108	2	658.761	-1.8217	+		-0.461162	-0.362746	2	-0.411954	0.0695907	0.0431655		-0.367755	-0.208253	2	-0.288004	0.112785	0.224034
14030	Q99J45;F7AZ06	232;217	T	Q99J45	T232	Nuclear receptor-binding protein	Nrbp1	KIGSVAPDTINNHVKTCREEQKNLHFFAPEY	IGSVAPDTINNHVKT(1)CREEQK	IGS(-53.15)VAPDT(-43.39)INNHVKT(43.39)CREEQK	15	0.00767574	74.793	4	619.797	-2.9902	+	-0.367958	-0.443601		2	-0.405779	0.0534877	0.0432674	-0.235099	-0.496114		2	-0.365607	0.184566	0.224034
11844	E9PVX6	2283	T	E9PVX6	T2283		Mki67	SQPLEDLDGFQELFQTPAGASNPVSVEESAK	NRSQPLEDLDGFQELFQT(1)PAGASNPVSVEESAK	NRS(-44.34)QPLEDLDGFQELFQT(35.47)PAGAS(-35.47)NPVS(-39.58)VEES(-54.56)AK	18	4.91768e-39	111.03	3	1214.23	2.1693	+	-0.394092	-0.388457	-0.375078	3	-0.385876	0.00976624	0.0432674	-0.214791	-0.180897	-0.18673	3	-0.194139	0.0181209	0.224034
14255	Q9ERH4;Q9ERH4-2	323;290	T	Q9ERH4	T323	Nucleolar and spindle-associated protein 1	Nusap1	TPKSKATERTSIAVITPFKLMTEATQTPSSS	TSIAVIT(1)PFK	T(-85.63)S(-80.65)IAVIT(80.65)PFK	7	0.000159724	139.19	2	578.804	-0.053606	+	-0.412603	-0.354028	-0.389077	3	-0.385236	0.0294761	0.0443019	-0.173186	-0.217814	-0.128625	3	-0.173209	0.0445944	0.224034
4723	P33174	1002	S	P33174	S1002	Chromosome-associated kinesin KIF4	Kif4	ENSAIKQKLTLLQVASKQKPHLTRNIFQSPD	QKLTLLQVAS(1)K	QKLT(-93.96)LLQVAS(93.96)K	10	0.000239718	134.68	3	436.914	2.3579	+	-0.417119	-0.330506	-0.455591	3	-0.401072	0.0640676	0.0443019	-0.197308	-0.159035	-0.248341	3	-0.201561	0.0448048	0.224034
14231	Q9DCL9;D3Z6P1;D6RCU8	27;27;27	T	Q9DCL9	T27	Multifunctional protein ADE2;Phosphoribosylaminoimidazole-succinocarboxamide synthase;Phosphoribosylaminoimidazole carboxylase	Paics	KLYEGKTKEVYELLDTPGRVLLQSKDQITAG	TKEVYELLDT(1)PGRVLLQSK	T(-57.4)KEVY(-64.13)ELLDT(57.4)PGRVLLQS(-66.18)K	10	5.06869e-05	115.04	4	568.051	-0.64937	+	-0.381973	-0.37951	-0.369513	3	-0.376999	0.00659881	0.0458814	-0.143358	-0.243455	-0.109815	3	-0.165543	0.0695274	0.224034
13548	Q80YR7;F6S522	821;310	T	Q80YR7	T821	Claspin	Clspn	LSEPSLPVEDSQDLYTASPEPKTLFLGAGDF	LSEPSLPVEDSQDLYT(0.961)AS(0.039)PEPK	LS(-111.37)EPS(-100.05)LPVEDS(-39.53)QDLY(-40.77)T(13.95)AS(-13.95)PEPK	16	2.92398e-175	221.21	2	1241.57	0.69193	+	-0.415669	-0.341655	-0.379614	3	-0.378979	0.0370111	0.0458814	-0.170643	-0.179943	-0.163906	3	-0.171498	0.00805241	0.224034
8097	Q80Y19	840	S	Q80Y19	S840	Rho GTPase-activating protein 11A	Arhgap11a	RQPVRQKLAIFGDAASPLVKSVSCDSALPSC	LAIFGDAAS(1)PLVK	LAIFGDAAS(97.45)PLVK	9	1.83418e-32	170.48	3	461.242	0.57949	+	-0.369247	-0.341979	-0.447577	3	-0.386267	0.0548178	0.0458814	-0.158664	-0.250318	-0.204717	3	-0.204566	0.0458271	0.224034
9903	Q922M7	189	S	Q922M7	S189	Ashwin		NHDLMNRKSPSGPVKSPPLSPVGTTPVKLKR	SPSGPVKS(1)PPLS(0.971)PVGT(0.024)T(0.005)PVK	S(-47.23)PS(-40.1)GPVKS(40.1)PPLS(16.13)PVGT(-16.13)T(-22.51)PVK	8	2.40132e-05	117.2	3	698.009	-0.90158	+	-0.356064	-0.36178	-0.428556	3	-0.382133	0.0403045	0.0458814	-0.199316	-0.19185	-0.193737	3	-0.194968	0.00388245	0.224034
11829	E9PVX6	981	T	E9PVX6	T981		Mki67	AQPLEGPAGLKEHFETPNPKDKPITEDRTRV	EHFET(1)PNPK	EHFET(80.74)PNPK	5	0.00423086	84.31	3	393.501	-0.45652	+	-0.363322	-0.384323	-0.400175	3	-0.382607	0.0184867	0.0458814	-0.119948	-0.196038	-0.252416	3	-0.189467	0.0664778	0.224034
12582	P09405	76	T	P09405	T76	Nucleolin	Ncl	AKKVVVSQTKKAAVPTPAKKAAVTPGKKAVA	KAAVPT(1)PAKK	KAAVPT(97.2)PAKK	6	0.0027332	107.09	2	545.805	-0.76623	+	-0.382905	-0.351425	-0.399189	3	-0.37784	0.0242814	0.0458814	-0.187154	-0.218087	-0.207742	3	-0.204328	0.0157465	0.224034
1775	E9PVX6	1100	S	E9PVX6	S1100		Mki67	AQPLEDLTCFQELFISPVPTNIIKKIPSKSP	KAQPLEDLTCFQELFIS(1)PVPTNIIK	KAQPLEDLT(-96.46)CFQELFIS(55.63)PVPT(-55.63)NIIK	17	4.15838e-84	166.22	4	746.133	-0.21435	+	-0.36203	-0.370968	-0.388492	3	-0.37383	0.0134611	0.0459126	-0.102125	-0.248175	-0.206475	3	-0.185591	0.0752311	0.224034
6299	Q4VA53;Q4VA53-3;F8WHU5;Q4VA53-2	1140;1140;1140;611	S	Q4VA53	S1140	Sister chromatid cohesion protein PDS5 homolog B	Pds5b	PKTANVLGAVNKPLSSAGKQSQTKSSRMETV	TANVLGAVNKPLS(0.098)S(0.902)AGK	T(-79.24)ANVLGAVNKPLS(-9.62)S(9.62)AGK	14	0.00194928	86.189	3	569.633	0.29991	+	-0.413176	-0.314169	-0.408443	3	-0.378596	0.055846	0.0466121	-0.232437	-0.163043	-0.157608	3	-0.184363	0.0417222	0.224034
7861	Q7TSZ8	187	S	Q7TSZ8	S187	Nucleus accumbens-associated protein 1	Nacc1	LDSVQCTPMAKRLWDSSQKEAGGSGGNNGSR	RLWDS(0.975)S(0.025)QK	RLWDS(15.97)S(-15.97)QK	5	0.00243891	89.171	3	367.169	0.97746	+	-0.397538	-0.318985	-0.425322	3	-0.380615	0.0551516	0.0466121	-0.290747	-0.206286	-0.212294	3	-0.236442	0.0471247	0.224034
11845	E9PVX6	1896	T	E9PVX6	T1896		Mki67	IMETPKQKLDFIGNSTGHKRRPRTPKNRAQP	QKLDFIGNS(1)T(1)GHK	QKLDFIGNS(76.34)T(76.34)GHK	10	0.00230474	86.016	3	535.567	-0.56288	+	-0.328642	-0.39392	-0.383097	3	-0.368553	0.0349849	0.0466121	-0.183498	-0.222878	-0.207877	3	-0.204751	0.0198753	0.224034
1791	E9PVX6	162	S	E9PVX6	S162		Mki67	ASRRSFVYAKGLSADSPASDGSKNSVSQDSS	GLSADS(1)PASDGSK	GLS(-94.58)ADS(67.77)PAS(-67.77)DGS(-101.61)K	6	4.35183e-205	244.18	2	636.261	1.6004	+	-0.318216	-0.380406	-0.400952	3	-0.366525	0.0430793	0.0470471	-0.145569	-0.240831	-0.207338	3	-0.197913	0.0483252	0.224034
1798	E9PVX6	1246	S	E9PVX6	S1246		Mki67	ISLESSQAEPVKTPASTKRRSKMSLMKVDMK	ISLESSQAEPVKT(0.999)PAS(0.818)T(0.183)K	IS(-57.77)LES(-47.41)S(-47.41)QAEPVKT(28.54)PAS(6.53)T(-6.53)K	16	6.48028e-05	117.07	3	678.313	-0.30525	+	-0.382151	-0.323343	-0.404509	3	-0.370001	0.0419248	0.0470471	-0.169292	-0.165993	-0.1782	3	-0.171162	0.00631449	0.224034
11835	E9PVX6	1243	T	E9PVX6	T1243		Mki67	SAKISLESSQAEPVKTPASTKRRSKMSLMKV	ISLESSQAEPVKT(0.999)PAS(0.818)T(0.183)K	IS(-57.77)LES(-47.41)S(-47.41)QAEPVKT(28.54)PAS(6.53)T(-6.53)K	13	6.48028e-05	117.07	3	678.313	-0.30525	+	-0.382151	-0.323343	-0.404509	3	-0.370001	0.0419248	0.0470471	-0.169292	-0.165993	-0.1782	3	-0.171162	0.00631449	0.224034
11997	E9Q5C9	357	T	E9Q5C9	T357		Nolc1	SEEEKKPPAKTVVSKTPAKAAPVKKKAESSS	TVVSKT(1)PAK	T(-47.5)VVS(-43.66)KT(43.66)PAK	6	0.000585526	136.01	2	505.768	-0.30354	+	-0.318777	-0.354568	-0.487011	3	-0.386785	0.0886237	0.0470471	-0.172661	-0.187314	-0.234365	3	-0.198114	0.0322385	0.224034
12584	P09405	121	T	P09405	T121	Nucleolin	Ncl	TPGKKGAAQAKALVPTPGKKGAATPAKGAKN	ALVPT(1)PGKK	ALVPT(72.53)PGKK	5	0.00143816	115.33	2	495.773	0.73301	+	-0.367391	-0.352666	-0.367375	3	-0.362477	0.00849674	0.0470471	-0.145383	-0.20155	-0.229912	3	-0.192282	0.04302	0.224034
13088	Q3UZA1;Q3UZA1-2	256;226	T	Q3UZA1	T256	CapZ-interacting protein	Rcsd1	RNTCNSTEKPEELVRTPEEANAGEKVGQNPD	NTCNSTEKPEELVRT(1)PEEANAGEK	NT(-67.32)CNS(-61.57)T(-62.19)EKPEELVRT(61.57)PEEANAGEK	15	2.33015e-07	109.23	3	928.411	-1.6662	+	-0.407268	-0.354676	-0.314457	3	-0.3588	0.0465428	0.0472658	-0.253241	-0.207426	-0.113409	3	-0.191359	0.0712875	0.224034
8641	Q8BVY0	326	S	Q8BVY0	S326		Rsl1d1	SLLTQSGLASSAPAKSPGAQKKKTNKAHKKQ	KATSLLTQSGLASSAPAKS(1)PGAQK	KAT(-113.47)S(-113.2)LLT(-107.49)QS(-101.46)GLAS(-73.47)S(-57.79)APAKS(57.79)PGAQK	19	4.49419e-35	164.35	3	793.747	1.7691	+	-0.395493	-0.311678	-0.384962	3	-0.364045	0.0456553	0.0478236	-0.193876	-0.182349	-0.21606	3	-0.197428	0.0171343	0.224034
13661	Q8BVY0	397	T	Q8BVY0	T397		Rsl1d1	DPSTPKGKKRKALLATETPEASAPGTSGKKQ	ALLAT(0.977)ET(0.023)PEASAPGTSGKK	ALLAT(16.33)ET(-16.33)PEAS(-69.48)APGT(-108.08)S(-112.43)GKK	5	3.17706e-86	188.27	3	636.982	-2.776	+	-0.337308	-0.354411	-0.378234	3	-0.356651	0.0205548	0.0478236	-0.127267	-0.200033	-0.158061	3	-0.161787	0.0365257	0.224034
7136	Q68FE6	748	S	Q68FE6	S748	Protein FAM65A	Fam65a	LASSGSKPLTSPAPDSPEQIPKSPSSSPSSS	ADPTASCTSYQSLASSGSKPLTSPAPDS(0.999)PEQIPK	ADPT(-58.75)AS(-58.15)CT(-56.45)S(-52.41)Y(-52.57)QS(-52.57)LAS(-45.69)S(-42.05)GS(-38.72)KPLT(-35.23)S(-35.23)PAPDS(35.23)PEQIPK	28	0.000444387	66.828	3	1185.88	-0.87306	+	-0.411	-0.323197	-0.34848	3	-0.360892	0.0451987	0.0480049	-0.257391	-0.193393	-0.185287	3	-0.212023	0.0394975	0.224034
14305	Q9JL35	29	T	Q9JL35	T29	High mobility group nucleosome-binding domain-containing protein 5	Hmgn5	PKRRSARLSAMPVPFTPELKPKRASTSRKTK	LSAMPVPFT(1)PELKPK	LS(-85.63)AMPVPFT(85.63)PELKPK	9	2.77405e-05	130.95	3	578.968	-0.35358	+	-0.366855	-0.340065	-0.363029	3	-0.356649	0.0144896	0.0480049	-0.150695	-0.218037	-0.178488	3	-0.182406	0.0338413	0.224034
2229	E9Q3G8	527	S	E9Q3G8	S527		Nup153	MTSLGSTGSPVFTFSSPIVKSTQAAVLPPAS	VQMTSLGSTGSPVFTFS(0.01)S(0.99)PIVK	VQMT(-82.38)S(-80.09)LGS(-79.56)T(-81.9)GS(-84.07)PVFT(-43.02)FS(-19.9)S(19.9)PIVK	18	1.95165e-125	197.07	3	784.052	1.3779	+	-0.388957	-0.318596	-0.353147	3	-0.353566	0.0351823	0.0488345	-0.144232	-0.140046	-0.177103	3	-0.153794	0.0202952	0.224034
11218	Q9Z0R0	401	S	Q9Z0R0	S401	Serine/threonine-protein kinase haspin	Gsg2	AHLTVSSRCSSVYLLSPLKTLHVTDQRPSYA	CSSVYLLS(1)PLK	CS(-67.09)S(-66.62)VY(-55.24)LLS(55.24)PLK	8	0.000812004	86.756	3	449.552	-1.6089	+	-0.286736	-0.413379	-0.356179	3	-0.352098	0.0634199	0.0488345	-0.104351	-0.363031	-0.136847	3	-0.20141	0.140908	0.224034
13779	Q8CH77;Q8CH77-3;Q8CH77-2;Q8CH77-4	650;650;650;256	T	Q8CH77	T650	Neuron navigator 1	Nav1	QKSSGIPVKPVNGRKTSLDVSNSVEPGFLAP	KT(0.993)S(0.007)LDVSNSVEPGFLAPGAR	KT(21.27)S(-21.27)LDVS(-54.05)NS(-66.83)VEPGFLAPGAR	2	1.24304e-09	132.9	3	709.016	2.0501	+		-0.343633	-0.401142	2	-0.372388	0.0406647	0.0491442		-0.198541	-0.263636	2	-0.231089	0.0460289	0.224034
2238	E9Q3P4;F6V6F0	2907;61	S	E9Q3P4	S2907		Cenpf	TRTSPRFATQKLVGSSPSLGKENVVESSKPT	LVGS(0.024)S(0.972)PS(0.004)LGK	LVGS(-16.03)S(16.03)PS(-23.91)LGK	5	7.26371e-05	140.63	2	512.757	0.48443	+	-0.388415	-0.313587	-0.352684	3	-0.351562	0.0374264	0.0502452	-0.148603	-0.196659	-0.186448	3	-0.177236	0.0253178	0.224034
8099	Q80Y19;A2AL19	481;481	S	Q80Y19	S481	Rho GTPase-activating protein 11A	Arhgap11a	NLKSRIDSVKTGLLFSPDIDERLLKKGSEKI	TGLLFS(1)PDIDERLLK	T(-42.44)GLLFS(42.44)PDIDERLLK	6	5.53074e-05	123.08	3	599.645	-0.70644	+	-0.322119	-0.320636	-0.439522	3	-0.360759	0.0682149	0.0504899	-0.128302	-0.18407	-0.26503	3	-0.192468	0.0687496	0.224034
5667	Q14B71;D3YZE8;Q14B71-2;D3Z5P7	210;210;210;210	S	Q14B71	S210	Cell division cycle-associated protein 2	Cdca2	PVNSSSKRRRISSQDSPDNYLSGTKALADEA	ISSQDS(1)PDNYLSGTK	IS(-100.37)S(-80.27)QDS(80.27)PDNY(-164.87)LS(-87.06)GT(-106.92)K	6	1.03685e-292	260.24	2	846.362	-0.6976	+	-0.326426	-0.319918	-0.389715	3	-0.345353	0.0385561	0.0506871	-0.132196	-0.190393	-0.13389	3	-0.15216	0.0331221	0.224034
10505	Q9D6Z1;A2APD7	567;283	S	Q9D6Z1	S567	Nucleolar protein 56	Nop56	KFSEEPEVAANFTKSSTKKKKKSQKAQED__	FSEEPEVAANFTKS(0.004)S(0.832)T(0.164)K	FS(-86.14)EEPEVAANFT(-56.68)KS(-23.27)S(7.05)T(-7.05)K	15	6.36208e-05	113.73	3	651.294	0.30841	+	-0.326463	-0.303443	-0.465442	3	-0.365116	0.0876442	0.0506871	-0.178545	-0.189149	-0.329805	3	-0.2325	0.084435	0.224034
11702	Q9D6T0;D3YV75;Q9D6T0-2	168;195;168	T	Q9D6T0	T168	Nitric oxide synthase-interacting protein	Nosip	KDKDKALPSFWIPSLTPEAKATKLEKPSRTV	ALPSFWIPSLT(1)PEAK	ALPS(-131.8)FWIPS(-45.94)LT(45.94)PEAK	11	1.12686e-142	204.78	3	579.627	0.1314	+	-0.359817	-0.317665	-0.350849	3	-0.342777	0.0222047	0.0506871	-0.143046	-0.215618	-0.205394	3	-0.188019	0.0392821	0.224034
1778	E9PVX6	1446	S	E9PVX6	S1446		Mki67	RKQSRTPKDITGFQDSFQIPDHANGPLVVVK	DIT(0.145)GFQDS(0.855)FQIPDHANGPLVVVK	DIT(-7.72)GFQDS(7.72)FQIPDHANGPLVVVK	8	3.46749e-05	73.519	3	859.751	0.47863	+	-0.433669		-0.206691	2	-0.32018	0.160497	0.0506871	-0.292854		-0.0700379	2	-0.181446	0.157555	0.224034
1823	E9PVX6	591	S	E9PVX6	S591		Mki67	HGILQMICSKRRSGASEANLIVAKSWADVVK	RRS(0.005)GAS(0.995)EANLIVAK	RRS(-23.43)GAS(23.43)EANLIVAK	6	5.98622e-05	143.31	3	517.938	-0.59277	+	-0.327219	-0.335433	-0.371567	3	-0.34474	0.0235931	0.0506871	-0.131362	-0.136469	-0.302374	3	-0.190068	0.0972932	0.224034
6957	Q62165	812	S	Q62165	S812	Dystroglycan;Alpha-dystroglycan;Beta-dystroglycan	Dag1	IFADELDDSKPPPSSSMPLILQEEKAPLPPP	GVPIIFADELDDSKPPPS(0.042)S(0.18)S(0.778)MPLILQEEK	GVPIIFADELDDS(-38.07)KPPPS(-12.64)S(-6.36)S(6.36)MPLILQEEK	20	1.37546e-19	112.48	4	808.899	-0.21612	+	-0.27448	-0.490529		2	-0.382505	0.152769	0.0506871	-0.160228	-0.471456		2	-0.315842	0.220071	0.224034
7790	Q7TPV4	1303	S	Q7TPV4	S1303	Myb-binding protein 1A	Mybbp1a	KHHQEALSTKEVIRKSPHPQSALPKKRARLS	S(1)PHPQSALPK	S(67.32)PHPQS(-67.32)ALPK	1	0.00105365	104.88	3	381.185	0.042361	+	-0.359439	-0.300353	-0.369179	3	-0.34299	0.0372447	0.0506871	-0.123558	-0.180186	-0.179466	3	-0.16107	0.0324885	0.224034
12586	P09405	92	T	P09405	T92	Nucleolin	Ncl	PAKKAAVTPGKKAVATPAKKNITPAKVIPTP	AVAT(1)PAKK	AVAT(87.57)PAKK	4	0.00323335	112.83	2	433.231	-0.37422	+	-0.344727	-0.338774	-0.308351	3	-0.330617	0.0195117	0.0506871	-0.116309	-0.167236	-0.220213	3	-0.167919	0.0519553	0.224034
13254	Q61846	382	T	Q61846	T382	Maternal embryonic leucine zipper kinase	Melk	LIDYELCEDKLLAPKTPQVTKHLAESNHAAS	LLAPKT(1)PQVTK	LLAPKT(41.52)PQVT(-41.52)K	6	0.00312208	89.507	3	425.907	0.37449	+	-0.300067	-0.333211	-0.399795	3	-0.344357	0.0507898	0.0506871	-0.0986437	-0.258415	-0.201779	3	-0.186279	0.0810056	0.224034
13430	Q6ZQF0	851	T	Q6ZQF0	T851	DNA topoisomerase 2-binding protein 1	Topbp1	FKPSFDVTDALAALETPNAASQKRKLSSPLS	LFKPSFDVTDALAALET(0.991)PNAAS(0.009)QK	LFKPS(-69.33)FDVT(-55.46)DALAALET(20.4)PNAAS(-20.4)QK	17	1.90262e-05	88	4	654.325	-0.40236	+	-0.388797	-0.328485		2	-0.358641	0.0426475	0.0506871	-0.262807	-0.225636		2	-0.244222	0.0262836	0.224034
13663	Q8BVY0	407	T	Q8BVY0	T407		Rsl1d1	KALLATETPEASAPGTSGKKQKKDVQEFRKP	ALLAT(0.97)ET(0.029)PEAS(0.001)APGT(0.969)S(0.031)GKK	ALLAT(15.2)ET(-15.2)PEAS(-32.44)APGT(15.02)S(-15.02)GKK	15	1.15832e-09	138.03	3	663.637	0.80377	+	-0.322932	-0.309512	-0.476194	3	-0.369546	0.0926034	0.0506871	-0.306897	-0.110872	-0.411838	3	-0.276536	0.152763	0.224034
11840	E9PVX6	701	T	E9PVX6	T701		Mki67	VDFSEDLSGLTEMFKTPVKEKQQQMSDTGSV	VDFSEDLSGLTEMFKT(1)PVK	VDFS(-93.38)EDLS(-82.06)GLT(-54.36)EMFKT(54.36)PVK	16	7.81281e-06	116.87	4	556.513	-0.38233	+	-0.368861	-0.312578	-0.31798	3	-0.33314	0.0310532	0.0509588	-0.150726	-0.244072	-0.0899404	3	-0.161579	0.0776368	0.224034
11562	A2APB8	369	T	A2APB8	T369	Targeting protein for Xklp2	Tpx2	LLPSKSVNKIARDPQTPILQTKYRTRAVTCK	IARDPQT(1)PILQTK	IARDPQT(67.96)PILQT(-67.96)K	7	1.85326e-05	145.69	3	520.943	-0.024016	+	-0.339267	-0.308317	-0.347447	3	-0.331677	0.0206395	0.0521382	-0.143265	-0.138466	-0.214844	3	-0.165525	0.042779	0.224034
14265	Q9ERU9	1990	T	Q9ERU9	T1990	E3 SUMO-protein ligase RanBP2;Putative peptidyl-prolyl cis-trans isomerase	Ranbp2	KFEECQRLLLDIPLQTPHKLVDTGRAAKLIQ	LLLDIPLQT(1)PHK	LLLDIPLQT(85.29)PHK	9	0.000308187	98.654	3	489.937	-0.0034633	+	-0.360374	-0.281108	-0.371345	3	-0.337609	0.0492377	0.0529424	-0.179351	-0.214236	-0.0945759	3	-0.162721	0.061539	0.224034
12033	E9Q7G0;F6ZQA3	2084;731	T	E9Q7G0	T2084		Numa1	SPRIATTTTGTATVATTPRAKGKVKH_____	IATTTTGTATVAT(0.944)T(0.056)PRAK	IAT(-163.55)T(-135.91)T(-101.13)T(-111.23)GT(-73.32)AT(-34.08)VAT(12.3)T(-12.3)PRAK	13	2.57749e-260	270.73	2	921.472	0.11851	+	-0.334016	-0.285461	-0.397071	3	-0.338849	0.0559617	0.05324	-0.258518	-0.161239	-0.225154	3	-0.21497	0.0494324	0.224034
1800	E9PVX6	1469	S	E9PVX6	S1469		Mki67	NGPLVVVKTKKMFFNSPQPESAITRKSRERQ	MFFNS(1)PQPESAITRK	MFFNS(84.61)PQPES(-84.61)AIT(-84.61)RK	5	0.000287802	103.67	3	616.95	-0.41393	+	-0.384029	-0.27039	-0.365507	3	-0.339975	0.0609701	0.05324	-0.174205	-0.206161	-0.297126	3	-0.225831	0.0637772	0.224034
4116	O35691;Q3TUQ5	558;559	S	O35691	S558	Pinin	Pnn	IKLPEVSVEPVLTVHSENKSKNKTRSRSRGR	DFPLESIKLPEVSVEPVLT(0.072)VHS(0.928)ENK	DFPLES(-71.79)IKLPEVS(-50.39)VEPVLT(-11.1)VHS(11.1)ENK	22	2.86259e-06	96.022	4	722.369	-0.56361	+	-0.276405	-0.337365	-0.358639	3	-0.324136	0.0426833	0.0537856	-0.234745	-0.292387	-0.19064	3	-0.239257	0.0510236	0.224034
10993	Q9QXM1;Q9QXM1-3	883;864	S	Q9QXM1	S883	Junction-mediating and -regulatory protein	Jmy	KKLRKTVEGLQRRRVSSPMDEVLASLKRGSF	RVS(0.979)S(0.021)PMDEVLASLK	RVS(16.77)S(-16.77)PMDEVLAS(-94.37)LK	3	3.11435e-05	123.58	3	537.932	-0.17522	+	-0.437255	-0.347763	-0.218641	3	-0.334553	0.109904	0.0537856	-0.18673	-0.306607	-0.174118	3	-0.222485	0.0731243	0.224034
13255	Q61937;Q9DAY9;Q5SQB5;E9Q5T3	217;217;217;197	T	Q61937	T217	Nucleophosmin	Npm1;Gm5611	NAQKSNQNGKDLKPSTPRSKGQESFKKQEKT	DLKPS(0.034)T(0.963)PRS(0.003)K	DLKPS(-14.57)T(14.57)PRS(-24.66)K	6	0.000367889	133.04	3	403.539	-2.7249	+	-0.302047	-0.286568	-0.404029	3	-0.330882	0.0638188	0.0537856	-0.144543	-0.154164	-0.283957	3	-0.194221	0.0778618	0.224034
7933	Q80U72;Q80U72-2;D3YU97	1292;1292;32	S	Q80U72	S1292	Protein scribble homolog	Scrib	KTTEAPCSPGSQQPPSPDELPANVKQAYRAF	TTEAPCSPGSQQPPS(1)PDELPANVK	T(-113.96)T(-113.96)EAPCS(-85.07)PGS(-80.47)QQPPS(80.47)PDELPANVK	15	1.03379e-67	160.69	3	863.051	0.017526	+	-0.330637	-0.30991	-0.32789	3	-0.322812	0.0112575	0.0537856	-0.156943	-0.156699	-0.187944	3	-0.167195	0.0179692	0.224034
10362	Q9CZT6	76	S	Q9CZT6	S76	Protein CMSS1	Cmss1	AEDSRKTRKWKKKKISDILAKSEPKPGTPED	KIS(1)DILAK	KIS(46.35)DILAK	3	0.00503202	79.659	3	323.179	0.29138	+	-0.370193	-0.282263	-0.334574	3	-0.32901	0.0442283	0.0537856	-0.185032	-0.170728	-0.244599	3	-0.20012	0.0391783	0.224034
11990	E9Q5C9	410	T	E9Q5C9	T410		Nolc1	PKPAVTPKPSAAKAVTTPKQPAGSNQKPQSR	AVT(0.844)T(0.156)PKQPAGSNQKPQSR	AVT(7.34)T(-7.34)PKQPAGS(-67.54)NQKPQS(-73.01)R	3	0.00341945	91.589	3	658.997	0.8841	+		-0.293163	-0.408172	2	-0.350667	0.0813239	0.0537856		-0.190562	-0.273117	2	-0.231839	0.0583756	0.224034
13407	Q6PGH2	76	T	Q6PGH2	T76	Hematological and neurological expressed 1-like protein	Hn1l	TNPPGGKGSGIFDESTPVQTRQRLNPPGGKT	GSGIFDES(0.013)T(0.987)PVQTR	GS(-95.45)GIFDES(-18.72)T(18.72)PVQT(-73.27)R	9	1.59678e-54	185.71	2	787.348	-0.67167	+	-0.345775	-0.27908	-0.380012	3	-0.334956	0.0513284	0.0537856	-0.127299	-0.17846	-0.21643	3	-0.174063	0.0447277	0.224034
14200	Q9D902	289	T	Q9D902	T289	General transcription factor IIE subunit 2	Gtf2e2	HNEHLAGVLKDYSDITPGK____________	DYS(0.001)DIT(0.999)PGK	DY(-81.82)S(-32.61)DIT(32.61)PGK	6	0.00224941	114.24	2	538.221	-0.065803	+	-0.295395	-0.319094	-0.367952	3	-0.32748	0.0369984	0.0537856	-0.244623	-0.162544	-0.277449	3	-0.228205	0.0591856	0.224034
15	A2A432;A2A432-2;J3QJX0;E9PXY1	250;250;176;176	S	A2A432	S250	Cullin-4B	Cul4b	KSSTAVSSFANSKPGSAKKLVIKNFKDKPKL	SSTAVSSFANSKPGS(1)AK	S(-81.52)S(-81.52)T(-81.52)AVS(-72.12)S(-72.12)FANS(-55.72)KPGS(55.72)AK	15	0.000367902	100.46	3	569.265	-1.6038	+	-0.332575	-0.265993	-0.398738	3	-0.332435	0.0663729	0.0540141	-0.22321	-0.12199	-0.17843	3	-0.174543	0.0507221	0.224034
13776	Q8CH25;Q8CH25-2	74;74	T	Q8CH25	T74	SAFB-like transcription modulator	Sltm	EGGDPDNIELTVSTDTPNKKPTKGKGKKQEA	QAIEEEGGDPDNIELT(0.004)VS(0.036)T(0.036)DT(0.924)PNKKPT(0.001)K	QAIEEEGGDPDNIELT(-24.15)VS(-14.08)T(-14.08)DT(14.08)PNKKPT(-31.68)K	21	3.00166e-13	119.2	4	777.367	1.7391	+	-0.376833	-0.308529	-0.263944	3	-0.316436	0.0568586	0.0542076	-0.11571	-0.242179	-0.175164	3	-0.177684	0.063272	0.224034
10608	Q9DBE9	667	S	Q9DBE9	S667	pre-rRNA processing protein FTSJ3	Ftsj3	RILDPEGLALGAVIASSKKAKRDLIDNSFNR	ILDPEGLALGAVIAS(0.798)S(0.202)KK	ILDPEGLALGAVIAS(5.96)S(-5.96)KK	15	4.91366e-05	99.069	3	621.339	1.6269	+	-0.366017	-0.234451	-0.446646	3	-0.349038	0.107112	0.0542076	-0.142859	-0.178932	-0.224663	3	-0.182151	0.0409969	0.224034
11832	E9PVX6	2162	T	E9PVX6	T2162		Mki67	AQPLEDLDGFQELFQTPAGASDSVTVEESAK	IRAQPLEDLDGFQELFQT(1)PAGASDSVTVEESAK	IRAQPLEDLDGFQELFQT(34.44)PAGAS(-34.44)DS(-45.24)VT(-50.01)VEES(-58.46)AK	18	2.12399e-31	111.18	3	1210.24	-1.3982	+	-0.403733	-0.289121		2	-0.346427	0.0810426	0.0542076	-0.301833	-0.250094		2	-0.275963	0.036585	0.224034
11991	E9Q5C9	411	T	E9Q5C9	T411		Nolc1	KPAVTPKPSAAKAVTTPKQPAGSNQKPQSRK	AVT(0.107)T(0.893)PKQPAGSNQKPQSR	AVT(-9.22)T(9.22)PKQPAGS(-73.03)NQKPQS(-73.89)R	4	0.0014005	97.767	3	658.997	-0.58953	+	-0.283104	-0.308017	-0.373684	3	-0.321602	0.0467932	0.0542076	-0.120903	-0.191411	-0.194098	3	-0.168804	0.0415053	0.224034
1002	B2RY56	678	S	B2RY56	S678	RNA-binding protein 25	Rbm25	LSLKLGASNSPGQPNSVKRKKLPVDSVFNKF	LGAS(0.007)NS(0.993)PGQPNS(1)VK	LGAS(-21.53)NS(21.53)PGQPNS(101.9)VK	12	9.23819e-19	159.26	2	758.316	0.16512	+	-0.37328	-0.301317		2	-0.337298	0.0508857	0.0544149	-0.232183	-0.191559		2	-0.211871	0.0287249	0.224034
12393	H3BL37;O08784;Q05CS0;H3BIX0	324;324;324;324	T	H3BL37	T324	Treacle protein	Tcof1	SVSAKGISGKGPILATPGKTGPAATQAKAER	GPILAT(1)PGK	GPILAT(90.61)PGK	6	0.00487831	95.417	2	467.244	-1.3449	+	-0.346855	-0.28719	-0.294576	3	-0.309541	0.0325256	0.0547782	-0.215981	-0.191694	-0.119981	3	-0.175886	0.0499142	0.224034
3435	G3UWZ0;O88379	1398;1401	S	G3UWZ0	S1398	Bromodomain adjacent to zinc finger domain protein 1A	Baz1a	QLIPLNTAESLSLQHSESKRRGRKRQSTESS	QLIPLNTAES(0.001)LS(0.001)LQHS(0.791)ES(0.207)K	QLIPLNT(-60.51)AES(-28.56)LS(-31.75)LQHS(5.83)ES(-5.83)K	16	1.16624e-08	119.48	3	725.695	-0.88963	+	-0.365785	-0.297811		2	-0.331798	0.0480649	0.0547782	-0.148109	-0.194771		2	-0.17144	0.0329952	0.224034
1811	E9PVX6	1187	S	E9PVX6	S1187		Mki67	FMETPKQKLDFAGNSSGSKRRSRTSKNRSQP	QKLDFAGNS(0.007)S(0.993)GSK	QKLDFAGNS(-21.41)S(21.41)GS(-36.21)K	10	4.51725e-07	143.05	2	709.819	0.76896	+	-0.326122	-0.326684	-0.262119	3	-0.304975	0.0371158	0.0547782	-0.111162	-0.189015	-0.214208	3	-0.171462	0.0537189	0.224034
10306	Q9CXF4	201	S	Q9CXF4	S201	TBC1 domain family member 15	Tbc1d15	SPQDSRTLLVNCQNKSLSQSFENLLDEPAYG	S(0.908)LS(0.909)QS(0.183)FENLLDEPAYGLIQK	S(9.47)LS(9.53)QS(-9.47)FENLLDEPAY(-69.74)GLIQK	1	4.49147e-300	258.02	3	804.697	0.39471	+	-0.469352	-0.268033		2	-0.368692	0.142354	0.0547782	-0.210746	-0.186552		2	-0.198649	0.0171077	0.224034
1822	E9PVX6	404	S	E9PVX6	S404		Mki67	PAKVEAPSAETQKRLSLTQRLVPGEKKTPKG	RLS(1)LTQR	RLS(47.51)LT(-47.51)QR	3	0.00390342	102.62	3	318.502	-0.61687	+	-0.36245	-0.295747	-0.266819	3	-0.308339	0.0490432	0.055035	-0.14888	-0.214108	-0.231673	3	-0.198221	0.0436233	0.224034
2883	Q8CHY6;E9QMN5	594;595	S	Q8CHY6	S594	Transcriptional repressor p66 alpha	Gatad2a	WKKTPLSTGGTLAFVSPSLAVHKTSSAVDRQ	TPLSTGGTLAFVS(0.997)PS(0.003)LAVHK	T(-83.82)PLS(-76.56)T(-72.5)GGT(-68.54)LAFVS(24.67)PS(-24.67)LAVHK	13	1.18004e-23	148.36	3	688.357	0.96304	+	-0.385725	-0.257408	-0.299878	3	-0.314337	0.065369	0.0559839	-0.270096	-0.181721	-0.121888	3	-0.191235	0.0745608	0.224034
13257	Q61937;Q9DAY9;Q5SQB0;Q5SQB5	232;232;204;232	T	Q61937	T232	Nucleophosmin	Npm1	TPRSKGQESFKKQEKTPKTPKGPSSVEDIKA	T(0.994)PKT(0.006)PKGPSSVEDIK	T(22.23)PKT(-22.23)PKGPS(-54.16)S(-54.16)VEDIK	1	0.0042464	91.812	3	555.282	-1.4263	+	-0.33921	-0.274456	-0.293119	3	-0.302262	0.0333313	0.0574554	-0.161518	-0.157247	-0.224352	3	-0.181039	0.0375707	0.224034
8640	Q8BVY0	408	S	Q8BVY0	S408		Rsl1d1	ALLATETPEASAPGTSGKKQKKDVQEFRKPE	ALLATETPEASAPGT(0.204)S(0.796)GKK	ALLAT(-121.58)ET(-103.69)PEAS(-64.95)APGT(-5.9)S(5.9)GKK	16	9.02741e-24	159.26	3	636.982	-0.19512	+	-0.238945	-0.327727	-0.353532	3	-0.306734	0.0601087	0.0574554	-0.122052	-0.20637	-0.260787	3	-0.196403	0.0699024	0.224034
8649	Q8BW10	362	S	Q8BW10	S362	RNA-binding protein NOB1	Nob1	RQKTDVFAPDYIAGVSPFAENDISSRSAILQ	TDVFAPDYIAGVS(1)PFAENDISSR	T(-115.37)DVFAPDY(-69.6)IAGVS(64.88)PFAENDIS(-64.88)S(-64.88)R	13	3.24006e-53	150.59	2	1276.07	0.89881	+	-0.355138	-0.214862	-0.43146	3	-0.33382	0.109861	0.0574554	-0.264936	-0.246846	-0.311711	3	-0.274498	0.0334732	0.224034
12587	P09405	99	T	P09405	T99	Nucleolin	Ncl	TPGKKAVATPAKKNITPAKVIPTPGKKGAAQ	NIT(1)PAKVIPT(1)PGKK	NIT(118.37)PAKVIPT(118.37)PGKK	3	0.000351066	118.37	3	541.947	-0.92786	+	-0.299045	-0.271265	-0.347584	3	-0.305965	0.038627	0.0579508	-0.112169	-0.190218	-0.188113	3	-0.1635	0.0444662	0.224034
12702	P33611;Q8C2T6	133;133	T	P33611	T133	DNA polymerase alpha subunit B	Pola2	KGPLKRVSSTPETPLTKRSVAARSPRQLLSP	RVS(0.062)S(0.106)T(0.819)PET(0.062)PLT(0.951)K	RVS(-11.45)S(-8.88)T(8.88)PET(-13.18)PLT(13.18)K	11	0.000217957	108.25	2	738.331	-0.18751	+	-0.313364	-0.315451	-0.253411	3	-0.294075	0.0352319	0.0580583	-0.112504	-0.254192	-0.221153	3	-0.19595	0.0741298	0.224034
13799	Q8CJF7	1824	T	Q8CJF7	T1824	Protein ELYS	Ahctf1	LPSSGAVEPEPEPQGTPGRLRLRTQPPEPAA	DVSQGTLPSSGAVEPEPEPQGT(1)PGRLR	DVS(-115.76)QGT(-106.38)LPS(-78.04)S(-78.04)GAVEPEPEPQGT(78.04)PGRLR	22	8.18355e-14	124.31	3	947.785	-0.98056	+	-0.313829	-0.257707	-0.344883	3	-0.305473	0.0441847	0.0580583	-0.164383	-0.144984	-0.172661	3	-0.160676	0.0142061	0.224034
2678	Q6EJB6;E9Q9S3	52;76	S	Q6EJB6	S52	U3 small nucleolar RNA-associated protein 14 homolog B	Utp14b	SDGEGKRQKLLEAVSSLGRKNKWKLAERSEA	LLEAVS(0.022)S(0.978)LGRK	LLEAVS(-16.53)S(16.53)LGRK	7	0.000131733	109.16	3	418.227	-1.1087	+	-0.278899	-0.252518	-0.381638	3	-0.304352	0.0682195	0.059279	-0.122838	-0.14076	-0.234213	3	-0.165937	0.0598042	0.224034
12392	H3BL37;O08784;Q05CS0;H3BIX0	395;395;395;395	T	H3BL37	T395	Treacle protein	Tcof1	SAPAKESSQKGAPAVTPGKARPVAAQAGKPE	GAPAVT(1)PGK	GAPAVT(91.31)PGK	6	0.00200511	120.03	2	439.213	1.4862	+	-0.293615	-0.263946	-0.347135	3	-0.301565	0.0421603	0.059279	-0.124732	-0.143851	-0.215981	3	-0.161522	0.0481223	0.224034
318	Q8BWJ3;A2AHQ7	729;729	S	Q8BWJ3	S729	Phosphorylase b kinase regulatory subunit alpha, liver isoform	Phka2	FPMILPTKVLSGHRKSLNLVDSPQPLLKTTP	S(1)LNLVDSPQPLLK	S(76.91)LNLVDS(-76.91)PQPLLK	1	1.83902e-65	188.9	3	501.932	-1.4306	+	-0.226038	-0.33307	-0.32838	3	-0.295829	0.0604865	0.0606483	-0.10459	-0.229781	-0.179982	3	-0.171451	0.0630305	0.224034
541	A2AUY4	358	S	A2AUY4	S358		Baz2b	VNQAKKETYRKLVVPSPDVLKAGNKNTSEES	LVVPS(1)PDVLK	LVVPS(65.04)PDVLK	5	0.00281209	86.699	2	573.812	1.8222	+	-0.313248	-0.234257	-0.355643	3	-0.301049	0.0616056	0.0606483	-0.139564	-0.18014	-0.210078	3	-0.176594	0.0353902	0.224034
2596	Q8BRT1;E9Q8N5;Q08EB6;F7DCH5	495;495;495;495	S	Q8BRT1	S495	CLIP-associating protein 2	Clasp2	STVSSGAQRVLVNSASAQKRSKIPRSQGCSR	VLVNS(0.058)AS(0.942)AQK	VLVNS(-12.14)AS(12.14)AQK	7	0.000284088	115.12	2	548.774	-2.1198	+	-0.256232	-0.343729		2	-0.29998	0.0618702	0.0618307	-0.208388	-0.148473		2	-0.17843	0.0423663	0.224034
11192	Q9WVH4;H3BKE2	279;60	S	Q9WVH4	S279	Forkhead box protein O3	Foxo3	GRAAKKKAALQAAPESADDSPSQLSKWPGSP	AALQAAPES(0.982)ADDS(0.008)PS(0.01)QLSK	AALQAAPES(19.73)ADDS(-20.96)PS(-19.73)QLS(-48.12)K	9	8.22723e-23	148.26	2	983.444	0.49679	+	-0.24265	-0.353861		2	-0.298255	0.0786384	0.0643496	-0.133315	-0.218747		2	-0.176031	0.0604096	0.224034
1825	E9PVX6	503	S	E9PVX6	S503		Mki67	KRGETPTKRKSLGTHSPAVLKTIIKERPQSP	S(0.959)LGT(0.042)HS(0.999)PAVLK	S(13.66)LGT(-13.66)HS(29.02)PAVLK	6	0.000874612	124.2	3	423.86	0.36713	+	-0.402118	-0.186146	-0.353378	3	-0.313881	0.113274	0.0643688	-0.257174	-0.158684	-0.0996806	3	-0.171846	0.0795676	0.224034
6808	Q61235	213	S	Q61235	S213	Beta-2-syntrophin	Sntb2	ASPQSPSFSGSEDSGSPKHQNTTKDRKVIPL	KPSLVSDLPWEGASPQSPS(0.001)FS(0.004)GS(0.016)EDS(0.207)GS(0.772)PK	KPS(-76.34)LVS(-72.27)DLPWEGAS(-40.79)PQS(-35.22)PS(-29.35)FS(-23.21)GS(-16.8)EDS(-5.71)GS(5.71)PK	28	3.65127e-07	79.382	4	785.858	-1.3171	+	-0.310301	-0.197042	-0.413266	3	-0.306869	0.108153	0.0654998	-0.203033	-0.20577	-0.125481	3	-0.178095	0.0455851	0.224034
7792	Q7TPV4	1321	S	Q7TPV4	S1321	Myb-binding protein 1A	Mybbp1a	PQSALPKKRARLSLVSRSPSLLQSGVKKRRV	LS(0.004)LVS(0.931)RS(0.065)PSLLQS(1)GVK	LS(-23.98)LVS(11.58)RS(-11.58)PS(-34.2)LLQS(34.2)GVK	5	0.00495282	91.964	3	610.976	-1.338	+	-0.553945	-0.184854	-0.288629	3	-0.342476	0.190346	0.066691	-0.24672	-0.140417	-0.114444	3	-0.167194	0.0700854	0.224034
12612	P14148;F6XI62	17;43	T	P14148	T17	60S ribosomal protein L7	Rpl7	EAVPEKKKKVATVPGTLKKKVPAGPKTLKKK	VATVPGT(1)LKK	VAT(-51.31)VPGT(51.31)LKK	7	0.00954405	76.24	3	365.205	0.065574	+	-0.300544	-0.234756	-0.279941	3	-0.271747	0.0336505	0.069229	-0.233554	-0.176689	-0.119157	3	-0.176467	0.0571991	0.224034
13384	Q6P5D8	1936	T	Q6P5D8	T1936	Structural maintenance of chromosomes flexible hinge domain-containing protein 1	Smchd1	SSVNEDLDNQLQYLHTPDMKKKKQELDEQEK	LSSVNEDLDNQLQYLHT(1)PDMK	LS(-108.63)S(-108.63)VNEDLDNQLQY(-58)LHT(58)PDMK	17	5.42583e-54	153.36	3	847.384	-2.1155	+	-0.30176	-0.220274	-0.302829	3	-0.274954	0.0473577	0.0700263	-0.231928	-0.138992	-0.124732	3	-0.165217	0.0582115	0.224034
12023	P25425;P25425-2;P25425-12;P25425-10;P25425-4;P25425-7;P25425-9;P25425-11;P25425-8;P25425-3;I1E4X2;P25425-6;P25425-5;E9Q6Z8;F8VQL7	271;271;293;271;265;271;271;283;271;271;231;271;283;294;283	T	P25425	T271	POU domain, class 2, transcription factor 1	Pou2f1	TIAAASVQTLPQSQSTPKRIDTPSLEEPSDL	TIAAASVQTLPQS(0.005)QS(0.158)T(0.837)PK	T(-76.95)IAAAS(-73.59)VQT(-59.76)LPQS(-22.66)QS(-7.24)T(7.24)PK	16	0.000237568	88.951	3	636.654	-1.5094	+	-0.282896	-0.281814		2	-0.282355	0.000764834	0.0703187	-0.210586	-0.200694		2	-0.20564	0.00699477	0.224034
5230	P62754	242	S	P62754	S242	40S ribosomal protein S6	Rps6	QIAKRRRLSSLRASTSKSESSQK________	LSSLRAST(0.001)S(0.999)K	LS(-65.71)S(-60.11)LRAS(-48.31)T(-32.39)S(32.39)K	9	5.61263e-05	151.66	2	565.284	-1.6306	+	-0.241853	-0.187775	-0.785437	3	-0.405022	0.330557	0.0763631	-0.204554	-0.199475	-0.163966	3	-0.189332	0.0221137	0.224034
6290	Q4VA53;Q4VA53-3;F8WHU5;Q4VA53-2	1182;1182;1182;653	S	Q4VA53	S1182	Sister chromatid cohesion protein PDS5 homolog B	Pds5b	PGRIKGRLDSSEMDHSENEDYTMSSPLPGKK	GRLDS(0.001)S(0.003)EMDHS(0.994)ENEDY(0.001)T(0.001)MSSPLPGK	GRLDS(-32.83)S(-24.55)EMDHS(24.55)ENEDY(-30.27)T(-32.24)MS(-40.5)S(-44.22)PLPGK	11	0.000480928	72.051	3	954.725	1.313	+	-0.425807	-0.176017		2	-0.300912	0.176628	0.0908695	-0.138682	-0.34441		2	-0.241546	0.145472	0.224034
11009	Q9QY06;Q9QY06-2;Q9QY06-3;E9PZW8;E9QKV6;E9PWZ6	1302;1331;1302;1313;1302;1313	S	Q9QY06	S1302	Unconventional myosin-IXb	Myo9b	EIWRGKKLASAVLSQSLDLSEKHRATGAALT	KLASAVLSQS(0.999)LDLS(0.001)EK	KLAS(-107.72)AVLS(-33.78)QS(29.78)LDLS(-29.78)EK	10	2.19241e-34	165.19	3	590.308	0.46938	+	-0.254519	-0.21332	-0.235301	3	-0.23438	0.0206153	0.0908695	-0.187069	-0.139404	-0.144076	3	-0.15685	0.0262748	0.224034
452	A2APB8	312	S	A2APB8	S312	Targeting protein for Xklp2	Tpx2	ARGTRGCTIIKPFNLSKGKKRTFDEAASTYV	GCTIIKPFNLS(1)K	GCT(-86.2)IIKPFNLS(86.2)K	11	0.00119936	91.845	3	486.579	-0.15663	+	-0.303416	-0.197083	-0.219611	3	-0.240037	0.0560324	0.0908695	-0.141105	-0.168348	-0.293981	3	-0.201144	0.0815445	0.224034
7352	Q6NZF1	171	S	Q6NZF1	S171	Zinc finger CCCH domain-containing protein 11A	Zc3h11a	VINAADDDEDDDDQFSEEGDESKTPALQPSP	VES(0.001)S(0.001)ENVPS(0.001)PTHPPVVINAADDDEDDDDQFS(0.994)EEGDES(0.003)K	VES(-32.55)S(-32.55)ENVPS(-28.63)PT(-35.07)HPPVVINAADDDEDDDDQFS(24.89)EEGDES(-24.89)K	31	8.46201e-21	72.116	4	1049.43	-0.67557	+	-0.205073	-0.308362		2	-0.256717	0.0730361	0.092111	-0.126359	-0.460322		2	-0.29334	0.236148	0.224034
5228	P62754	236	S	P62754	S236	40S ribosomal protein S6	Rps6	KEKRQEQIAKRRRLSSLRASTSKSESSQK__	LS(0.004)S(0.996)LRASTSK	LS(-23.68)S(23.68)LRAS(-49.73)T(-51.97)S(-58.66)K	3	0.000202401	151.2	2	565.284	-2.2884	+	-0.206783	-0.221762	-0.21643	3	-0.214991	0.00759257	0.10311	-0.245118	-0.229244	-0.140162	3	-0.204841	0.0565732	0.224034
13203	Q61029;Q61029-3	298;258	T	Q61029	T298	Lamina-associated polypeptide 2, isoforms beta/delta/epsilon/gamma	Tmpo	TIKASSNESLVANRLTGNFKHASSILPITEF	ASSNESLVANRLT(1)GNFK	AS(-65.99)S(-60.72)NES(-50.6)LVANRLT(50.6)GNFK	13	0.00048246	98.292	3	629.97	-2.8315	+	-0.277185	-0.271062	-0.125839	3	-0.224695	0.0856669	0.103258	-0.172369	-0.273289	-0.192065	3	-0.212575	0.0534946	0.224034
6155	Q3UVG3	834	S	Q3UVG3	S834	Protein FAM91A1	Fam91a1	LSEWSGRSPSSLLIASLHL____________	SPSSLLIAS(1)LHL	S(-107.1)PS(-88.74)S(-70.71)LLIAS(70.71)LHL	9	7.28119e-05	131.06	2	659.344	-0.18983	+	-0.296244	-0.190225		2	-0.243235	0.0749672	0.103633	-0.249834	-0.179799		2	-0.214816	0.0495226	0.224034
14400	Q9Z1X4;Q9Z1X4-3	770;783	T	Q9Z1X4	T770	Interleukin enhancer-binding factor 3	Ilf3	GQQQPYNQSQYSSYGTPQGKQKGYGHGQGSY	ASYSSGYQSHQGQQQPYNQSQYS(0.003)S(0.007)Y(0.037)GT(0.953)PQGK	AS(-59.77)Y(-59.79)S(-59.69)S(-59.69)GY(-59.73)QS(-59.69)HQGQQQPY(-50.6)NQS(-43.59)QY(-35.98)S(-24.71)S(-21.47)Y(-14.16)GT(14.16)PQGK	27	3.26097e-07	68.657	4	881.122	-0.2049	+	-0.233662	-0.139794	-0.345335	3	-0.239597	0.102899	0.104954	-0.234188	-0.287174	-0.0719188	3	-0.19776	0.112156	0.224034
4735	P33609	192	S	P33609	S192	DNA polymerase alpha catalytic subunit	Pola1	AQITPPPVLIPKKKRSTGALLNPFSVHTPKA	S(0.985)T(0.015)GALLNPFS(1)VHTPK	S(18.23)T(-18.23)GALLNPFS(39.12)VHT(-39.12)PK	1	0.000419014	99.923	3	576.93	0.78094	+	-0.397907	-0.133695		2	-0.265801	0.186826	0.117591	-0.349569	-0.134795		2	-0.242182	0.151868	0.224034
7585	Q6PR54;Q6PR54-3;Q6PR54-2	1387;1394;1387	S	Q6PR54	S1387	Telomere-associated protein RIF1	Rif1	TASVVARTEQIVNEDSQAAALAPNPKTLRRS	ESTASVVARTEQIVNEDS(1)QAAALAPNPK	ES(-49.1)T(-49.1)AS(-50.36)VVART(-44.33)EQIVNEDS(44.33)QAAALAPNPK	18	0.000957943	68.97	3	992.815	-2.6992	+	-0.276873	-0.106827	-0.308927	3	-0.230875	0.108618	0.118305	-0.214049	-0.132721	-0.20287	3	-0.183213	0.0440832	0.224034
6629	Q5Y5T1;Q5Y5T1-2	345;333	S	Q5Y5T1	S345	Probable palmitoyltransferase ZDHHC20	Zdhhc20	SIGSNQPFPIKPLSESKNRLLDSESQWLENG	SIGSNQPFPIKPLS(0.072)ES(0.928)K	S(-100.45)IGS(-97.54)NQPFPIKPLS(-11.09)ES(11.09)K	16	3.28382e-06	137.72	3	636.987	0.17909	+	-0.2249	-0.177479	-0.182842	3	-0.195074	0.0259688	0.121082	-0.187098	-0.1334	-0.158151	3	-0.159549	0.0268762	0.224034
10458	Q9D3A8	367	S	Q9D3A8	S367	Carboxyl-terminal PDZ ligand of neuronal nitric oxide synthase protein	Nos1ap	VQELELKLSGQNTMGSQDSLLEITFRSGALP	LSGQNTMGS(1)QDSLLEITFR	LS(-127.26)GQNT(-71.43)MGS(56.24)QDS(-56.24)LLEIT(-126.56)FR	9	1.14969e-182	220.76	2	1089	-0.56079	+	-0.232547	-0.219222	-0.128787	3	-0.193519	0.056454	0.122861	-0.161338	-0.168521	-0.160978	3	-0.163612	0.00425443	0.224034
3434	G3UWZ0;O88379	1542;1545	S	G3UWZ0	S1542	Bromodomain adjacent to zinc finger domain protein 1A	Baz1a	QKLGLHVSPSTVDQVSTPLAAKKSRI_____	LGLHVSPS(0.001)TVDQVS(0.838)T(0.161)PLAAKK	LGLHVS(-52.43)PS(-30.9)T(-36.49)VDQVS(7.17)T(-7.17)PLAAKK	14	1.03939e-05	93.495	4	557.798	-0.38754	+	-0.551618	-0.0771397	-0.271586	3	-0.300115	0.238522	0.122999	-0.449077	-0.179542	-0.0885613	3	-0.23906	0.187483	0.224034
6029	Q3UHJ0;Q3UHJ0-2	640;559	S	Q3UHJ0	S640	AP2-associated protein kinase 1	Aak1	TQRAGHRRILSDVTHSAVFGVPASKSTQLLQ	ILS(0.034)DVT(0.096)HS(0.87)AVFGVPASK	ILS(-14.08)DVT(-9.59)HS(9.59)AVFGVPAS(-104.3)K	8	9.34968e-11	137.52	3	603.305	0.16025	+		-0.291205	-0.104146	2	-0.197675	0.132271	0.140438		-0.196632	-0.175831	2	-0.186231	0.0147086	0.224034
9168	Q8CJF7	1851	S	Q8CJF7	S1851	Protein ELYS	Ahctf1	EPAAEETPSRTKVRLSSVRKGTPRRLKKSVE	VRLS(0.776)S(0.224)VR	VRLS(5.4)S(-5.4)VR	4	0.0113188	91.265	3	299.495	1.2038	+	-0.100015	-0.183235	-0.194181	3	-0.159144	0.0514984	0.184123	-0.673482	-0.235689	-0.260334	3	-0.389835	0.245954	0.224034
12539	O89001	1367	T	O89001	T1367	Carboxypeptidase D	Cpd	SKKSLLSHEFQDETDTEEETLYSSKH_____	S(0.001)LLS(0.002)HEFQDET(0.075)DT(0.95)EEET(0.837)LY(0.08)S(0.038)S(0.016)KH	S(-35.12)LLS(-31.14)HEFQDET(-13.67)DT(13.67)EEET(10.48)LY(-10.48)S(-13.84)S(-17.75)KH	13	0.00298041	57.248	4	722.041	0.75766	+	-0.127756	-0.192885		2	-0.16032	0.0460527	0.196138	-0.245093	-0.343471		2	-0.294282	0.0695635	0.224034
12540	O89001	1371	T	O89001	T1371	Carboxypeptidase D	Cpd	LLSHEFQDETDTEEETLYSSKH_________	S(0.001)LLS(0.002)HEFQDET(0.075)DT(0.95)EEET(0.837)LY(0.08)S(0.038)S(0.016)KH	S(-35.12)LLS(-31.14)HEFQDET(-13.67)DT(13.67)EEET(10.48)LY(-10.48)S(-13.84)S(-17.75)KH	17	0.00298041	57.248	4	722.041	0.75766	+	-0.127756	-0.192885		2	-0.16032	0.0460527	0.196138	-0.245093	-0.343471		2	-0.294282	0.0695635	0.224034
6004	Q3UH06;Q3UH06-2;Q3UH06-3;F6UB40	1659;1577;1713;279	S	Q3UH06	S1659	Ras-responsive element-binding protein 1	Rreb1	AAEQAAEPSAPKEQASPGETDPQSPAAIVQD	EQAS(0.971)PGET(0.029)DPQS(0.999)PAAIVQDLLELCGK	EQAS(15.28)PGET(-15.28)DPQS(31.46)PAAIVQDLLELCGK	4	8.9919e-31	134.21	3	971.759	-1.9199	+	-0.164887	-0.145214		2	-0.155051	0.0139105	0.198248	-0.113241	-0.262156		2	-0.187698	0.105298	0.224034
2938	P59328;P59328-3;E9QPB3	898;861;898	S	P59328	S898	WD repeat and HMG-box DNA-binding protein 1	Wdhd1	SSDTPALKSGAVFSSSQGWVNPFKVVVSSKE	S(0.006)GAVFS(0.041)S(0.159)S(0.794)QGWVNPFK	S(-21.1)GAVFS(-12.89)S(-6.98)S(6.98)QGWVNPFK	8	0.000572899	97.083	2	889.401	0.5966	+	-0.294444	-0.0726964		2	-0.18357	0.156799	0.223561	-0.169968	-0.275503		2	-0.222736	0.0746244	0.224034
9465	Q8R2M2	110	S	Q8R2M2	S110	Deoxynucleotidyltransferase terminal-interacting protein 2	Dnttip2	IVRVTRKRQIVIASTSKSTVRKRQKVAPQHA	RQIVIAS(0.078)T(0.078)S(0.844)K	RQIVIAS(-10.33)T(-10.33)S(10.33)K	9	9.14792e-06	151.7	2	591.816	1.1493	+		-0.11817	-0.123688	2	-0.120929	0.00390175	0.24707		-0.164132	-0.174205	2	-0.169169	0.00712289	0.224034
8764	Q8C0T5;Q8C0T5-2	1543;1543	S	Q8C0T5	S1543	Signal-induced proliferation-associated 1-like protein 1	Sipa1l1	SPTPESQKNFKFHALSSPQSPFPTTPTSRRA	FHALS(0.908)S(0.088)PQS(0.003)PFPT(0.12)T(0.868)PT(0.009)S(0.003)RR	FHALS(10.02)S(-10.02)PQS(-24.14)PFPT(-8.49)T(8.49)PT(-19.68)S(-25.29)RR	5	5.5634e-55	176.88	3	758.675	-1.0445	+	-0.240755	-0.232117	-0.0187837	3	-0.163885	0.125736	0.25026	-0.175367	-0.230793	-0.15238	3	-0.18618	0.0403091	0.224034
9464	Q8R2M2	108	S	Q8R2M2	S108	Deoxynucleotidyltransferase terminal-interacting protein 2	Dnttip2	EPIVRVTRKRQIVIASTSKSTVRKRQKVAPQ	RQIVIAS(0.929)T(0.068)S(0.002)K	RQIVIAS(11.35)T(-11.35)S(-25.85)K	7	8.83141e-05	126.5	2	591.816	0.27948	+	-0.101204	-0.166725	-0.0858255	3	-0.117918	0.0429619	0.265449	-0.255658	-0.169046	-0.112973	3	-0.179226	0.0718851	0.224034
5661	Q14B71	886	S	Q14B71	S886	Cell division cycle-associated protein 2	Cdca2	TRLQRDLENTGLVWLSPSPSTLQKPRRRMTI	DLENTGLVWLS(0.997)PS(0.003)PSTLQKPR	DLENT(-33.4)GLVWLS(25.55)PS(-25.55)PS(-39.98)T(-42.79)LQKPR	11	0.00145217	73.057	3	806.74	2.2493	+	-0.250998	-0.26649	0.0121729	3	-0.168438	0.156606	0.310009	-0.245389	-0.283972	-0.0678517	3	-0.199071	0.115265	0.224034
4319	O89032;O89032-3;O89032-2	812;769;784	S	O89032	S812	SH3 and PX domain-containing protein 2A	Sh3pxd2a	SELPPQMASEGSRRGSADIIPLTATTPPCVP	RGS(1)ADIIPLTATTPPCVPKK	RGS(44.96)ADIIPLT(-44.96)AT(-54.6)T(-57.26)PPCVPKK	3	0.00336228	84.94	4	551.289	0.69173	+	-0.0744095	-0.125478	-0.0993007	3	-0.0997293	0.0255368	0.313583	-0.164026	-0.254051	-0.172778	3	-0.196952	0.049643	0.224034
9835	Q91Z31;Q91Z31-2	308;308	S	Q91Z31	S308	Polypyrimidine tract-binding protein 2	Ptbp2	AFAKETSLLAVPGALSPLAIPNAAAAAAAAA	ETSLLAVPGALS(1)PLAIPNAAAAAAAAAAGR	ET(-50.6)S(-46.51)LLAVPGALS(46.51)PLAIPNAAAAAAAAAAGR	12	2.26278e-06	85.595	2	1383.73	0.58625	+	-0.0801012		-0.0459876	2	-0.0630444	0.0241219	0.420279	-0.189799		-0.0929311	2	-0.141365	0.068496	0.224034
14366	Q9WU62;Q9WU62-2	775;771	T	Q9WU62	T775	Inner centromere protein	Incenp	MTVDVQSPVCTSYQMTPQGPKSIPKISVDDY	VLNMTVDVQSPVCTSYQMT(1)PQGPK	VLNMT(-117.31)VDVQS(-90.21)PVCT(-56.57)S(-52.62)Y(-47.81)QMT(47.81)PQGPK	19	1.47516e-42	142.93	3	920.753	-0.85382	+	-0.280835	-0.00275345		2	-0.141794	0.196633	0.481429	-0.156822	-0.338008		2	-0.247415	0.128118	0.224034
9584	Q8VCD7;I7HLQ5	395;136	S	Q8VCD7	S395	Lysine-specific demethylase 4C	Kdm4c	CKRPKPEEDEEFAEFSGEEGANPAMGPRHLK	RPKPEEDEEFAEFS(1)GEEGANPAMGPR	RPKPEEDEEFAEFS(93.8)GEEGANPAMGPR	14	4.23921e-07	106.37	4	739.817	-0.40172	+	-0.0596778	-0.144917	0.0114455	3	-0.0643832	0.0782875	0.563318	-0.468052	-0.19597	-0.106972	3	-0.256998	0.188117	0.224034
6811	Q61286	385	S	Q61286	S385	Transcription factor 12	Tcf12	LTGTSQWPRAGGQAPSSPSYENSLHSLKNRV	AGGQAPS(0.861)S(0.137)PS(0.002)YENSLHSLK	AGGQAPS(7.99)S(-7.99)PS(-25.58)Y(-74.14)ENS(-90.93)LHS(-140.5)LK	7	2.9221e-88	181.64	3	670.637	0.057867	+	-0.0691324		0.00145297	2	-0.0338397	0.0499114	0.638868	-0.124341		-0.117835	2	-0.121088	0.0046009	0.224034
4540	P18608;D3Z607	95;85	S	P18608	S95	Non-histone chromosomal protein HMG-14	Hmgn1	TENQSPASEEEKEAKSD______________	QADVADQQTTELPAENGET(0.004)ENQS(0.015)PAS(0.174)EEEKEAKS(0.808)D	QADVADQQT(-59.84)T(-57.87)ELPAENGET(-23.59)ENQS(-17.38)PAS(-6.68)EEEKEAKS(6.68)D	34	6.26e-05	79.917	4	964.66	-2.7075	+		-0.384987	0.150046	2	-0.11747	0.378326	0.774729		-0.391303	-0.0896932	2	-0.240498	0.21327	0.224034
10287	Q9CWE0	234	S	Q9CWE0	S234	Mitochondrial fission regulator 1-like	Mtfr1l	CSSSEEDDCISLSKASSFADMMGILKDFHRI	AS(0.818)S(0.182)FADMMGILK	AS(6.54)S(-6.54)FADMMGILK	2	0.000147979	110.15	2	683.793	-2.0809	+	-0.00192384	0.0136797	-0.0822467	3	-0.0234969	0.0514734	0.793273	-0.103735	-0.222233	-0.169939	3	-0.165302	0.0593845	0.224034
13613	Q8BLH7;D3YWU7	135;75	T	Q8BLH7	T135	HIRA-interacting protein 3	Hirip3	KKTCLRRALKKAVESTDEDHQTDLDAKMGLE	AVES(1)T(1)DEDHQT(1)DLDAK	AVES(127.96)T(127.96)DEDHQT(127.96)DLDAK	5	7.55826e-77	195.09	2	1007.34	2.2259	+	0.500867	-0.0573075	-1.24321	3	-0.266551	0.890668	0.846697	-0.169204	-0.123788	-1.28673	3	-0.526573	0.658704	0.224034
13001	Q3U1F9	245	T	Q3U1F9	T245	Phosphoprotein associated with glycosphingolipid-enriched microdomains 1	Pag1	NKKCRHSANAESILGTCSDLDEESPPPVPVK	HS(0.001)ANAES(0.053)ILGT(0.795)CS(0.15)DLDEES(0.001)PPPVPVK	HS(-30.52)ANAES(-11.74)ILGT(7.23)CS(-7.23)DLDEES(-31.33)PPPVPVK	11	4.33695e-05	77.576	3	943.76	1.4542	+	-0.000256309	0.076968		2	0.0383558	0.0546058	0.947456	-0.35822	-0.26572		2	-0.31197	0.0654075	0.224034
3938	J3QNH8	247	S	J3QNH8	S247		Gm7694	LSLSPISLAESWENSSPPPQARTSSLDNEGL	LSLSPISLAESWENS(0.026)S(0.973)PPPQAR	LS(-44.31)LS(-49.03)PIS(-39.94)LAES(-37.16)WENS(-15.65)S(15.65)PPPQAR	16	1.09512e-167	210.58	3	816.06	-0.72618	+	0.0930363	0.00616643	-0.0244857	3	0.0249057	0.0609608	0.963615	-0.185145	-0.187903	-0.158995	3	-0.177348	0.0159533	0.224034
8075	Q80XK6;Q80XK6-5	255;255	S	Q80XK6	S255	Autophagy-related protein 2 homolog B	Atg2b	SPVCSTAPVETEPKLSPSWNPKIVYEPHPQL	S(0.469)S(0.469)PVCS(0.031)T(0.031)APVET(0.001)EPKLS(0.979)PS(0.02)WNPK	S(0)S(0)PVCS(-11.81)T(-11.81)APVET(-30.95)EPKLS(16.99)PS(-16.99)WNPK	17	2.74602e-09	113.13	4	665.294	0.5188	+	0.0195317	0.0694091	-0.00889811	3	0.0266809	0.0396401	0.984474	-0.361935	-0.195629	-0.0753279	3	-0.210964	0.143918	0.224034
9315	Q8K352	113	S	Q8K352	S113	SAM and SH3 domain-containing protein 3	Sash3	EEMGDTLEEGSASPTSPDCSLDSPGPEKMAL	ALSEEMGDTLEEGS(0.001)AS(0.006)PT(0.058)S(0.847)PDCS(0.087)LDS(0.001)PGPEK	ALS(-55.71)EEMGDT(-52.84)LEEGS(-31.65)AS(-21.46)PT(-11.62)S(9.87)PDCS(-9.87)LDS(-30.29)PGPEK	19	2.67086e-07	72.566	3	1091.78	-0.4134	+	-0.182435	0.479949		2	0.148757	0.468376	0.99527	-0.310438	-0.270018		2	-0.290228	0.0285818	0.224034
9689	Q8VI33	196	S	Q8VI33	S196	Transcription initiation factor TFIID subunit 9	Taf9	SLTGQRFTVQMPASQSPAVKASIPATSTVQN	FTVQMPAS(0.008)QS(0.992)PAVK	FT(-132.47)VQMPAS(-20.77)QS(20.77)PAVK	10	1.31169e-113	208.52	2	785.87	-0.35074	+	-0.319393	-0.291112	-0.31372	3	-0.308075	0.0149615	0.055035	-0.134623	-0.163182	-0.148572	3	-0.148792	0.0142808	0.224062
11962	E9Q3G8	594	T	E9Q3G8	T594		Nup153	SSSYKKRSAPCEDPFTPAKILREGSVLDILK	RSAPCEDPFT(1)PAK	RS(-107.9)APCEDPFT(107.9)PAK	10	1.58261e-06	139.49	3	519.225	-0.60368	+	-0.438791	-0.330572	-0.249883	3	-0.339749	0.0947879	0.0516108	-0.221466	-0.373362	-0.0602822	3	-0.21837	0.156563	0.224398
6120	Q3UPL0;S4R2A9;Q3UPL0-2;S4R256;S4R1Y8	801;502;762;113;26	S	Q3UPL0	S801	Protein transport protein Sec31A	Sec31a	CKAQGKPVSGQESSQSPYERQPLSKGRPGPV	AQGKPVSGQES(0.002)S(0.023)QS(0.975)PYERQPLSK	AQGKPVS(-48.08)GQES(-26.3)S(-16.33)QS(16.33)PY(-36.93)ERQPLS(-56.39)K	14	0.00083501	87.098	3	856.741	0.43461	+	0.252538	0.309034		2	0.280786	0.0399488	0.0981725	0.13834	0.0973614	0.162999	3	0.1329	0.0331552	0.224823
9258	Q8K298	444	S	Q8K298	S444	Actin-binding protein anillin	Anln	ELACLRGRLDKGNLWSAEKNEKSRSKHLETK	GNLWS(1)AEK	GNLWS(81.68)AEK	5	0.00214975	102.4	2	492.713	1.0467	+	-0.379396	-0.354991	-0.36916	3	-0.367849	0.0122552	0.0466121	-0.115943	-0.238388	-0.115444	3	-0.156592	0.070838	0.225084
1807	E9PVX6	452	S	E9PVX6	S452		Mki67	GLPGLSSVDISNFGDSINKSEGMPMKRRRVS	LATAAEQTCSGLPGLSSVDISNFGDS(1)INK	LAT(-102.71)AAEQT(-101.56)CS(-101.39)GLPGLS(-70.03)S(-65.88)VDIS(-38.44)NFGDS(38.44)INK	26	4.69846e-27	104.81	3	1011.47	0.62843	+	-0.239382	-0.120514	-0.134974	3	-0.164956	0.0648582	0.165086	-0.331792	-0.137779	-0.105987	3	-0.191853	0.122229	0.225084
4557	P19426;P19426-2;G3UY39	51;51;51	S	P19426	S51	Negative elongation factor E	Nelfe	SSSGPASQGGVKRSLSEQPVVDTATATEQAK	RSLS(0.998)EQPVVDT(0.002)ATATEQAK	RS(-38.12)LS(28.19)EQPVVDT(-28.19)AT(-33.74)AT(-54.31)EQAK	4	4.61463e-57	173.25	2	1056	1.3753	+	0.285445	0.262878	0.221965	3	0.256762	0.0321789	0.133293	0.0965898	0.21442	0.136005	3	0.149005	0.0599811	0.225111
7225	Q6A0A9	382	S	Q6A0A9	S382	Constitutive coactivator of PPAR-gamma-like protein 1	FAM120A	PQTSLQAKPAVPQVPSPGGTPGQAPYPYSLS	PAVPQVPS(0.794)PGGT(0.203)PGQAPY(0.001)PY(0.001)S(0.001)LSEPALTLDTSGK	PAVPQVPS(5.92)PGGT(-5.92)PGQAPY(-30.74)PY(-30.74)S(-30.45)LS(-34.48)EPALT(-37.96)LDT(-47.47)S(-50.09)GK	8	1.57868e-10	74.973	4	865.673	0.33414	+	0.255899	0.312664	0.209511	3	0.259358	0.0516635	0.134372	0.0547925	0.148356	0.309122	3	0.170757	0.128636	0.225111
13936	Q8VDD5	1151	T	Q8VDD5	T1151	Myosin-9	Myh9	DLGEELEALKTELEDTLDSTAAQQELRSKRE	DLGEELEALKTELEDT(0.963)LDS(0.019)T(0.018)AAQQELR	DLGEELEALKT(-44.58)ELEDT(17.03)LDS(-17.03)T(-17.24)AAQQELR	16	1.09278e-07	93.889	3	1033.15	-1.6188	+	-0.247176		-0.202461	2	-0.224818	0.0316182	0.0772223	-0.104248		-0.151982	2	-0.128115	0.0337533	0.225789
5229	P62754	240	S	P62754	S240	40S ribosomal protein S6	Rps6	QEQIAKRRRLSSLRASTSKSESSQK______	LS(0.137)S(0.863)LRAS(0.971)T(0.025)S(0.003)KSESSQK	LS(-8.02)S(8.02)LRAS(15.86)T(-15.86)S(-25.94)KS(-35.55)ES(-35.55)S(-40.5)QK	7	3.03581e-05	158.86	2	928.414	-0.62132	+	-0.102389	-0.0844313	-0.205367	3	-0.130729	0.0652587	0.253578	-0.210292	-0.121541	-0.155913	3	-0.162582	0.0447495	0.225789
7595	Q6PR54;Q6PR54-3;Q6PR54-2	1043;1050;1043	S	Q6PR54	S1043	Telomere-associated protein RIF1	Rif1	SSPKIKSGKLLEEEKSTDFVFIPPEGKETKA	LLEEEKS(0.818)T(0.182)DFVFIPPEGKETK	LLEEEKS(6.54)T(-6.54)DFVFIPPEGKET(-74.01)K	7	4.29234e-08	140.95	4	629.811	-1.1458	+	-0.338149	-0.210581	-0.449463	3	-0.332731	0.119533	0.0590624	-0.172136	-0.12226	-0.177911	3	-0.157436	0.0305995	0.225848
14543	P48025;E9PWE9	130;130	Y	P48025	Y130	Tyrosine-protein kinase SYK;Tyrosine-protein kinase	Syk	KTGPFEDLKENLIREYVKQTWNLQGQALEQA	ENLIREY(1)VK	ENLIREY(87.15)VK	7	0.00842793	87.149	3	415.208	-0.24328	+	0.0808789	-0.0229352	-0.0295867	3	0.00945235	0.0619466	0.912919	0.184555	0.136308	0.110911	3	0.143925	0.037408	0.226031
631	Q9Z148-2;A2CG76;Q9Z148;Q9Z148-3	230;287;287;230	S	Q9Z148-2	S230	Histone-lysine N-methyltransferase EHMT2	Ehmt2	KVTSDVAKRRKLNSGSLSEDLGSAGGSGDII	LNS(0.099)GS(0.901)LSEDLGSAGGSGDIILEK	LNS(-9.61)GS(9.61)LS(-33.87)EDLGS(-72.89)AGGS(-89.64)GDIILEK	5	4.62846e-293	244.75	2	1150.04	0.013364	+		0.418268	0.396314	2	0.407291	0.0155236	0.047942		0.0952042	0.177302	2	0.136253	0.0580522	0.226079
7451	Q6PAL0	149	S	Q6PAL0	S149	BEN domain-containing protein 3	Bend3	HKIMEKKNPPSGDLLSPYELFEKANSSSGPS	KNPPSGDLLS(1)PYELFEK	KNPPS(-44.38)GDLLS(39.97)PY(-39.97)ELFEK	10	3.13931e-05	105.94	3	671.99	0.70246	+	0.523902	0.57725	0.534097	3	0.545083	0.0283201	0.0206485	0.109982	0.0935267	0.198281	3	0.13393	0.0563337	0.226806
12806	P58854;E9Q0R3	214;214	T	P58854	T214	Gamma-tubulin complex component 3	Tubgcp3	PRLAWTLTGNQPSSQTPTSKGFPNALSRNLT	LAWTLTGNQPS(0.003)S(0.049)QT(0.889)PT(0.049)S(0.012)K	LAWT(-97.93)LT(-80.86)GNQPS(-25.03)S(-12.62)QT(12.62)PT(-12.62)S(-18.86)K	14	9.831e-07	123.84	3	666.317	-0.67877	+	0.343802	0.327195	0.345843	3	0.338947	0.010228	0.0708648	0.148082	0.159296	0.114147	3	0.140508	0.0235081	0.226806
11021	Q9QYB5;Q9QYB5-2	423;423	S	Q9QYB5	S423	Gamma-adducin	Add3	ATVTAFSFEDDSAPLSPLKFMAQRQQREKTR	SDVEIPATVTAFSFEDDSAPLS(1)PLK	S(-117.23)DVEIPAT(-101.49)VT(-96.61)AFS(-68.48)FEDDS(-58.91)APLS(58.91)PLK	22	3.63057e-191	206.31	3	906.093	-0.95168	+	0.16468	0.38135	0.259424	3	0.268485	0.108619	0.132987	0.0934064	0.109342	0.201854	3	0.134867	0.0585564	0.226806
2331	E9Q5C9	503	S	E9Q5C9	S503		Nolc1	TPKPPAKKKAAGGAVSTPAPGKKAEAKSSSS	AAGGAVS(0.908)T(0.092)PAPGK	AAGGAVS(9.92)T(-9.92)PAPGK	7	1.4278e-32	176.4	2	582.276	0.64948	+	-0.355483	-0.353165	-0.377124	3	-0.361924	0.0132146	0.0470471	-0.11294	-0.18309	-0.160048	3	-0.152026	0.0357562	0.226812
2851	Q8BZN6;E9QM99;Q8BZN6-2;Q8BZN6-3	1295;1295;1295;1295	S	Q8BZN6	S1295	Dedicator of cytokinesis protein 10	Dock10	TVNHADSRASLASLDSNPSTTEKSSEKTDNC	ASLASLDS(1)NPSTTEK	AS(-87.04)LAS(-36.9)LDS(35.79)NPS(-35.79)T(-46.18)T(-56.45)EK	8	3.64114e-97	199.75	2	800.859	-0.044641	+	0.28092	0.235806	0.262982	3	0.259903	0.0227139	0.129355	0.15525	0.194348	0.100814	3	0.150137	0.0469758	0.22734
270	Q7TMY8;Q7TMY8-3;A2AFQ0;Q7TMY8-4	3663;3663;3664;3663	S	Q7TMY8	S3663	E3 ubiquitin-protein ligase HUWE1	Huwe1	EYNLEQQRRAQCETLSPDGLPEEQPQTTKLK	AQCETLS(1)PDGLPEEQPQTTK	AQCET(-46.52)LS(46.52)PDGLPEEQPQT(-145.88)T(-149.1)K	7	1.98624e-143	199.37	2	1155	-0.25513	+	0.251663	0.319626	0.316926	3	0.296072	0.0384831	0.100608	0.106105	0.148109	0.148723	3	0.134312	0.0244302	0.228069
4543	P18654;B1AXN9	386;358	S	P18654	S386	Ribosomal protein S6 kinase alpha-3	Rps6ka3	GIPPSANAHQLFRGFSFVAITSDDESQAMQT	GFS(1)FVAITSDDESQAMQTVGVHSIVQQLHR	GFS(35.18)FVAIT(-35.18)S(-44.74)DDES(-73.52)QAMQT(-86.21)VGVHS(-94.85)IVQQLHR	3	1.32216e-33	96.708	4	842.65	1.5634	+	0.61099	0.406148	0.605216	3	0.540785	0.116634	0.0224031	0.0649868	0.124439	0.278808	3	0.156078	0.110366	0.229335
329	A2AI08	457	S	A2AI08	S457	Taperin	Tprn	AISDTDKCVRWQRPASPPPFLPATAEAEPAE	WQRPAS(1)PPPFLPATAEAEPAEGLGVPGLAK	WQRPAS(42.93)PPPFLPAT(-42.93)AEAEPAEGLGVPGLAK	6	5.65669e-07	95.646	3	1045.53	0.68232	+	0.0464561	0.182671	0.375017	3	0.201382	0.165078	0.296233	0.12275	0.0685569	0.241694	3	0.144333	0.0885635	0.229335
8031	Q80X50;Q80X50-2;Q80X50-4;Q80X50-3;Q80X50-5	376;387;376;356;381	S	Q80X50	S376	Ubiquitin-associated protein 2-like	Ubap2l	MLGKGFGDVGEAKGGSTTGSQFLEQFKTAQA	GGS(0.936)T(0.063)T(0.001)GSQFLEQFK	GGS(11.73)T(-11.73)T(-30.55)GS(-42.53)QFLEQFK	3	4.63712e-05	122.1	2	783.845	2.045	+	0.110556	0.0947506		2	0.102653	0.0111762	0.436622	0.152631	0.0849693		2	0.1188	0.047844	0.22958
6541	Q5SVR0;Q5SVR0-2	1254;1237	S	Q5SVR0	S1254	TBC1 domain family member 9B	Tbc1d9b	KIKDQKKVERQFSTSSDHEPPGVLG______	QFS(0.003)T(0.015)S(0.055)S(0.927)DHEPPGVLG	QFS(-25.23)T(-17.83)S(-12.25)S(12.25)DHEPPGVLG	6	0.000311652	104.16	2	819.346	-0.036	+		0.322715	0.418346	2	0.370531	0.0676212	0.0631146		0.0897639	0.184356	2	0.13706	0.0668866	0.23018
13706	Q8C156	43	T	Q8C156	T43	Condensin complex subunit 2	Ncaph	ERVPPASRPGKAPLGTPKTPVLEDFPQNDDE	APLGT(0.94)PKT(0.06)PVLEDFPQNDDEK	APLGT(11.91)PKT(-11.91)PVLEDFPQNDDEK	5	0.000243474	82.01	4	598.533	0.067281	+	0.314794	0.306339	0.291002	3	0.304045	0.0120609	0.095748	0.182977	0.0352696	0.632085	3	0.283444	0.310833	0.23018
2768	Q3UHX0;E9QKD1	723;741	S	Q3UHX0	S723	Nucleolar protein 8	Nol8	SPREDPQKSPAGFSLSDSNASCINAKDKQAE	VSPREDPQKS(0.017)PAGFS(0.047)LS(0.926)DS(0.009)NASCINAK	VS(-42.61)PREDPQKS(-17.24)PAGFS(-12.93)LS(12.93)DS(-19.95)NAS(-38.17)CINAK	17	9.30573e-06	98.684	4	736.339	0.2465	+	0.234619	0.279484		2	0.257051	0.031725	0.114268	0.133045	0.0950298		2	0.114038	0.0268811	0.23018
13635	Q8BS90;Q8BS90-2	247;247	T	Q8BS90	T247	Protein aurora borealis	Bora	PIQNSVKKYSLGSVTTSPSAISSPTFSPIAL	Y(0.001)S(0.002)LGS(0.001)VT(0.033)T(0.897)S(0.033)PS(0.033)AISSPTFSPIALQGGK	Y(-28.63)S(-27.58)LGS(-28.63)VT(-14.35)T(14.35)S(-14.35)PS(-14.35)AIS(-46.35)S(-56.39)PT(-81.49)FS(-97.45)PIALQGGK	8	7.90606e-140	188.26	3	911.784	1.8064	+	0.185117	0.363424	0.296176	3	0.281572	0.090046	0.117037	0.0673436	0.193792	0.184329	3	0.148488	0.0704325	0.23018
4093	O35601;O35601-2	203;203	S	O35601	S203	FYN-binding protein	Fyb	KPRFPRHTFGQKPSLSTEDSQEENTSKNVPV	HTFGQKPS(0.001)LS(0.986)T(0.013)EDSQEENTSK	HT(-75.35)FGQKPS(-30.51)LS(18.84)T(-18.84)EDS(-45.65)QEENT(-61.74)S(-72.55)K	10	3.80263e-10	123.54	3	810.687	0.80711	+	0.0564475	0.0834668	0.135803	3	0.0919059	0.0403455	0.56698	0.0874697	0.124048	0.189895	3	0.133804	0.0519051	0.23018
11012	Q9QY06;Q9QY06-2;Q9QY06-3;E9PZW8;E9QKV6;E9PWZ6	1175;1204;1175;1175;1175;1175	S	Q9QY06	S1175	Unconventional myosin-IXb	Myo9b	CREESSTHREPSRRASLEIGESFPEGTKGPR	RAS(1)LEIGESFPEGTK	RAS(69.46)LEIGES(-69.46)FPEGT(-103.96)K	3	0.00806909	105.19	3	567.601	0.5223	+	-0.0502539		0.121587	2	0.0356667	0.12151	0.928117	0.0715837		0.299097	2	0.185341	0.160876	0.23018
9181	Q8JZS6;Q8JZS6-2	35;35	S	Q8JZS6	S35	NEDD4-binding protein 2-like 2	N4bp2l2	EPCYKKLKSAADDGVSPLRGGPDIHRIQEKP	SAADDGVS(1)PLRGGPDIHR	S(-41.78)AADDGVS(41.78)PLRGGPDIHR	8	0.015822	72.428	4	475.723	1.0941	+	-0.179227	-0.2214	-0.353301	3	-0.251309	0.0908091	0.0948252	-0.101266	-0.161919	-0.260358	3	-0.174514	0.0802903	0.230491
5150	P59672;P59672-2;Q3UHP6	462;441;462	S	P59672	S462	Ankyrin repeat and SAM domain-containing protein 1A	Anks1a;Anks1	LAASEGLAVRPRIQSSAPQEEEEHPYELLLT	IQS(0.189)S(0.811)APQEEEEHPYELLLTAETK	IQS(-6.32)S(6.32)APQEEEEHPY(-51.35)ELLLT(-70.99)AET(-86.35)K	4	1.22367e-13	95.195	3	908.088	0.57029	+		0.623301	0.599462	2	0.611381	0.0168567	0.0136328		0.101128	0.166228	2	0.133678	0.0460328	0.231064
4191	O55098	437	S	O55098	S437	Serine/threonine-protein kinase 10	Stk10	QMDEEKQIPDQDENPSPAASKSQKANQSRPN	QIPDQDENPS(0.999)PAAS(0.001)K	QIPDQDENPS(31.08)PAAS(-31.08)K	10	0.000406851	91.64	2	838.862	-0.43635	+	0.193959	0.378816	0.35389	3	0.308888	0.100309	0.0969951	0.132332	0.148479	0.12339	3	0.134734	0.012716	0.231064
4935	P48972;A2A5P3	457;19	S	P48972	S457	Myb-related protein B	Mybl2	LTPKSTPVKTLPFSPSQFLNFWNKQDTLELE	TLPFS(0.036)PS(0.964)QFLNFWNK	T(-39.02)LPFS(-14.31)PS(14.31)QFLNFWNK	7	7.55502e-83	188.48	3	635.969	-2.9229	+	-0.430544		-0.406727	2	-0.418636	0.0168409	0.0261106	-0.185514		-0.0762398	2	-0.130877	0.0772684	0.231636
2216	E9Q3G8	697	S	E9Q3G8	S697		Nup153	LPLKETAKQTGTGTPSKSDKPASTSGTGFGD	QT(0.01)GT(0.01)GT(0.047)PS(0.885)KS(0.047)DKPASTSGTGFGDK	QT(-19.41)GT(-19.41)GT(-12.72)PS(12.72)KS(-12.72)DKPAS(-70.35)T(-75.11)S(-78.5)GT(-85.98)GFGDK	8	1.72811e-05	112.64	3	798.027	0.8573	+	-0.53059	-0.351904	-0.440027	3	-0.44084	0.0893462	0.0404291	-0.173798	-0.103369	-0.255248	3	-0.177472	0.0760063	0.231636
11898	E9PYT0;P97393	1218;1216	T	E9PYT0	T1218	Rho GTPase-activating protein 5	Arhgap5	SPVETWKGGIDNPAITSDQEVDDKKIKKKTH	GSEEDPLLS(0.001)PVET(0.036)WKGGIDNPAIT(0.754)S(0.209)DQEVDDKK	GS(-58.23)EEDPLLS(-30.74)PVET(-13.2)WKGGIDNPAIT(5.58)S(-5.58)DQEVDDKK	24	0.000616622	80.752	4	913.175	-1.7224	+	-0.411975		-0.281261	2	-0.346618	0.0924289	0.0443019	-0.0868579		-0.200467	2	-0.143663	0.0803341	0.231636
7582	Q6PR54;Q6PR54-3;Q6PR54-2	2121;2128;2121	S	Q6PR54	S2121	Telomere-associated protein RIF1	Rif1	VNESPSGMQQARCVWSPLASPSTSILKRGLK	CVWS(1)PLAS(0.997)PS(0.002)TSILK	CVWS(87.4)PLAS(26.08)PS(-26.08)T(-41.63)S(-41.63)ILK	4	1.6905e-81	193.64	3	602.603	0.84171	+	-0.374451	-0.336308	-0.35407	3	-0.354943	0.0190862	0.0480984	-0.134432	-0.162348	-0.131458	3	-0.142746	0.017041	0.231636
11561	A2APB8	72	T	A2APB8	T72	Targeting protein for Xklp2	Tpx2	GKNSLRKAKLQQGFVTPLKAVDNTYHKETEK	LQQGFVT(1)PLK	LQQGFVT(98)PLK	7	0.000317875	115.06	3	404.213	1.1968	+	-0.309786	-0.327662	-0.401176	3	-0.346208	0.0484357	0.0506871	-0.112538	-0.166955	-0.164085	3	-0.147859	0.0306228	0.231636
7298	Q6NV83;Q6NV83-2	67;67	S	Q6NV83	S67	U2 snRNP-associated SURP motif-containing protein	U2surp	KHNYRNESSRESLCDSPHQNLSRPLLENKLK	ESLCDS(1)PHQNLSRPLLENK	ES(-38.53)LCDS(38.53)PHQNLS(-44.4)RPLLENK	6	8.02476e-06	116	3	773.026	0.32386	+	-0.356745	-0.312498	-0.284589	3	-0.317944	0.036385	0.0537856	-0.124113	-0.146588	-0.160198	3	-0.143633	0.0182233	0.231636
11287	Q9Z277	204	S	Q9Z277	S204	Tyrosine-protein kinase BAZ1B	Baz1b	SINDRARRSPRKLPTSLKKGERKWAPPKFLP	KLPT(0.002)S(0.998)LK	KLPT(-26.66)S(26.66)LK	5	0.00393805	97.565	3	289.496	0.3031	+	-0.344545	-0.290332	-0.341533	3	-0.32547	0.0304679	0.0537856	-0.16835	-0.230866	-0.0730582	3	-0.157425	0.0794694	0.231636
12034	E9Q7G0;F6ZQA3	2085;732	T	E9Q7G0	T2085		Numa1	PRIATTTTGTATVATTPRAKGKVKH______	IATTTTGTATVAT(0.108)T(0.892)PRAK	IAT(-64.22)T(-59.55)T(-54.15)T(-62.21)GT(-49.58)AT(-51.95)VAT(-9.19)T(9.19)PRAK	14	3.21976e-07	140.56	3	614.65	-1.6643	+	-0.31215	-0.291103	-0.344805	3	-0.316019	0.027059	0.0547782	-0.155154	-0.12268	-0.171756	3	-0.149863	0.0249617	0.231636
5540	Q02053	24	S	Q02053	S24	Ubiquitin-like modifier-activating enzyme 1	Uba1	KRRVSGPDPKPGSNCSPAQSALSEVSSVPTN	VSGPDPKPGS(0.171)NCS(0.822)PAQS(0.005)ALS(0.002)EVSSVPTNGMAK	VS(-48.53)GPDPKPGS(-6.81)NCS(6.81)PAQS(-22.32)ALS(-27.34)EVS(-42.94)S(-47.53)VPT(-55.33)NGMAK	13	2.56808e-10	98.632	3	1079.49	-0.15024	+	-0.253576		-0.260525	2	-0.25705	0.00491336	0.0606483	-0.114144		-0.116707	2	-0.115426	0.00181273	0.231636
14394	Q9Z1N2	349	T	Q9Z1N2	T349	Origin recognition complex subunit 1	Orc1	IRNGLRSSVVPSGGLTPVYIRRKAKEQETHK	SSVVPSGGLT(1)PVYIR	S(-126.7)S(-125.84)VVPS(-74.36)GGLT(61.96)PVY(-61.96)IR	10	3.35574e-44	177.07	3	537.943	0.30385	+	-0.30183	-0.2382	-0.326868	3	-0.288966	0.0457124	0.0618307	-0.108057	-0.148301	-0.201015	3	-0.152458	0.0466178	0.231636
1509	Q8BM55;D3Z6S1	51;51	S	Q8BM55	S51	Transmembrane protein 214	Tmem214	RALGEANGVLKYDLSSPIQTTSTLYERGFEK	YDLS(0.186)S(0.797)PIQT(0.014)T(0.002)S(0.001)TLYERGFEK	Y(-34.77)DLS(-6.31)S(6.31)PIQT(-17.51)T(-27.09)S(-31.11)T(-34.85)LY(-37.77)ERGFEK	5	0.000669037	78.484	3	805.709	0.88318	+	-0.328531	-0.223342	-0.292034	3	-0.281303	0.0534091	0.0657528	-0.0904697	-0.206685	-0.172778	3	-0.156644	0.0597638	0.231636
11993	E9Q5C9	613	T	E9Q5C9	T613		Nolc1	ATTPQAKKVKLETPNTFPKRKKGERRASSPF	VKLET(1)PNT(1)FPK	VKLET(68.75)PNT(68.75)FPK	8	1.46499e-39	150.14	3	478.554	2.001	+	-0.256945	-0.252021	-0.278502	3	-0.26249	0.0140841	0.0729918	-0.13226	-0.162241	-0.124145	3	-0.139549	0.0200666	0.231636
7056	Q640M1;Q640M1-2	52;52	S	Q640M1	S52	U3 small nucleolar RNA-associated protein 14 homolog A	Utp14a	SDGERKHQKLLEAIGSLSGKNRWKLPERSEA	LLEAIGS(0.998)LS(0.002)GK	LLEAIGS(27.85)LS(-27.85)GK	7	1.68098e-05	134.4	2	584.305	1.0818	+	-0.30156	-0.243973	-0.240799	3	-0.262111	0.0342012	0.073071	-0.155063	-0.159724	-0.11227	3	-0.142352	0.0261563	0.231636
12605	P13405	834	T	P13405	T834	Retinoblastoma-associated protein	Rb1	TPRSRILVSIGESFGTSEKFQKINQMVCNSD	ILVSIGESFGT(0.95)S(0.05)EK	ILVS(-130.85)IGES(-52.64)FGT(12.79)S(-12.79)EK	11	2.52177e-178	233.57	2	773.874	-1.0147	+	-0.265873	-0.247306	-0.227553	3	-0.24691	0.0191631	0.0807594	-0.162325	-0.195922	-0.09128	3	-0.149842	0.0534262	0.231636
9314	Q8K352	110	S	Q8K352	S110	SAM and SH3 domain-containing protein 3	Sash3	ALSEEMGDTLEEGSASPTSPDCSLDSPGPEK	ALSEEMGDTLEEGS(0.001)AS(0.886)PT(0.048)S(0.063)PDCS(0.001)LDSPGPEK	ALS(-59.73)EEMGDT(-42.77)LEEGS(-28.41)AS(11.47)PT(-12.64)S(-11.47)PDCS(-30.69)LDS(-39.73)PGPEK	16	2.67044e-34	112.06	3	1091.78	0.98505	+	-0.197753	-0.24572	-0.335618	3	-0.259697	0.0699872	0.0851496	-0.0829289	-0.216976	-0.235124	3	-0.178343	0.0831278	0.231636
6975	Q62261	2337	S	Q62261	S2337	Spectrin beta chain, non-erythrocytic 1	Sptbn1	SSRAQTLPTSVVTITSESSPGKREKDKEKDK	AQTLPT(0.014)S(0.014)VVT(0.002)IT(0.07)S(0.76)ES(0.07)S(0.07)PGKREK	AQT(-42.94)LPT(-17.38)S(-17.38)VVT(-25.62)IT(-10.36)S(10.36)ES(-10.36)S(-10.36)PGKREK	13	1.17274e-10	139.74	3	799.407	-2.3229	+	-0.289037	-0.214748	-0.217931	3	-0.240572	0.0420018	0.0876929	-0.192372	-0.165465	-0.0880297	3	-0.148622	0.0541719	0.231636
449	Q923A8;A2AP92	417;417	S	Q923A8	S417		Map3k7	TAAYSKPKRGHRKTASFGNILDVPEIVISGN	KT(0.153)AS(0.847)FGNILDVPEIVISGNGQPR	KT(-7.44)AS(7.44)FGNILDVPEIVIS(-55.57)GNGQPR	4	8.62429e-126	203.74	4	623.819	-0.30497	+	-0.241815	-0.202379	-0.270772	3	-0.238322	0.0343298	0.0908695	-0.0960754	-0.22751	-0.143514	3	-0.1557	0.066559	0.231636
6935	Q61937;Q9DAY9;Q5SQB5;E9Q5T3	216;216;216;196	S	Q61937	S216	Nucleophosmin	Npm1;Gm5611	KNAQKSNQNGKDLKPSTPRSKGQESFKKQEK	DLKPS(0.974)T(0.026)PR	DLKPS(15.77)T(-15.77)PR	5	8.14837e-05	143.58	2	497.242	-1.2083	+	-0.0881449	-0.30536	-0.250298	3	-0.214601	0.112922	0.137551	-0.115211	-0.162292	-0.155184	3	-0.144229	0.0253803	0.231636
2514	E9Q7G0;F6ZQA3	1816;463	S	E9Q7G0	S1816		Numa1	MTKKLELEEPDSANSSFYSTQSAPASQANLR	KLELEEPDS(0.025)ANS(0.065)S(0.765)FY(0.074)S(0.029)T(0.029)QS(0.012)APAS(0.001)QANLR	KLELEEPDS(-14.8)ANS(-10.68)S(10.14)FY(-10.14)S(-14.23)T(-14.23)QS(-17.95)APAS(-31.53)QANLR	13	1.12622e-20	112.42	3	1040.81	-1.5597	+	-0.484948	-0.0985253		2	-0.291737	0.273242	0.146154	-0.295325	-0.124181		2	-0.209753	0.121017	0.231636
823	Q6ZPJ0;B1ATR2	294;294	S	Q6ZPJ0	S294	Testis-expressed sequence 2 protein	Tex2	VPEMEAKIEDTKRRLSEVIYEPFQLLSKIIG	RRLS(1)EVIYEPFQLLSK	RRLS(59.36)EVIY(-59.36)EPFQLLS(-115.16)K	4	8.4555e-05	130.4	3	686.698	-0.35859	+	-0.140447	-0.0641805	-0.0557987	3	-0.0868089	0.046641	0.37273	-0.10995	-0.169386	-0.161458	3	-0.146931	0.0322712	0.231636
10284	Q9CW46	652	S	Q9CW46	S652	Ribonucleoprotein PTB-binding 1	Raver1	SGGGSGGPLSHFYSGSPTSYFTSGLQAGLKQ	SGGGSGGPLSHFYS(0.004)GS(0.994)PT(0.002)S(0.001)YFTSGLQAGLK	S(-104.35)GGGS(-96.54)GGPLS(-71.62)HFY(-50.58)S(-24.13)GS(24.13)PT(-27.11)S(-32.39)Y(-58.65)FT(-55)S(-53.54)GLQAGLK	16	1.33718e-49	139.01	3	995.454	-0.92994	+	-0.454755	0.0891276	-0.373335	3	-0.246321	0.293345	0.478573	-0.229221	-0.13766	-0.104897	3	-0.157259	0.0644378	0.231636
11890	E9PYH6	1174	T	E9PYH6	T1174		Setd1a	SSPIPLLPPPKKRRKTVSFSAAEEAPVPEPS	T(0.782)VS(0.109)FS(0.109)AAEEAPVPEPSTAAPLQAK	T(8.56)VS(-8.56)FS(-8.56)AAEEAPVPEPS(-94.94)T(-98.19)AAPLQAK	1	4.73049e-216	218	3	826.732	-0.55804	+	0.19432	0.147367	0.00926167	3	0.116983	0.096198	0.573214	-0.146717	-0.215076	-0.0871423	3	-0.149645	0.0640172	0.231636
8013	Q80WQ6	295	S	Q80WQ6	S295	Inactive rhomboid protein 2	Rhbdf2	PPLSASYFRGVPHSASPVSPDGVHIPLKEYS	GVPHS(1)AS(1)PVS(1)PDGVHIPLK	GVPHS(71.95)AS(71.95)PVS(71.95)PDGVHIPLK	7	4.98888e-09	132.36	3	711.977	-0.5664	+	-0.135631	0.0482475	-0.158483	3	-0.0819556	0.113337	0.591971	-0.28312	-0.136612	-0.101369	3	-0.1737	0.0963849	0.231636
2721	Q6PDQ2;E9QAS4;E9QAS5;F6WR45	1530;1517;1537;417	S	Q6PDQ2	S1530	Chromodomain-helicase-DNA-binding protein 4	Chd4	AEVEENKKMSQPGSPSPKTPTPSTPGDTQPN	KMSQPGS(0.015)PS(0.985)PK	KMS(-42.47)QPGS(-18.09)PS(18.09)PK	9	5.37609e-11	160.63	2	612.278	-0.15067	+	-0.39882	0.102571		2	-0.148125	0.354537	0.786657	-0.102639	-0.299591		2	-0.201115	0.139265	0.231636
12188	Q58A65;F6SH61;Q58A65-6;Q58A65-2;Q58A65-3;F6WNT4;F8WH31;E9PUD1;Q58A65-4;Q58A65-5	217;53;52;217;74;74;74;74;74;217	T	Q58A65	T217	C-Jun-amino-terminal kinase-interacting protein 4	Spag9	ISLGIFPLPAGDGLLTPDTQKGGETPGSEQW	ERPISLGIFPLPAGDGLLT(0.999)PDT(0.001)QK	ERPIS(-128.58)LGIFPLPAGDGLLT(30.97)PDT(-30.97)QK	19	9.79028e-56	178.66	3	872.454	0.41624	+	0.434569	0.411182	0.459871	3	0.435207	0.0243508	0.0364373	0.12852	0.0532321	0.321664	3	0.167805	0.138461	0.231993
6028	Q3UHJ0;Q3UHJ0-2	635;554	S	Q3UHJ0	S635	AP2-associated protein kinase 1	Aak1	PSSPKTQRAGHRRILSDVTHSAVFGVPASKS	ILS(0.986)DVT(0.014)HSAVFGVPASK	ILS(18.37)DVT(-18.37)HS(-42.31)AVFGVPAS(-100.9)K	3	8.94051e-46	168.3	2	904.453	-0.19181	+	-0.211747	-0.270916	-0.129883	3	-0.204182	0.0708202	0.116136	-0.0907869	-0.19129	-0.182415	3	-0.15483	0.0556405	0.232962
5515	P99027	16	S	P99027	S16	60S acidic ribosomal protein P2	Rplp2	MRYVASYLLAALGGNSSPSAKDIKKILDSVG	MRYVASYLLAALGGNS(0.866)S(0.132)PS(0.002)AK	MRY(-148.6)VAS(-142.98)Y(-145.63)LLAALGGNS(8.17)S(-8.17)PS(-26.07)AK	16	6.12024e-18	162.11	3	751.364	-0.5383	+	-0.13489	-0.136041	-0.560481	3	-0.277137	0.245383	0.136849	-0.143046	-0.0986016	-0.430704	3	-0.224117	0.180284	0.233427
6289	Q4VA53;Q4VA53-3;F8WHU5;Q4VA53-2	1177;1177;1177;648	S	Q4VA53	S1177	Sister chromatid cohesion protein PDS5 homolog B	Pds5b	SNPSSPGRIKGRLDSSEMDHSENEDYTMSSP	GRLDS(0.841)S(0.973)EMDHS(0.155)ENEDY(0.005)T(0.012)MS(0.005)S(0.009)PLPGK	GRLDS(7.88)S(17.24)EMDHS(-7.88)ENEDY(-26.15)T(-20.88)MS(-24.87)S(-21.37)PLPGK	6	0.00611935	62.781	3	981.38	-0.36938	+	-0.394339	-0.355325	-0.332176	3	-0.360613	0.0314174	0.0470471	-0.120245	-0.186346	-0.113241	3	-0.139944	0.0403374	0.233895
14067	Q99N57;Q99N57-2	641;661	T	Q99N57	T641	RAF proto-oncogene serine/threonine-protein kinase	Raf1	HRAAHTEDINACTLTTSPRLPVF________	AAHTEDINACTLTT(0.995)S(0.005)PRLPVF	AAHT(-138.86)EDINACT(-56.56)LT(-35.34)T(23.17)S(-23.17)PRLPVF	14	1.18947e-41	175.74	2	1197.56	0.51664	+	0.643739	0.422639	0.402513	3	0.48963	0.133841	0.0327705	0.0773576	0.181729	0.164449	3	0.141179	0.0559419	0.234096
772	E9QA63;B1ARU4;E9PVY8;Q9QXZ0;Q9QXZ0-4;F6Q750;Q9QXZ0-3;Q9QXZ0-2;F7ACR9;E9QNP1;F6XCT0;F6SHS0	1376;1376;1376;1376;1527;508;1319;1376;1282;1527;1334;1527	S	E9QA63	S1376	Microtubule-actin cross-linking factor 1	Macf1	VESQQKSPGKRRRMISSSDAITQEFMDLRTR	MIS(0.979)S(0.021)SDAITQEFMDLR	MIS(16.75)S(-16.75)S(-38.52)DAIT(-84.64)QEFMDLR	3	6.47418e-21	146.6	2	962.415	-0.91194	+	0.427681	0.239299		2	0.33349	0.133206	0.0812486	0.0752608	0.190051		2	0.132656	0.0811692	0.234301
6605	Q5U4H9	507	S	Q5U4H9	S507		Ncoa4	ARIADSFHVIKNSSLSEWLMGPTCKGGPKDV	NS(0.094)S(0.094)LS(0.812)EWLMGPTCK	NS(-9.36)S(-9.36)LS(9.36)EWLMGPT(-70.84)CK	5	1.70673e-19	147.96	3	563.905	-0.59228	+	-0.234697	0.0135113		2	-0.110593	0.17551	0.596744	0.140423	0.0893045		2	0.114864	0.0361466	0.234301
961	B2RT41	356	S	B2RT41	S356		Zfc3h1	SQGLEDKEQNLTRRLSASDIVSEKKLGEEEE	RLS(0.993)AS(0.003)DIVS(0.004)EK	RLS(23.87)AS(-25.74)DIVS(-23.87)EK	3	7.88265e-05	113.38	2	642.813	-0.44299	+	0.495336	0.564855	0.499942	3	0.520045	0.0388756	0.0230765	0.150728	0.128302	0.121593	3	0.133541	0.0152576	0.235726
8499	Q8BT07;Q8BT07-2	426;425	S	Q8BT07	S426	Centrosomal protein of 55 kDa	Cep55	LQREPESRVKATSPKSPSAALNDSLVECPKC	AT(0.115)S(0.883)PKS(0.998)PS(0.004)AALNDSLVECPK	AT(-8.87)S(8.87)PKS(27.43)PS(-26.31)AALNDS(-80.16)LVECPK	6	5.38012e-10	140.51	3	744.66	0.66226	+	0.536129	0.376486	0.377869	3	0.430161	0.0917734	0.0433354	0.100699	0.11237	0.17575	3	0.129607	0.0403854	0.236226
13946	Q8VDZ4;Q8VDZ4-2	348;348	T	Q8VDZ4	T348	Palmitoyltransferase ZDHHC5	Zdhhc5	ATNEDSSLLGKDSPPTPTMYKYRPGYSSSST	DSPPT(0.997)PT(0.003)MYK	DS(-68.72)PPT(25.41)PT(-25.41)MY(-64.87)K	5	0.00420609	136.93	2	608.751	0.003908	+	0.0883488	0.165867	-0.185429	3	0.0229291	0.184559	0.990935	0.102038	0.0757294	0.255261	3	0.144343	0.0969547	0.236226
13340	Q6A0A9	386	T	Q6A0A9	T386	Constitutive coactivator of PPAR-gamma-like protein 1	FAM120A	LQAKPAVPQVPSPGGTPGQAPYPYSLSEPAL	PAVPQVPS(0.119)PGGT(0.881)PGQAPYPYSLSEPALTLDTSGK	PAVPQVPS(-8.71)PGGT(8.71)PGQAPY(-45.79)PY(-71.68)S(-75.51)LS(-83.72)EPALT(-89.73)LDT(-98.63)S(-100.2)GK	12	2.15598e-45	115.69	3	1153.9	1.4887	+	0.247286	0.234112	0.35086	3	0.277419	0.0639417	0.114268	0.0508589	0.167199	0.266041	3	0.161366	0.107709	0.236771
1981	E9PYZ7;Q6NZN0;E9PUF4;Q6NZN0-5;E9Q640;Q6NZN0-3;Q6NZN0-4;Q6NZN0-2	621;621;616;621;621;616;616;621	S	E9PYZ7	S621	RNA-binding protein 26	Rbm26	VYWHREGTTQQLQTTSPKPLVQQPILPVVKQ	EGTT(0.001)QQLQTT(0.002)S(0.996)PK	EGT(-34.32)T(-28.26)QQLQT(-42.38)T(-27.21)S(27.21)PK	11	5.78102e-06	127.07	2	749.843	-0.042388	+	0.135133	0.252586	0.0819644	3	0.156561	0.0873059	0.350759	0.0917241	0.115544	0.183215	3	0.130161	0.0474648	0.237907
76	Q8R568;A2A6Q5;A2A6Q5-2;A2A6Q5-3	241;241;241;241	S	Q8R568	S241	Cell division cycle protein 27 homolog	Cdc27	LNTDSSVSYIDSTVISPDNVPLGPGTAILSK	YSLNTDSSVSYIDS(0.002)T(0.006)VIS(0.791)PDNVPLGPGT(0.172)AILS(0.027)K	Y(-40.5)S(-34.3)LNT(-33.98)DS(-33.98)S(-33.65)VS(-32.62)Y(-32.8)IDS(-25.5)T(-21.44)VIS(6.63)PDNVPLGPGT(-6.63)AILS(-14.61)K	18	0.00460103	46.247	3	1164.23	0.16038	+	0.233605	0.458154		2	0.34588	0.15878	0.0739387	0.0625022	0.367803		2	0.215153	0.21588	0.239341
274	Q7TMY8;Q7TMY8-3;A2AFQ0;Q7TMY8-4	3753;3753;3754;3753	S	Q7TMY8	S3753	E3 ubiquitin-protein ligase HUWE1	Huwe1	TRRANKKAKQTGRLGSSGLGSASSIQAAVRQ	LGS(0.994)S(0.006)GLGSASSIQAAVR	LGS(22.34)S(-22.34)GLGS(-73.28)AS(-79.71)S(-89.22)IQAAVR	3	2.69818e-29	159.72	2	820.904	0.43512	+	0.402674		0.405873	2	0.404273	0.00226187	0.0486297	0.185459		0.125066	2	0.155263	0.0427045	0.240054
7953	Q80U93	660	S	Q80U93	S660	Nuclear pore complex protein Nup214	Nup214	STQTAPSSAPSTGQKSPRVNPPVPKSGSSQA	STQTAPSSAPSTGQKS(0.999)PRVNPPVPK	S(-70.18)T(-70.18)QT(-62.65)APS(-36.59)S(-36.59)APS(-44.8)T(-44.8)GQKS(36.59)PRVNPPVPK	16	0.000101735	96.579	3	867.101	0.66129	+	0.262831	0.304383	0.310185	3	0.292466	0.0258286	0.102248	0.100398	0.189687	0.128491	3	0.139525	0.0456555	0.240054
10954	Q9JLQ0	404	S	Q9JLQ0	S404	CD2-associated protein	Cd2ap	PKKPTAPTKASNLLRSPGAVYPKRPEKPVPP	ASNLLRS(1)PGAVYPK	AS(-37.57)NLLRS(37.57)PGAVY(-50.74)PK	7	0.000442153	102.03	3	518.268	-0.87466	+	0.190528	0.211761	0.205582	3	0.202624	0.0109214	0.199699	0.0988906	0.137765	0.1526	3	0.129752	0.027737	0.240054
4562	P20065-2;P20065	31;37	S	P20065-2	S31	Thymosin beta-4;Hematopoietic system regulatory peptide	Tmsb4x	SKLKKTETQEKNPLPSKETIEQEKQAGES__	NPLPS(0.999)KET(0.001)IEQEK	NPLPS(29.95)KET(-29.95)IEQEK	5	0.00931466	72.898	3	531.59	2.1727	+	0.128302	0.238071	0.203634	3	0.190002	0.0561397	0.227898	0.111444	0.0829289	0.200108	3	0.131494	0.0611084	0.240054
9448	Q8R1Q8	516	S	Q8R1Q8	S516	Cytoplasmic dynein 1 light intermediate chain 1	Dync1li1	RITRKPASVSPTTPTSPTEGEAS________	KPASVSPTTPT(0.009)S(0.86)PT(0.075)EGEAS(0.056)	KPAS(-87.69)VS(-72.74)PT(-47.85)T(-34.73)PT(-19.74)S(10.62)PT(-10.62)EGEAS(-11.88)	12	8.07615e-57	184.97	2	962.433	-0.47472	+	0.39275	0.370161	0.424697	3	0.395869	0.0274012	0.0477028	0.133346	0.11133	0.140058	3	0.128245	0.0150281	0.240208
1705	Q8K4R9;Q8K4R9-2;E9PUT4;Q8K4R9-3	598;598;598;598	S	Q8K4R9	S598	Disks large-associated protein 5	Dlgap5	EVDKIVFDAGFFRIESPVKSFSVLSSERRSQ	IVFDAGFFRIES(1)PVK	IVFDAGFFRIES(66.94)PVK	12	0.00396981	108.13	3	602.306	0.13285	+	-0.388457	-0.360265	-0.463071	3	-0.403931	0.0531215	0.0430854	-0.14217	-0.15859	-0.110186	3	-0.136982	0.024616	0.241363
4465	P13864	125	S	P13864	S125	DNA (cytosine-5)-methyltransferase 1	Dnmt1	GSRPTWRAEMADSNRSPRSRPKPRGPRRSKS	AEMADSNRS(1)PR	AEMADS(-40.18)NRS(40.18)PR	9	0.00783315	95.755	3	438.515	-3.4581	+	-0.180976	-0.146387		2	-0.163682	0.0244583	0.187055	-0.10704	-0.225023		2	-0.166032	0.0834267	0.241363
7257	Q6DVA0	507	S	Q6DVA0	S507	LEM domain-containing protein 2	Lemd2	GEDMLVWRWTKPSSFSDSER___________	WTKPSSFS(0.999)DS(0.001)ER	WT(-107.08)KPS(-48.74)S(-48.74)FS(30.59)DS(-30.59)ER	8	1.61147e-46	193.54	2	753.817	-0.63784	+	0.0713296	0.114511	0.345313	3	0.177051	0.14731	0.311808	0.107416	0.0632207	0.29713	3	0.155922	0.12427	0.241704
13735	Q9JHK5;Q8CAG6	123;100	T	Q9JHK5	T123	Pleckstrin	Plek	KFARKSTRRSIRLPETIDLGALYLSMKDPEK	S(0.092)IRLPET(0.908)IDLGALYLSMKDPEK	S(-9.97)IRLPET(9.97)IDLGALY(-44.24)LS(-55.82)MKDPEK	7	0.000271126	92.39	4	643.08	0.19319	+	0.064046	0.0985053	0.199056	3	0.120536	0.0701495	0.445537	0.162746	0.211254	0.090765	3	0.154922	0.0606244	0.241704
2924	Q9JLC8;Q9JLC8-2;Q9JLC8-3;E9QNY8	1781;1029;1778;1781	S	Q9JLC8	S1781	Sacsin	Sacs	VEEFHHVFRRIADLQSPLFRGPDDDPATLFE	IADLQS(1)PLFRGPDDDPATLFEMAK	IADLQS(58.2)PLFRGPDDDPAT(-58.2)LFEMAK	6	0.000118335	81.406	3	909.763	-2.8719	+	0.529058	0.487746		2	0.508402	0.0292118	0.0229732	0.0649565	0.238999	0.167593	3	0.157183	0.087487	0.241817
6505	Q5SNZ0;Q5SNZ0-3;Q5SNZ0-2;F6R1B7	1562;1479;1534;515	S	Q5SNZ0	S1562	Girdin	Ccdc88a	AAFRSKQLVNNKDTTSFEDISPQGISDDSST	QLVNNKDT(0.015)T(0.085)S(0.896)FEDIS(0.003)PQGISDDSSTGSR	QLVNNKDT(-17.81)T(-10.21)S(10.21)FEDIS(-25.11)PQGIS(-35.33)DDS(-39)S(-39)T(-45.32)GS(-47.69)R	10	4.946e-11	110.36	3	1026.79	1.4399	+	0.309864	0.286299	0.295652	3	0.297272	0.0118657	0.0992998	0.119873	0.149465	0.125501	3	0.131613	0.0157147	0.241817
9896	Q921Q7	198	S	Q921Q7	S198	Ras and Rab interactor 1	Rin1	QRPSEAPPIPRLKARSPQELDQGTGAALCFF	ARS(1)PQELDQGTGAALCFFNPLFPGDLGPTKR	ARS(33.09)PQELDQGT(-33.09)GAALCFFNPLFPGDLGPT(-96.2)KR	3	1.7763e-07	103.71	4	860.917	1.0959	+	0.470807	0.462533	0.41481	3	0.449383	0.0302258	0.0364366	0.128731	0.104111	0.148656	3	0.127166	0.0223135	0.241973
402	P70279;A2ALA0	97;97	S	P70279	S97	Surfeit locus protein 6	Surf6	NPMVSKQEKGLSSLGSPKDSQGTARESVFAL	GLS(0.004)S(0.016)LGS(0.979)PKDSQGTAR	GLS(-24.06)S(-17.74)LGS(17.74)PKDS(-35.18)QGT(-33.85)AR	7	0.000186213	126.12	3	547.593	1.4654	+	0.136118	0.141136	0.136749	3	0.138001	0.00273347	0.348026	0.100409	0.11237	0.170208	3	0.127662	0.0373274	0.242723
10015	Q99K73	527	S	Q99K73	S527		Nrf1	AYVVEDGDIIFFKFNSPQQLKKK________	FNS(1)PQQLK	FNS(105.25)PQQLK	3	0.000805999	121.29	2	521.242	-0.063782	+	-0.391709	-0.245354	-0.259427	3	-0.29883	0.0807432	0.0601295	-0.172428	-0.135744	-0.112236	3	-0.140136	0.0303352	0.242748
1535	Q9QXK2;D3Z734;D3Z733;E9Q392	99;99;99;99	S	Q9QXK2	S99	E3 ubiquitin-protein ligase RAD18	Rad18	SMNFARTHLLQFALESPPISPVSSTSKKVVV	THLLQFALES(1)PPISPVSSTSK	T(-84.27)HLLQFALES(76.35)PPIS(-76.35)PVS(-107.48)S(-112.94)T(-118.29)S(-123.5)K	10	8.16924e-86	178.91	3	773.726	0.40351	+	-0.29203	-0.221003	-0.329276	3	-0.280769	0.0550078	0.0691452	-0.147491	-0.123442	-0.152472	3	-0.141135	0.0155238	0.242748
7468	Q6PCL9	719	S	Q6PCL9	S719	Poly(A) polymerase gamma	Papolg	ARKKRLPSKELPDSSSPVPANNIRVIKNSIR	ELPDS(0.004)S(0.027)S(0.969)PVPANNIR	ELPDS(-23.87)S(-15.5)S(15.5)PVPANNIR	7	7.70258e-44	171.52	2	838.388	-0.69492	+	-0.347976		-0.514601	2	-0.431289	0.117821	0.032844	-0.0819231		-0.202161	2	-0.142042	0.0850212	0.244103
6204	Q3UZA1;Q3UZA1-2	83;53	S	Q3UZA1	S83	CapZ-interacting protein	Rcsd1	SPSGASHPPKIKVKSSPLIEKLQANLAFDPA	VKSS(1)PLIEK	VKS(-35.01)S(35.01)PLIEK	4	7.9347e-05	152.96	2	540.789	-1.0598	+	0.535712	0.490689	0.527448	3	0.51795	0.0239674	0.0229732	0.103656	0.110388	0.167414	3	0.127153	0.0350299	0.245418
2900	Q9QXS1-3;E9QMZ5;Q9QXS1-6;E9Q3W4;Q9QXS1-15;Q9QXS1-10;E9Q153;Q9QXS1-9;Q9QXS1-12;E9QKX4;Q9QXS1-11;Q9QXS1-13;E9QLJ5;Q9QXS1-5;E9PY96;Q9QXS1-16;Q9QXS1-4;E9QL05;Q9QXS1-14;E9QQ00;Q9QXS1-7;Q9QXS1-8;E9QK43;Q9QXS1;Q9QXS1-2;E9QPE8;E9QN87	4245;4245;4274;4088;4151;4213;4213;4218;4223;4223;4228;4236;4236;4245;4245;4246;4250;4250;4252;4252;4279;4291;4291;4393;4388;4388;4393	S	Q9QXS1-3;Q9QXS1	S4245	Plectin	Plec	DMLSGNAGGFRSRSSSVGSSSSYPISSAGPR	SS(0.001)S(0.999)VGSSSSYPISSAGPR	S(-57.49)S(-30.15)S(30.15)VGS(-54.91)S(-69.3)S(-76.91)S(-82.01)Y(-159.5)PIS(-132.13)S(-143.03)AGPR	3	3.81727e-103	198.05	2	896.891	-0.69197	+	0.194598	0.235554	0.255472	3	0.228541	0.0310373	0.162072	0.158634	0.159928	0.100442	3	0.139668	0.0339769	0.245418
8777	Q8C0T5;Q8C0T5-2	176;176	S	Q8C0T5	S176	Signal-induced proliferation-associated 1-like protein 1	Sipa1l1	SSPRKALRRIRQRSNSDITISELDVDSFDEC	QRS(0.092)NS(0.849)DIT(0.047)IS(0.012)ELDVDSFDECISPTYK	QRS(-9.63)NS(9.63)DIT(-12.57)IS(-18.51)ELDVDS(-56.9)FDECIS(-76.5)PT(-84.07)Y(-87.57)K	5	1.03416e-42	142.01	3	1033.79	1.1877	+	-0.356607	-0.17105		2	-0.263828	0.131208	0.102934	-0.159748	-0.144469		2	-0.152108	0.0108038	0.246783
12070	P54103;E9Q9H3;Q3TRX6	48;48;48	T	P54103	T48	DnaJ homolog subfamily C member 2	Dnajc2	RWFEAFVKRRNRNASTSFQELEDKKELSEES	NAS(0.01)T(0.835)S(0.154)FQELEDKK	NAS(-19.05)T(7.34)S(-7.34)FQELEDKK	4	0.000270214	97.214	3	526.235	0.042356	+	-0.557019	-0.636501		2	-0.59676	0.0562023	0.0150578	-0.118595	-0.185939		2	-0.152267	0.0476191	0.246916
12096	E9QB02;F6W0G8;Q68FL6	903;177;895	T	E9QB02;Q68FL6	T903	Methionine--tRNA ligase, cytoplasmic	Mars	DLKKQLALAEGKPIETPKGKKKK________	QLALAEGKPIET(1)PK	QLALAEGKPIET(60.9)PK	12	0.0148532	71.402	3	525.611	1.3943	+	-0.396444	-0.351445	-0.415824	3	-0.387905	0.0330284	0.0443019	-0.135196	-0.147435	-0.118529	3	-0.13372	0.0145091	0.246916
11710	F6YTL8;D3YWX2;Q9R0I7;E9Q803	274;732;685;732	T	F6YTL8	T274	YLP motif-containing protein 1	Ylpm1	GESSALSQSIIAAKDTPVKSGGLLADPPKGS	VFSSEQGLGESSALSQSIIAAKDT(1)PVK	VFS(-123.73)S(-123.73)EQGLGES(-89.59)S(-73.32)ALS(-41.14)QS(-35.51)IIAAKDT(35.51)PVK	24	5.4219e-24	129.77	4	708.103	-0.77789	+	-0.375862	-0.33711	-0.36442	3	-0.359131	0.0199102	0.0478236	-0.137196	-0.262314	-0.0701118	3	-0.156541	0.0975507	0.246916
4468	P13864;P13864-2	142;24	S	P13864	S142	DNA (cytosine-5)-methyltransferase 1	Dnmt1	RSRPKPRGPRRSKSDSDTLSVETSPSSVATR	SKS(0.016)DS(0.915)DT(0.062)LS(0.006)VETSPSSVATR	S(-40.62)KS(-17.47)DS(11.7)DT(-11.7)LS(-21.74)VET(-35.05)S(-45.73)PS(-48.91)S(-41.29)VAT(-47.34)R	5	4.33274e-164	230.79	2	1067.48	3.2648	+	0.529097	0.518882	0.510956	3	0.519645	0.00909427	0.0229732	0.105933	0.112136	0.162405	3	0.126825	0.0309693	0.247884
11005	Q9QY06;Q9QY06-2;E9PZW8	1988;2017;2002	S	Q9QY06	S1988	Unconventional myosin-IXb	Myo9b	GAVEGPPAPALPCPISPTLSPLPEAAAPPRG	GAVEGPPAPALPCPIS(0.987)PT(0.009)LS(0.005)PLPEAAAPPR	GAVEGPPAPALPCPIS(20.56)PT(-20.56)LS(-23.2)PLPEAAAPPR	16	1.10755e-40	116.7	2	1505.76	1.6523	+	0.500771	0.332963	0.595132	3	0.476289	0.132788	0.0327627	0.115256	0.103735	0.159499	3	0.126163	0.0294384	0.247884
11176	Q9WUU9	1717	S	Q9WUU9	S1717	80 kDa MCM3-associated protein	Mcm3ap	VENLLCRTYQKWKNKSLSPGQELGPSVAEIP	S(0.781)LS(0.219)PGQELGPSVAEIPWDDIITLCINHK	S(5.53)LS(-5.53)PGQELGPS(-53.64)VAEIPWDDIIT(-115.78)LCINHK	1	9.37351e-61	138.93	3	1057.18	0.9383	+	0.255923	0.231775		2	0.243849	0.0170753	0.128108	0.162904	0.0746702		2	0.118787	0.0623909	0.247884
10828	Q9ESC8	689	S	Q9ESC8	S689	AF4/FMR2 family member 4	Aff4	SSVEEEDSFFRQRMFSPMEEKELLSPLSEPD	MFS(1)PMEEK	MFS(78.49)PMEEK	3	0.00490232	97.734	2	539.703	-0.34873	+	0.0382624	0.246745	0.56309	3	0.282699	0.264255	0.233133	0.159054	0.0402066	0.299357	3	0.166206	0.129723	0.248241
9447	Q8R1Q8	510	S	Q8R1Q8	S510	Cytoplasmic dynein 1 light intermediate chain 1	Dync1li1	VHAELDRITRKPASVSPTTPTSPTEGEAS__	KPAS(0.003)VS(0.892)PT(0.052)T(0.052)PTSPTEGEAS	KPAS(-24.28)VS(12.33)PT(-12.33)T(-12.33)PT(-37.71)S(-47.43)PT(-73.95)EGEAS(-87.37)	6	1.59263e-08	135.31	2	962.433	0.6076	+	-0.306774	-0.224856	-0.234922	3	-0.255517	0.0446743	0.0781951	-0.135769	-0.137344	-0.128851	3	-0.133988	0.00451759	0.248285
12090	Q3UIA2;E9QAJ9;Q3UIA2-2;Q3UIA2-4;Q3UIA2-3	740;740;662;662;662	T	Q3UIA2	T740	Rho GTPase-activating protein 17	Arhgap17	PEPGPTPPQTPTPPSTPPLAKQNPSQSETTQ	LGEQGPEPGPTPPQTPT(1)PPS(0.036)T(0.964)PPLAK	LGEQGPEPGPT(-88.25)PPQT(-42.01)PT(42.01)PPS(-14.32)T(14.32)PPLAK	21	8.46244e-44	150.86	3	917.761	-0.88956	+	-0.369562	-0.33628	-0.346861	3	-0.350901	0.0170047	0.0488345	-0.157517	-0.128281	-0.121855	3	-0.135885	0.019008	0.248314
12760	P48754	1199	T	P48754	T1199	Breast cancer type 1 susceptibility protein homolog	Brca1	EDLPCFQHLLSRISNTPELTRCSSAVTQRMP	IS(0.001)NT(0.999)PELTR	IS(-32.46)NT(32.46)PELT(-46.46)R	4	0.00661871	101.72	2	555.763	0.43983	+	-0.350305	-0.243996	-0.411788	3	-0.335363	0.0848883	0.0544149	-0.161967	-0.0934172	-0.20607	3	-0.153818	0.0567667	0.248314
1815	E9PVX6	1895	S	E9PVX6	S1895		Mki67	AIMETPKQKLDFIGNSTGHKRRPRTPKNRAQ	QKLDFIGNS(1)T(1)GHK	QKLDFIGNS(76.34)T(76.34)GHK	9	0.00230474	86.016	3	535.567	-0.56288	+	-0.328642	-0.254465	-0.383097	3	-0.322068	0.0645677	0.0547782	-0.183498	-0.0884695	-0.207877	3	-0.159948	0.0630908	0.248314
5795	Q3TUF7-3;Q3TUF7;Q3TUF7-2	411;464;464	S	Q3TUF7-3	S411	YEATS domain-containing protein 2	Yeats2	KSFQPITMSCKIVSGSPISTPSPSPLPRTPT	IVSGS(1)PISTPSPSPLPR	IVS(-34.36)GS(34.36)PIS(-44.34)T(-44.34)PS(-56.54)PS(-68.55)PLPR	5	1.16348e-85	191.97	2	886.453	1.7246	+	-0.322165	-0.269856	-0.280146	3	-0.290722	0.027712	0.0603289	-0.126586	-0.122151	-0.164026	3	-0.137587	0.0230032	0.248314
7594	Q6PR54;Q6PR54-3;Q6PR54-2	1029;1036;1029	S	Q6PR54	S1029	Telomere-associated protein RIF1	Rif1	KKKVKLSAKLKLESSSPKIKSGKLLEEEKST	LKLESS(0.006)S(0.993)PK	LKLES(-38.02)S(-21.94)S(21.94)PK	7	0.0160485	77.674	2	534.77	-1.9244	+	-0.30264	-0.242551	-0.273071	3	-0.272754	0.0300458	0.067708	-0.151768	-0.106532	-0.179925	3	-0.146075	0.0370261	0.248314
10994	Q9QXM1;Q9QXM1-3	884;865	S	Q9QXM1	S884	Junction-mediating and -regulatory protein	Jmy	KLRKTVEGLQRRRVSSPMDEVLASLKRGSFH	RRVS(0.112)S(0.888)PMDEVLASLK	RRVS(-8.97)S(8.97)PMDEVLAS(-84.06)LK	5	0.000307807	106.42	3	589.966	1.9964	+	-0.238591	-0.304326	-0.2093	3	-0.250739	0.0486635	0.0780856	-0.133411	-0.191445	-0.0855046	3	-0.136787	0.0530506	0.248314
3901	Q9D4G9;J3KMH2	225;225	S	Q9D4G9	S225	RecQ-mediated genome instability protein 1	Rmi1;Gm20775	LIGELDPTVPVIPNNSIHNVPKVSGGLDAVL	LIGELDPTVPVIPNNS(1)IHNVPK	LIGELDPT(-44.28)VPVIPNNS(44.28)IHNVPK	16	0.00183093	68.168	3	816.096	0.12047	+	-0.201411	-0.37368		2	-0.287546	0.121812	0.0805274	-0.0807707	-0.440668		2	-0.260719	0.254486	0.248314
4696	P30306;Q9DBN8	372;346	S	P30306	S372	M-phase inducer phosphatase 2	Cdc25b	EQQLEEPKARVFRSKSLCHEIENILDSDHRG	S(1)LCHEIENILDSDHR	S(87.94)LCHEIENILDS(-87.94)DHR	1	0.000107304	103.66	3	639.944	-0.050286	+	-0.321036	-0.222138		2	-0.271587	0.069931	0.0833484	-0.122642	-0.170368		2	-0.146505	0.0337477	0.248314
8911	Q8C804	549	S	Q8C804	S549	Spindle and centriole-associated protein 1	Spice1	FEPAVMLTPPRQKSNSEFSPLQDVLRRTVQT	S(0.017)NS(0.973)EFS(0.011)PLQDVLRR	S(-17.61)NS(17.61)EFS(-19.66)PLQDVLRR	3	0.0153439	62.438	3	576.609	-1.1662	+	-0.224637	-0.230099	-0.26	3	-0.238245	0.0190369	0.0908695	-0.144138	-0.104881	-0.192735	3	-0.147251	0.0440093	0.248314
1093	P51954;B7ZWK0	1002;1030	S	P51954	S1002	Serine/threonine-protein kinase Nek1	Nek1	ANNPKMLRTCSLPDLSKLFRTLMDVPTVGDV	MLRTCSLPDLS(1)K	MLRT(-44.18)CS(-38.02)LPDLS(38.02)K	11	0.00747597	91.307	2	758.849	0.19076	+	-0.12722	-0.108323	-0.448041	3	-0.227862	0.190915	0.163565	-0.146469	-0.0879002	-0.470484	3	-0.234951	0.206069	0.248314
7109	Q64701	983	S	Q64701	S983	Retinoblastoma-like protein 1	Rbl1	PGSPRRISQQHSLYVSPHKNGAGLTPRSALL	ISQQHSLYVS(1)PHK	IS(-70.84)QQHS(-77.5)LY(-59.03)VS(59.03)PHK	10	6.6251e-05	110.56	3	535.259	-3.5699	+	-0.192675	0.0182843	-0.171551	3	-0.115314	0.11618	0.450315	-0.156337	-0.142348	-0.103872	3	-0.134186	0.0271682	0.248314
8822	Q8C147;Q8C147-2	903;537	S	Q8C147	S903	Dedicator of cytokinesis protein 8	Dock8	SAAAVSSKLMQARVMSSSNPDLTGSHCAADE	VMS(0.876)S(0.058)S(0.064)NPDLT(0.001)GSHCAADEEVK	VMS(11.34)S(-11.8)S(-11.34)NPDLT(-29.65)GS(-33.22)HCAADEEVK	3	4.15682e-54	166.05	3	777.315	0.078094	+		0.0244036	-0.00160392	2	0.0113998	0.0183901	0.91438		-1.11258	-0.0551489	2	-0.583864	0.747716	0.248314
8570	Q8BTI8;Q8BTI8-3;Q8BTI8-2	778;778;682	S	Q8BTI8	S778	Serine/arginine repetitive matrix protein 2	Srrm2	PRSKAKSLRRSLSGSSPCPKQKSQTPTRRSR	SLSGS(0.049)S(0.951)PCPK	S(-90.76)LS(-50.76)GS(-12.86)S(12.86)PCPK	6	1.27632e-62	201.38	2	550.228	0.67638	+	-0.271857	-0.257982	-0.33672	3	-0.288853	0.0420303	0.0618307	-0.120673	-0.119741	-0.184635	3	-0.141683	0.0372003	0.248799
510	O54826;A2AS70	499;421	S	O54826	S499	Protein AF-10	Mllt10	NKNQENVSHLSVSSASPTSSVASAAGSVTSS	NQENVSHLS(0.001)VS(0.075)S(0.075)AS(0.824)PT(0.017)S(0.005)S(0.002)VASAAGSVTSSSLQK	NQENVS(-37.13)HLS(-28.08)VS(-10.4)S(-10.4)AS(10.4)PT(-16.81)S(-21.81)S(-26.73)VAS(-41.55)AAGS(-43.83)VT(-54.54)S(-58.84)S(-63.03)S(-67.1)LQK	14	5.60847e-36	106.61	3	1095.51	0.63817	+	-0.330135	0.0671825		2	-0.131476	0.280946	0.733024	-0.290213	-0.11006		2	-0.200136	0.127387	0.248799
2677	Q6EJB6;E9Q9S3	51;75	S	Q6EJB6	S51	U3 small nucleolar RNA-associated protein 14 homolog B	Utp14b	DSDGEGKRQKLLEAVSSLGRKNKWKLAERSE	LLEAVS(0.9)S(0.1)LGRK	LLEAVS(9.54)S(-9.54)LGRK	6	0.000153166	107.39	3	418.227	-3.0003	+	-0.242695		-0.263731	2	-0.253213	0.0148744	0.0612454	-0.0752549		-0.21532	2	-0.145288	0.0990412	0.249209
5417	P81122	616	S	P81122	S616	Insulin receptor substrate 2	Irs2	FSGSSGRLCPSFPASSPKVAYNPYPEDYGDI	LCPSFPAS(0.001)S(0.999)PK	LCPS(-42.33)FPAS(-28.61)S(28.61)PK	9	0.00577477	76.326	2	635.781	-1.8427	+		-0.126575	-0.702025	2	-0.4143	0.406905	0.115597		-0.105402	-0.449972	2	-0.277687	0.243648	0.249209
9027	Q8CFJ9	470	S	Q8CFJ9	S470	WD repeat-containing protein 24	Wdr24	IYCSPGLVSSANLNHSVGKGSSCGLPLMNSF	IIYCSPGLVSS(0.001)ANLNHS(0.999)VGK	IIY(-64.76)CS(-59.23)PGLVS(-35.6)S(-31.65)ANLNHS(31.65)VGK	17	1.21317e-05	94.359	3	732.689	-0.85434	+	-0.235981	-0.0309617		2	-0.133471	0.14497	0.367372	-0.11401	-0.185806		2	-0.149908	0.0507671	0.249209
6241	Q4G0F8;Q4G0F8-2;Q4G0F8-3	173;173;173	S	Q4G0F8	S173	Ubinuclein-1	Ubn1	GGFYINSGTLQFRQASESEDDFIKEKKKKSP	Y(0.002)GGFY(0.001)INS(0.008)GT(0.019)LQFRQAS(0.986)ES(0.984)EDDFIK	Y(-30.52)GGFY(-36.59)INS(-25.79)GT(-20.6)LQFRQAS(21.36)ES(20.6)EDDFIK	17	1.16506e-05	83.082	3	1011.43	0.96277	+	-0.0352738		-0.124309	2	-0.0797912	0.0629571	0.417282	-0.108024		-0.109106	2	-0.108565	0.00076534	0.249209
13316	Q69ZA1;Q69ZA1-2	495;495	T	Q69ZA1	T495	Cyclin-dependent kinase 13	Cdk13	AAEAAAKAAKASNASTPTKGNTETGASVSQT	AS(0.012)NAS(0.094)T(0.816)PT(0.075)KGNT(0.003)ETGASVSQTNHVK	AS(-18.49)NAS(-9.38)T(9.38)PT(-10.34)KGNT(-24.22)ET(-49.3)GAS(-36.98)VS(-40.61)QT(-44.13)NHVK	6	2.42183e-05	97.877	3	856.396	-2.1566	+	-0.298734	0.036589	-0.106803	3	-0.122983	0.168246	0.507731	-0.289879	-0.093956	-0.126261	3	-0.170032	0.10504	0.249209
12824	P61406	478	T	P61406	T478	Telomerase-binding protein EST1A	Smg6	KPALKSQTPQLHFLDTDDEISPTSWGDSRQA	SQTPQLHFLDT(1)DDEISPTSWGDSR	S(-66.63)QT(-51.42)PQLHFLDT(51.42)DDEIS(-52.65)PT(-62.62)S(-61.2)WGDS(-72.13)R	11	8.7092e-37	130.95	3	938.075	-0.37078	+	-0.227004	-0.124395		2	-0.175699	0.0725556	0.17598	-0.165778	-0.133417		2	-0.149598	0.0228827	0.249612
9417	Q8R0S1	100	S	Q8R0S1	S100	Cyclic AMP-dependent transcription factor ATF-7	Atf7	DEKKGAAGPLDMSLPSTPDIKIKEEEPVEVD	KGAAGPLDMS(0.001)LPS(0.854)T(0.145)PDIK	KGAAGPLDMS(-30.06)LPS(7.71)T(-7.71)PDIK	13	1.2841e-06	125.92	3	626.641	0.92076	+	0.337479	0.305545	0.275446	3	0.306157	0.0310213	0.0962398	0.13291	0.0776222	0.175048	3	0.128527	0.0488606	0.250235
2500	E9Q7E2	631	S	E9Q7E2	S631		Arid2	PISTPVVRVDAVADLSPTPSPAGIPHGPQAA	VDAVADLS(0.996)PT(0.004)PSPAGIPHGPQAAGNHFQR	VDAVADLS(24.07)PT(-24.07)PS(-37.75)PAGIPHGPQAAGNHFQR	8	0.000572642	58.515	4	747.609	0.49786	+	0.255755	0.243385	0.301551	3	0.266897	0.0306421	0.120712	0.0674451	0.12156	0.224084	3	0.137696	0.0795564	0.250235
12521	O70400;S4R1V0	146;146	T	O70400	T146	PDZ and LIM domain protein 1	Pdlim1	PAPSTRVITNQYNSPTGLYSSENISNFNNAV	VITNQY(0.005)NS(0.119)PT(0.854)GLY(0.021)S(0.001)SENISNFNNAVESK	VIT(-51.62)NQY(-22.56)NS(-8.56)PT(8.56)GLY(-16)S(-28.67)S(-44.02)ENIS(-73.35)NFNNAVES(-124.67)K	10	4.68005e-70	152.5	3	1057.48	1.3659	+	0.241945	0.240824		2	0.241384	0.000792679	0.12797	0.0988251	0.118199		2	0.108512	0.0136991	0.250235
7761	Q7TNE3;Q5SX56	158;148	S	Q7TNE3	S158	Sperm-associated antigen 7	Spag7	QKQEEEAAQQGPAVVSPASDYKDKYSHLIGK	ELAQKQEEEAAQQGPAVVS(0.999)PAS(0.001)DYKDK	ELAQKQEEEAAQQGPAVVS(29.21)PAS(-29.21)DY(-36.42)KDK	19	4.48783e-27	145.61	4	749.853	0.84267	+	0.178142	0.195291	0.212844	3	0.195426	0.0173515	0.209712	0.0846266	0.150019	0.156724	3	0.130456	0.0398312	0.250235
14388	Q9Z0U1	435	T	Q9Z0U1	T435	Tight junction protein ZO-2	Tjp2	SSREETSGRLSRMGATPTPFKSTGDITAAGV	MGAT(0.99)PT(0.01)PFK	MGAT(19.87)PT(-19.87)PFK	4	0.016297	84.507	2	515.227	0.98929	+	0.00603795	-0.0122354	0.236213	3	0.0766717	0.138468	0.947018	0.228545	0.0356698	0.245422	3	0.169879	0.116534	0.250235
2753	Q5PSV9;E9QK89	1215;1216	S	Q5PSV9	S1215	Mediator of DNA damage checkpoint protein 1	Mdc1	ATRGRPSKSSIKTPESVVPTGPELQPLTSAK	S(0.035)S(0.035)IKT(0.149)PES(0.774)VVPT(0.006)GPELQPLTSAK	S(-13.39)S(-13.39)IKT(-7.14)PES(7.14)VVPT(-21.11)GPELQPLT(-59.44)S(-59.18)AK	8	0.00512794	65.855	4	612.317	-0.22845	+	0.25159	0.305007		2	0.278298	0.037772	0.0999088	0.0799602	0.156549		2	0.118255	0.0541566	0.250394
8362	Q8BJW7	15	S	Q8BJW7	S15	Crossover junction endonuclease EME1	Eme1	_MALRRLSLSRLSTESDSEDLPTFAFLKKEP	LST(0.001)ES(0.999)DSEDLPTFAFLK	LS(-37.55)T(-32.49)ES(32.49)DS(-50.37)EDLPT(-129.84)FAFLK	5	1.40434e-141	221.51	2	990.448	-0.46131	+	-0.636708	-0.588919		2	-0.612814	0.0337915	0.0171946	-0.096771	-0.232881		2	-0.164826	0.0962445	0.251383
3878	H9KV00	2436	S	H9KV00	S2436		Son	HFLFRVLINGSAYQPSFASPNKKHAKATAAT	VLINGSAYQPS(0.938)FAS(0.062)PNKK	VLINGS(-68.58)AY(-78.94)QPS(11.79)FAS(-11.79)PNKK	11	8.4828e-06	113.33	3	667.666	-0.53893	+	-0.522488	-0.471289	-0.461228	3	-0.485002	0.0328515	0.0267725	-0.21442	-0.162437	-0.0675544	3	-0.148137	0.0744697	0.251383
12475	O35130	25	T	O35130	T25	Ribosomal RNA small subunit methyltransferase NEP1	Emg1	PRERRFSVQEQDWETTPPKKLRLGAGSKCGG	RFSVQEQDWET(0.057)T(0.943)PPKK	RFS(-82.37)VQEQDWET(-12.22)T(12.22)PPKK	12	0.00061592	85.976	4	514.744	2.4435	+	-0.388425	-0.441435	-0.426251	3	-0.418704	0.027299	0.0346311	-0.114711	-0.111939	-0.184521	3	-0.137057	0.0411286	0.251383
1888	Q7TT79;E9PX19;F6Q8J5	170;170;56	S	Q7TT79	S170	Microcephalin	Mcph1	VPVLLFESPRSLVYSSPVNVMKRRLQDMKEK	SLVYS(0.047)S(0.953)PVNVMK	S(-96.09)LVY(-64.74)S(-13.05)S(13.05)PVNVMK	6	0.00549484	118.19	2	702.336	-0.42136	+	-0.385957	-0.350665		2	-0.368311	0.0249554	0.0499332	-0.220343	-0.109573		2	-0.164958	0.0783263	0.251383
13523	Q80WQ8;Q80WQ8-3;Q80WQ8-2	39;39;39	T	Q80WQ8	T39	Mis18-binding protein 1	Mis18bp1	PLDAVFIDSIPSGTLTPLKDLVKYQKSSLKV	NMPLDAVFIDSIPSGTLT(1)PLK	NMPLDAVFIDS(-128.91)IPS(-59.65)GT(-42.95)LT(42.95)PLK	18	1.14417e-54	164.69	3	770.388	1.2073	+	-0.364949	-0.313784	-0.349375	3	-0.342702	0.0262269	0.0506871	-0.1656	-0.183852	-0.0646451	3	-0.138032	0.064207	0.251383
2852	Q8BZN6;E9QM99;Q8BZN6-2;Q8BZN6-3	1232;1232;1232;1232	S	Q8BZN6	S1232	Dedicator of cytokinesis protein 10	Dock10	PRIYLKDLYPFTVNTSNQGSRDDLSTNGGFQ	DLY(0.004)PFT(0.198)VNT(0.886)S(0.886)NQGS(0.015)RDDLS(0.006)T(0.003)NGGFQTQTSMK	DLY(-27.36)PFT(-9.01)VNT(9.01)S(9.01)NQGS(-21.28)RDDLS(-26.18)T(-30.08)NGGFQT(-39.64)QT(-48.17)S(-50.03)MK	10	5.76628e-06	85.157	3	1190.5	-2.5243	+	-0.364567	-0.353832	-0.276531	3	-0.331643	0.0480294	0.0506871	-0.1905	-0.15706	-0.0691499	3	-0.138903	0.0626794	0.251383
12129	Q8BZN6;E9QM99;Q8BZN6-2;Q8BZN6-3	1231;1231;1231;1231	T	Q8BZN6	T1231	Dedicator of cytokinesis protein 10	Dock10	MPRIYLKDLYPFTVNTSNQGSRDDLSTNGGF	DLY(0.004)PFT(0.198)VNT(0.886)S(0.886)NQGS(0.015)RDDLS(0.006)T(0.003)NGGFQTQTSMK	DLY(-27.36)PFT(-9.01)VNT(9.01)S(9.01)NQGS(-21.28)RDDLS(-26.18)T(-30.08)NGGFQT(-39.64)QT(-48.17)S(-50.03)MK	9	5.76628e-06	85.157	3	1190.5	-2.5243	+	-0.364567	-0.353832	-0.276531	3	-0.331643	0.0480294	0.0506871	-0.1905	-0.15706	-0.0691499	3	-0.138903	0.0626794	0.251383
1796	E9PVX6	1836	S	E9PVX6	S1836		Mki67	IALQSPQPGHIINPASMKRQSNMSLRKDMRE	IALQS(1)PQPGHIINPAS(1)MKR	IALQS(70.41)PQPGHIINPAS(70.41)MKR	16	0.000182729	94.295	3	740.025	-0.090872	+	-0.408568	-0.281822	-0.367729	3	-0.352706	0.0646945	0.0506871	-0.15235	-0.0885068	-0.21643	3	-0.152429	0.0639615	0.251383
1736	E9PVA6;F6SLJ2;F7BIK4	415;78;387	S	E9PVA6	S415		Git2	DTDVETRASKANRQKSLDSDLSDGPVTVQEF	S(0.967)LDS(0.033)DLSDGPVTVQEFMEVK	S(14.68)LDS(-14.68)DLS(-54.62)DGPVT(-111.57)VQEFMEVK	1	9.86661e-66	164.31	2	1138.51	0.18799	+	-0.367715	-0.315379		2	-0.341547	0.037007	0.0537856	-0.182015	-0.121582		2	-0.151798	0.0427328	0.251383
4651	P26350	2	S	P26350	S2	Prothymosin alpha;Prothymosin alpha, N-terminally processed;Thymosin alpha	Ptma	______________MSDAAVDTSSEITTKDL	S(1)DAAVDTSSEITTK	S(73.14)DAAVDT(-73.14)S(-77.93)S(-82.05)EIT(-107.69)T(-120.44)K	1	4.57251e-47	192.96	2	773.83	0.4452	+		-0.270414	-0.603869	2	-0.437142	0.235789	0.0537856		-0.0999389	-0.481615	2	-0.290777	0.269885	0.251383
12398	H3BL37;O08784;Q05CS0;H3BIX0	453;453;453;453	T	H3BL37	T453	Treacle protein	Tcof1	KPLGKSSQVRPVSTVTPGSSGKGANLPCPGK	SSQVRPVS(0.119)T(0.017)VT(0.832)PGS(0.024)S(0.006)GK	S(-33.94)S(-33.94)QVRPVS(-8.44)T(-16.79)VT(8.44)PGS(-15.34)S(-21.56)GK	11	0.0129143	74.324	3	585.288	-1.9985	+	-0.370774	-0.29382		2	-0.332297	0.0544146	0.0547782	-0.164769	-0.124487		2	-0.144628	0.0284835	0.251383
6718	Q61033	308	S	Q61033	S308	Lamina-associated polypeptide 2, isoforms alpha/zeta	Tmpo	SSQREFAARLVSAAASPSLIRETTTTYSKDI	LVSAAAS(1)PSLIRETTTTYSK	LVS(-43.26)AAAS(41.09)PS(-41.09)LIRET(-71.66)T(-71.66)T(-65.42)T(-70.2)Y(-80.72)S(-85.92)K	7	7.09812e-56	190.99	3	726.035	0.098845	+	-0.330414	-0.273371	-0.337918	3	-0.313901	0.0353002	0.0547782	-0.122281	-0.113256	-0.177652	3	-0.13773	0.034867	0.251383
8126	Q80YR7;F6S522	816;305	S	Q80YR7	S816	Claspin	Clspn	KSSGKLSEPSLPVEDSQDLYTASPEPKTLFL	LSEPSLPVEDS(0.98)QDLY(0.009)T(0.011)ASPEPK	LS(-68.59)EPS(-54.03)LPVEDS(19.39)QDLY(-20.5)T(-19.39)AS(-39.3)PEPK	11	2.2585e-14	121.44	2	1241.57	-0.57881	+	-0.398005	-0.279303		2	-0.338654	0.0839349	0.055035	-0.190808	-0.121674		2	-0.156241	0.0488853	0.251383
14363	Q9WU62;Q9WU62-2	481;481	T	Q9WU62	T481	Inner centromere protein	Incenp	LRTFLHTVQKNQMLMTPTLASRSSVMKSFIK	NQMLMT(0.989)PT(0.011)LASR	NQMLMT(19.59)PT(-19.59)LAS(-59.11)R	6	0.000914168	101.3	2	721.83	1.8295	+		-0.250364	-0.426723	2	-0.338543	0.124704	0.059279		-0.108797	-0.246966	2	-0.177882	0.0977002	0.251383
8303	Q8BHZ4	1089	S	Q8BHZ4	S1089	Zinc finger protein 592	Znf592	PDLSQTSKVRHPGGPSPQVNHLKRPVSRMAD	VRHPGGPS(1)PQVNHLK	VRHPGGPS(65.29)PQVNHLK	8	0.00114603	91.518	4	426.469	-0.04297	+	-0.328725	-0.253685	-0.31116	3	-0.297857	0.0392492	0.059279	-0.106633	-0.125472	-0.190276	3	-0.140793	0.0438759	0.251383
5328	P70372	202	S	P70372	S202	ELAV-like protein 1	Elavl1	PNQNKNMALLSQLYHSPARRFGGPVHHQAQR	NMALLSQLYHS(1)PAR	NMALLS(-83.26)QLY(-47.11)HS(47.11)PAR	11	5.90108e-05	118.23	3	560.936	-0.6601	+	-0.338254	-0.203863	-0.409899	3	-0.317339	0.104598	0.0607115	-0.159176	-0.0908185	-0.181243	3	-0.143746	0.0471457	0.251383
13807	Q8K019;Q8K019-2	839;837	T	Q8K019	T839	Bcl-2-associated transcription factor 1	Bclaf1	TFQKRPKEEEWDPEYTPKSKKYFLHDDRDDG	EEEWDPEYT(1)PK	EEEWDPEY(-70.07)T(70.07)PK	9	0.000116161	125.33	2	751.79	0.68637	+	-0.301865	-0.310327	-0.235074	3	-0.282422	0.0412224	0.0612454	-0.186646	-0.162576	-0.0687423	3	-0.139321	0.0622967	0.251383
7791	Q7TPV4	1308	S	Q7TPV4	S1308	Myb-binding protein 1A	Mybbp1a	ALSTKEVIRKSPHPQSALPKKRARLSLVSRS	S(0.005)PHPQS(0.995)ALPK	S(-22.66)PHPQS(22.66)ALPK	6	0.00134406	94.547	2	571.274	-0.6521	+	-0.387619	-0.250759		2	-0.319189	0.0967749	0.0612454	-0.0928609	-0.246608		2	-0.169735	0.108716	0.251383
13958	Q8VIJ6	679	T	Q8VIJ6	T679	Splicing factor, proline- and glutamine-rich	Sfpq	AGPVGGQGPRGMGPGTPAGYGRGREEYEGPN	GMGPGT(1)PAGYGR	GMGPGT(61.21)PAGY(-61.21)GR	6	0.00148872	103.3	2	600.747	0.46364	+	-0.259858	-0.288496	-0.224326	3	-0.25756	0.032147	0.0737506	-0.114277	-0.134215	-0.132196	3	-0.126896	0.0109747	0.251383
11867	Q8K4B0;F8WHY8;E9PX23	578;561;578	T	Q8K4B0	T578	Metastasis-associated protein MTA1	Mta1	LTPAKSAPVINNGSPTILGKRSYEQHNGVDG	SAPVINNGS(0.002)PT(0.998)ILGKR	S(-130.86)APVINNGS(-28.2)PT(28.2)ILGKR	11	4.37908e-57	189.15	2	852.446	0.20701	+	-0.226997	-0.288572	-0.233605	3	-0.249725	0.033805	0.0805274	-0.0618293	-0.209405	-0.256694	3	-0.175976	0.101642	0.251383
7994	Q80WE4;Q80WE4-2;Q80WE4-3;Q80WE4-4	1694;1268;1654;1682	S	Q80WE4	S1694	Kinesin-like protein KIF20B	Kif20b	KREGTLQKFGDFLQHSPTILQSKAKKIIETM	FGDFLQHS(0.996)PT(0.004)ILQSK	FGDFLQHS(23.65)PT(-23.65)ILQS(-51.24)K	8	2.00859e-11	134.4	3	599.957	-2.2466	+	-0.232132	-0.228523	-0.275427	3	-0.24536	0.0261005	0.085756	-0.114411	-0.126633	-0.151155	3	-0.130733	0.0187122	0.251383
4770	P35601;P35601-2;Q5U4B1;G3UWX1;G3X8Z6;G3UXL4	176;176;176;176;176;176	S	P35601	S176	Replication factor C subunit 1	Rfc1	PTSVLDYFGTESVQRSGKKMVTSKRKESSQN	LTPTSVLDYFGT(0.003)ES(0.006)VQRS(0.991)GK	LT(-77.36)PT(-72.1)S(-68.68)VLDY(-55.45)FGT(-25.77)ES(-21.98)VQRS(21.98)GK	18	0.00031086	85.387	3	755.698	0.029258	+	-0.270147	-0.181748	-0.291857	3	-0.247917	0.0583236	0.0908695	-0.174002	-0.110586	-0.10995	3	-0.131512	0.0367981	0.251383
13465	Q7TPV4	1191	T	Q7TPV4	T1191	Myb-binding protein 1A	Mybbp1a	LPETKKRKKLKSEGTTPEKNAASQQDAVTEG	LKSEGT(0.002)T(0.998)PEK	LKS(-44.53)EGT(-26.19)T(26.19)PEK	7	7.03447e-08	167.22	3	390.52	-2.4891	+	-0.232325		-0.182129	2	-0.207227	0.0354936	0.0908695	-0.0967363		-0.12156	2	-0.109148	0.0175529	0.251383
7999	Q80WE4;Q80WE4-2;Q80WE4-3;Q80WE4-4	1711;1285;1671;1699	S	Q80WE4	S1711	Kinesin-like protein KIF20B	Kif20b	TILQSKAKKIIETMSSPKLSTVEVSKENVSQ	IIETMS(0.047)S(0.953)PK	IIET(-59.85)MS(-13.08)S(13.08)PK	7	2.53065e-05	142.89	2	543.251	1.3116	+	-0.372409	-0.210977	-0.162355	3	-0.24858	0.10996	0.0916157	-0.25614	-0.0704891	-0.22745	3	-0.184693	0.0999384	0.251383
1812	E9PVX6	2017	S	E9PVX6	S2017		Mki67	FMETPKQKLDFTGNSSGHKRRPQTPKIRAQP	QKLDFTGNS(0.02)S(0.98)GHK	QKLDFT(-44.67)GNS(-16.98)S(16.98)GHK	10	6.24233e-14	157.37	3	500.228	0.097799	+	-0.313069	-0.150224	-0.295787	3	-0.253027	0.0894478	0.0931714	-0.146562	-0.147416	-0.0927557	3	-0.128911	0.0313146	0.251383
5297	P70227	934	S	P70227	S934	Inositol 1,4,5-trisphosphate receptor type 3	Itpr3	GVGHMMSTMVLSRKQSVFGASSLPAGVGVPE	KQS(0.997)VFGAS(0.002)S(0.001)LPAGVGVPEQLDR	KQS(26.88)VFGAS(-26.88)S(-31.7)LPAGVGVPEQLDR	3	1.36108e-05	93.851	3	774.721	1.2052	+	-0.25241	-0.214279	-0.12772	3	-0.198136	0.0638929	0.120198	-0.126586	-0.19537	-0.0775859	3	-0.133181	0.0591683	0.251383
11313	Q9Z2P8	48	S	Q9Z2P8	S48	Vesicle-associated membrane protein 5	Vamp5	KLAELEQRSDQLLDMSSAFSKTTKTLAQQKR	LAELEQRSDQLLDMS(0.836)S(0.164)AFSK	LAELEQRS(-67.08)DQLLDMS(7.06)S(-7.06)AFS(-38)K	15	2.57398e-09	129.74	3	783.366	0.66205	+	-0.167146	-0.0947818	-0.17079	3	-0.144239	0.0428701	0.205474	-0.210051	-0.0971924	-0.13526	3	-0.147501	0.0574164	0.251383
10610	Q9DBH0	211	S	Q9DBH0	S211	NEDD4-like E3 ubiquitin-protein ligase WWP2	Wwp2	HSGGSARTATAASEQSPGARNRHRQPVKNSS	TATAASEQS(1)PGAR	T(-127.75)AT(-110.97)AAS(-59.79)EQS(59.79)PGAR	9	4.08051e-32	171.52	2	663.788	-0.83458	+		-0.121835	-0.0646077	2	-0.0932211	0.0404655	0.343303		-0.139962	-0.148201	2	-0.144082	0.00582647	0.251383
5957	Q3UC82	243	S	Q3UC82	S243	DNA ligase	Lig3	SGFSAKPNNSEQAPSSPAPGTSLSASKCDPK	FS(0.001)GFS(0.001)AKPNNS(0.005)EQAPS(0.064)S(0.9)PAPGT(0.02)S(0.007)LS(0.002)ASK	FS(-30.77)GFS(-30.77)AKPNNS(-22.76)EQAPS(-11.48)S(11.48)PAPGT(-16.47)S(-21.29)LS(-25.93)AS(-34.61)K	17	7.76966e-57	167.41	4	708.578	0.91836	+	-0.121898	-0.00106968	-0.196784	3	-0.106584	0.0987517	0.418727	-0.0823904	-0.189915	-0.153754	3	-0.14202	0.0547145	0.251383
11799	O88427;E0CYZ3;O88427-2;E9Q6P9	281;175;281;281	T	O88427	T281	Voltage-dependent T-type calcium channel subunit alpha-1H	Cacna1h	FVRNNNLTFLRPYYQTEEGEENPFICSSRRD	PY(0.028)Y(0.028)QT(0.944)EEGEENPFICSSRR	PY(-15.28)Y(-15.28)QT(15.28)EEGEENPFICS(-54.77)S(-54.77)RR	5	0.0123673	55.128	3	814.674	-2.9711	+		-0.574433	0.0984981	2	-0.237968	0.475834	0.660053		-0.524692	-0.0600554	2	-0.292374	0.328548	0.251383
10293	Q9CWU4	156	S	Q9CWU4	S156	UPF0690 protein C1orf52 homolog		AKKARLLPEGEETVESDDDKDERASKIRRVE	LLPEGEETVES(1)DDDKDER	LLPEGEET(-34.52)VES(34.52)DDDKDER	11	0.000491758	87.554	3	719.302	2.2373	+		-0.321709	0.0775081	2	-0.122101	0.282289	0.665684		-0.237141	-0.0777675	2	-0.157454	0.112694	0.251383
337	Q923J1;A2AI57	1502;1501	S	Q923J1	S1502	Transient receptor potential cation channel subfamily M member 7	Trpm7	TSLHSVQAESCSRRASTEDSPEVDSKAALLP	RAS(0.996)T(0.004)EDS(0.999)PEVDS(0.001)K	RAS(24.68)T(-24.68)EDS(32.35)PEVDS(-33.38)K	3	8.37289e-09	154.46	2	790.797	0.6355	+		-0.746202	0.365049	2	-0.190576	0.785773	0.877674		-0.812959	-0.0514998	2	-0.432229	0.538433	0.251383
7579	Q6PR54;Q6PR54-3;Q6PR54-2	1540;1547;1540	S	Q6PR54	S1540	Telomere-associated protein RIF1	Rif1	RRASQGLISAVENSESDSSEAKEEVSRKKRS	ASQGLISAVENS(0.001)ES(0.997)DS(0.002)S(0.001)EAK	AS(-175.14)QGLIS(-127.91)AVENS(-32.27)ES(27.42)DS(-27.42)S(-32.27)EAK	14	6.14421e-164	213.1	2	1044.95	1.148	+	0.0374663	0.0476642	-0.0355898	3	0.0165136	0.04541	0.954434	-0.124341	-0.161951	-0.0960057	3	-0.127433	0.0330811	0.251383
2807	Q8CIC2;E9QL43	230;230	S	Q8CIC2	S230	Nucleoporin-like protein 2	Nupl2	VPAFGFGSKQAGSFGSPGFPVNNSSSSTVQN	QAGS(0.175)FGS(0.822)PGFPVNNS(0.001)S(0.001)SSTVQNFSFK	QAGS(-6.72)FGS(6.72)PGFPVNNS(-27.65)S(-31.28)S(-38.72)S(-37.86)T(-41.84)VQNFS(-55.86)FK	7	4.34193e-07	77.504	3	920.076	0.90633	+	0.164353	0.166134	0.237134	3	0.189207	0.0415156	0.223441	0.107538	0.0873909	0.188257	3	0.127729	0.0533785	0.251959
10291	Q9CWI3	283	S	Q9CWI3	S283	BRCA2 and CDKN1A-interacting protein	Bccip	YSVQGESDTRLGGRWSFDDVPMTPLRTVMVI	LGGRWS(1)FDDVPMTPLR	LGGRWS(50.51)FDDVPMT(-50.51)PLR	6	0.0157472	69.765	3	642.969	-0.63527	+	0.320645	0.228298	0.273623	3	0.274189	0.0461761	0.120395	0.122588	0.0897285	0.165541	3	0.125953	0.0380181	0.252038
12554	P05213;P68368;P68373	271;271;271	T	P05213;P68368;P68373	T271	Tubulin alpha-1B chain;Tubulin alpha-4A chain;Tubulin alpha-1C chain	Tuba1b;Tuba4a;Tuba1c	QTNLVPYPRIHFPLATYAPVISAEKAYHEQL	IHFPLAT(0.856)Y(0.144)APVISAEK	IHFPLAT(7.75)Y(-7.75)APVIS(-63.21)AEK	7	0.002662	75.764	3	612.981	1.9407	+	0.111834	-0.0132865	0.123586	3	0.0740443	0.0758586	0.801183	0.172702	0.0504571	0.206866	3	0.143342	0.0822343	0.252038
919	Q4JIM5;B2RQ57;F8VQH0	619;619;619	S	Q4JIM5	S619	Abelson tyrosine-protein kinase 2	Abl2	SSSAPAGFIRSTQASSGSPALPRKQRDKSPS	STQAS(0.051)S(0.94)GS(0.009)PALPRK	S(-44.94)T(-49.8)QAS(-12.69)S(12.69)GS(-20.26)PALPRK	6	1.16548e-05	138.28	2	733.854	0.41944	+	0.0170751	-0.0678815		2	-0.0254032	0.0600734	0.821212	0.0691834	0.198272		2	0.133728	0.0912795	0.252038
8223	Q8BGT7	201	S	Q8BGT7	S201	Survival of motor neuron-related-splicing factor 30	Smndc1	YSKNKKGQVKRSIFASPESVTGKVGVGTCGI	RSIFAS(1)PESVTGK	RS(-50.04)IFAS(39.35)PES(-39.35)VT(-54.68)GK	6	2.88739e-06	140.89	2	729.853	0.63598	+	-0.27009	-0.32981	-0.33624	3	-0.312047	0.0364771	0.0547782	-0.0972226	-0.1904	-0.105919	3	-0.13118	0.0514696	0.252132
878	Q8BKX1;Q8BKX1-2;Q8BKX1-3;B1AZ46;Q8BKX1-4	455;455;455;455;415	S	Q8BKX1	S455	Brain-specific angiogenesis inhibitor 1-associated protein 2	Baiap2	GSDRLHMSLQQGKSSSTGNLLDKDDLALPPP	S(0.062)S(0.062)S(0.823)T(0.053)GNLLDKDDLALPPPDYGTSSR	S(-11.21)S(-11.21)S(11.21)T(-11.92)GNLLDKDDLALPPPDY(-74.4)GT(-76.14)S(-78.17)S(-78.17)R	3	6.86194e-05	84.878	3	896.08	0.99382	+		-0.316953	-0.167051	2	-0.242002	0.105996	0.093169		-0.234197	-0.0763127	2	-0.155255	0.111641	0.252554
5227	P62754	235	S	P62754	S235	40S ribosomal protein S6	Rps6	AKEKRQEQIAKRRRLSSLRASTSKSESSQK_	RLS(1)S(0.872)LRAS(0.03)T(0.049)S(0.049)K	RLS(40.19)S(12.5)LRAS(-14.67)T(-12.5)S(-12.5)K	3	0.000301742	151.2	2	683.318	-0.59272	+	-0.0598323	-0.114266	-0.207015	3	-0.127038	0.0744178	0.28496	-0.204554	-0.0646943	-0.862418	3	-0.377222	0.425971	0.252554
4050	O09100	73	S	O09100	S73	Endothelial transcription factor GATA-2	Gata2	PYYANPAHARARVSYSPAHARLTGGQMCRPH	VS(0.02)YS(0.98)PAHAR	VS(-16.97)Y(-37.73)S(16.97)PAHAR	4	0.00619833	84.188	2	534.237	-0.57762	+	-0.452595	-0.279336		2	-0.365965	0.122512	0.0537856	-0.143015	-0.134458		2	-0.138736	0.00605071	0.252633
12522	O70405	452	T	O70405	T452	Serine/threonine-protein kinase ULK1	Ulk1	QVHNYQRIEQNLQSPTQQQTARSSAIRRSGS	IEQNLQS(0.05)PT(0.95)QQQTAR	IEQNLQS(-12.79)PT(12.79)QQQT(-91.59)AR	9	4.73161e-133	211.67	2	911.428	-1.1056	+	0.395973	0.299594		2	0.347784	0.0681496	0.0631146	0.129222	0.0881715		2	0.108697	0.0290268	0.254211
5512	P99026	129	S	P99026	S129	Proteasome subunit beta type-4	Psmb4	QMVIDEELLGDGHSYSPRAIHSWLTRAMYSR	QVLGQMVIDEELLGDGHS(0.024)Y(0.008)S(0.968)PR	QVLGQMVIDEELLGDGHS(-16.03)Y(-21.07)S(16.03)PR	20	2.10933e-07	92.924	3	841.724	-1.611	+	-0.0381946	0.0237462		2	-0.00722423	0.0437987	0.882732	0.135127	0.0840756		2	0.109601	0.0360989	0.254978
10587	Q9DB52	59	S	Q9DB52	S59	Protein FAM122A	Fam122a	SSPVFQAEAPSARRNSTTFPSRHGLLLPASP	RNS(0.955)T(0.01)T(0.035)FPSR	RNS(14.39)T(-19.9)T(-14.39)FPS(-55.55)R	3	0.000725058	117.95	2	573.259	1.2763	+	0.194265	0.170995	0.286451	3	0.217237	0.0610599	0.182318	0.146837	0.057514	0.205951	3	0.136768	0.0747293	0.255543
1019	Q8BTM8;B7FAU9;B7FAV1	968;968;944	S	Q8BTM8	S968	Filamin-A	Flna	GDHIPKSPFSVGVSPSLDLSKIKVSGLGDKV	SPFSVGVSPS(1)LDLSK	S(-78.04)PFS(-68.72)VGVS(-43.33)PS(34.88)LDLS(-34.88)K	10	3.2222e-114	205.92	3	533.927	-0.4297	+	0.195678	0.212933	0.215918	3	0.208176	0.0109261	0.19038	0.154121	0.11391	0.117458	3	0.128496	0.0222623	0.255704
13299	Q64701;Q64701-2	369;369	T	Q64701	T369	Retinoblastoma-like protein 1	Rbl1	NLQQHFEKKRSFAPSTPLTGRRYLQEKEAVT	SFAPS(0.117)T(0.883)PLTGR	S(-70.26)FAPS(-8.78)T(8.78)PLT(-36.94)GR	6	5.81372e-06	141.34	2	607.284	-2.704	+		-0.195213	-0.050225	2	-0.122719	0.102522	0.298703		-0.113171	-0.19173	2	-0.152451	0.0555499	0.256503
1765	E9PVV1;E9PWE4;E9PWE2	378;377;378	S	E9PVV1	S378		Tcf3	PGTSQWPRAGAPSALSPNYDAGLHGLQSKME	AGAPS(0.002)ALS(0.998)PNYDAGLHGLQSK	AGAPS(-28.05)ALS(28.05)PNY(-54.26)DAGLHGLQS(-134.23)K	8	2.06602e-54	164.82	3	712.004	1.7311	+	0.234694	0.0233348	0.312569	3	0.190199	0.149663	0.363251	0.0469413	0.134719	0.318307	3	0.166656	0.138473	0.256675
13508	Q80VI1	9	T	Q80VI1	T9	E3 ubiquitin-protein ligase TRIM56	Trim56	_______MNSKVSSPTLLEALSSDFLACKIC	VS(0.017)S(0.094)PT(0.89)LLEALSSDFLACK	VS(-17.24)S(-9.78)PT(9.78)LLEALS(-94.85)S(-118.25)DFLACK	5	5.04173e-103	189.33	3	673.323	-0.62761	+	0.20197	0.185684		2	0.193827	0.0115163	0.188121	0.110861	0.100543		2	0.105702	0.00729592	0.257445
1611	Q8BYJ6;Q8BYJ6-2;Q8BYJ6-4;Q8BYJ6-3;H7BX82;E9Q6Q8;E0CX53;F6SUV7	324;324;324;324;324;324;324;37	S	Q8BYJ6	S324	TBC1 domain family member 4	Tbc1d4	DCGFDEQQEFRSRCSSVTGVMQKKVHENNQK	CS(0.005)S(0.995)VTGVMQK	CS(-22.88)S(22.88)VT(-50.45)GVMQK	3	2.03968e-15	162.93	2	588.743	-0.68874	+	0.563564	0.602505	0.369399	3	0.511823	0.12487	0.0312429	0.102153	0.241223	0.109143	3	0.15084	0.078352	0.258622
5783	Q3TSG4	364	S	Q3TSG4	S364	RNA demethylase ALKBH5	Alkbh5	RRSVLLPTHRRRGSFSSENYWRKSYESSEDC	RGS(0.145)FS(0.813)S(0.042)ENYWR	RGS(-7.49)FS(7.49)S(-12.89)ENY(-102.73)WR	5	2.13183e-07	130.15	3	490.205	1.1322	+	0.444825	0.264204	0.238809	3	0.315946	0.112333	0.104961	0.260048	0.092896	0.107538	3	0.153494	0.0925685	0.260005
8473	Q8BRH3;Q8BRH3-2;H3BJ36;E9Q4T1	422;407;87;422	S	Q8BRH3	S422	Rho GTPase-activating protein 19	Arhgap19	REPSTPRVQKRARSRSFSGLIKRKVLGSQMT	S(0.011)RS(0.989)FSGLIK	S(-19.56)RS(19.56)FS(-38.25)GLIK	3	5.36513e-05	145.28	3	358.85	0.05932	+	0.327502	0.330211	0.357407	3	0.338373	0.0165392	0.0712406	0.12862	0.0996461	0.139782	3	0.122683	0.0207161	0.261351
4034	O08796;D3Z088;Q3UWZ1	73;73;73	S	O08796	S73	Eukaryotic elongation factor 2 kinase	Eef2k	SYYSNLTKTECGSTGSPASSFHFKEAWKHAI	T(0.004)ECGS(0.009)T(0.035)GS(0.95)PAS(0.001)SFHFK	T(-23.99)ECGS(-20.03)T(-14.36)GS(14.36)PAS(-29.1)S(-33.41)FHFK	8	3.84125e-204	233.57	3	593.906	-0.10152	+	0.437386	0.71505	0.131691	3	0.428042	0.291792	0.111245	0.0615053	0.318814	0.15004	3	0.176787	0.130723	0.261351
3591	Q8R3Q2;G3X9K4	771;771	S	Q8R3Q2	S771	Serine/threonine-protein phosphatase 6 regulatory subunit 2	Ppp6r2	EGGQSPGPEKTFGPTSPCAWNVCVTRKAPLV	TFGPT(0.058)S(0.942)PCAWNVCVTR	T(-50.71)FGPT(-12.08)S(12.08)PCAWNVCVT(-63.15)R	6	0.000321193	95.5	2	966.91	-0.5537	+	0.138997	0.22745	0.278857	3	0.215101	0.0707431	0.188509	0.171708	0.117338	0.106749	3	0.131931	0.0348517	0.261677
9654	Q8VEB2	95	S	Q8VEB2	S95	Protein salvador homolog 1	Sav1	QRTPHEVMRRESHRLSAPSYLVRSLADVPRE	ES(0.007)HRLS(0.993)APSYLVR	ES(-21.52)HRLS(21.52)APS(-33.75)Y(-48.73)LVR	6	0.0141902	75.445	3	532.263	0.32422	+	0.158905	0.24005	0.161126	3	0.186694	0.0462212	0.235994	0.0848588	0.102845	0.189996	3	0.1259	0.0562326	0.261677
6148	Q3UV08;Q5RIM6;E9Q2B2;Q60974;F7C134;E9Q9Y2;Q8CHB6;Q60974-2;F7CTX2	941;1293;1225;1292;228;238;562;1292;48	S	Q3UV08;Q5RIM6	S941	Nuclear receptor corepressor 1	Ncor1	SAPLEGLICRALPRGSPHSDLKERTVLSGSI	ALPRGS(1)PHSDLK	ALPRGS(45.36)PHS(-45.36)DLK	6	0.000179568	112.62	4	340.171	-1.7548	+	-0.308423	-0.284799	-0.262997	3	-0.285406	0.0227195	0.0609136	-0.122609	-0.158009	-0.0896226	3	-0.123414	0.0342003	0.261811
14378	Q9WVM1	577	T	Q9WVM1	T577	Rac GTPase-activating protein 1	Racgap1	PRTPDVKVSLLGPVTTPEFQLVKTPLSSSLS	VSLLGPVT(0.002)T(0.998)PEFQLVK	VS(-115.44)LLGPVT(-27.77)T(27.77)PEFQLVK	9	2.93706e-204	236.66	2	904.484	1.6256	+	-0.278816	-0.235405	-0.343487	3	-0.285903	0.0543883	0.0648505	-0.108057	-0.11555	-0.170555	3	-0.131388	0.0341263	0.261811
13152	Q5SFM8;Q5SFM8-3	447;447	T	Q5SFM8	T447	RNA-binding protein 27	Rbm27	SREHGAAASERLQLGTPPPLLAARLVPPRNL	LQLGT(1)PPPLLAAR	LQLGT(80.49)PPPLLAAR	5	0.000837269	116.04	2	713.895	1.6222	+	-0.26904	-0.249584	-0.269536	3	-0.26272	0.0113788	0.072902	-0.111229	-0.139363	-0.117172	3	-0.122588	0.0148282	0.261811
3703	Q8C854;Q8C854-3;G8JL68;Q8C854-1;A2ATP5;A2ATP6	422;405;361;422;405;422	S	Q8C854	S422	Myelin expression factor 2	Myef2	DFGRGDIGLSRGFGDSFGRLGSAMIGGFAGR	GFGDS(1)FGR	GFGDS(111.86)FGR	5	0.00208336	111.86	2	461.676	-0.83283	+	-0.398103	-0.231355	-0.148788	3	-0.259415	0.127004	0.0897803	-0.181329	-0.0933149	-0.123263	3	-0.132636	0.0447493	0.261811
7101	Q64511;F6XX57	1428;302	S	Q64511	S1428	DNA topoisomerase 2-beta	Top2b	GKSKATPEKSSNDKKSQDFGNLFSFPSYSQK	S(0.001)S(0.003)NDKKS(0.996)QDFGNLFSFPSYSQK	S(-31.39)S(-24.94)NDKKS(24.94)QDFGNLFS(-50.48)FPS(-57.09)Y(-60.71)S(-63.25)QK	7	1.71216e-07	114.53	3	864.387	0.11815	+	-0.33832	-0.207174	-0.136625	3	-0.227373	0.102353	0.103722	-0.144699	-0.216275	-0.0590709	3	-0.140015	0.0787067	0.261811
8645	Q8BVY0	384	S	Q8BVY0	S384		Rsl1d1	QENITGKTPKSKSDPSTPKGKKRKALLATET	SKSDPS(0.995)T(0.004)PK	S(-37.32)KS(-42.56)DPS(23.58)T(-23.58)PK	6	0.00127229	105.25	2	513.729	1.5228	+	-0.178107	-0.27448	-0.202325	3	-0.218304	0.0501345	0.103978	-0.0793983	-0.17888	-0.144948	3	-0.134409	0.0505711	0.261811
1272	O88974;O88974-3;G5E8N3;O88974-4;D3YYC3	1017;210;1017;1018;1018	S	O88974	S1017	Histone-lysine N-methyltransferase SETDB1	Setdb1	LSCNSVSEGGFADSDSRSSFKTSEGGDGRAG	VASWLSCNSVSEGGFADS(0.038)DS(0.757)RS(0.102)S(0.102)FK	VAS(-80.44)WLS(-66.54)CNS(-59.62)VS(-47.59)EGGFADS(-12.95)DS(8.68)RS(-8.68)S(-8.68)FK	20	1.81107e-06	104.67	3	920.725	1.3163	+	-0.278206	-0.171057		2	-0.224631	0.0757659	0.117663	-0.165036	-0.120663		2	-0.14285	0.0313766	0.261811
4472	P13864	15	S	P13864	S15	DNA (cytosine-5)-methyltransferase 1	Dnmt1	_MPARTAPARVPALASPAGSLPDHVRRRLKD	TAPARVPALAS(1)PAGSLPDHVR	T(-43.76)APARVPALAS(43.24)PAGS(-43.24)LPDHVR	11	0.000658544	87.05	3	721.707	-0.31377	+	-0.226024	-0.187387	-0.0937368	3	-0.169049	0.0680232	0.163071	-0.0963538	-0.16243	-0.118695	3	-0.125826	0.0336107	0.261811
5908	Q3U3C9;Q3U3C9-4;Q3U3C9-3;Q3U3C9-2	1005;969;1002;1015	S	Q3U3C9	S1005	Genetic suppressor element 1	Gse1	LRGAAPKDIPVPLSHSINGKSKPWEPFVAEE	DIPVPLSHS(1)INGK	DIPVPLS(-33.43)HS(33.43)INGK	9	2.94288e-25	163.9	3	486.245	-0.69939	+	-0.310407	-0.13268	-0.0612639	3	-0.168117	0.128296	0.204427	-0.156549	-0.104611	-0.116176	3	-0.125779	0.0272683	0.261811
5662	Q14B71	888	S	Q14B71	S888	Cell division cycle-associated protein 2	Cdca2	LQRDLENTGLVWLSPSPSTLQKPRRRMTICT	DLENTGLVWLSPS(0.984)PS(0.008)T(0.008)LQKPR	DLENT(-62.18)GLVWLS(-35.57)PS(20.99)PS(-20.99)T(-20.99)LQKPR	13	0.000590345	78.451	3	806.74	-0.44101	+	-0.176356	-0.128089		2	-0.152222	0.0341304	0.212292	-0.0930363	-0.211683		2	-0.15236	0.083896	0.261811
8705	Q8BZQ7	513	S	Q8BZQ7	S513	Anaphase-promoting complex subunit 2	Anapc2	DPVDADPVKSSSKRRSSDIISLLVSIYGSKD	RRS(0.964)S(0.036)DIISLLVSIYGSK	RRS(14.31)S(-14.31)DIIS(-52.5)LLVS(-118.98)IY(-143.76)GS(-151.85)K	3	6.31695e-11	168.68	3	658.686	-0.7872	+		-0.0322134	-0.166489	2	-0.0993514	0.0949474	0.395023		-0.0953169	-0.333367	2	-0.214342	0.168327	0.261811
7537	Q6PGG2;Q6PGG2-2	365;365	S	Q6PGG2	S365	GEM-interacting protein	Gmip	QEFVRTLQPGAPPPPSPAFCFQEFTAVVHSF	TLQPGAPPPPS(1)PAFCFQEFTAVVHSFPQDTKK	T(-64.97)LQPGAPPPPS(49.45)PAFCFQEFT(-49.45)AVVHS(-64.82)FPQDT(-69.31)KK	11	7.38181e-32	96.831	4	902.434	0.11387	+	0.803996	0.786311	0.724758	3	0.771688	0.0415939	0.00490299	0.0828833	0.137892	0.158246	3	0.126341	0.0389869	0.261927
4453	P12382	775	S	P12382	S775	6-phosphofructokinase, liver type	Pfkl	DYVSGELEHVTRRTLSIDKGF__________	RTLS(1)IDKGF	RT(-61.07)LS(61.07)IDKGF	4	0.00529077	96.113	3	372.853	-0.03913	+	0.254451	0.26977	0.304772	3	0.276331	0.0257941	0.113393	0.124916	0.121166	0.125327	3	0.123803	0.00229294	0.261927
6419	Q68FF6;Q5F258	580;571	S	Q68FF6	S580	ARF GTPase-activating protein GIT1	Git1	IRKGVSASSVPFTPSSPLLSCSQEGSRHASK	GVSASSVPFTPS(0.039)S(0.961)PLLSCSQEGSR	GVS(-153.35)AS(-153.8)S(-149.02)VPFT(-74.63)PS(-13.92)S(13.92)PLLS(-35.39)CS(-45.29)QEGS(-45.29)R	13	3.33783e-137	205.2	2	1259.07	-0.18335	+	0.247679	0.511923	0.141607	3	0.300403	0.190705	0.148759	0.192776	0.380718	0.068415	3	0.21397	0.157226	0.261927
13929	Q8VC03	882	T	Q8VC03	T882	Echinoderm microtubule-associated protein-like 3	Eml3	QWRVLGAGSSGPAPATPSRTPSLSPASSLDV	VLGAGSSGPAPAT(0.997)PS(0.003)RTPSLSPASSLDV	VLGAGS(-54.62)S(-48.53)GPAPAT(25.75)PS(-25.75)RT(-51.99)PS(-60)LS(-61.38)PAS(-65.84)S(-64.99)LDV	13	1.54296e-06	114.9	2	1330.15	0.5731	+	0.210533	0.243286	0.0852022	3	0.179674	0.0834377	0.296943	0.111366	0.182215	0.109439	3	0.13434	0.0414721	0.261927
5040	P53995;A2ATQ5	686;686	S	P53995	S686	Anaphase-promoting complex subunit 1	Anapc1	NTDRLAWTRSFDFEGSLSPVIAPKKARPSDT	S(0.004)FDFEGS(0.962)LS(0.034)PVIAPKK	S(-23.4)FDFEGS(14.53)LS(-14.53)PVIAPKK	7	6.72612e-05	108.96	3	601.297	-1.0792	+	0.298373	0.290569		2	0.294471	0.00551818	0.0869901	0.123638	0.0895165		2	0.106577	0.0241274	0.26199
5296	P70227	1832	S	P70227	S1832	Inositol 1,4,5-trisphosphate receptor type 3	Itpr3	EDREPADPATKGRVSSFSMPSSSRYLLGLGL	VS(0.028)S(0.972)FSMPSSSR	VS(-15.42)S(15.42)FS(-38.69)MPS(-45.9)S(-48.1)S(-41.89)R	3	0.000110324	123.76	2	626.257	0.04579	+	-0.148595	-0.200129	-0.0882424	3	-0.145655	0.0560012	0.198248	-0.0537313	-0.225315	-0.245661	3	-0.174902	0.105429	0.26218
10513	Q9D6Z1;A2APD7	497;213	S	Q9D6Z1	S497	Nucleolar protein 56	Nop56	KKLKPQENGMEDPPVSLPKSKKKKAPKEELA	LKPQENGMEDPPVS(1)LPK	LKPQENGMEDPPVS(90.71)LPK	14	6.60674e-05	108.71	3	653.648	0.49278	+	-0.269492	-0.277144	-0.430059	3	-0.325565	0.0905752	0.056285	-0.12969	-0.0825995	-0.255538	3	-0.155942	0.0894081	0.263636
14332	Q9QZK7	316	T	Q9QZK7	T316	Docking protein 3	Dok3	LTDPGPQSLPLLLSPTQEGPASGLYASVCKQ	KLPLTDPGPQSLPLLLS(0.174)PT(0.824)QEGPAS(0.002)GLYASVCK	KLPLT(-70.25)DPGPQS(-50.02)LPLLLS(-6.76)PT(6.76)QEGPAS(-26.02)GLY(-43.03)AS(-56.34)VCK	19	9.5636e-44	108.19	4	879.453	1.6084	+	0.064046	0.193152	0.316242	3	0.191147	0.12611	0.275457	0.110424	0.172749	0.112006	3	0.131726	0.0355355	0.264095
4984	P51125;Q8CE80;P51125-2;P51125-6;P51125-7;P51125-3	219;185;200;204;136;200	S	P51125	S219	Calpastatin	Cast	KVVGKKKEQKPFTPASPVQSTPSKPSDKSGM	EQKPFTPAS(1)PVQSTPSKPSDK	EQKPFT(-42.25)PAS(42.25)PVQS(-55.39)T(-64.99)PS(-96.81)KPS(-96.81)DK	9	5.19346e-11	146.04	3	779.377	-0.7295	+	0.233022	0.226677	0.323206	3	0.260968	0.0539926	0.127197	0.100152	0.0648696	0.254597	3	0.139873	0.100908	0.264222
2899	Q9QXS1-3;E9QMZ5;Q9QXS1-6;E9Q3W4;Q9QXS1-15;Q9QXS1-10;E9Q153;Q9QXS1-9;Q9QXS1-12;E9QKX4;Q9QXS1-11;Q9QXS1-13;E9QLJ5;Q9QXS1-5;E9PY96;Q9QXS1-16;Q9QXS1-4;E9QL05;Q9QXS1-14;E9QQ00;Q9QXS1-7;Q9QXS1-8;E9QK43;Q9QXS1;Q9QXS1-2;E9QPE8;E9QN87	4529;4529;4558;4372;4435;4497;4497;4502;4507;4507;4512;4520;4520;4529;4529;4530;4534;4534;4536;4536;4563;4575;4575;4677;4672;4672;4677	S	Q9QXS1-3;Q9QXS1	S4529	Plectin	Plec	SSSSYSSSGYGRRYASGPSASLGGPESAVA_	RYAS(0.981)GPS(0.014)AS(0.005)LGGPESAVA	RY(-34.99)AS(18.5)GPS(-18.5)AS(-23.25)LGGPES(-59.92)AVA	4	0.000925345	93.388	2	878.899	0.33374	+		0.116076	0.126145	2	0.121111	0.00711963	0.449202		0.0979857	0.153038	2	0.125512	0.0389282	0.264222
2301	E9Q4M2;P54310;P54310-2	963;650;693	S	E9Q4M2	S963	Hormone-sensitive lipase	Lipe	PRVRAAFPEGFHPRRSSQGVLHMPLYTSPIV	RS(0.819)S(0.172)QGVLHMPLY(0.008)T(0.001)S(0.001)PIVK	RS(6.78)S(-6.78)QGVLHMPLY(-20.25)T(-31.06)S(-31.38)PIVK	2	0.00115371	72.433	4	524.021	0.7708	+	-0.335264	-0.075545	-0.237091	3	-0.215967	0.131142	0.147163	-0.276186	-0.127459	-0.0665868	3	-0.156744	0.107825	0.26564
9442	Q8R1N0	187	S	Q8R1N0	S187	Zinc finger protein 830	Znf830	SKHLPDAQGKEHSLASPRETTSNVLPNDPFN	EHS(0.026)LAS(0.867)PRET(0.036)T(0.036)S(0.036)NVLPNDPFNTNPPK	EHS(-15.31)LAS(13.84)PRET(-13.84)T(-13.84)S(-13.84)NVLPNDPFNT(-59.64)NPPK	6	1.57625e-06	102.53	3	981.461	-0.51129	+		0.315739	0.318424	2	0.317082	0.00189832	0.0925776		0.0796876	0.179142	2	0.129415	0.0703249	0.265719
7420	Q6P6I6;Q6P6I6-2	165;61	S	Q6P6I6	S165	DNA-directed RNA polymerase II subunit GRINL1A	Polr2m	VNSSPAAHIRARAPSSEVKEHLPQHSVSSQE	ARAPS(0.207)S(0.793)EVK	ARAPS(-5.84)S(5.84)EVK	6	0.000112992	142.12	2	512.745	2.0351	+	0.385481	0.394487	0.320036	3	0.366668	0.0406345	0.0634622	0.109221	0.102674	0.152033	3	0.121309	0.0268079	0.266193
2437	E9Q6J5	2920	S	E9Q6J5	S2920		Bod1l	QKSVSETSEDKKDEESDEEEEEEEEEEPLGA	SVSETSEDKKDEES(1)DEEEEEEEEEEPLGATTR	S(-51.02)VS(-51.02)ET(-50.7)S(-49.52)EDKKDEES(45.49)DEEEEEEEEEEPLGAT(-45.49)T(-49.84)R	14	0.00039642	78.942	3	1251.17	1.9623	+	-0.544287	-0.83654	-0.54893	3	-0.643253	0.167408	0.0076334	-0.0425361	-0.487783	-0.190668	3	-0.240329	0.226739	0.267005
5520	Q00547;Q00547-2	20;20	S	Q00547	S20	Hyaluronan mediated motility receptor	Hmmr	KAPLKRFNDPSGCAPSPGAYDVKTSEATKGP	RFNDPSGCAPS(0.999)PGAY(0.001)DVK	RFNDPS(-37.43)GCAPS(29.37)PGAY(-29.37)DVK	11	2.9556e-05	112.16	3	673.287	0.68773	+	-0.393232	-0.307188	-0.334172	3	-0.344864	0.0440069	0.0506871	-0.188816	-0.0682117	-0.215955	3	-0.157661	0.0786446	0.267005
517	Q5HZG4;A2ASY0	758;605	S	Q5HZG4	S758	Transcription initiation factor TFIID subunit 3	Taf3	HKHEKIKVEPVIPAPSPVIPRLTLRVGAGQD	IKVEPVIPAPS(1)PVIPR	IKVEPVIPAPS(105.79)PVIPR	11	7.2238e-05	120.7	3	598.009	2.4947	+	-0.206314	-0.257401	-0.273996	3	-0.245904	0.0352752	0.0876929	-0.121199	-0.0918583	-0.193347	3	-0.135468	0.0522275	0.267005
12701	P33611;Q8C2T6	130;130	T	P33611	T130	DNA polymerase alpha subunit B	Pola2	TPSKGPLKRVSSTPETPLTKRSVAARSPRQL	RVS(0.333)S(0.333)T(0.333)PET(1)PLTK	RVS(0)S(0)T(0)PET(40.38)PLT(-40.38)K	8	0.0178373	77.137	3	492.556	-0.54341	+	-0.353655		-0.12346	2	-0.238557	0.162773	0.0916157	-0.133411		-0.069298	2	-0.101355	0.0453348	0.267005
5426	P83741;P83741-3;P83741-4;P83741-2;P83741-5	2281;2539;2032;2530;2099	S	P83741	S2281	Serine/threonine-protein kinase WNK1	Wnk1	KGHMNYEGPGMARKFSAPGQLCVPMTSNLGG	KFS(1)APGQLCVPMTSNLGGSTPISAASATSLGHFTK	KFS(43.02)APGQLCVPMT(-43.02)S(-43.02)NLGGS(-55.85)T(-57.1)PIS(-61.54)AAS(-63.8)AT(-63.15)S(-63.15)LGHFT(-63.75)K	3	5.61367e-16	88.587	5	720.95	0.47623	+	-0.551247	-0.0676074	-0.29088	3	-0.303245	0.242057	0.130364	-0.355375	-0.140249	-0.0570953	3	-0.18424	0.153929	0.267005
2646	E9Q9B7	1549	S	E9Q9B7	S1549		Kidins220	GSGLRYQKLPSDEDESGTEESDNTPLLKDDK	YQKLPSDEDES(0.866)GT(0.099)EES(0.034)DNTPLLK	Y(-53.49)QKLPS(-44.62)DEDES(9.4)GT(-9.4)EES(-14.01)DNT(-36.86)PLLK	11	9.12282e-05	81.904	3	892.392	0.29582	+	-0.0906045	-0.169007		2	-0.129806	0.0554392	0.276438	-0.133219	-0.132232		2	-0.132726	0.000698176	0.267005
5688	Q3B7Z2	188	S	Q3B7Z2	S188	Oxysterol-binding protein 1	Osbp	ALELAKAKAVKMLAESDDSGDEESVSQTDKT	MLAES(1)DDS(1)GDEESVSQTDKTELQSTLR	MLAES(43.6)DDS(35.6)GDEES(-35.6)VS(-40.34)QT(-44.68)DKT(-55.31)ELQS(-62.13)T(-62.24)LR	5	0.00156211	83.31	3	1044.43	-0.96876	+	0.0622811	-0.241595		2	-0.0896571	0.214873	0.795699	-0.0744507	-0.332743		2	-0.203597	0.18264	0.267005
5941	Q3U8K7;Q3U8K7-5;Q3U8K7-3;Q3U8K7-2;H3BLE5	376;353;353;376;376	S	Q3U8K7	S376	Histone-lysine N-methyltransferase SUV420H1	Suv420h1	RLKKLGDSSKNSDSQSVSSNTDADTTQEKDN	NSDS(0.002)QS(0.998)VS(0.054)S(0.94)NT(0.006)DADTTQEK	NS(-64.17)DS(-26.62)QS(26.62)VS(-12.38)S(12.38)NT(-22.32)DADT(-55.8)T(-60.85)QEK	6	1.56944e-40	160.69	2	1087.39	-0.26771	+		-0.841095	0.360294	2	-0.2404	0.849511	0.872932		-0.842604	-0.0445006	2	-0.443552	0.564344	0.267005
5942	Q3U8K7;Q3U8K7-5;Q3U8K7-3;Q3U8K7-2;H3BLE5	379;356;356;379;379	S	Q3U8K7	S379	Histone-lysine N-methyltransferase SUV420H1	Suv420h1	KLGDSSKNSDSQSVSSNTDADTTQEKDNATS	NSDS(0.002)QS(0.998)VS(0.054)S(0.94)NT(0.006)DADTTQEK	NS(-64.17)DS(-26.62)QS(26.62)VS(-12.38)S(12.38)NT(-22.32)DADT(-55.8)T(-60.85)QEK	9	1.56944e-40	160.69	2	1087.39	-0.26771	+		-0.841095	0.360294	2	-0.2404	0.849511	0.872932		-0.842604	-0.0445006	2	-0.443552	0.564344	0.267005
13937	Q8VDD5	1939	T	Q8VDD5	T1939	Myosin-9	Myh9	GDLPFVVTRRIVRKGTGDCSDEEVDGKADGA	KGT(0.95)GDCS(0.05)DEEVDGKADGADAK	KGT(12.78)GDCS(-12.78)DEEVDGKADGADAK	3	0.000153527	101.2	3	735.626	0.48865	+		-0.146247	0.217965	2	0.0358589	0.257537	0.920212		-0.164855	-0.0972573	2	-0.131056	0.0477988	0.267005
5051	P54227;D3Z1Z8;D3Z5N2	63;63;63	S	P54227	S63	Stathmin	Stmn1	EEIQKKLEAAEERRKSHEAEVLKQLAEKREH	S(1)HEAEVLK	S(130.98)HEAEVLK	1	0.000455692	143.4	2	496.726	0.16901	+	0.0329007	0.0824622	0.102505	3	0.0726226	0.0358301	0.700069	0.177577	0.0594498	0.166853	3	0.134627	0.0653254	0.267387
928	B2RQG2	1127	S	B2RQG2	S1127		Phf3	SPKTVKVVVGGARKHSDNEAESLADALSSTT	KHS(0.993)DNEAES(0.007)LADALSSTTNILTSDLFEEEK	KHS(21.31)DNEAES(-21.31)LADALS(-42.29)S(-47.79)T(-46.61)T(-42.29)NILT(-74.35)S(-77.38)DLFEEEK	3	4.15731e-20	102.46	4	844.384	-1.5904	+	0.565009	0.419526	0.646584	3	0.543706	0.115018	0.0220566	0.377651	0.0684456	0.118438	3	0.188178	0.165981	0.268152
13263	Q62261-2	6	T	Q62261-2	T6	Spectrin beta chain, non-erythrocytic 1	Sptbn1	__________MELQRTSSISGPLSPAYTGQV	T(0.762)S(0.233)S(0.233)IS(0.659)GPLS(0.113)PAYTGQVPYNYNQLEGR	T(7.17)S(-6.52)S(-6.52)IS(6.52)GPLS(-7.82)PAY(-53.72)T(-64.49)GQVPY(-96.55)NY(-102.76)NQLEGR	1	2.36904e-100	177.24	2	1480.15	-0.60531	+	0.5989	0.296709		2	0.447804	0.213681	0.0441765	0.0827151	0.13491		2	0.108812	0.0369073	0.268152
2357	E9Q5F9-2;E9Q5F9;G3UZ69	624;624;341	S	E9Q5F9-2	S624		Setd2	REKTGSPTPSNQLNDSPTFKKLDESPVLKPE	TGSPTPSNQLNDS(1)PTFK	T(-177.3)GS(-184.43)PT(-130.38)PS(-103.46)NQLNDS(44.76)PT(-44.76)FK	13	0	286.67	2	935.915	0.69935	+	0.297979	0.269303	0.284967	3	0.284083	0.0143587	0.109361	0.0505466	0.14712	0.23208	3	0.143249	0.0908287	0.268152
8634	Q8BVL3	421	S	Q8BVL3	S421	Sorting nexin-17	Snx17	RSDSQQAVKSPPLLESPDASRESMVKLSSKL	SPPLLES(1)PDASRESMVK	S(-52.97)PPLLES(41.09)PDAS(-41.09)RES(-50.38)MVK	7	0.000638297	92.932	3	641.636	-2.4489	+	0.277426	0.261191	0.249932	3	0.26285	0.013822	0.12703	0.0977142	0.122478	0.144293	3	0.121495	0.023305	0.268152
8431	Q8BP27;Q8BP27-2	141;125	S	Q8BP27	S141	Swi5-dependent recombination DNA repair protein 1 homolog	Sfr1	LSGTPKERLKKARSSSHSFCSVVKRMKVEND	S(0.003)S(0.019)S(0.979)HSFCSVVK	S(-25.58)S(-17.23)S(17.23)HS(-48.42)FCS(-51.23)VVK	3	0.000827364	107.65	2	652.771	-0.22851	+	0.76619	0.738654	0.078454	3	0.527766	0.389359	0.137989	0.0216734	0.341395	0.493739	3	0.285602	0.240927	0.268152
641	A2RTH5	247	S	A2RTH5	S247		Lcmt1	DDRFGQIMIENLRRRSCDLAGVETCKSLESQ	RRS(1)CDLAGVETCK	RRS(82.64)CDLAGVET(-82.64)CK	3	0.000461915	113.76	3	544.572	-0.55121	+	0.25042	0.182871	0.242179	3	0.225157	0.0368516	0.172535	0.153552	0.113308	0.111579	3	0.126146	0.0237494	0.268152
7569	Q6PIJ4	884	S	Q6PIJ4	S884	Nuclear factor related to kappa-B-binding protein	Nfrkb	PGQTGLTVTNLPAAVSPVSKTAMSSPGNSAP	GQTAAASVQRPGPGQTGLTVT(0.005)NLPAAVS(0.962)PVS(0.033)K	GQT(-65.2)AAAS(-57.58)VQRPGPGQT(-48.71)GLT(-38.89)VT(-23.16)NLPAAVS(14.65)PVS(-14.65)K	28	1.53955e-11	108.46	3	1047.54	2.5612	+	0.176641	0.173215	0.170896	3	0.173584	0.00289033	0.26033	0.105972	0.195485	0.108518	3	0.136658	0.0509609	0.268152
10595	Q9DB52	264	S	Q9DB52	S264	Protein FAM122A	Fam122a	GSSCNSPAKVSTTTDSPVSPAQAASPFIPVD	VS(0.004)T(0.004)T(0.07)T(0.06)DS(0.893)PVS(0.969)PAQAASPFIPVDELSSK	VS(-25.28)T(-25.28)T(-12.42)T(-13.35)DS(12.42)PVS(19.37)PAQAAS(-49.52)PFIPVDELS(-106.85)S(-107.9)K	7	1.17551e-29	129.61	3	964.438	0.66308	+	0.314289	0.166904		2	0.240596	0.104217	0.146921	0.238403	0.0548811		2	0.146642	0.12977	0.268322
5963	Q3UCQ1;Q3UCQ1-2	415;415	S	Q3UCQ1;Q3UCQ1-2	S415	Forkhead box protein K2	Foxk2	SQPKLAVIQEARFAQSAPGSPLSSQPVLITV	FAQS(1)APGS(0.999)PLSSQPVLITVQR	FAQS(85.09)APGS(34.33)PLS(-34.33)S(-36.12)QPVLIT(-91.39)VQR	4	9.77252e-23	147.21	2	1172.06	0.6147	+	-0.484868	-0.461829		2	-0.473348	0.0162915	0.032844	-0.107481	-0.158259		2	-0.13287	0.0359052	0.269144
12089	Q3UIA2;E9QAJ9;Q3UIA2-2;Q3UIA2-4;Q3UIA2-3	736;736;658;658;658	T	Q3UIA2	T736	Rho GTPase-activating protein 17	Arhgap17	GEQGPEPGPTPPQTPTPPSTPPLAKQNPSQS	LGEQGPEPGPTPPQTPT(1)PPS(0.036)T(0.964)PPLAK	LGEQGPEPGPT(-88.25)PPQT(-42.01)PT(42.01)PPS(-14.32)T(14.32)PPLAK	17	7.54449e-55	151.67	3	917.761	-0.88956	+	-0.383535	-0.35248	-0.311181	3	-0.349066	0.0362974	0.0488345	-0.115278	-0.116378	-0.121461	3	-0.117706	0.00329868	0.269144
7088	Q64511	1537	S	Q64511	S1537	DNA topoisomerase 2-beta	Top2b	TTPKGKGRGAKKRKASGSENEGDYNPGRKPS	AS(0.969)GS(0.031)ENEGDYNPGRKPSK	AS(14.94)GS(-14.94)ENEGDY(-45.02)NPGRKPS(-58.95)K	2	0.000152629	113.78	3	658.285	-0.12492	+		-0.326214	-0.304684	2	-0.315449	0.0152241	0.0557418		-0.107672	-0.17771	2	-0.142691	0.0495243	0.269144
6646	Q60596	228	S	Q60596	S228	DNA repair protein XRCC1	Xrcc1	YAAATLQASSAASSASPVPKVVGSSSKPQEP	TSSASTSDPAGPSYAAATLQASS(0.001)AAS(0.004)S(0.008)AS(0.987)PVPK	T(-60.61)S(-60.61)S(-60.61)AS(-60.48)T(-61.9)S(-61.48)DPAGPS(-43.41)Y(-43.41)AAAT(-43.41)LQAS(-35.77)S(-32.73)AAS(-23.81)S(-20.97)AS(20.97)PVPK	29	1.33177e-48	127.14	3	1035.14	-0.013468	+	-0.288556	-0.263787	-0.314857	3	-0.289066	0.0255389	0.0612454	-0.0804822	-0.131115	-0.208844	3	-0.140147	0.064656	0.269144
7344	Q6NZF1	367	S	Q6NZF1	S367	Zinc finger CCCH domain-containing protein 11A	Zc3h11a	LQTKLKAEEPSGADDSPSGTKSSSSVRIKTF	LKAEEPSGADDS(0.998)PS(0.002)GTK	LKAEEPS(-95.48)GADDS(28)PS(-28)GT(-49.54)K	12	2.47293e-11	158.53	3	590.259	0.19772	+	-0.327348	-0.226111	-0.30434	3	-0.285933	0.0530691	0.0643688	-0.1869	-0.0708826	-0.191479	3	-0.149754	0.0683428	0.269144
7110	Q64701	1036	S	Q64701	S1036	Retinoblastoma-like protein 1	Rbl1	QKTKKRVIAISGDADSPAKRLCQENDDVLLK	RVIAISGDADS(1)PAK	RVIAIS(-94.7)GDADS(94.7)PAK	11	7.02062e-14	153.68	3	493.912	-0.39478	+	-0.272304	-0.270795	-0.246745	3	-0.263281	0.0143409	0.0704682	-0.111229	-0.137672	-0.102811	3	-0.117237	0.0181905	0.269144
10913	Q9JJ66	41	S	Q9JJ66	S41	Cell division cycle protein 20 homolog	Cdc20	ARWQRKAKEATGPAPSPMRAANRSHSAGRTP	EATGPAPS(1)PMRAANR	EAT(-47.7)GPAPS(47.7)PMRAANR	8	0.00459103	89.011	2	803.364	0.81422	+	-0.217793	-0.284724	-0.303498	3	-0.268672	0.0450514	0.073071	-0.0844333	-0.159217	-0.13242	3	-0.125357	0.0378887	0.269144
778	Q8R1N4;B1AS63;Q8R1N4-2;Q8R1N4-4	357;106;309;62	S	Q8R1N4	S357	NudC domain-containing protein 3	Nudcd3	SPFRGQRFDPAMFNISPGAVQF_________	FDPAMFNIS(1)PGAVQF	FDPAMFNIS(105.79)PGAVQF	9	1.29911e-55	179.84	2	860.876	2.1898	+	-0.272882	-0.196673	-0.311245	3	-0.260267	0.0583187	0.0809752	-0.0816713	-0.157472	-0.140697	3	-0.126613	0.0398144	0.269144
6642	Q60591;Q60591-2	748;748	S	Q60591	S748	Nuclear factor of activated T-cells, cytoplasmic 2	Nfatc2	FRSGLSSPDARYQQQSPAAALYQRSKSLSPG	YQQQS(1)PAAALYQR	Y(-106.04)QQQS(106.04)PAAALY(-125.03)QR	5	4.12075e-18	151.39	2	802.367	0.29165	+	-0.25678	-0.228354	-0.265125	3	-0.250086	0.0192778	0.0809752	-0.0836817	-0.135827	-0.171873	3	-0.130461	0.0443397	0.269144
11967	E9Q3P4;F6V6F0	2880;34	T	E9Q3P4	T2880		Cenpf	PEVVKKGFADIPTGKTSPYILRRTTMATRTS	GFADIPT(0.006)GKT(0.814)S(0.153)PY(0.027)ILR	GFADIPT(-21.46)GKT(7.26)S(-7.26)PY(-14.8)ILR	10	0.0164082	70.26	3	605.973	-3.1055	+	-0.227304	-0.24043	-0.258374	3	-0.242036	0.0155969	0.0867352	-0.0737184	-0.18301	-0.139281	3	-0.132003	0.0550081	0.269144
4944	P49312;Q5EBP8	286;339	S	P49312	S286	Heterogeneous nuclear ribonucleoprotein A1	Hnrnpa1	SNFGPMKGGNFGGRSSGPYGGGGQYFAKPRN	GGNFGGRS(0.003)S(0.997)GPYGGGGQYFAK	GGNFGGRS(-25.88)S(25.88)GPY(-79.96)GGGGQY(-109.22)FAK	9	2.11252e-10	138.25	3	700.969	0.26371	+	-0.231591	-0.226426	-0.24274	3	-0.233586	0.0083381	0.0908695	-0.0862174	-0.117293	-0.221649	3	-0.14172	0.070943	0.269144
5764	Q3TLR7	722	S	Q3TLR7	S722	Denticleless protein homolog	Dtl	KICTYFRRKTQDDFCSPEHSTEL________	TQDDFCS(1)PEHSTEL	T(-78.02)QDDFCS(56.92)PEHS(-56.92)T(-56.92)EL	7	0.000106393	114.06	2	873.322	0.51029	+	-0.234682	-0.240355	-0.193792	3	-0.222943	0.0254041	0.0948252	-0.079543	-0.211181	-0.106157	3	-0.132294	0.0696026	0.269144
11868	Q8K4B0;F8WHY8;E9PX23	564;547;564	T	Q8K4B0	T564	Metastasis-associated protein MTA1	Mta1	KPDPVKSSSSVLSSLTPAKSAPVINNGSPTI	SSSSVLSSLT(1)PAK	S(-128.67)S(-127.91)S(-127.13)S(-127.13)VLS(-97.31)S(-62.98)LT(62.98)PAK	10	5.1553e-65	191.53	3	448.553	0.96327	+	-0.21349	-0.201453	-0.250932	3	-0.221958	0.0258037	0.102747	-0.115577	-0.103816	-0.153845	3	-0.124413	0.026159	0.269144
4943	P49312;Q5EBP8	285;338	S	P49312	S285	Heterogeneous nuclear ribonucleoprotein A1	Hnrnpa1	SSNFGPMKGGNFGGRSSGPYGGGGQYFAKPR	GGNFGGRS(0.877)S(0.123)GPYGGGGQYFAK	GGNFGGRS(8.51)S(-8.51)GPY(-62.92)GGGGQY(-66.78)FAK	8	3.07917e-05	103.51	3	700.969	-0.41476	+	-0.267904	-0.108842	-0.296226	3	-0.224324	0.101008	0.120614	-0.118232	-0.0859849	-0.241497	3	-0.148571	0.0820752	0.269144
4010	O08583	93	S	O08583	S93	THO complex subunit 4	Alyref	RPKQLPDKWQHDLFDSGFGGGAGVETGGKLL	QLPDKWQHDLFDS(1)GFGGGAGVETGGK	QLPDKWQHDLFDS(71.15)GFGGGAGVET(-71.15)GGK	13	4.5092e-05	80.994	4	696.567	0.49587	+	-0.172967	-0.166203	-0.0332226	3	-0.124131	0.0788014	0.294416	-0.129271	-0.112861	-0.109173	3	-0.117102	0.0106988	0.269144
11165	Q9WUF3	923	S	Q9WUF3	S923	CASP8-associated protein 2	Casp8ap2	CKHLSLDELEEGEIRSDDEESVAQKRLEKSA	HLS(0.017)LDELEEGEIRS(0.981)DDEES(0.002)VAQK	HLS(-17.55)LDELEEGEIRS(17.55)DDEES(-27.76)VAQK	14	0.00261106	65.924	4	677.804	2.0973	+	-0.100814	-0.0900591		2	-0.0954367	0.00760521	0.364147	-0.0816353	-0.241724		2	-0.16168	0.1132	0.269144
991	B2RY04	1755	S	B2RY04	S1755	Dedicator of cytokinesis protein 5	Dock5	KSQVIAEKAPEPDVMSPGKKTQRPKSLQLVD	APEPDVMS(1)PGKK	APEPDVMS(64.52)PGKK	8	0.00454921	73.415	3	445.872	1.3646	+	0.21434	0.190528	0.269961	3	0.224943	0.0407642	0.167586	0.0650019	0.0920536	0.286921	3	0.147992	0.121074	0.270305
2726	Q8BVU0;E9QAU9;E9Q892;B7ZWM8;B2RXP1	324;324;198;324;324	S	Q8BVU0	S324	Leucine-rich repeat and calponin homology domain-containing protein 3	Lrch3	LDSGFNSVDSGDKRWSGNEPTDEFSDLPLRV	RWS(1)GNEPTDEFSDLPLRVAEITK	RWS(36.63)GNEPT(-36.63)DEFS(-75.33)DLPLRVAEIT(-101.57)K	3	1.03418e-05	112.06	4	685.83	-0.49253	+	0.197032	0.1514	0.280611	3	0.209681	0.0655272	0.195015	0.15602	0.0369481	0.274726	3	0.155898	0.118889	0.270305
1717	Q8R0X2;E9PV69	366;336	S	Q8R0X2	S366	CDK2-associated and cullin domain-containing protein 1	Cacul1	GDQSRKRAGDELAYNSPSACASSRGYR____	RAGDELAY(0.001)NS(0.998)PS(0.001)ACASSR	RAGDELAY(-31.16)NS(30.62)PS(-30.62)ACAS(-40.18)S(-40.18)R	10	0.000866966	85.518	3	664.614	-1.9778	+	-0.348509	-0.302474	-0.245611	3	-0.298865	0.0515436	0.0579508	-0.119454	-0.104423	-0.134751	3	-0.119542	0.0151642	0.270889
6107	Q3UMC0	273	S	Q3UMC0	S273	Spermatogenesis-associated protein 5	Spata5	RTVNKAGEVLLDVTQSPRDGSGLGLEESTGL	AGEVLLDVT(0.212)QS(0.787)PRDGS(0.001)GLGLEESTGLK	AGEVLLDVT(-5.7)QS(5.7)PRDGS(-31.01)GLGLEES(-55.68)T(-59.28)GLK	11	4.29428e-06	100.92	3	936.794	0.12423	+		0.189771	0.160258	2	0.175015	0.0208688	0.286849		0.130205	0.125031	2	0.127618	0.00365834	0.27147
9580	Q8VC28;Q9JLI0	232;232	S	Q8VC28;Q9JLI0	S232	Aldo-keto reductase family 1 member C13	Akr1c13;Akr1c12	GALGTQRYKEWVDQNSPVLLNDPVLCDVAKK;GALGTQRYKEWVDQNSPVLLNDPVLCDVAKR	EWVDQNS(1)PVLLNDPVLCDVAK	EWVDQNS(56.02)PVLLNDPVLCDVAK	7	0.000241759	88.574	3	831.057	1.5236	+		-0.0838146	-0.0014741	2	-0.0426444	0.0582235	0.625467		0.132644	0.12343	2	0.128037	0.00651517	0.27147
9723	Q91VJ4	264	S	Q91VJ4	S264	Serine/threonine-protein kinase 38	Stk38	LNHSLPSDFTFQNMNSKRKAETWKRNRRQLA	NLNHSLPSDFTFQNMNS(1)K	NLNHS(-147.36)LPS(-131.78)DFT(-92.01)FQNMNS(92.01)K	17	2.78802e-181	214.79	3	725.317	-0.36055	+	-0.142643	-0.286006	-0.138366	3	-0.189005	0.0840323	0.137551	-0.12064	-0.284498	-0.0513069	3	-0.152148	0.119746	0.27157
4826	P42128	243	S	P42128	S243	Forkhead box protein K1	Foxk1	PSPTGTISVPNSCPASPRGAGSSSYRFVQNV	SLVSPIPSPTGTISVPNS(0.004)CPAS(0.996)PR	S(-110.22)LVS(-110.22)PIPS(-89.28)PT(-83.92)GT(-79.12)IS(-68.92)VPNS(-23.46)CPAS(23.46)PR	22	4.22608e-52	154.35	2	1251.11	-0.082458	+	0.34735	0.262451	0.247721	3	0.285841	0.0537751	0.112743	0.0905349	0.151431	0.132167	3	0.124711	0.0311253	0.272053
6203	Q3UZA1;Q3UZA1-2	82;52	S	Q3UZA1	S82	CapZ-interacting protein	Rcsd1	KSPSGASHPPKIKVKSSPLIEKLQANLAFDP	S(0.996)S(0.004)PLIEK	S(24.18)S(-24.18)PLIEK	1	0.000583881	128.6	2	427.207	-0.50755	+	0.529379	0.504906	0.511365	3	0.515216	0.0126832	0.0229732	0.128556	0.155366	0.102362	3	0.128761	0.0265028	0.272567
7720	Q78XR0;F6VKM0	159;81	S	Q78XR0	S159	Trafficking protein particle complex subunit 6A	Trappc6a	VASLPACKFQVVIQKS_______________	FQVVIQKS(1)	FQVVIQKS(75.42)	8	0.00179355	108.7	3	343.511	-1.2638	+	0.283482	0.256958	0.23171	3	0.257383	0.0258888	0.131737	0.097187	0.124406	0.139884	3	0.120492	0.0216158	0.272567
8486	Q8BS90;Q8BS90-2	250;250	S	Q8BS90	S250	Protein aurora borealis	Bora	NSVKKYSLGSVTTSPSAISSPTFSPIALQGG	YSLGSVT(0.002)T(0.034)S(0.187)PS(0.777)AISSPTFSPIALQGGK	Y(-68.82)S(-68.04)LGS(-45.99)VT(-26.71)T(-13.59)S(-6.18)PS(6.18)AIS(-33.42)S(-33.42)PT(-62.58)FS(-60.15)PIALQGGK	11	3.59438e-45	141.5	3	911.784	0.025015	+	0.243336	0.24398	0.152144	3	0.213153	0.0528368	0.199198	0.0887465	0.074853	0.231347	3	0.131649	0.0866202	0.272567
2405	E9Q6E5;Q3UIX4;B7ZNC5;Q8BV04;F6XR65	484;449;349;396;197	S	E9Q6E5;F6XR65	S484		Srsf11	EKRPTEAVSPKTKECSVEKGVGDLRESKVNG	TKECS(1)VEK	T(-33.6)KECS(33.6)VEK	5	0.00417322	94.767	2	530.723	0.1532	+	0.140854	0.185684	-0.0538848	3	0.0908842	0.127362	0.773128	0.167478	0.175135	0.0820483	3	0.141554	0.0516752	0.273978
6867	Q61686	93	S	Q61686	S93	Chromobox protein homolog 5	Cbx5	NNKPREKSEGNKRKSSFSNSADDIKSKKKRE	S(0.004)S(0.994)FS(0.001)NSADDIK	S(-23.9)S(23.9)FS(-28.45)NS(-39.32)ADDIK	2	1.91972e-12	170	2	625.75	0.50581	+	0.622038	0.514269	0.494755	3	0.543687	0.0685515	0.020996	0.194588	0.224507	0.0696114	3	0.162902	0.0821654	0.274151
14264	Q9ERU9	2342	T	Q9ERU9	T2342	E3 SUMO-protein ligase RanBP2;Putative peptidyl-prolyl cis-trans isomerase	Ranbp2	DTTSEAGETSSTSETTPKAVVSPPKFVFGSE	TDLTQGDEVIDTTSEAGETSSTS(0.002)ET(0.007)T(0.991)PK	T(-109.54)DLT(-107.72)QGDEVIDT(-95.25)T(-92.37)S(-88.52)EAGET(-52.18)S(-46.77)S(-40.06)T(-40.06)S(-27.28)ET(-21.36)T(21.36)PK	26	1.07766e-26	113.13	3	994.094	1.6129	+	0.883826	0.732474	0.839141	3	0.818481	0.0777625	0.00422431	0.135121	0.0794345	0.14955	3	0.121369	0.0370256	0.274843
1871	P18653;G3UZI3;E9PWV3;Q505N6;F6RQA2;F6Q8A4	369;270;364;380;381;386	S	P18653	S369	Ribosomal protein S6 kinase alpha-1;Ribosomal protein S6 kinase	Rps6ka1	GIPPSAGAHQLFRGFSFVATGLMEDDGKPRT	GFS(1)FVATGLMEDDGKPR	GFS(76.3)FVAT(-76.3)GLMEDDGKPR	3	8.50258e-72	203.89	3	636.285	0.30179	+	0.345452	0.458366	0.664863	3	0.48956	0.161974	0.0309204	0.113351	0.0530016	0.255035	3	0.140463	0.103709	0.274843
4357	P05627	73	S	P05627	S73	Transcription factor AP-1	Jun	SDLLTSPDVGLLKLASPELERLIIQSSNGHI	LAS(1)PELER	LAS(80.74)PELER	3	4.34567e-06	131.42	2	497.734	0.45684	+	0.314541	0.324756	0.418881	3	0.352726	0.0575193	0.0668514	0.14727	0.063971	0.167842	3	0.126361	0.0550019	0.274843
13502	Q80UG5-3;Q80UG5;A2A6U3	42;49;31	T	Q80UG5-3	T42	Septin-9	2014-09-09	EEIEPPNSTPPRRVQTPLLRATVASSSQKFQ	RVQT(1)PLLR	RVQT(65.24)PLLR	4	0.00654749	87.568	3	354.865	-1.6735	+	0.146655	0.106157	0.112625	3	0.121812	0.0217562	0.414908	0.149801	0.0881715	0.13095	3	0.122974	0.0315795	0.274843
6409	Q5DTW7;Q5DTW7-2;Q5DTW7-3	1480;1327;1478	S	Q5DTW7	S1480	Uncharacterized protein KIAA1551	Kiaa1551	ESSQRDSADSRLSKRSLSADEFEILQNPVKE	RS(0.825)LS(0.175)ADEFEILQNPVK	RS(6.75)LS(-6.75)ADEFEILQNPVK	2	9.88724e-83	191.48	3	642.65	-0.004126	+	0.162505	0.140854	0.0925349	3	0.131964	0.0358219	0.395332	0.225687	0.101781	0.0973282	3	0.141599	0.0728567	0.276465
8327	Q8BJ05;Q8BJ05-2;Q8BJ05-3	85;85;85	S	Q8BJ05	S85	Zinc finger CCCH domain-containing protein 14	Zc3h14	LDKLRSVTTEPSSLKSPDASIFDSHVPSNKS	LRS(0.01)VT(0.01)T(0.007)EPS(0.033)S(0.033)LKS(0.904)PDAS(0.003)IFDSHVPSNK	LRS(-19.65)VT(-19.65)T(-21.06)EPS(-14.33)S(-14.33)LKS(14.33)PDAS(-24.86)IFDS(-45.16)HVPS(-76.71)NK	13	8.54598e-05	89.631	4	745.617	-0.26006	+	0.130591	0.223807	0.294153	3	0.216184	0.0820472	0.188509	0.0653753	0.0969448	0.242824	3	0.135048	0.0946622	0.277262
9214	Q8K0E1	38	S	Q8K0E1	S38	BTB/POZ domain-containing protein KCTD15	Kctd15	EGGNMSRLSLTRSPVSPLAAQGIPLPAQLTK	S(0.015)PVS(0.985)PLAAQGIPLPAQLTK	S(-18.08)PVS(18.08)PLAAQGIPLPAQLT(-62.02)K	4	2.36821e-05	101.05	3	656.69	1.0334	+	0.220814	0.185712	0.275192	3	0.227239	0.0450846	0.166536	0.137827	0.0857542	0.138203	3	0.120595	0.0301733	0.277371
3555	P59281;P59281-2;H7BX46;G3X932	282;282;284;284	S	P59281	S282	Rho GTPase-activating protein 39	Arhgap39	RPSPFLRRAELSGNCSPLLIQPRKPSSDSQP	RAELS(0.004)GNCS(0.996)PLLIQPR	RAELS(-23.76)GNCS(23.76)PLLIQPR	9	0.00328082	73.758	3	630.98	1.498	+	0.246942	0.175425	0.0817232	3	0.16803	0.082857	0.32934	0.153948	0.0943313	0.120468	3	0.122916	0.0298834	0.277371
4882	P47809;B1ATL6	88;99	S	P47809	S88	Dual specificity mitogen-activated protein kinase kinase 4	Map2k4	RLRTHSIESSGKLKISPEQHWDFTAEDLKDL	LKIS(1)PEQHWDFTAEDLK	LKIS(67.9)PEQHWDFT(-67.9)AEDLK	4	6.71525e-05	101.53	3	713.005	0.84225	+	0.0731683	0.094541	0.0683438	3	0.0786844	0.0139425	0.630606	0.0657491	0.186533	0.15001	3	0.134097	0.0619441	0.277371
6279	Q4V9W2	97	S	Q4V9W2	S97	Protein SREK1IP1	Srek1ip1	REKIKLKKRRKRSYSSATEEDSAKQKKQKYQ	SYS(1)S(1)ATEEDSAK	S(-33.75)Y(-77.35)S(33.75)S(43.64)AT(-43.64)EEDS(-84.28)AK	4	1.65121e-19	156.29	2	717.739	0.70762	+	-0.414844	-0.388255	-0.371327	3	-0.391475	0.0219367	0.0430854	-0.0386599	-0.407845	-0.225025	3	-0.223843	0.184596	0.277622
11585	A2AUP1;A2AUP3;Q7TS91;A2AUP5;A2AUP4;A7UAK8;A7UAK5	463;463;463;463;492;492;492	T	A2AUP1	T463		Pfkfb3	DAKKGPNPLMRRNSVTPLASPEPTKKPRINS	RNS(0.22)VT(0.78)PLASPEPTK	RNS(-5.49)VT(5.49)PLAS(-65.68)PEPT(-98.22)K	5	5.16657e-05	122.64	3	526.263	0.041366	+	0.331529	0.476368	0.447417	3	0.418438	0.076645	0.0433354	0.0770048	0.133858	0.157466	3	0.122776	0.0413593	0.277691
11119	Q9R1T2;Q9R1T2-2	189;189	S	Q9R1T2	S189	SUMO-activating enzyme subunit 1;SUMO-activating enzyme subunit 1, N-terminally processed	Sae1	GEHEFVEEKTKVAKVSQGVEDGPEAKRAKLD	VAKVS(1)QGVEDGPEAK	VAKVS(73.35)QGVEDGPEAK	5	0.0104834	73.346	3	531.922	0.48661	+	0.339332	0.298023	0.3083	3	0.315218	0.0215061	0.0873996	0.0586476	0.133762	0.199771	3	0.130727	0.0706107	0.277691
1988	E9PZ21	36	S	E9PZ21	S36		Rbms1	RKQQSLVPAHPMAPPSPSTTSSNNNSSSSSN	QQSLVPAHPMAPPS(0.85)PS(0.062)T(0.018)T(0.018)S(0.018)S(0.018)NNNS(0.007)S(0.003)S(0.003)S(0.002)S(0.001)NSGWDQLSK	QQS(-56.04)LVPAHPMAPPS(11.34)PS(-11.34)T(-16.73)T(-16.73)S(-16.73)S(-16.73)NNNS(-21.01)S(-25.19)S(-25.19)S(-26.05)S(-30.07)NS(-38.18)GWDQLS(-48.86)K	14	7.00835e-37	97.593	3	1298.24	0.61188	+	0.301073		0.207566	2	0.25432	0.0661195	0.151259	0.0894343		0.179405	2	0.134419	0.0636185	0.277691
1899	Q8K4B0;F8WHY8;E9PX23	562;545;562	S	Q8K4B0	S562	Metastasis-associated protein MTA1	Mta1	PPKPDPVKSSSSVLSSLTPAKSAPVINNGSP	SSSSVLS(0.006)S(0.945)LT(0.049)PAK	S(-110.56)S(-98.25)S(-80.3)S(-58.8)VLS(-22.35)S(12.81)LT(-12.81)PAK	8	6.26143e-19	158.91	2	672.326	-0.070721	+	-0.208555	-0.210814		2	-0.209685	0.00159756	0.122179	-0.118165	-0.13713		2	-0.127648	0.0134096	0.278444
10040	Q99KZ6	88	S	Q99KZ6	S88	Zinc finger protein 639	Znf639	DGTKARNRNQSYLVPSPVLRILDHTVFSTEK	NQSYLVPS(1)PVLR	NQS(-71.96)Y(-79.12)LVPS(71.96)PVLR	8	0.000181641	114.28	2	726.866	-1.6979	+	0.179523	0.235907	0.279493	3	0.231641	0.0501215	0.159172	0.123349	0.0767132	0.161724	3	0.120596	0.0425723	0.280359
14379	Q9WVM1	585	T	Q9WVM1	T585	Rac GTPase-activating protein 1	Racgap1	SLLGPVTTPEFQLVKTPLSSSLSQRLYNLSK	VSLLGPVT(0.111)T(0.889)PEFQLVKT(0.967)PLS(0.021)S(0.008)S(0.003)LS(0.001)QR	VS(-39.7)LLGPVT(-9.03)T(9.03)PEFQLVKT(16.7)PLS(-16.7)S(-20.95)S(-25.13)LS(-29.22)QR	17	5.83797e-05	87.652	4	736.876	1.5431	+	-0.424766	-0.49147		2	-0.458118	0.0471671	0.032844	-0.0680745	-0.345746		2	-0.20691	0.196344	0.281024
11968	E9Q3P4;E9PY14	154;154	T	E9Q3P4	T154		Cenpf	LNPCSTPQKLFATPLTPSSTYEDLKEKYNKE	LFATPLT(1)PSSTYEDLK	LFAT(-88.12)PLT(38.01)PS(-38.01)S(-52.08)T(-57.52)Y(-91.6)EDLK	7	7.61784e-231	239.8	2	931.945	0.037756	+	-0.298458	-0.252239	-0.371271	3	-0.307323	0.0600093	0.0590624	-0.0962146	-0.130281	-0.11952	3	-0.115339	0.0174141	0.281024
12332	G3X8Q1	2121	T	G3X8Q1	T2121		Cabin1	SATTKSPPEITVTPPTPTLLSPKGSISEETK	SPPEITVTPPT(0.993)PT(0.135)LLS(0.486)PKGS(0.156)IS(0.156)EET(0.073)K	S(-62.98)PPEIT(-56.8)VT(-34.99)PPT(22.07)PT(-5.73)LLS(4.94)PKGS(-4.94)IS(-4.94)EET(-8.24)K	11	2.03837e-15	141.08	4	717.35	-1.1648	+	-0.192932	-0.198857	-0.536319	3	-0.309369	0.196566	0.0908695	-0.106837	-0.102824	-0.154819	3	-0.121493	0.0289309	0.281024
9011	Q8CFC7;Q8CFC7-2;Q8CFC7-3	541;541;541	S	Q8CFC7	S541	CLK4-associating serine/arginine rich protein	Clasrp	HSPSPPREKLTRPAASPAVGEKLKKTEPAAG	LTRPAAS(1)PAVGEK	LT(-56.19)RPAAS(56.19)PAVGEK	7	0.000244637	113.86	2	688.85	-2.4479	+	-0.268613	-0.195179	-0.225542	3	-0.229778	0.0368995	0.0948111	-0.140885	-0.0953818	-0.111599	3	-0.115955	0.0230623	0.281024
10353	Q9CZJ1	241	S	Q9CZJ1	S241	Probable U3 small nucleolar RNA-associated protein 11	Utp11l	MDKTQKVKVKKETVNSPAIYRFQTRRKR___	ETVNS(1)PAIYR	ET(-46.99)VNS(46.99)PAIY(-77.41)R	5	0.000116175	118.52	2	615.282	1.1391	+	-0.316233	-0.176748	-0.218036	3	-0.237006	0.0716513	0.0950901	-0.196535	-0.0967526	-0.0891984	3	-0.127495	0.0599095	0.281024
11154	Q9WU62;Q9WU62-2	284;284	S	Q9WU62	S284	Inner centromere protein	Incenp	TTAKSPLGNIRSVRRSLISQDSQVPLASKYN	S(0.085)VRRS(0.914)LIS(0.002)QDSQVPLASK	S(-10.34)VRRS(10.34)LIS(-26.75)QDS(-46.46)QVPLAS(-72.44)K	5	0.00309521	93.371	3	684.36	0.32557	+		-0.145105	-0.241696	2	-0.193401	0.0682999	0.140438		-0.103976	-0.168969	2	-0.136472	0.045957	0.281024
2533	E9Q7Y4	157	S	E9Q7Y4	S157		A430078G23Rik	GACLPRTLASLALNLSGNGQKIWTQGCLPVS	TLASLALNLS(1)GNGQK	T(-77.02)LAS(-83)LALNLS(77.02)GNGQK	10	5.35248e-05	122.64	3	522.934	-0.43046	+	-0.223502	-0.12679		2	-0.175146	0.0683859	0.176342	-0.167051	-0.104964		2	-0.136008	0.0439021	0.281024
2763	Q3UHX0;E9QKD1	787;805	S	Q3UHX0	S787	Nucleolar protein 8	Nol8	PEDKKTHIVFASDNESETEETSTQEQSCPEK	KT(0.002)HIVFAS(0.856)DNES(0.944)ET(0.157)EET(0.037)S(0.003)T(0.001)QEQSCPEK	KT(-30)HIVFAS(8.77)DNES(14.17)ET(-8.77)EET(-17.2)S(-31.21)T(-33.62)QEQS(-41.27)CPEK	12	3.90529e-06	86.531	3	1091.11	0.82936	+	-0.0222353	-0.456366	-0.0430084	3	-0.17387	0.244869	0.392955	-0.0822467	-0.438529	-0.063896	3	-0.194891	0.211196	0.281024
5195	P61082;F6YXS3;F7CDT0;F6WMC0	50;110;38;10	S	P61082	S50	NEDD8-conjugating enzyme Ubc12	Ube2m	QKDINELNLPKTCDISFSDPDDLLNFKLVIC	TCDIS(0.995)FS(0.005)DPDDLLNFK	T(-35.75)CDIS(23.37)FS(-23.37)DPDDLLNFK	5	8.84785e-99	167.53	2	983.911	2.6356	+	-0.0532678	-0.0740746		2	-0.0636712	0.0147126	0.524421	-0.202488	-0.096026		2	-0.149257	0.0752802	0.281024
12431	Q6ZQ58;J3QNB1	842;842	T	Q6ZQ58	T842	La-related protein 1	Larp1	SSPSEGTPAVGSYGCTPQSLPKFQHPSHELL	T(0.542)AS(0.113)IS(0.113)S(0.113)S(0.025)PS(0.006)EGT(0.087)PAVGS(0.017)Y(0.015)GCT(0.946)PQS(0.022)LPK	T(6.88)AS(-6.88)IS(-6.88)S(-6.88)S(-13.48)PS(-19.48)EGT(-8.03)PAVGS(-17.77)Y(-18.29)GCT(17.77)PQS(-17.77)LPK	21	1.86012e-36	134.34	3	942.736	0.84182	+	-0.0673081	-0.0969806	0.0509566	3	-0.0377774	0.0782649	0.673839	-0.0715506	-0.217169	-0.108193	3	-0.132304	0.0757444	0.281024
11946	E9Q2I4	696	T	E9Q2I4	T696		Elmsan1	KSAHRTLLRSNSSEVTPPVLSVMGEATPVSI	SNS(0.001)S(0.003)EVT(0.996)PPVLSVMGEATPVSIEPR	S(-35.34)NS(-30.34)S(-25.16)EVT(25.16)PPVLS(-49.66)VMGEAT(-59.65)PVS(-65.74)IEPR	7	3.32818e-12	103.93	2	1332.14	1.1606	+	-0.0339428	0.0212307	-0.108802	3	-0.0405046	0.0652641	0.705977	-0.203713	-0.0764969	-0.123002	3	-0.134404	0.0643697	0.281024
12185	F6S4K9	130	T	F6S4K9	T130		Epb4.1	ECPKQSVVPSQSLMTTPPASPQSFGSGSLSI	QSVVPSQS(0.003)LMT(0.014)T(0.979)PPAS(0.063)PQS(0.286)FGS(0.287)GS(0.287)LS(0.079)INS(0.002)K	QS(-44.29)VVPS(-34.43)QS(-23.7)LMT(-18.55)T(18.55)PPAS(-6.75)PQS(0)FGS(0)GS(0)LS(-5.6)INS(-22.73)K	12	1.11537e-15	83.879	3	1060.48	-1.3263	+	0.0569049	-0.333969		2	-0.138532	0.27639	0.754912	-0.0998187	-0.163284		2	-0.131551	0.0448764	0.281024
4113	O35685	261	S	O35685	S261	Nuclear migration protein nudC	Nudc	LEKINKMEWWNRLVTSDPEINTKKINPENSK	LVT(0.031)S(0.969)DPEINTK	LVT(-15.02)S(15.02)DPEINT(-72.73)K	4	7.65274e-07	135.91	2	648.808	0.89902	+	0.0620176	-0.349265		2	-0.143624	0.290821	0.761888	-0.0783118	-0.235981		2	-0.157146	0.111489	0.281024
9815	Q91YK2	528	S	Q91YK2	S528	Ribosomal RNA processing protein 1 homolog B	Rrp1b	DSSSDLPVQKSGTPTSPVEGKDGQTTLPRCK	SGTPT(0.063)S(0.937)PVEGKDGQTTLPR	S(-61.42)GT(-56.61)PT(-11.71)S(11.71)PVEGKDGQT(-73.88)T(-96.83)LPR	6	2.11541e-72	200.19	2	1004.47	-0.64331	+	0.307667		0.447283	2	0.377475	0.0987234	0.059339	0.0566094		0.319112	2	0.187861	0.185617	0.281722
13399	Q6PFD9	670	T	Q6PFD9	T670	Nuclear pore complex protein Nup98-Nup96;Nuclear pore complex protein Nup98;Nuclear pore complex protein Nup96	Nup98	VSRFYTNPIAKPIPQTPESVGNKNNSSSNVE	FYTNPIAKPIPQT(1)PES(1)VGNK	FY(-74.13)T(-70.74)NPIAKPIPQT(70.74)PES(79.54)VGNK	13	1.06068e-29	161.55	3	787.702	0.10864	+	0.337459	0.335016	0.309485	3	0.32732	0.015494	0.0807044	0.0828202	0.118265	0.157559	3	0.119548	0.0373861	0.281722
14528	P20152;A2AKJ2	53;53	Y	P20152	Y53	Vimentin	Vim	YSLGSALRPSTSRSLYSSSPGGAYVTRSSAV	S(0.004)LY(0.875)S(0.119)S(0.002)S(0.001)PGGAYVTR	S(-23.5)LY(8.68)S(-8.68)S(-26.34)S(-30.89)PGGAY(-56.88)VT(-71.81)R	3	0.00265858	100.4	2	762.84	-0.058869	+	0.0956226	0.175541	-0.0232525	3	0.082637	0.100031	0.763735	0.0668621	0.0954832	0.233833	3	0.132059	0.0892925	0.281722
2623	E9Q983;E9Q3Z5;Q8K4L3;Q8K4L2;F6R6A4	777;1067;1181;1181;168	S	E9Q983	S777	Supervillin	Svil	TQFTVAGRMVKKGLASPTSITPISSPLCSKS	GLAS(1)PTSITPISSPLCSK	GLAS(50.5)PT(-50.5)S(-74.49)IT(-109.23)PIS(-139.09)S(-144.55)PLCS(-174.66)K	4	5.12708e-123	205.55	2	948.463	-1.5541	+	0.436624	0.366871	0.419429	3	0.407641	0.0363396	0.0452537	0.134629	0.11294	0.113177	3	0.120249	0.0124547	0.282702
463	Q80TY0;Q80TY0-4;Q80TY0-2;Q80TY0-3;A2AQ43;A2AQ44;A2AQ42;A2AQ45;A2AQ41;Q80TY0-5	299;220;299;299;299;299;299;299;299;299	S	Q80TY0	S299	Formin-binding protein 1	Fnbp1	FEDYTQPMKRTVSDNSLSSSKEGKPELRFGG	T(0.287)VS(0.713)DNS(1)LSSSK	T(-3.96)VS(3.96)DNS(40.32)LS(-40.32)S(-45.16)S(-49.95)K	6	1.75263e-40	188	2	642.741	0.2874	+	0.0559514	-0.067714	0.619282	3	0.202507	0.366196	0.789525	0.211231	0.0187005	0.5209	3	0.250277	0.253366	0.282702
10992	Q9QXM1;Q9QXM1-3	704;704	S	Q9QXM1	S704	Junction-mediating and -regulatory protein	Jmy	STRLRVAHSRRKSTASPVPCEEQCHSLPTVL	S(0.031)T(0.031)AS(0.938)PVPCEEQCHSLPTVLQGQEK	S(-14.85)T(-14.85)AS(14.85)PVPCEEQCHS(-34.09)LPT(-50.51)VLQGQEK	4	3.17924e-19	98.112	3	921.41	-1.8539	+	-0.298156	-0.250179	-0.367729	3	-0.305354	0.0591046	0.059279	-0.118761	-0.107577	-0.114177	3	-0.113505	0.00562201	0.282735
2358	E9Q5G3	186	S	E9Q5G3	S186		Kif23	LERQKREALPIPKTPSSKRQADPEFADMINV	EALPIPKT(0.082)PS(0.833)S(0.085)K	EALPIPKT(-10.06)PS(9.92)S(-9.92)K	10	0.00468092	82.578	3	449.902	0.7782	+	-0.190003	-0.170664	-0.202788	3	-0.187818	0.016173	0.131992	-0.103222	-0.12593	-0.110287	3	-0.113146	0.011621	0.282735
5704	Q3TCX3	569	S	Q3TCX3	S569	UPF0469 protein KIAA0907	Kiaa0907	KTAEKGFGLVAYAADSSDEEEEHGGHKNASS	GFGLVAYAADS(1)S(1)DEEEEHGGHK	GFGLVAY(-57.85)AADS(57.85)S(63.68)DEEEEHGGHK	11	3.04677e-08	106.35	4	616.989	-0.34685	+	0.0094084	-0.42435	-0.0846478	3	-0.16653	0.228178	0.439456	-0.0777312	-0.435571	-0.0664005	3	-0.193234	0.209946	0.282735
10960	Q9JM14	184	S	Q9JM14	S184	5'(3')-deoxyribonucleotidase, cytosolic type	Nt5c	HNQHLALPPTRRRLLSWSDNWRGIIESKRAS	LLS(0.999)WS(0.001)DNWR	LLS(30.94)WS(-30.94)DNWR	3	0.000313408	117.95	2	628.777	-1.918	+	0.2128	0.237066	0.226089	3	0.225318	0.0121513	0.165652	0.166795	0.117304	0.0980679	3	0.127389	0.0354563	0.28285
5091	P57725;D3Z0Y1	301;430	S	P57725	S301	SAM domain-containing protein SAMSN-1	Samsn1	IADPEDRARLLSAAESLLDEETTVEHEKESV	LLSAAES(1)LLDEETTVEHEK	LLS(-46.25)AAES(46.25)LLDEET(-97.48)T(-109.76)VEHEK	7	1.10222e-182	214.86	3	732.01	0.98088	+	0.289098	0.121855	0.301743	3	0.237565	0.100407	0.174495	0.260175	0.0571714	0.135625	3	0.15099	0.10237	0.28285
11846	E9PVX6	731	T	E9PVX6	T731		Mki67	VLSNSANLSERQLQVTNSGDIPEPITTEILG	QLQVT(0.804)NS(0.195)GDIPEPITTEILGEK	QLQVT(6.15)NS(-6.15)GDIPEPIT(-40.67)T(-45.94)EILGEK	5	1.19837e-05	86.557	3	821.407	-0.25521	+		-0.187454	-0.246695	2	-0.217075	0.0418899	0.113911		-0.167823	-0.0818152	2	-0.124819	0.0608169	0.283442
2306	E9Q6R4;E9Q4N7;E9Q4N6	1566;1567;1085	S	E9Q6R4	S1566		Arid1b	ASFQRSLESRMSPSKSPFLPTMKMQKVMPTV	MS(0.002)PS(0.025)KS(0.973)PFLPTMK	MS(-26.95)PS(-15.94)KS(15.94)PFLPT(-40.38)MK	6	0.0138821	70.41	3	510.908	0.23686	+	0.137702	0.0580842		2	0.0978932	0.0562984	0.501437	0.155697	0.0654303		2	0.110564	0.0638281	0.283968
2133	Q6ZPR5;E9Q1V5;E9Q914;Q6ZPR5-3;Q6ZPR5-2;Q6ZPR5-4;E9Q1T4	130;57;130;130;130;130;101	S	Q6ZPR5	S130	Sphingomyelin phosphodiesterase 4	Smpd4	PGPVKASIQENVLPDSPLYHNKVQFPPTGGL	ASIQENVLPDS(1)PLYHNK	AS(-97.75)IQENVLPDS(57.73)PLY(-57.73)HNK	11	1.08464e-33	153.83	3	668.986	0.30261	+	0.188788	0.217694	0.253459	3	0.219981	0.0323962	0.174495	0.0710872	0.0934567	0.218331	3	0.127625	0.0793459	0.284251
8250	Q8BH48;Q8BH48-2	146;146	S	Q8BH48	S146	Ubiquitin-associated protein 1	Ubap1	TPTRVSSSATKQKVLSPPHTKADFNPADFEC	VLS(1)PPHTK	VLS(52.06)PPHT(-52.06)K	3	2.22722e-13	112.83	3	320.163	-0.95789	+	0.606037	0.550436	0.571606	3	0.576027	0.0280628	0.0161152	0.0862444	0.0941915	0.176448	3	0.118961	0.049943	0.284848
4739	P33611;Q8C2T6	150;150	S	P33611	S150	DNA polymerase alpha subunit B	Pola2	RSVAARSPRQLLSPSSFSPSATPSQKYTSRT	QLLSPS(0.216)S(0.78)FS(0.004)PS(0.001)ATPSQK	QLLS(-56.07)PS(-5.58)S(5.58)FS(-23.1)PS(-31.63)AT(-64.09)PS(-94.37)QK	7	7.81421e-118	201.95	2	921.438	-1.7139	+	-0.23251		-0.33692	2	-0.284715	0.0738287	0.0569971	-0.0749992		-0.127332	2	-0.101165	0.0370046	0.285359
6308	Q4VAC9;Q4VAC9-2;Q4VAC9-5	1141;1140;528	S	Q4VAC9	S1141	Pleckstrin homology domain-containing family G member 3	Plekhg3	VETSPRRFSFSPSAVSPRTTSPGARSSARSP	FSFSPSAVS(1)PR	FS(-104.5)FS(-71.74)PS(-36.99)AVS(36.99)PR	9	3.60893e-17	152.11	2	631.284	-0.22858	+	-0.157478	-0.235271	-0.249883	3	-0.214211	0.0496721	0.111755	-0.110186	-0.108775	-0.121855	3	-0.113605	0.00717944	0.285397
2769	Q8BMG7;E9QKE4	448;449	S	Q8BMG7	S448	Rab3 GTPase-activating protein non-catalytic subunit	Rab3gap2	IVEDLHERVPEKGGFSPFGNTQGPSRVAQFL	GGFS(1)PFGNTQGPSR	GGFS(70.37)PFGNT(-70.37)QGPS(-130.79)R	4	1.36366e-19	157.73	2	744.817	0.032229	+	0.265784	0.20355	0.271168	3	0.246834	0.0375818	0.143695	0.0726964	0.080987	0.244079	3	0.132588	0.0966437	0.285625
553	A2AWA9;A2AWA7;A2AWA9-2;A2AWB0;A2AWA9-3	115;115;115;47;97	S	A2AWA9	S115	Rab GTPase-activating protein 1	Rabgap1	TINPVPLVGLPKPEMSLPVKPGQGDSEVSSP	PEMS(1)LPVK	PEMS(128.6)LPVK	4	0.00189611	128.6	2	498.727	2.6512	+	0.492411	0.0075771		2	0.249994	0.342829	0.49464	0.198843	0.0560278		2	0.127436	0.100986	0.285625
8316	Q8BIL5;Q8BIL5-2;Q8BJ23	167;167;167	S	Q8BIL5	S167	Protein Hook homolog 1	Hook1	VMTAIQELMSKEIVISPASDTVGELEQQLKR	EIVIS(1)PASDTVGELEQQLK	EIVIS(40.68)PAS(-40.68)DT(-45.29)VGELEQQLK	5	3.12876e-12	130.3	2	1068.53	1.0839	+	0.170965	0.321785	0.236602	3	0.243117	0.0756205	0.151539	0.239118	0.110219	0.0873688	3	0.145569	0.0818176	0.286194
9120	Q8CIB6	24	S	Q8CIB6	S24	Transmembrane protein 230	Tmem230	ATGLPSSKVKYSRLASTDDGYIDLQFKKSPP	LAS(0.997)T(0.003)DDGYIDLQFK	LAS(25.46)T(-25.46)DDGY(-176.59)IDLQFK	3	2.0834e-233	248.1	2	833.374	1.6231	+	0.114578	0.194042	0.0513377	3	0.119986	0.0715059	0.479048	0.162077	0.036988	0.229605	3	0.14289	0.0977313	0.286194
11046	Q9QZK7	314	S	Q9QZK7	S314	Docking protein 3	Dok3	LPLTDPGPQSLPLLLSPTQEGPASGLYASVC	KLPLTDPGPQSLPLLLS(0.974)PT(0.025)QEGPASGLYASVCK	KLPLT(-77.2)DPGPQS(-43.46)LPLLLS(15.88)PT(-15.88)QEGPAS(-33.15)GLY(-43.93)AS(-62.04)VCK	17	2.08305e-73	137.36	3	1172.27	-0.19801	+	0.260715	0.211548	-0.00911081	3	0.154384	0.143709	0.527911	0.162046	0.134432	0.090947	3	0.129142	0.0358433	0.286584
12412	H9KV00;Q9QX47;H9KV15;Q9QX47-3;Q9QX47-2;Q9QX47-4;H9KV01	97;97;97;97;97;97;97	T	H9KV00	T97	Protein SON	Son	DLKEASRKSRCVSVQTDPTDEVPTKKSKKHK	S(0.004)RCVS(0.062)VQT(0.872)DPT(0.062)DEVPTKK	S(-23.52)RCVS(-11.48)VQT(11.48)DPT(-11.48)DEVPT(-52.51)KK	8	0.000188216	108.5	3	709.664	0.31564	+	0.313741	0.410558		2	0.362149	0.0684601	0.0554943	0.0581359	0.216799		2	0.137467	0.112192	0.286841
5050	P54227;D3Z1Z8;D3Z5N2	38;38;38	S	P54227	S38	Stathmin	Stmn1	ILSPRSKESVPDFPLSPPKKKDLSLEEIQKK	SKESVPDFPLS(1)PPK	S(-114.9)KES(-115.55)VPDFPLS(114.9)PPK	11	3.42132e-207	244.18	3	536.595	1.1431	+	0.157789	0.176149	0.170921	3	0.168287	0.00945939	0.271594	0.0834513	0.0868224	0.19384	3	0.121371	0.0627827	0.286841
4811	P41230;P41230-3;P41230-2	317;276;317	S	P41230	S317	Lysine-specific demethylase 5C	Kdm5c	PEPCTKMTMRLRRNHSNAQFIESYVCRMCSR	NHS(1)NAQFIESYVCR	NHS(78.76)NAQFIES(-78.76)Y(-108.75)VCR	3	8.79565e-09	134.08	2	902.877	3.4959	+	0.199344	0.181386	0.314222	3	0.231651	0.0720706	0.161154	0.059942	0.0968405	0.251269	3	0.136017	0.101502	0.286891
4024	O08715;O08715-2;O08715-5;O08715-3;O08715-6;O08715-4	395;395;395;428;395;428	S	O08715	S395	A-kinase anchor protein 1, mitochondrial	Akap1	SAEALPPKTYVSCLSSPLSGPTKDQKPKNSA	TYVSCLS(0.019)S(0.981)PLSGPTK	T(-150.35)Y(-169.75)VS(-75.97)CLS(-17.09)S(17.09)PLS(-48.09)GPT(-77.67)K	8	0	298.33	2	838.884	-0.99877	+	0.199591	0.205989	0.112872	3	0.172817	0.0520123	0.2826	0.127366	0.135164	0.10316	3	0.121897	0.0166886	0.286891
8708	Q8BZR9	410	S	Q8BZR9	S410	Uncharacterized protein C17orf85 homolog		DEMDYDLELKMISTPSPKKSMKMTMYADEVE	MIS(0.003)T(0.007)PS(0.99)PKK	MIS(-24.83)T(-21.39)PS(21.39)PKK	6	0.000513704	118.61	3	356.843	-3.0389	+	0.222846	0.163191	0.469813	3	0.285284	0.162567	0.128108	0.0376212	0.146779	0.280462	3	0.154954	0.121626	0.287255
10146	Q99P72;Q99P72-3	690;574	S	Q99P72	S690	Reticulon-4	Rtn4	IACDLIKETKLSTEPSPEFSNYSEIAKFEKS	LSTEPS(1)PEFSNYSEIAKFEK	LS(-51.23)T(-39.81)EPS(39.81)PEFS(-48.47)NY(-54.18)S(-58.51)EIAKFEK	6	2.2946e-09	126.43	3	795.03	0.87771	+	0.0778764	0.315509	0.250805	3	0.21473	0.122855	0.222574	0.0804826	0.160348	0.130235	3	0.123689	0.0403333	0.287255
8456	Q8BQ33	1778	S	Q8BQ33	S1778	Treslin	Ticrr	SAKEESEYKVKRVCDSLSEDPQASKQKECSP	RVCDS(1)LSEDPQASK	RVCDS(34.74)LS(-34.74)EDPQAS(-103.76)K	5	6.35563e-06	135.95	3	557.906	0.38941	+	0.687912	0.643463	0.195159	3	0.508845	0.272567	0.068318	0.0484634	0.105238	0.303137	3	0.152279	0.133695	0.287438
10563	Q9DAM7	107	S	Q9DAM7	S107	UPF0444 transmembrane protein C12orf23 homolog		GVTAVGSAVVNKVPLSGKKKDKSD_______	GGVSAVAGGVTAVGSAVVNKVPLS(1)GK	GGVS(-60.14)AVAGGVT(-46.3)AVGS(-39.57)AVVNKVPLS(39.57)GK	24	1.70166e-05	100.59	3	787.756	0.6147	+	-0.32391	-0.265352	-0.47318	3	-0.354148	0.107163	0.0537856	-0.0716979	-0.11391	-0.356236	3	-0.180615	0.15355	0.287718
8630	Q8BUV8	537	S	Q8BUV8	S537	Protein GPR107	Gpr107	TTSGVMENMKKVKKVSNGAVEPQGSWEGTA_	KVS(1)NGAVEPQGSWEGTA	KVS(34.03)NGAVEPQGS(-34.03)WEGT(-58.73)A	3	0.00550576	76.156	2	898.896	0.66528	+	-0.205275	-0.128439	-0.160799	3	-0.164837	0.038577	0.163565	-0.135482	-0.0864828	-0.127914	3	-0.116627	0.026378	0.287718
408	Q9R207;A2AMG5	433;433	S	Q9R207	S433	Nibrin	Nbn	ASDTLVRGKTPSYQLSPMKFPVANKNKDWTS	GKTPSYQLS(0.999)PMKFPVANK	GKT(-35.49)PS(-36.56)Y(-37.07)QLS(35.49)PMKFPVANK	9	0.000201966	107.15	4	519.011	0.31617	+	-0.147154	-0.145293	-0.195955	3	-0.162801	0.0287274	0.165086	-0.127688	-0.0748943	-0.190556	3	-0.131046	0.0579038	0.287718
10706	Q9EPQ8;Q9EPQ8-2	836;836	S	Q9EPQ8	S836	Transcription factor 20	Tcf20	VSQTNELASRGLLNKSIGSLLENPHWGPWER	S(1)IGSLLENPHWGPWERK	S(38.04)IGS(-38.04)LLENPHWGPWERK	1	8.05402e-05	99.409	3	696.002	-0.95647	+	-0.292822	-0.0545068	-0.171873	3	-0.173067	0.119162	0.202757	-0.158393	-0.0996438	-0.0908222	3	-0.116286	0.036731	0.287718
7722	Q78ZA7	304	S	Q78ZA7	S304	Nucleosome assembly protein 1-like 4	Nap1l4	FFNFFSPLKASGDGESLDEDSEFTLASDFEI	AS(0.005)GDGES(0.995)LDEDS(0.001)EFTLASDFEIGHFFRER	AS(-23.24)GDGES(23.24)LDEDS(-31.28)EFT(-51.85)LAS(-51.85)DFEIGHFFRER	7	6.19962e-05	82.885	4	836.607	-0.70933	+	-0.0607404	-0.177414	-0.0325785	3	-0.0902441	0.0767929	0.409119	-0.0583881	-0.164107	-0.197722	3	-0.140072	0.0727097	0.287718
10101	Q99MU3;Q99MU3-5;Q99MU3-2	444;196;444	S	Q99MU3	S444	Double-stranded RNA-specific adenosine deaminase	Adar	IMEMPSFYSPTLPRCSPYKKLTECQLKNPVS	AIMEMPSFYSPTLPRCS(0.872)PY(0.128)K	AIMEMPS(-48.25)FY(-63.08)S(-60.17)PT(-35.67)LPRCS(8.33)PY(-8.33)K	17	1.40399e-05	100.77	3	819.035	0.6712	+	-0.309565	-0.331894	0.0851546	3	-0.185435	0.234603	0.421113	-0.0651314	-0.126848	-0.318001	3	-0.169993	0.13184	0.287718
12744	P46664	31	T	P46664	T31	Adenylosuccinate synthetase isozyme 2	Adss	GDCGRPRARSGGNRVTVVLGAQWGDEGKGKV	S(0.013)GGNRVT(0.987)VVLGAQWGDEGK	S(-18.78)GGNRVT(18.78)VVLGAQWGDEGK	7	1.5489e-05	112.16	3	670.653	0.10977	+	-0.109132	0.0538464	-0.0225109	3	-0.0259322	0.0815431	0.775328	-0.102296	-0.115052	-0.12156	3	-0.112969	0.00979907	0.287718
10002	Q99K01;Q99K01-3;Q99K01-2;Q99K01-4	652;652;652;652	S	Q99K01	S652	Pyridoxal-dependent decarboxylase domain-containing protein 1	Pdxdc1	VLRQIPVVGSVLNWFSPVQASQKGRSFNLTA	QIPVVGSVLNWFS(1)PVQASQK	QIPVVGS(-100.19)VLNWFS(90.26)PVQAS(-90.26)QK	13	6.87879e-191	229.25	3	755.387	1.9954	+	-0.278404	-0.244529	-0.289143	3	-0.270692	0.0232852	0.0689469	-0.102022	-0.123678	-0.109038	3	-0.111579	0.0110496	0.289241
8656	Q8BX70;Q8BX70-3;Q8BX70-2	736;736;736	S	Q8BX70	S736	Vacuolar protein sorting-associated protein 13C	Vps13c	QLNSKDQGAQKTANASLEEIIDKAYDKFDVE	T(0.002)ANAS(0.998)LEEIIDK	T(-27.02)ANAS(27.02)LEEIIDK	5	0.00256644	79.676	2	692.324	1.3946	+		-0.25055	-0.242988	2	-0.246769	0.00534664	0.0881196		-0.141018	-0.0965277	2	-0.118773	0.0314594	0.290334
12947	Q14AX6;Q14AX6-3	1365;1356	T	Q14AX6	T1365	Cyclin-dependent kinase 12	Cdk12	DERSSGPALTESLVQTPVKNRTFSGSVSHLG	SSGPALTESLVQT(1)PVK	S(-77.42)S(-77)GPALT(-55.4)ES(-57.33)LVQT(55.4)PVK	13	0.00035963	101.28	3	565.285	-0.0038918	+	-0.195315	-0.116134	-0.267969	3	-0.19314	0.0759408	0.145564	-0.102674	-0.084938	-0.216667	3	-0.13476	0.0714862	0.290334
13993	Q91YR7;Q91YR7-2	275;275	T	Q91YR7	T275	Pre-mRNA-processing factor 6	Prpf6	DSVSGQTVVDPKGYLTDLNSMIPTHGGDIND	GY(0.063)LT(0.863)DLNS(0.074)MIPTHGGDINDIKK	GY(-11.33)LT(10.69)DLNS(-10.69)MIPT(-38.53)HGGDINDIKK	4	0.000331291	67.285	4	621.298	-0.46021	+	-0.00553767	0.139155		2	0.0668085	0.102313	0.844379	-0.124211	-0.121248		2	-0.12273	0.00209459	0.290334
6931	Q61937;Q9DAY9;Q5SQB0;Q5SQB5;E9Q5T3	252;252;224;252;232	S	Q61937	S252	Nucleophosmin	Npm1;Gm5611	KGPSSVEDIKAKMQASIEKGGSLPKVEAKFI	MQAS(1)IEK	MQAS(80.69)IEK	4	0.000402074	122.34	2	443.691	0.40624	+	-0.249777	-0.225213	-0.323706	3	-0.266232	0.0512667	0.0758156	-0.0612639	-0.129772	-0.357725	3	-0.18292	0.155212	0.290444
6306	Q4VAC9;Q4VAC9-2;Q4VAC9-5	1136;1135;523	S	Q4VAC9	S1136	Pleckstrin homology domain-containing family G member 3	Plekhg3	KSSAAVETSPRRFSFSPSAVSPRTTSPGARS	RFS(0.011)FS(0.988)PSAVSPR	RFS(-19.35)FS(19.35)PS(-34.18)AVS(-71.14)PR	5	0.000863225	91.969	3	473.226	-0.031818	+	0.207284	0.0498767	0.114345	3	0.123835	0.0791317	0.479048	-0.0636335	-0.133252	-0.244994	3	-0.147293	0.091492	0.290444
10670	Q9DCC8	138	S	Q9DCC8	S138	Mitochondrial import receptor subunit TOM20 homolog	Tomm20	LTKLPTISQRIVSAQSLAEDDVE________	IVS(0.032)AQS(0.968)LAEDDVE	IVS(-14.78)AQS(14.78)LAEDDVE	6	0.00108937	87.99	2	728.316	-0.43493	+	0.306189	0.28346	0.348354	3	0.312667	0.0329286	0.0868369	0.133837	0.0689647	0.155635	3	0.119479	0.0450837	0.292215
1610	Q8BYJ6;Q8BYJ6-2;Q8BYJ6-4;Q8BYJ6-3;H7BX82;E9Q6Q8;E0CX53	276;276;276;276;276;276;276	S	Q8BYJ6	S276	TBC1 domain family member 4	Tbc1d4	SPDDSLPEKADGTVNSPRALPSLASLPALAS	ADGT(0.042)VNS(0.955)PRALPS(0.003)LASLPALASQPALASSR	ADGT(-13.57)VNS(13.57)PRALPS(-25.58)LAS(-54.44)LPALAS(-86.21)QPALAS(-97.2)S(-97.2)R	7	2.77863e-07	100.59	3	1000.18	-0.59557	+	0.160769	0.195263	0.150882	3	0.168971	0.0232999	0.273769	0.041546	0.144263	0.246425	3	0.144078	0.102439	0.292215
5528	Q01320	1211	S	Q01320	S1211	DNA topoisomerase 2-alpha	Top2a	KAKGKKAQMCADVLPSPRGKRVIPQVTVEMK	KAQMCADVLPS(1)PRGK	KAQMCADVLPS(85.05)PRGK	11	5.76048e-23	161.91	3	579.944	-0.55559	+	-0.247329	-0.183566	-0.272399	3	-0.234431	0.0457991	0.095344	-0.0940167	-0.108524	-0.150695	3	-0.117745	0.0294429	0.292242
7013	Q62417-5;Q62417-4;Q62417-6;Q62417-2;E9Q6A3;E9QNA7;Q62417-7	346;376;357;346;376;346;470	S	Q62417-5	S346	Sorbin and SH3 domain-containing protein 1	Sorbs1	GKSSVLTNEKMSSAVSPTPDITSEPPGYIYS	MS(0.066)S(0.066)AVS(0.778)PT(0.091)PDITSEPPGYIYSSNFHAVKR	MS(-10.74)S(-10.74)AVS(9.31)PT(-9.31)PDIT(-40.19)S(-53.35)EPPGY(-78.32)IY(-81.71)S(-81.55)S(-85.96)NFHAVKR	6	1.76613e-11	88.045	4	805.377	0.32623	+		0.251808	0.453939	2	0.352874	0.142928	0.0766833		0.0406814	0.356133	2	0.198407	0.223058	0.292714
8115	Q80YR6	346	S	Q80YR6	S346	DNA endonuclease RBBP8	Rbbp8	ATSTVKAHLGLNTSFSPSLLDIGKKNLLKTA	AHLGLNT(0.513)S(0.513)FS(0.872)PS(0.102)LLDIGKK	AHLGLNT(0)S(0)FS(9.42)PS(-9.42)LLDIGKK	10	6.95821e-05	87.669	4	540.264	-0.89962	+		-0.209096	-0.0503411	2	-0.129718	0.112257	0.285297		-0.127512	-0.108497	2	-0.118004	0.0134451	0.292835
9555	Q8R5H1	229	S	Q8R5H1	S229	Ubiquitin carboxyl-terminal hydrolase 15	Usp15	KNEDGTWPRGPSTPKSPGASNFSTLPKISPS	GPSTPKS(1)PGASNFSTLPK	GPS(-60.31)T(-50.35)PKS(50.35)PGAS(-61.84)NFS(-64.76)T(-70.61)LPK	7	3.40832e-05	129.29	3	618.3	-1.3749	+	0.217379	0.254838	0.393597	3	0.288605	0.0928352	0.108948	0.119358	0.051577	0.216089	3	0.129008	0.0826796	0.293081
11752	P42209;D3Z3V3	316;288	T	P42209	T316	Septin-1	2014-09-01	ARDRASRSKLSRQSATEIPLPMLPLADTEKL	LS(0.032)RQS(0.18)AT(0.789)EIPLPMLPLADTEK	LS(-13.92)RQS(-6.43)AT(6.43)EIPLPMLPLADT(-56.78)EK	7	1.10932e-08	125.37	4	598.306	0.17888	+		0.230653	0.227664	2	0.229158	0.00211398	0.177058		0.198685	0.0948898	2	0.146787	0.073394	0.293081
2735	Q8CG79;E9QJU8	328;334	S	Q8CG79	S328	Apoptosis-stimulating of p53 protein 2	Tp53bp2;Trp53bp2	WKKKAALQQKENLPVSPDGNLPQQAVSAPSR	ENLPVS(1)PDGNLPQQAVSAPSR	ENLPVS(89.14)PDGNLPQQAVS(-89.14)APS(-111.3)R	6	9.3217e-32	146.45	2	1128.54	0.85822	+	0.285287	0.34953		2	0.317409	0.0454266	0.0743691	0.108463	0.089163		2	0.0988128	0.0136468	0.293555
4571	P20152	420	S	P20152	S420	Vimentin	Vim	EGEESRISLPLPTFSSLNLRETNLESLPLVD	ISLPLPTFS(0.026)S(0.974)LNLR	IS(-102.64)LPLPT(-36.66)FS(-15.72)S(15.72)LNLR	10	2.94407e-133	217.65	2	819.437	0.38219	+	0.113174	0.187634	0.22187	3	0.174226	0.0555746	0.260869	0.0414648	0.115511	0.322293	3	0.159756	0.145548	0.293555
8501	Q8BT07;Q8BT07-2	434;433	S	Q8BT07	S434	Centrosomal protein of 55 kDa	Cep55	VKATSPKSPSAALNDSLVECPKCSVQYPATE	SPSAALNDS(1)LVECPK	S(-137.01)PS(-111.6)AALNDS(111.6)LVECPK	9	1.89569e-114	207.1	2	834.371	-1.6594	+	-0.300266	-0.22525	-0.22917	3	-0.251562	0.0422248	0.0805274	-0.106667	-0.123493	-0.0980897	3	-0.109417	0.0129232	0.293699
13345	Q6GQX2	168	T	Q6GQX2	T168	Nck-associated protein 5-like	Nckap5l	CWEQQLRPGGPGPPATPPPALDALSPFLRKK	EVCWEQQLRPGGPGPPAT(1)PPPALDALSPFLRK	EVCWEQQLRPGGPGPPAT(52.09)PPPALDALS(-52.09)PFLRK	18	9.53426e-06	92.798	4	891.198	0.79826	+	0.514893	0.306189	0.338945	3	0.386676	0.112241	0.0627543	0.143779	0.0796515	0.131732	3	0.118387	0.0340828	0.293951
11983	E9Q5C9	504	T	E9Q5C9	T504		Nolc1	PKPPAKKKAAGGAVSTPAPGKKAEAKSSSSS	AAGGAVS(0.189)T(0.811)PAPGK	AAGGAVS(-6.34)T(6.34)PAPGK	8	0.00724674	87.083	2	582.276	1.5168	+		-0.354342	-0.421867	2	-0.388105	0.0477474	0.0470471		-0.106538	-0.137576	2	-0.122057	0.021947	0.294162
10179	Q9CPY3;Q9CPY3-2	178;41	S	Q9CPY3	S178	Sororin	Cdca5	RSFFGFEGPDDLPGVSPVVCSKLIETPKVPA	SFFGFEGPDDLPGVS(1)PVVCSK	S(-123.95)FFGFEGPDDLPGVS(63.94)PVVCS(-63.94)K	15	1.35913e-54	162.11	3	774.345	0.45347	+	-0.30305	-0.25877	-0.371068	3	-0.310962	0.0565657	0.0574554	-0.0896932	-0.100185	-0.173128	3	-0.121002	0.0454462	0.294162
9095	Q8CI08;Q8CI08-2	234;234	S	Q8CI08	S234	SLAIN motif-containing protein 2	Slain2	PVRPPIVKQLILPGNSGNFKSSSDRNPPLSP	QLILPGNS(1)GNFK	QLILPGNS(139.34)GNFK	8	1.1357e-08	139.34	2	684.34	0.24768	+	-0.366835	-0.265921		2	-0.316378	0.071357	0.0606483	-0.0916318	-0.161617		2	-0.126624	0.049487	0.294162
8865	Q8C4M7	186	S	Q8C4M7	S186	Centromere protein U	Mlf1ip	EPVTPRRTRLHSAQLSPVDETPATQSQLKTQ	LHS(1)AQLS(1)PVDETPATQSQLK	LHS(98.22)AQLS(79.13)PVDET(-79.13)PAT(-121.04)QS(-121.79)QLK	7	4.64339e-185	217.09	3	770.685	-2.3533	+	-0.201329	-0.303731	-0.405073	3	-0.303378	0.101873	0.0654998	-0.10161	-0.098057	-0.146097	3	-0.115255	0.0267694	0.294162
11312	Q9Z2P8	41	S	Q9Z2P8	S41	Vesicle-associated membrane protein 5	Vamp5	KVLERHGKLAELEQRSDQLLDMSSAFSKTTK	LAELEQRS(1)DQLLDMSSAFSK	LAELEQRS(83.5)DQLLDMS(-83.5)S(-89.07)AFS(-104.6)K	8	1.00683e-09	136.34	3	783.366	2.1728	+	-0.261989	-0.204447	-0.378997	3	-0.281811	0.0889475	0.0737506	-0.108227	-0.0922179	-0.143889	3	-0.114778	0.026451	0.294162
8269	Q8BHG9	94	S	Q8BHG9	S94	CGG triplet repeat-binding protein 1	Cggbp1	VRKKQRPLTASLQCNSPAQTEKASVIQDFVK	QRPLTASLQCNS(1)PAQTEK	QRPLT(-106.1)AS(-95.5)LQCNS(75.65)PAQT(-75.65)EK	12	6.44702e-57	187.18	3	703.665	0.40838	+	-0.254925	-0.23381	-0.289611	3	-0.259449	0.0281742	0.0763631	-0.111901	-0.0852022	-0.164026	3	-0.120376	0.0400893	0.294162
7938	Q80U78;Q80U78-2;Q80U78-3;E9Q6M7;Q3TTW5;Q80U78-4;A8WHM8	19;19;19;19;19;19;19	S	Q80U78	S19	Pumilio homolog 1	Pum1	ACVLKRKAVLWQDSFSPHLKHHPQEPANPNM	AVLWQDSFS(1)PHLK	AVLWQDS(-37.66)FS(37.66)PHLK	9	4.95183e-05	117.13	3	536.592	1.0961	+	-0.297234	-0.177858	-0.28979	3	-0.25496	0.0668762	0.0881663	-0.121658	-0.0813198	-0.149219	3	-0.117399	0.0341495	0.294162
10303	Q9CX66	177	S	Q9CX66	S177	Uncharacterized protein C12orf45 homolog	D10Wsu102e	LPNAEGGKGKIEILDSPASKKKKQ_______	GKIEILDS(1)PASK	GKIEILDS(35.45)PAS(-35.45)K	8	0.000205724	109.04	3	446.562	0.34635	+	-0.231325	-0.217441	-0.278594	3	-0.242453	0.032059	0.0881663	-0.0890923	-0.11085	-0.142671	3	-0.114204	0.0269464	0.294162
6057	Q6PDG5;Q6PDG5-2;Q3UID0	321;321;321	S	Q6PDG5	S321	SWI/SNF complex subunit SMARCC2	Smarcc2	SPTPEAKKKNAKKGPSTPYTKSKRGHREEEQ	KGPS(0.91)T(0.09)PYTK	KGPS(10.02)T(-10.02)PY(-85.26)T(-51.89)K	4	0.000545927	117.14	2	529.75	-2.2078	+	-0.224178	-0.191505	-0.23203	3	-0.215905	0.0214919	0.10401	-0.065505	-0.131015	-0.199453	3	-0.131991	0.0669796	0.294162
13055	Q6PDG5;Q6PDG5-2;Q3UID0	322;322;322	T	Q6PDG5	T322	SWI/SNF complex subunit SMARCC2	Smarcc2	PTPEAKKKNAKKGPSTPYTKSKRGHREEEQE	KGPS(0.047)T(0.953)PYTK	KGPS(-13.07)T(13.07)PY(-65.73)T(-42.34)K	5	0.000664057	124.48	2	529.75	-1.1992	+	-0.274391	-0.192993	-0.171726	3	-0.213037	0.0541875	0.106136	-0.103975	-0.116191	-0.105101	3	-0.108422	0.00675142	0.294162
5701	Q3TC46	179	S	Q3TC46	S179	Protein PAT1 homolog 1	Patl1	DDRDLSERALPRRSTSPIIGSPPVRAVPIGT	RS(0.004)T(0.004)S(0.992)PIIGSPPVR	RS(-24.21)T(-24.21)S(24.21)PIIGS(-35.29)PPVR	4	0.000199085	111.11	3	482.92	0.76721	+	-0.171714	-0.1887	-0.201069	3	-0.187161	0.014738	0.131962	-0.0827136	-0.113047	-0.168321	3	-0.12136	0.0434048	0.294162
1060	O70237;B7ZNH2	140;140	S	O70237	S140	Zinc finger protein Gfi-1b	Gfi1b	TMQSAFLERSVRLYGSPLVPSTESPLDFRLR	LYGS(1)PLVPSTESPLDFR	LY(-72.87)GS(66.36)PLVPS(-66.36)T(-71.7)ES(-84.14)PLDFR	4	1.39257e-45	166.38	2	979.469	-0.14171	+	-0.20444	-0.195295	-0.149527	3	-0.183087	0.0294215	0.13322	-0.103393	-0.129204	-0.094541	3	-0.109046	0.0180097	0.294162
11244	Q9Z1N2	332	S	Q9Z1N2	S332	Origin recognition complex subunit 1	Orc1	NPAMTTTKLGVDNTLSPIRNGLRSSVVPSGG	LGVDNT(0.001)LS(0.999)PIRNGLR	LGVDNT(-32.46)LS(32.46)PIRNGLR	8	2.01372e-07	154.56	2	852.943	-0.52124	+	-0.183063	-0.162071	-0.215849	3	-0.186994	0.0271038	0.13543	-0.0743409	-0.138603	-0.137607	3	-0.11685	0.0368176	0.294162
10631	Q9DBR1;Q9DBR1-2	471;471	S	Q9DBR1	S471	5'-3' exoribonuclease 2	Xrn2	NPRQAAYEMRMQRNSSPSISPNTSFASDGSP	NS(0.21)S(0.789)PS(0.676)IS(0.323)PNT(0.001)S(0.001)FASDGSPSPLGGIKR	NS(-6.08)S(6.08)PS(3.42)IS(-3.42)PNT(-28.03)S(-27.39)FAS(-40.03)DGS(-70.57)PS(-81.45)PLGGIKR	3	7.30047e-217	216.53	3	907.404	-1.854	+	0.00659439	-0.142686	-0.208441	3	-0.114844	0.110188	0.459236	-0.651985	-0.134535	-0.0413137	3	-0.275945	0.328979	0.294162
10662	Q9DC04;Q9DC04-4;I7HFV2;Q9DC04-1	589;553;191;191	S	Q9DC04	S589	Regulator of G-protein signaling 3	Rgs3	PESSASVQKRLPSQESPSSLGSLPEKDLAEQ	RLPS(0.131)QES(0.858)PS(0.008)S(0.003)LGSLPEK	RLPS(-8.15)QES(8.15)PS(-20.56)S(-24.59)LGS(-37.69)LPEK	7	0.00096202	81.017	3	631.31	-1.9662	+		-0.0108529	-0.0933516	2	-0.0521023	0.0583354	0.596472		-0.0940585	-0.17866	2	-0.136359	0.0598226	0.294162
1984	E9PYZ7;Q6NZN0;E9PUF4;Q6NZN0-5;E9Q640;Q6NZN0-3;Q6NZN0-4;Q6NZN0-2	133;133;133;133;133;133;133;133	S	E9PYZ7	S133	RNA-binding protein 26	Rbm26	KKFSRRLNHSPPQSSSRYRDNRSRDERKKDD	LNHS(0.017)PPQS(0.082)S(0.039)S(0.862)R	LNHS(-17.1)PPQS(-10.21)S(-13.45)S(10.21)R	10	0.000278581	120.21	2	645.285	0.42357	+	-0.0332155		0.0790215	2	0.022903	0.0793635	0.912919	-0.0695941		-0.133443	2	-0.101519	0.0451481	0.294162
9282	Q8K2Z4;Q8K2Z4-2	1320;1320	S	Q8K2Z4	S1320	Condensin complex subunit 1	Ncapd2	SAKKPSAVSRLQPLTSVDSDNDFVTPKPRRT	LQPLT(0.002)S(0.998)VDSDNDFVTPK	LQPLT(-26.45)S(26.45)VDS(-61.23)DNDFVT(-167.98)PK	6	5.29448e-212	244.31	2	978.454	0.37733	+	0.795498	0.68182	0.479765	3	0.652361	0.159914	0.0143064	0.124187	0.119784	0.109182	3	0.117718	0.00771257	0.295167
11654	B2RT41	769	T	B2RT41	T769		Zfc3h1	PKVPPKSEKENDPLRTPEALPEEKKMEYRLL	ENDPLRT(1)PEALPEEK	ENDPLRT(80.74)PEALPEEK	7	5.04549e-05	124.81	3	606.615	1.7258	+	0.285962	0.258685	0.309379	3	0.284675	0.0253713	0.108717	0.109758	0.0944012	0.139219	3	0.114459	0.0227757	0.295167
5894	Q3U1Z5;G3UZQ1	38;38	S	Q3U1Z5	S38	G-protein-signaling modulator 3	Gpsm3	PPVNATARPWRSAPPSPPPPGTRHTALGPRS	SAPPS(1)PPPPGTR	S(-57.18)APPS(57.18)PPPPGT(-61.32)R	5	2.36517e-05	110.22	2	620.79	-2.123	+	0.259642		0.135554	2	0.197598	0.0877431	0.256008	0.169065		0.110043	2	0.139554	0.0417348	0.295458
6144	Q3USH5	283	S	Q3USH5	S283	Splicing factor, suppressor of white-apricot homolog	Sfswap	LAESKNEEKKKSGPTSDNEEEDDEEDGSYLH	S(0.055)GPT(0.055)S(0.89)DNEEEDDEEDGSYLHPSLFASKK	S(-12.08)GPT(-12.08)S(12.08)DNEEEDDEEDGS(-48.82)Y(-49.02)LHPS(-58.66)LFAS(-59.53)KK	5	3.53549e-45	133.99	4	791.578	-0.053413	+	-0.0162159	-0.31248	-0.166104	3	-0.164933	0.148136	0.310156	-0.111867	-0.393963	-0.0352696	3	-0.180367	0.188903	0.296629
225	Q62504;Q62504-3;A2ADB1;Q62504-2;A2ADB0	2450;2450;2426;2427;2449	S	Q62504	S2450	Msx2-interacting protein	Spen	PALMDDGPQARFKVHSIIESDPVTPPSDSGI	VHS(0.854)IIES(0.069)DPVT(0.063)PPS(0.007)DS(0.006)GIPPPT(0.001)IPLVTIAK	VHS(10.94)IIES(-10.94)DPVT(-11.29)PPS(-21.05)DS(-21.32)GIPPPT(-29.13)IPLVT(-39.17)IAK	3	0.0164467	42.347	4	790.166	-0.40342	+	0.199289	0.266467	0.228067	3	0.231274	0.0337037	0.157396	0.0622064	0.101266	0.21157	3	0.125014	0.077462	0.29702
14088	Q9CPY3;Q9CPY3-2	159;22	T	Q9CPY3	T159	Sororin	Cdca5	RSYSRLQSLGCASTSTPGRRSFFGFEGPDDL	LQS(0.015)LGCAS(0.005)T(0.005)S(0.005)T(0.971)PGRR	LQS(-18.16)LGCAS(-23.26)T(-23.26)S(-23.26)T(18.16)PGRR	11	4.00643e-18	164.97	2	835.888	-1.3946	+	-0.307197	-0.257031	-0.369902	3	-0.311377	0.0565512	0.0574554	-0.134209	-0.0677698	-0.179695	3	-0.127225	0.0562887	0.299506
5045	P53996;P53996-2;P53996-3;D3YYF6	49;42;49;49	S	P53996;P53996-2	S49	Cellular nucleic acid-binding protein	Cnbp	RGGFTSDRGFQFVSSSLPDICYRCGESGHLA;RGMRSRGRGFQFVSSSLPDICYRCGESGHLA	GFQFVSS(0.033)S(0.967)LPDICYR	GFQFVS(-55.6)S(-14.66)S(14.66)LPDICY(-170.81)R	8	2.06883e-155	221.81	2	928.408	-0.56858	+	0.205637	0.210586	0.278198	3	0.231474	0.0405397	0.15835	0.109506	0.103188	0.129075	3	0.113923	0.0134972	0.299865
1446	P42209;D3Z3V3	311;283	S	P42209	S311	Septin-1	2014-09-01	LARPGARDRASRSKLSRQSATEIPLPMLPLA	LS(0.965)RQS(0.018)AT(0.018)EIPLPMLPLADTEK	LS(17.36)RQS(-17.36)AT(-17.36)EIPLPMLPLADT(-93.26)EK	2	7.42907e-12	140.63	4	598.306	-1.0803	+	0.207796	0.195152	0.256349	3	0.219766	0.0323068	0.17391	0.0889543	0.158694	0.116072	3	0.12124	0.035156	0.299865
8690	Q8BZ47	1057	S	Q8BZ47	S1057	Zinc finger protein 609	Znf609	WKQKPSIPPTLTKAPSLTDLVKSGPGKAKEP	APS(0.999)LT(0.001)DLVK	APS(31.75)LT(-31.75)DLVK	3	0.000275926	127.17	2	512.26	-0.26954	+	0.186193	0.156246	0.209813	3	0.184084	0.0268458	0.233133	0.106077	0.0682972	0.180739	3	0.118371	0.0572202	0.299865
8531	Q8BTI8;Q8BTI8-3;Q8BTI8-2	1077;1077;981	S	Q8BTI8	S1077	Serine/arginine repetitive matrix protein 2	Srrm2	SLSRSSSPVTELTARSPVKQDKSEISTDPKL	GS(0.058)LS(0.425)RS(0.509)S(0.477)S(0.476)PVT(0.053)ELT(0.009)ARS(0.992)PVK	GS(-9.77)LS(-0.79)RS(0.79)S(0)S(0)PVT(-9.26)ELT(-19.77)ARS(19.77)PVK	17	6.37022e-06	156.08	3	767.009	-0.068379	+	0.220944	0.125871	0.170471	3	0.172429	0.0475667	0.277198	0.0672828	0.0864666	0.229494	3	0.127748	0.0886354	0.299865
11960	G5E8V9;E9Q3G5;E9QAY5;A2RSX9	135;128;14;103	T	G5E8V9	T135		Arfip1	PAMEKLELVRKWSLNTYKCTRQIISEKLGRG	KWS(0.009)LNT(0.991)YK	KWS(-20.34)LNT(20.34)Y(-56.96)K	6	0.00111009	128.03	2	560.265	-1.1965	+	0.163519	0.114244	0.195779	3	0.157847	0.0410623	0.301031	0.11589	0.0709609	0.163524	3	0.116792	0.0462881	0.299865
2632	E9Q983;E9Q3Z5;Q8K4L3;Q8K4L2	241;241;241;241	S	E9Q983	S241	Supervillin	Svil	RSPKQIPSSPLQQPASPNHPGDSPLPTEARA	QIPSSPLQQPAS(0.999)PNHPGDS(0.001)PLPTEAR	QIPS(-41.01)S(-41.01)PLQQPAS(32.01)PNHPGDS(-32.01)PLPT(-37.73)EAR	12	5.96417e-14	107.71	3	934.447	-0.77981	+	-0.331978	-0.251657	-0.300661	3	-0.294765	0.0404837	0.0598761	-0.124145	-0.107371	-0.0897992	3	-0.107105	0.0171747	0.299888
1314	D3YZC9;F6SRV1	463;65	S	D3YZC9	S463		Sf1	GKSVPGKYACGLWGLSPASRKRYDAAAAYGH	YACGLWGLS(1)PASR	Y(-112.65)ACGLWGLS(47.49)PAS(-47.49)R	9	1.32455e-53	183.75	2	759.334	0.50403	+	-0.210941	-0.178251	-0.172253	3	-0.187148	0.0208226	0.128986	-0.0964581	-0.0923683	-0.166282	3	-0.11837	0.0415439	0.299888
2156	Q80TP3;E9Q2H1	139;139	S	Q80TP3	S139	E3 ubiquitin-protein ligase UBR5	Ubr5	AGNTLGSRWSSGVGGSGGGSSGRSSAGARDS	WSSGVGGS(0.985)GGGS(0.011)S(0.004)GR	WS(-53)S(-38.56)GVGGS(19.63)GGGS(-19.63)S(-24.28)GR	8	0.000329965	109.28	2	687.775	-0.42551	+	-0.193088	-0.104721	-0.041669	3	-0.113159	0.0760613	0.313657	-0.131105	-0.115766	-0.0757294	3	-0.107533	0.028591	0.299888
5440	P97302	419	S	P97302	S419	Transcription regulator protein BACH1	Bach1	WSDICSTDSPCQMQLSPTVAKDGPEQGYSQR	GFWSDICSTDS(0.001)PCQMQLS(0.881)PT(0.117)VAK	GFWS(-54.79)DICS(-44.53)T(-36.95)DS(-28.27)PCQMQLS(8.77)PT(-8.77)VAK	18	0.00204719	62.847	3	899.046	-1.4693	+	0.380284	0.0475864		2	0.213935	0.235252	0.340124	0.138998	0.0672197		2	0.103109	0.0507546	0.299946
1818	E9PVX6	767	S	E9PVX6	S767		Mki67	STRNAAKQQSDRYSASPTLRRRSIKHENTVQ	YSAS(0.995)PT(0.005)LR	Y(-62.74)S(-38.1)AS(23.17)PT(-23.17)LR	4	9.41908e-14	166.9	2	487.721	-0.10113	+	-0.21104	-0.170857	-0.224455	3	-0.202118	0.0278909	0.117663	-0.106157	-0.0780847	-0.191143	3	-0.125128	0.0588686	0.299986
11850	E9PVX6	501	T	E9PVX6	T501		Mki67	PLKRGETPTKRKSLGTHSPAVLKTIIKERPQ	S(0.031)LGT(0.912)HS(0.058)PAVLK	S(-14.74)LGT(12)HS(-12)PAVLK	4	0.00717022	78.705	3	397.204	0.30674	+		-0.179864	-0.18721	2	-0.183537	0.00519451	0.137551		-0.129994	-0.0974656	2	-0.11373	0.0230013	0.299986
12344	G3X963;Q8CDM1	1131;807	T	G3X963	T1131	ATPase family AAA domain-containing protein 2	Atad2	QNEKLKVPCTPVACSTPAQLKRKFHKKSKWH	LKVPCTPVACS(0.043)T(0.957)PAQLK	LKVPCT(-108.45)PVACS(-13.43)T(13.43)PAQLK	12	3.17939e-11	153.23	3	650.658	-2.0531	+	-0.173776	-0.168405	-0.175744	3	-0.172642	0.00379842	0.149822	-0.0974656	-0.106838	-0.121954	3	-0.108752	0.0123558	0.299986
2571	E9Q8L9	881	S	E9Q8L9	S881		Rab11fip1	IADLSLSLPSIPEVASDDERVDEVGDGGKAE	SPIIADLSLSLPS(0.004)IPEVAS(0.996)DDERVDEVGDGGKAEK	S(-79.7)PIIADLS(-61.51)LS(-48.69)LPS(-23.75)IPEVAS(23.75)DDERVDEVGDGGKAEK	19	1.30098e-15	110.07	4	922.951	0.69306	+	-0.0938967	-0.226243	-0.101541	3	-0.14056	0.0743017	0.22044	-0.078203	-0.226126	-0.0710347	3	-0.125121	0.087546	0.299986
14296	Q9JJY4	40	T	Q9JJY4	T40	Probable ATP-dependent RNA helicase DDX20	Ddx20	AAPVQAVEPTPASPWTQRTAHDIGGPRTRTG	AAAPVQAVEPT(0.001)PAS(0.142)PWT(0.857)QR	AAAPVQAVEPT(-28.71)PAS(-7.8)PWT(7.8)QR	17	1.76299e-15	142.22	2	1029	-0.042716	+		-0.122277	-0.0131744	2	-0.0677259	0.0771475	0.516943		-0.0905242	-0.177046	2	-0.133785	0.0611799	0.299986
3272	F8VQC9;Q8BTY2-2	263;263	S	F8VQC9	S263	Sodium bicarbonate cotransporter 3	Slc4a7	DPHLLERNGILASPQSAPGNLDNSKSGEMKG	NGILASPQS(1)APGNLDNSK	NGILAS(-80.46)PQS(80.46)APGNLDNS(-84.91)K	9	3.14308e-104	198.54	2	931.936	-0.0058569	+	-0.0964814	-0.103937	0.0356225	3	-0.0549319	0.078511	0.603409	-0.303671	-0.100322	-0.0580842	3	-0.154026	0.131306	0.299986
5689	Q3B7Z2	191	S	Q3B7Z2	S191	Oxysterol-binding protein 1	Osbp	LAKAKAVKMLAESDDSGDEESVSQTDKTELQ	MLAES(1)DDS(1)GDEESVSQTDKTELQSTLR	MLAES(43.6)DDS(35.6)GDEES(-35.6)VS(-40.34)QT(-44.68)DKT(-55.31)ELQS(-62.13)T(-62.24)LR	8	0.00156211	83.31	3	1044.43	-0.96876	+	0.0622811	-0.0835671		2	-0.010643	0.10313	0.902992	-0.0744507	-0.208337		2	-0.141394	0.0946722	0.299986
13898	Q8R2M2	495	T	Q8R2M2	T495	Deoxynucleotidyltransferase terminal-interacting protein 2	Dnttip2	LEDAACDSALFVIDKTPGLSADKNFYLEDKA	EASAEDLEDAACDSALFVIDKT(1)PGLSADK	EAS(-153.9)AEDLEDAACDS(-89.32)ALFVIDKT(35.34)PGLS(-35.34)ADK	22	3.28308e-71	168.86	4	780.351	0.58991	+	-0.29813	-0.341559	-0.233859	3	-0.291183	0.0541853	0.059279	-0.0523476	-0.169951	-0.168674	3	-0.130324	0.0675327	0.300213
12379	Q60875;Q60875-5;H3BJU7;Q60875-4;H3BJX8;H3BJ45;H3BJ40;H3BKH9	795;766;766;768;778;778;780;793	T	Q60875	T795	Rho guanine nucleotide exchange factor 2	Arhgef2	NSRDGEAGRAAVASVTPEKQATELALLQRQH	AAVAS(0.002)VT(0.998)PEK	AAVAS(-26.14)VT(26.14)PEK	7	0.000577986	131.79	2	526.755	-0.29092	+	-0.272231	-0.289967	-0.300269	3	-0.287489	0.0141824	0.0606483	-0.0729847	-0.143688	-0.120146	3	-0.112273	0.0360032	0.300213
7601	Q6PR54;Q6PR54-3;Q6PR54-2	2144;2151;2144	S	Q6PR54	S2144	Telomere-associated protein RIF1	Rif1	SILKRGLKRSQEDEISPVNKIRRVSFADPIY	SQEDEIS(1)PVNK	S(-150.61)QEDEIS(150.61)PVNK	7	4.15487e-158	233.28	2	663.285	0.93157	+	-0.171256	-0.192776	-0.205908	3	-0.18998	0.0174941	0.128986	-0.0706658	-0.125657	-0.160138	3	-0.11882	0.0451264	0.300213
10635	Q9DBR1;Q9DBR1-2	485;485	S	Q9DBR1	S485	5'-3' exoribonuclease 2	Xrn2	SSPSISPNTSFASDGSPSPLGGIKRKAEDSD	NSSPSISPNTSFAS(0.003)DGS(0.996)PS(0.001)PLGGIK	NS(-86.85)S(-82.21)PS(-72.25)IS(-47)PNT(-42.96)S(-36.78)FAS(-25.14)DGS(25.14)PS(-29.64)PLGGIK	17	4.95766e-34	143.17	3	828.715	1.7485	+	-0.133754	-0.142077	-0.210746	3	-0.162192	0.0422544	0.168834	-0.124341	-0.123799	-0.0708871	3	-0.106343	0.0307065	0.300213
3753	Q4KWH5;Q4KWH5-2;I1E4X4;H3BKK4;I1E4X6	1484;1442;1445;1475;1483	S	Q4KWH5	S1484	1-phosphatidylinositol 4,5-bisphosphate phosphodiesterase eta-1	Plch1	APLAALKLPSPCKSKSLGDLTSEDIACNFES	S(0.166)KS(0.827)LGDLT(0.007)SEDIACNFESK	S(-6.98)KS(6.98)LGDLT(-20.54)S(-41.72)EDIACNFES(-98.52)K	3	1.53453e-05	103.99	3	727.652	1.6147	+		-0.0811208	0.0116551	2	-0.0347328	0.0656025	0.671832		-0.160233	-0.0753279	2	-0.11778	0.0600369	0.300213
638	A2RSJ4	952	S	A2RSJ4	S952	UHRF1-binding protein 1-like	Uhrf1bp1l	LSHAPLKDPLLFKSASDTNLQKGTSFLDYLS	S(0.001)AS(0.998)DT(0.001)NLQK	S(-30)AS(30)DT(-32.08)NLQK	3	0.000263319	134.18	2	522.224	0.047442	+	-0.335885	-0.436875	-0.156095	3	-0.309618	0.142221	0.0607115	-0.121396	-0.347183	-0.0301948	3	-0.166258	0.163187	0.300709
6933	Q61937;Q9DAY9;Q5SQB0;Q5SQB5;E9Q5T3	139;139;139;139;127	S	Q61937	S139	Nucleophosmin	Npm1;Gm5611	ESEDEDEEDVKLLGMSGKRSAPGGGNKVPQK	LLGMS(1)GKR	LLGMS(65.69)GKR	5	0.00396571	130.75	2	471.236	-1.897	+	-0.423072	-0.409928	-0.432777	3	-0.421925	0.0114677	0.0346311	-0.167406	-0.225673	-0.0269008	3	-0.139993	0.102182	0.300944
14538	P29351;P29351-3;P29351-2;G3UYY5	536;497;538;36	Y	P29351	Y536	Tyrosine-protein phosphatase non-receptor type 6	Ptpn6	KKLEIIQSQKGQESEYGNITYPPAVRSAHAK	GQES(0.018)EY(0.982)GNITYPPAVR	GQES(-17.41)EY(17.41)GNIT(-37.1)Y(-44.03)PPAVR	6	0.00172784	103.67	2	930.912	-1.0461	+	0.015234		-0.0811672	2	-0.0329666	0.0681659	0.736862	0.0747137	0.195041	0.118992	3	0.129582	0.0608588	0.301092
2661	P54103;E9Q9H3;Q3TRX6	49;49;49	S	P54103	S49	DnaJ homolog subfamily C member 2	Dnajc2	WFEAFVKRRNRNASTSFQELEDKKELSEESE	NAS(0.023)T(0.135)S(0.842)FQELEDKK	NAS(-15.68)T(-7.96)S(7.96)FQELEDKK	5	4.79411e-05	110.32	3	526.235	-0.68853	+	-0.655235		-0.615097	2	-0.635166	0.0283812	0.00384525	-0.23325		-0.0365491	2	-0.1349	0.139089	0.301706
6440	Q5FWK3;A2AH25	51;91	S	Q5FWK3	S51	Rho GTPase-activating protein 1	Arhgap1	DEMPDFPKSDDSKSSSPEPVTHLKWDDPYYD	SS(0.018)S(0.981)PEPVTHLK	S(-34.32)S(-17.29)S(17.29)PEPVT(-94.82)HLK	3	6.12991e-113	213.99	2	631.295	-0.40008	+	0.0779127	0.0592604	0.0947494	3	0.0773075	0.0177522	0.646037	0.0912363	0.0491792	0.310389	3	0.150268	0.140254	0.301707
6231	Q9Z1S8;Q3ZB57	211;211	S	Q9Z1S8	S211	GRB2-associated-binding protein 2	Gab2	LHQCISRRTENARSASFSQGTRQKSDTAVQK	S(0.002)AS(0.994)FS(0.005)QGTR	S(-28.02)AS(23.11)FS(-23.11)QGT(-70.47)R	3	0.00383132	89.44	2	510.711	-0.80362	+	0.223418	0.270003	0.182732	3	0.225384	0.0436686	0.173993	0.129327	0.125546	0.100376	3	0.118417	0.0157371	0.302617
5618	Q0P5V2	597	S	Q0P5V2	S597	Sine oculis-binding protein homolog	Sobp	LSPRDSKQGSSKSADSPPGSSGQALSLAPAE	SADS(1)PPGSSGQALSLAPAER	S(-41.69)ADS(41.69)PPGS(-53.56)S(-50.55)GQALS(-81.57)LAPAER	4	1.56367e-65	172.17	2	989.449	-1.3711	+	0.186052	0.0656171		2	0.125834	0.0851602	0.410499	0.118273	0.078964		2	0.0986186	0.0277957	0.302617
11101	Q9R123	282	S	Q9R123	S282	N-acetyltransferase 6	Nat6	PPLPPPPPLPQSLTASPPPSPEPLPQSPLET	GPPLPPPPPLPQSLT(0.002)AS(0.993)PPPS(0.025)PEPLPQS(0.858)PLET(0.064)CY(0.058)RDLK	GPPLPPPPPLPQS(-37.21)LT(-27.26)AS(23.48)PPPS(-16.24)PEPLPQS(11.29)PLET(-11.29)CY(-11.75)RDLK	17	2.62026e-07	71.425	4	1057.77	1.2656	+	-0.145457	-0.166146	-0.268999	3	-0.193534	0.0661682	0.140171	-0.130977	-0.109188	-0.076422	3	-0.105529	0.0274608	0.302707
7175	Q69ZL1	494	S	Q69ZL1	S494	FYVE, RhoGEF and PH domain-containing protein 6	Fgd6	QRHSLPAAGVLKKAASEELVEKSSSGKETNV	KAAS(1)EELVEK	KAAS(90.86)EELVEK	4	0.00104392	90.861	3	395.192	1.1986	+	-0.107293	-0.257055	-0.109444	3	-0.157931	0.085851	0.187055	-0.0724705	-0.160522	-0.103975	3	-0.112322	0.0446153	0.302707
8899	Q8C708	195	S	Q8C708	S195	Transmembrane protein C16orf54 homolog		GLQVGSPRPWRPRQGSLEPDWGLQPRVTLEQ	QGS(1)LEPDWGLQPR	QGS(103.87)LEPDWGLQPR	3	8.41238e-33	171.25	2	781.854	0.45113	+	0.0933166	0.108328	0.221813	3	0.141152	0.0702558	0.357879	0.167785	0.0553401	0.151521	3	0.124882	0.0607717	0.302912
558	A2AWL7;E9QLG3;H7BX50;A2AWL7-3;A2AWL7-2	1450;1450;1449;1371;1449	S	A2AWL7	S1450	MAX gene-associated protein	Mga	ERLHGGKGLPFYAGLSPSGKLVAYKRKPSST	GLPFYAGLS(1)PSGK	GLPFY(-134.99)AGLS(48.52)PS(-48.52)GK	9	1.24797e-24	164.63	3	458.555	-0.5509	+	-0.220115	-0.216962	-0.249321	3	-0.228799	0.017842	0.0945548	-0.0791812	-0.16139	-0.0926154	3	-0.111062	0.0440998	0.302921
360	A2AIX1;E9QAT4	1030;1030	S	A2AIX1	S1030		Sec16a	TLNRTLENPVRMYSPSPSDGPASQQPLPNHP	T(0.007)LENPVRMY(0.028)S(0.035)PS(0.888)PS(0.043)DGPASQQPLPNHPR	T(-21.19)LENPVRMY(-15.05)S(-14.08)PS(13.19)PS(-13.19)DGPAS(-37.7)QQPLPNHPR	12	5.7099e-13	125.31	3	1051.49	-1.3173	+	-0.0407678	-0.13476	-0.0900816	3	-0.0885364	0.0470151	0.389334	-0.0848264	-0.128019	-0.108836	3	-0.107227	0.021641	0.302921
2561	E9Q8K8;Q6ZPZ3;Q6ZPZ3-2	1227;1276;1193	S	E9Q8K8	S1227	Zinc finger CCCH domain-containing protein 4	Zc3h4	KPAPKTGTGSPFAGNSPAREGEQDAGSLKDV	TGTGSPFAGNS(0.999)PAREGEQDAGSLK	T(-38.58)GT(-38.58)GS(-33.27)PFAGNS(33.27)PAREGEQDAGS(-35.27)LK	11	1.57657e-21	148.61	2	1207.53	-0.65913	+	0.352896	0.404475	0.312962	3	0.356777	0.0458797	0.0677251	0.0888157	0.173623	0.109601	3	0.124013	0.0442025	0.303718
10452	Q9D2Q3	423	S	Q9D2Q3	S423	Uncharacterized protein C10orf88 homolog		DAKMALLVDLLRGPNSPPPGMPLRHYDSRER	MALLVDLLRGPNS(1)PPPGMPLR	MALLVDLLRGPNS(71.9)PPPGMPLR	13	8.23336e-05	96.805	3	775.405	-1.3998	+	0.320126	0.244104	0.420342	3	0.328191	0.0883955	0.0831946	0.108926	0.0661022	0.176213	3	0.11708	0.0555064	0.303718
7408	Q6P5D4	1122	S	Q6P5D4	S1122	Centrosomal protein of 135 kDa	Cep135	RERAIQEMRRLGLPTSPLSSTLKSPVQTPDH	LGLPT(0.001)S(0.999)PLSSTLK	LGLPT(-31.01)S(31.01)PLS(-34.47)S(-54)T(-51.08)LK	6	2.60166e-13	146.27	2	697.371	0.71806	+	0.359551	0.276646	0.339059	3	0.325085	0.043183	0.0811499	0.140088	0.096632	0.111029	3	0.115916	0.0221361	0.303907
8500	Q8BT07;Q8BT07-2	428;427	S	Q8BT07	S428	Centrosomal protein of 55 kDa	Cep55	REPESRVKATSPKSPSAALNDSLVECPKCSV	AT(0.012)S(0.012)PKS(0.055)PS(0.92)AALNDS(0.001)LVECPK	AT(-18.88)S(-18.88)PKS(-12.22)PS(12.22)AALNDS(-29.37)LVECPK	8	1.42185e-09	137.58	4	538.755	-0.36629	+	0.185145	0.368157	0.484404	3	0.345902	0.150866	0.0820446	0.103705	0.115544	0.121823	3	0.113691	0.00919992	0.304311
11992	E9Q5C9	610	T	E9Q5C9	T610		Nolc1	ADEATTPQAKKVKLETPNTFPKRKKGERRAS	VKLET(1)PNT(1)FPK	VKLET(68.75)PNT(68.75)FPK	5	0.00240866	126.07	3	478.554	2.001	+	-0.183248	-0.181781	-0.179322	3	-0.18145	0.00198399	0.138128	-0.0918076	-0.139704	-0.0846835	3	-0.105398	0.0299223	0.304478
13052	Q3UHU8;Q9ESZ8;G3UYD0;Q9ESZ8-5;Q9ESZ8-4;Q9ESZ8-3;Q9ESZ8-6;Q9ESZ8-2	518;558;473;499;518;520;537;539	T	Q3UHU8	T518	General transcription factor II-I	Gtf2i	LLTHSTTEVTQPRTNTPVKEDWNVRITKLRK	T(0.136)NT(0.864)PVKEDWNVR	T(-8.02)NT(8.02)PVKEDWNVR	3	0.0173836	79.565	3	513.571	0.35743	+	-0.320863	-0.263253	-0.292633	3	-0.29225	0.0288069	0.0601295	-0.1344	-0.0718244	-0.138492	3	-0.114906	0.0373655	0.30466
1898	Q8K4B0;F8WHY8;E9PX23	576;559;576	S	Q8K4B0	S576	Metastasis-associated protein MTA1	Mta1	SSLTPAKSAPVINNGSPTILGKRSYEQHNGV	SAPVINNGS(1)PTILGK	S(-124.6)APVINNGS(41.17)PT(-41.17)ILGK	9	1.1861e-178	229.37	2	774.395	0.21328	+	-0.258817	-0.258911	-0.285085	3	-0.267604	0.0151384	0.0702125	-0.146748	-0.14112	-0.0510367	3	-0.112968	0.0537081	0.30466
10251	Q9CRC8;F6RDA7;D6RHB1;F6RGS7	71;70;71;27	S	Q9CRC8	S71	Leucine-rich repeat-containing protein 40	Lrrc40	WRINVDIPEEANQNLSFSSTERWWDQTDLTK	INVDIPEEANQNLS(0.985)FS(0.007)S(0.007)T(0.002)ERWWDQTDLTK	INVDIPEEANQNLS(21.8)FS(-21.8)S(-21.8)T(-27.28)ERWWDQT(-65.82)DLT(-65.82)K	14	2.49521e-07	90.762	3	1172.87	2.7745	+	-0.151435		-0.0950647	2	-0.12325	0.03986	0.204793	-0.136721		-0.0514227	2	-0.0940716	0.0603147	0.30466
4523	P16951-2;P16951;A2AQE9;G3UXC3;A2AQF0;P16951-3	118;118;118;118;118;78	S	P16951-2	S118	Cyclic AMP-dependent transcription factor ATF-2	Atf2	SKIEEPSVVETTHQDSPLPHPESTTSDEKLV	SKIEEPS(0.005)VVET(0.01)T(0.034)HQDS(0.948)PLPHPES(0.001)T(0.001)T(0.001)S(0.001)DEK	S(-33.61)KIEEPS(-23.07)VVET(-19.92)T(-14.45)HQDS(14.45)PLPHPES(-30.74)T(-30.74)T(-30.74)S(-30.74)DEK	16	0.00497621	57.339	5	657.703	0.73058	+	-0.103039		0.180818	2	0.0388898	0.200717	0.906589	-0.247605		-0.0337855	2	-0.140695	0.151193	0.30466
13873	Q8R010;Q8R3V2	82;42	T	Q8R010	T82	Aminoacyl tRNA synthase complex-interacting multifunctional protein 2	Aimp2	YELKAAVDGLSKMIHTPDADLDVTNILQADE	MIHT(1)PDADLDVTNILQADEPTTLATNTLDLNSVLGK	MIHT(57.28)PDADLDVT(-57.28)NILQADEPT(-108.11)T(-111.74)LAT(-127.4)NT(-129.5)LDLNS(-139.64)VLGK	4	9.05118e-114	142.72	3	1310.64	0.26325	+	0.186448	0.073755	0.422083	3	0.227429	0.177743	0.236985	0.0479296	0.0894812	0.363312	3	0.166907	0.171355	0.304714
11602	Q99JF8;A2BI12;Q99JF8-2	141;141;141	T	Q99JF8	T141	PC4 and SFRS1-interacting protein	Psip1	EKASNEDVTKAVDITTPKAARRGRKRKAEKQ	AVDIT(0.002)T(0.998)PK	AVDIT(-26.3)T(26.3)PK	6	0.00641071	110.54	2	462.726	-0.2027	+	-0.15896	-0.147374	-0.186335	3	-0.164223	0.0200066	0.162452	-0.0842902	-0.109534	-0.135737	3	-0.109854	0.0257247	0.305152
13268	Q62383	1532	T	Q62383	T1532	Transcription elongation factor SPT6	Supt6h	DPVPGITPSSSNRTRTPASINATPANINLAD	T(0.042)RT(0.958)PAS(0.999)INAT(0.001)PANINLADLTR	T(-13.59)RT(13.59)PAS(29.31)INAT(-29.31)PANINLADLT(-53)R	3	4.02115e-12	133.35	2	1185.56	1.936	+		-0.209567	-0.0359098	2	-0.122738	0.122794	0.329297		-0.146728	-0.0794345	2	-0.113081	0.0475835	0.305152
10307	Q9CXF4	203	S	Q9CXF4	S203	TBC1 domain family member 15	Tbc1d15	QDSRTLLVNCQNKSLSQSFENLLDEPAYGLI	S(0.908)LS(0.909)QS(0.183)FENLLDEPAYGLIQK	S(9.47)LS(9.53)QS(-9.47)FENLLDEPAY(-69.74)GLIQK	3	0	258.02	3	804.697	0.39471	+	-0.469352	-0.268033	-0.186448	3	-0.307944	0.145614	0.06443	-0.210746	-0.186552	-0.0254288	3	-0.140909	0.100738	0.305374
557	A2AWL7;E9QLG3;H7BX50;A2AWL7-3	2849;2888;2679;2770	S	A2AWL7	S2849	MAX gene-associated protein	Mga	ESISPLLLHLEDDDFSENEKQLGDTASEPDV	ELPDVQEESESISPLLLHLEDDDFS(1)ENEK	ELPDVQEES(-49.17)ES(-44.68)IS(-43.9)PLLLHLEDDDFS(43.9)ENEK	25	2.11868e-24	82.486	3	1146.18	3.5768	+	-0.204071	-0.432151	0.0400718	3	-0.198717	0.236157	0.363311	-0.10377	-0.350675	-0.0361896	3	-0.163545	0.165545	0.305374
1040	B7ZCR6;Q6PHP4	606;616	S	B7ZCR6	S606		Znf512b	HQRRCGKPPCEVDSPSFPCTHCGKTYRSKAG	CGKPPCEVDS(0.045)PS(0.955)FPCT(0.001)HCGK	CGKPPCEVDS(-13.31)PS(13.31)FPCT(-31.26)HCGK	12	0.000846393	71.872	4	600.737	-0.53436	+	-0.167504	0.050109		2	-0.0586974	0.153876	0.774729	-0.140634	-0.0976163		2	-0.119125	0.0304179	0.305374
2941	Q6A026;E9QPI5	1205;1205	S	Q6A026	S1205	Sister chromatid cohesion protein PDS5 homolog A	Pds5a	ETGVSENEENPVRIISVTPVKNIDTVKNKEI	IIS(0.944)VT(0.056)PVK	IIS(12.23)VT(-12.23)PVK	3	1.73175e-06	123.11	2	468.762	1.36	+	-0.236699	-0.0437211	-0.274573	3	-0.184998	0.123806	0.205527	-0.0589951	-0.163923	-0.130848	3	-0.117922	0.0536449	0.305886
12456	O08553	509	T	O08553	T509	Dihydropyrimidinase-related protein 2	Dpysl2	VPRGLYDGPVCEVSVTPKTVTPASSAKTSPA	GLYDGPVCEVSVT(1)PK	GLY(-173.17)DGPVCEVS(-59.61)VT(59.61)PK	13	1.2369e-96	197.6	2	850.884	0.14751	+	-0.401352	-0.361341	-0.363161	3	-0.375284	0.0225933	0.0458814	-0.0968753	-0.11204	-0.100508	3	-0.103141	0.00791759	0.306104
1801	E9PVX6	653	S	E9PVX6	S653		Mki67	PTSNLHNQFTTGHANSPCTIVVGRAQIEKVS	KPTSNLHNQFT(0.006)T(0.006)GHANS(0.925)PCT(0.064)IVVGR	KPT(-41.17)S(-41.17)NLHNQFT(-22.25)T(-22.25)GHANS(11.61)PCT(-11.61)IVVGR	17	0.0012235	58.373	4	704.838	0.13677	+	-0.432409	-0.226982	-0.417588	3	-0.358993	0.114565	0.0537856	-0.196397	-0.175913	-0.0282865	3	-0.133532	0.0917192	0.306104
13416	Q6PR54;Q6PR54-3;Q6PR54-2	1044;1051;1044	T	Q6PR54	T1044	Telomere-associated protein RIF1	Rif1	SPKIKSGKLLEEEKSTDFVFIPPEGKETKAR	LLEEEKS(0.181)T(0.819)DFVFIPPEGK	LLEEEKS(-6.57)T(6.57)DFVFIPPEGK	8	4.29234e-08	140.95	3	720.017	0.77069	+	-0.352441	-0.172224	-0.433738	3	-0.319468	0.133839	0.0691452	-0.11952	-0.0829096	-0.116176	3	-0.106202	0.0202408	0.306104
9369	Q8K4K6	165	S	Q8K4K6	S165	Pantothenate kinase 1	Pank1	LPSELQPQPLFAQHDSPAKKCRLRRRMDSGR	FQLPSELQPQPLFAQHDS(1)PAK	FQLPS(-118.78)ELQPQPLFAQHDS(118.78)PAK	18	1.35469e-54	158.83	3	820.065	0.25079	+	-0.228045	-0.203988	-0.255682	3	-0.229239	0.0258679	0.0950901	-0.13043	-0.0855088	-0.102194	3	-0.106044	0.022707	0.306104
13349	Q6NS46	37	T	Q6NS46	T37	Protein RRP5 homolog	Pdcd11	SSQQVVEQDNLFDVSTEEGPIKRKKSQKGPA	SSQQVVEQDNLFDVS(0.082)T(0.918)EEGPIK	S(-72.85)S(-72.85)QQVVEQDNLFDVS(-10.51)T(10.51)EEGPIK	16	2.74478e-18	129.47	3	843.718	0.11365	+	-0.219675	-0.176898	-0.139092	3	-0.178555	0.0403175	0.140608	-0.0658784	-0.127925	-0.159176	3	-0.11766	0.0474884	0.306104
2655	Q9JK45;G3UYG5;E9Q9F1	458;449;477	S	Q9JK45	S458	Potassium voltage-gated channel subfamily KQT member 5	Kcnq5	VGDRRSPSTDITAEGSPTKVQKSWSFNDRTR	RSPSTDITAEGS(0.999)PT(0.001)K	RS(-98.19)PS(-98.19)T(-95.66)DIT(-63.99)AEGS(31)PT(-31)K	12	2.30822e-05	116.98	3	542.917	1.5699	+	0.168497		-1.10147	2	-0.466487	0.898004	0.845246	-1.04285		-0.0277165	2	-0.535284	0.717809	0.306104
4077	O35295	316	S	O35295	S316	Transcriptional activator protein Pur-beta	Purb	KLYERRGGGSGGGDESEGEEVDED_______	RGGGSGGGDES(1)EGEEVDED	RGGGS(-51.39)GGGDES(51.39)EGEEVDED	11	1.317e-05	120.66	2	959.335	0.0050906	+		-0.707788	0.335894	2	-0.185947	0.737995	0.869712		-0.708853	-0.0296678	2	-0.369261	0.480257	0.306104
5428	P83741;P83741-3;P83741-4;P83741-2;P83741-5	2367;2625;2118;2616;2185	S	P83741	S2367	Serine/threonine-protein kinase WNK1	Wnk1	ASLQNFNISNLQKSISNPPGSNLRTT_____	SIS(1)NPPGSNLRTT	S(-49.7)IS(48.23)NPPGS(-48.23)NLRT(-50.29)T(-50.29)	3	0.0002317	108.97	2	712.332	0.99995	+	-0.376296	-0.377361	-0.248194	3	-0.33395	0.0742691	0.0506871	-0.172749	-0.113442	-0.055875	3	-0.114022	0.0584391	0.306123
1720	Q61026;E9PV80	699;699	S	Q61026	S699	Nuclear receptor coactivator 2	Ncoa2	KEKHKILHRLLQDSSSPVDLAKLTAEATGKE	LLQDS(0.002)S(0.128)S(0.871)PVDLAK	LLQDS(-27.36)S(-8.34)S(8.34)PVDLAK	7	1.49752e-08	135.09	2	726.853	0.43182	+	-0.274031	-0.270916	-0.213039	3	-0.252662	0.0343498	0.0770544	-0.083825	-0.117117	-0.114578	3	-0.105173	0.0185316	0.306123
1814	E9PVX6	1366	S	E9PVX6	S1366		Mki67	MSLESSQAEPVKTPASTKRLSKTDLSKVDVR	MSLESSQAEPVKT(0.152)PAS(0.892)T(0.956)K	MS(-69.01)LES(-66.21)S(-66.38)QAEPVKT(-8.96)PAS(8.96)T(12.86)K	16	0.00481728	80.453	4	513.476	-0.11342	+	-0.231502	-0.280039	-0.188872	3	-0.233471	0.0456154	0.0908695	-0.0452056	-0.183368	-0.171258	3	-0.133277	0.0765122	0.306123
12035	E9Q7G0;F6ZQA3	2037;684	T	E9Q7G0	T2037		Numa1	KQADRRQSMAFSILNTPKKLGNSLLRRGASK	QSMAFSILNT(1)PK	QS(-98.1)MAFS(-71.32)ILNT(71.32)PK	10	5.31892e-23	163.56	2	708.833	-1.4171	+	-0.224368	-0.193834	-0.270493	3	-0.229565	0.0385928	0.0993727	-0.108497	-0.0809271	-0.138334	3	-0.109253	0.028711	0.306123
5627	Q0VBL3	126	S	Q0VBL3	S126		Rbm15	YETGGGSSSSRLHSYSSPSTKNSSGGGESRS	LHS(0.001)YS(0.992)S(0.007)PSTK	LHS(-28.56)Y(-97.92)S(21.48)S(-21.48)PS(-56.8)T(-74.5)K	5	1.93103e-77	200.93	2	593.761	1.0461	+	-0.240861	-0.162292	-0.212161	3	-0.205105	0.0397572	0.114907	-0.125514	-0.0867479	-0.100267	3	-0.104176	0.0196764	0.306123
13539	Q80Y32	117	T	Q80Y32	T117		Hmgxb4	SPQSPDTAMDLLKAITSPLAAGAKSSKKAGE	AIT(0.982)S(0.018)PLAAGAK	AIT(17.41)S(-17.41)PLAAGAK	3	2.1875e-05	141.13	2	540.278	-0.45742	+	-0.179063	-0.14239	-0.160679	3	-0.160711	0.0183366	0.165274	-0.11059	-0.0790006	-0.142702	3	-0.110764	0.0318512	0.306123
5874	Q3U1F9	295	S	Q3U1F9	S295	Phosphoprotein associated with glycosphingolipid-enriched microdomains 1	Pag1	AAEGTGGHSKRFSSLSYKSREEDPTLTEEEI	RFSSLS(0.999)Y(0.001)K	RFS(-50.31)S(-41.4)LS(31.48)Y(-31.48)K	6	0.013689	84.198	3	356.502	1.2854	+	-0.0208205	0.0648322	-0.106089	3	-0.0206924	0.0854606	0.814966	-0.222482	-0.0937296	-0.0626572	3	-0.12629	0.0847416	0.306123
13719	Q8C6B9	31	T	Q8C6B9	T31	Active regulator of SIRT1	Rps19bp1	SEAPRAVPGQVQASGTPAKRTRRARAKASQA	AVPGQVQASGT(1)PAK	AVPGQVQAS(-34.07)GT(34.07)PAK	11	4.421e-95	204.23	2	695.84	1.0105	+	-0.322274	-0.302431	-0.301334	3	-0.30868	0.0117862	0.0547782	-0.0923346	-0.12803	-0.0877104	3	-0.102692	0.0220653	0.306131
13129	Q58FA4	44	T	Q58FA4	T44	Transcription factor E2F8	E2f8	NMVLAEIQPDLGPLTTPTKPKEVSQGEPWTP	ANMVLAEIQPDLGPLT(0.24)T(0.76)PT(0.001)KPK	ANMVLAEIQPDLGPLT(-5.01)T(5.01)PT(-30.85)KPK	17	1.17592e-22	140.13	3	805.418	-2.0892	+	-0.0430972	-0.161724		2	-0.102411	0.0838819	0.4145	-0.0614525	-0.260222		2	-0.160837	0.140551	0.30614
1754	Q6NZJ6;E9PVC6;E9Q9E1;E9PVC5;Q6NZJ6-2	1096;1049;1089;1090;1082	S	Q6NZJ6	S1096	Eukaryotic translation initiation factor 4 gamma 1	Eif4g1	SIDSNNQLFAPGGRLSWGKGSSGGSGAKPSD	ITKPGSIDSNNQLFAPGGRLS(1)WGK	IT(-86.56)KPGS(-84.19)IDS(-79)NNQLFAPGGRLS(79)WGK	21	1.42854e-07	123.61	4	656.581	1.534	+	-0.0339381	0.0624316	0.0263735	3	0.018289	0.0486908	0.936624	0.102989	0.0971184	0.136184	3	0.112097	0.0210651	0.306619
12954	Q3TC46	194	T	Q3TC46	T194	Protein PAT1 homolog 1	Patl1	SPIIGSPPVRAVPIGTPPKQMAVPSFNQQIL	AVPIGT(1)PPK	AVPIGT(91.96)PPK	6	0.00572047	103.43	2	480.252	-0.021847	+	0.18831	0.129851	0.172637	3	0.163599	0.0302592	0.286849	0.108123	0.0501863	0.225213	3	0.127841	0.0891638	0.308935
6588	Q5U4H9;J3QND8;E9Q2H3;E9Q0D2	248;248;247;153	S	Q5U4H9	S248		Ncoa4;Gm6768	TSENSQTSARACSFFSDAWGNLKGLENWLLN	ACS(1)FFS(1)DAWGNLK	ACS(130.09)FFS(130.09)DAWGNLK	6	1.04517e-78	191.51	2	831.807	0.13969	+	0.00328816	0.0395727	0.0701725	3	0.0376778	0.0334824	0.980768	0.117908	0.108497	0.114441	3	0.113616	0.00475943	0.308935
6345	Q52KE7;Q52KE7-2	172;172	S	Q52KE7	S172	Cyclin-L1	Ccnl1	NVFHHLRQLRGKRTPSPLILDQNYINTKNQV	RT(0.221)PS(0.779)PLILDQNYINTK	RT(-5.48)PS(5.48)PLILDQNY(-59.87)INT(-73)K	4	0.000926708	79.317	3	651.666	0.62985	+		0.0148144	-0.0627699	2	-0.0239778	0.0548605	0.763349		0.411939	0.0807022	2	0.246321	0.23422	0.309018
11738	Q922J3;Q922J3-2;D3Z3M7;D3Z2Z1;F8WIA1;Q8C0S5;F6RCU2	286;286;286;286;286;286;39	T	Q922J3	T286	CAP-Gly domain-containing linker protein 1	Clip1	FAPVHKVTKIGFPSTTPAKAKAAAVRRVMAA	IGFPS(0.085)T(0.085)T(0.831)PAK	IGFPS(-9.92)T(-9.92)T(9.92)PAK	7	0.000302415	120.86	2	549.765	-0.16914	+	-0.268653	-0.238598		2	-0.253626	0.0212518	0.0900854	-0.0790365	-0.166604		2	-0.12282	0.0619198	0.31062
10758	Q9ERH4;Q9ERH4-2	246;213	S	Q9ERH4	S246	Nucleolar and spindle-associated protein 1	Nusap1	DKKGIVTPVPPRGRLSVPCTPARQQCPQGHS	GRLS(1)VPCTPAR	GRLS(48.4)VPCT(-48.4)PAR	4	0.00374331	93.228	3	431.876	-0.67638	+	-0.226265	-0.28951	-0.174903	3	-0.230226	0.0574065	0.093169	-0.0474306	-0.164728	-0.169086	3	-0.127082	0.0690142	0.31062
12943	Q149F1	490	T	Q149F1	T490	RNA pseudouridylate synthase domain-containing protein 2	Rpusd2	QKIDGIAEAAPQHLDTPEKAAKADVTQETDP	IDGIAEAAPQHLDT(1)PEK	IDGIAEAAPQHLDT(131.61)PEK	14	3.90312e-20	131.61	3	628.963	2.002	+	-0.310487	-0.259543	-0.141042	3	-0.237024	0.086938	0.0935555	-0.080987	-0.14462	-0.0873909	3	-0.104333	0.0350366	0.31062
10398	Q9D0M2	154	S	Q9D0M2	S154	Cell division cycle-associated protein 7	Cdca7	MSELESFPGLFSGRHSLPGHRAKDSKSPRRR	LMSELESFPGLFS(0.209)GRHS(0.791)LPGHR	LMS(-46.17)ELES(-36.86)FPGLFS(-5.79)GRHS(5.79)LPGHR	17	0.00478897	69.289	4	634.306	-0.87981	+	-0.267044	-0.130375	-0.331913	3	-0.243111	0.102878	0.104311	-0.182928	-0.0457478	-0.187521	3	-0.138732	0.0805595	0.31062
10938	Q9JKB3;Q9JKB3-2	328;259	S	Q9JKB3	S328	Y-box-binding protein 3	Ybx3	SARRGFRRPYNYRRRSRPLNAVSQDGKETKA	S(1)RPLNAVSQDGKETK	S(61.33)RPLNAVS(-61.33)QDGKET(-73.35)K	1	0.000137515	118.55	4	428.211	1.1671	+	-0.279138	-0.21061	-0.146872	3	-0.212207	0.0661476	0.107941	-0.0724337	-0.167881	-0.0831441	3	-0.10782	0.0522895	0.31062
5506	P97929	125	S	P97929	S125	Breast cancer type 2 susceptibility protein homolog	Brca2	HSKKKTKVDPVVDVASPPLKSCLSESPLTLR	TKVDPVVDVAS(1)PPLK	T(-95.79)KVDPVVDVAS(95.79)PPLK	11	6.47261e-05	121.82	3	548.958	1.1158	+	-0.212405	-0.146119	-0.208603	3	-0.189042	0.0372209	0.130364	-0.155458	-0.0868858	-0.078783	3	-0.107042	0.0421243	0.31062
10508	Q9D6Z1;A2APD7	465;181	S	Q9D6Z1	S465	Nucleolar protein 56	Nop56	EKKRLAALALASSENSSTPEECEEVNEKSKK	RLAALALAS(0.043)S(0.043)ENS(0.87)S(0.759)T(0.285)PEECEEVNEK	RLAALALAS(-14.84)S(-14.84)ENS(9.96)S(5.01)T(-5.01)PEECEEVNEK	13	4.93178e-06	107.39	3	965.41	-0.3086	+	-0.0597725	-0.256341	0.00401839	3	-0.104032	0.135705	0.466716	-0.0507663	-0.311322	-0.0899757	3	-0.150688	0.140488	0.31062
9177	Q8JZQ9	111	S	Q8JZQ9	S111	Eukaryotic translation initiation factor 3 subunit B	Eif3b	PGKAEAVGEQARGHPSAGAEEEGGSDGSAAE	GHPS(1)AGAEEEGGSDGSAAEAEPR	GHPS(79.37)AGAEEEGGS(-79.37)DGS(-109.01)AAEAEPR	4	1.97804e-190	216.9	3	749.964	-0.18118	+	0.281965	0.227887	0.356064	3	0.288638	0.0643487	0.108637	0.112355	0.0684456	0.164246	3	0.115015	0.0479556	0.311535
10064	Q99LM9	75	S	Q99LM9	S75	Transcriptional adapter 1	Tada1	NDFLLAILTRCQILVSTPEGAGSLPWTGGSA	CQILVS(0.807)T(0.193)PEGAGSLPWTGGSAAKPGKPK	CQILVS(6.22)T(-6.22)PEGAGS(-40.62)LPWT(-68.06)GGS(-68.06)AAKPGKPK	6	0.00120388	81.329	4	719.361	-1.0121	+		0.23621	0.167612	2	0.201911	0.0485055	0.233575		0.173099	0.0959394	2	0.134519	0.05456	0.311535
497	Q9QYR6;Q9QYR6-2;A2ARP8	895;1119;1133	S	Q9QYR6	S895	Microtubule-associated protein 1A;MAP1A heavy chain;MAP1 light chain LC2	Map1a	EATQGLDYVPSAGTISPTSSLEEDKGFKSPP	TEATQGLDYVPS(0.002)AGT(0.007)IS(0.941)PT(0.011)S(0.011)S(0.028)LEEDK	T(-67.4)EAT(-61.05)QGLDY(-55.69)VPS(-26.38)AGT(-21.57)IS(15.25)PT(-19.19)S(-19.19)S(-15.25)LEEDK	17	4.51028e-06	83.695	3	926.086	0.15829	+		0.0282865	0.047503	2	0.0378948	0.0135881	0.987178		0.0551489	0.211054	2	0.133102	0.110242	0.311535
1832	E9PVX6	287	S	E9PVX6	S287		Mki67	ARAKSSGSTPVTAASSPKVGKIWTERWRGGM	SSGSTPVTAAS(0.005)S(0.995)PK	S(-139.53)S(-125.45)GS(-113.16)T(-108.24)PVT(-91.08)AAS(-23.34)S(23.34)PK	12	2.60597e-55	188.16	2	678.806	1.2125	+	-0.178853	-0.22956	-0.157608	3	-0.188674	0.0369679	0.128986	-0.0842187	-0.142993	-0.0822107	3	-0.103141	0.0345278	0.31271
13431	Q6ZQF0	1089	T	Q6ZQF0	T1089	DNA topoisomerase 2-binding protein 1	Topbp1	QKQLQEIMSATCIVKTPAQKTCMSRSSCNSA	QLQEIMSATCIVKT(1)PAQK	QLQEIMS(-62.59)AT(-36.01)CIVKT(36.01)PAQK	14	0.000105659	97.2	4	532.265	-0.32794	+	-0.426977	-0.304194	-0.252805	3	-0.327992	0.0894919	0.0537856	-0.231852	-0.0430924	-0.165867	3	-0.146937	0.0957929	0.312984
206	Q8K4Q0;A2ACM0;Q8K4Q0-2	721;721;536	S	Q8K4Q0	S721	Regulatory-associated protein of mTOR	Rptor	TPVRDSPCTPRLRSVSSYGNIRAVTTARNLN	LRSVS(0.769)S(0.231)YGNIR	LRS(-53.32)VS(5.22)S(-5.22)Y(-75.76)GNIR	5	0.000131763	123.95	2	666.327	-1.1823	+	-0.107093	-0.0795792	-0.0192825	3	-0.0686517	0.0449137	0.466716	-0.10476	-0.0769893	-0.14619	3	-0.109313	0.0348244	0.312999
13084	Q3UYV9	27	T	Q3UYV9	T27	Nuclear cap-binding protein subunit 1	Ncbp1	GGQPHKRRKTSDANETEDHLESLICKVGEKS	RKT(0.017)S(0.043)DANET(0.939)EDHLESLICK	RKT(-17.42)S(-13.36)DANET(13.36)EDHLES(-33)LICK	9	4.90313e-59	178.45	3	776.018	1.2194	+	0.726963	0.63725	0.56508	3	0.643098	0.0811	0.0119814	0.111714	0.0376257	0.284716	3	0.144685	0.126802	0.314578
2401	E9Q6E5;Q3UIX4;B7ZNC5;Q8BV04	235;200;147;147	S	E9Q6E5	S235		Srsf11	STVDPKLNHVAAGLVSPSLKSDTSSKEIEEA	LNHVAAGLVS(1)PSLK	LNHVAAGLVS(51.14)PS(-51.14)LK	10	3.9775e-133	215.64	2	743.395	-2.8195	+	0.243683	0.258134	0.319157	3	0.273658	0.0400603	0.114766	0.0531794	0.100405	0.228258	3	0.127281	0.0905808	0.314578
14248	Q9EQC5	332	T	Q9EQC5	T332	N-terminal kinase-like protein	Scyl1	LLTAFEFGNAGAVVLTPLFKVGKSLRAEEYQ	VLPQLLTAFEFGNAGAVVLT(1)PLFK	VLPQLLT(-79.36)AFEFGNAGAVVLT(79.36)PLFK	20	3.70222e-11	92.01	3	875.808	2.4293	+		0.272932	0.206265	2	0.239599	0.0471402	0.167586		0.159387	0.0992397	2	0.129313	0.0425303	0.314578
5779	Q80U58;Q80U58-2;Q80U58-3;Q3TQ29;Q3UR91;E9PW51;E9Q765;E9Q4Q6	102;102;46;102;102;102;102;102	S	Q80U58	S102	Pumilio homolog 2	Pum2	SGGLGVSMVEYVLSSSPADKLDSRFRKGTFG	SESGGLGVSMVEYVLS(0.009)S(0.053)S(0.937)PADKLDSR	S(-124.44)ES(-119.45)GGLGVS(-98.69)MVEY(-55.23)VLS(-20.23)S(-12.44)S(12.44)PADKLDS(-36.21)R	18	4.12961e-37	158.33	4	688.32	-0.26366	+	0.170379	0.1478	0.301265	3	0.206481	0.0828575	0.202636	0.111416	0.066773	0.164957	3	0.114382	0.0491589	0.314578
10177	Q9CPY3	32	S	Q9CPY3	S32	Sororin	Cdca5	PRTSLTKPSKSSKRKSGSDLPNSFSEIWPRT	RKS(0.998)GS(0.002)DLPNSFSEIWPR	RKS(27.81)GS(-27.81)DLPNS(-76.79)FS(-84.82)EIWPR	3	0.00030382	112.67	3	685.993	-0.83363	+	-0.298579	-0.233892	-0.203957	3	-0.245476	0.0483628	0.084064	-0.0634835	-0.116435	-0.176207	3	-0.118709	0.0563962	0.315096
1017	Q8BTM8;B7FAU9;B7FAV1	2180;2172;2116	S	Q8BTM8	S2180	Filamin-A	Flna	KIPEISIQDMTAQVTSPSGKTHEAEIVEGEN	IPEISIQDMTAQVT(0.004)S(0.99)PS(0.006)GK	IPEIS(-90.03)IQDMT(-75.14)AQVT(-23.98)S(22.2)PS(-22.2)GK	15	8.828e-08	115.57	3	694.666	-1.5478	+	-0.0563126	0.10704	0.0108751	3	0.0205343	0.0821037	0.928117	0.0453861	0.0927557	0.330321	3	0.156154	0.152681	0.31564
4025	O08750	301	S	O08750	S301	Nuclear factor interleukin-3-regulated protein	Nfil3	SDGEDEQQVPKGPIHSPVELQRVHATVVKVP	GPIHS(1)PVELQR	GPIHS(77.19)PVELQR	5	0.000455771	106.76	3	438.218	0.98621	+	0.213677	0.151094	0.221104	3	0.195292	0.038456	0.216329	0.0838567	0.0622811	0.223379	3	0.123172	0.0874494	0.315763
1157	D3Z194;D3YTT6;Q9DBS9;F8WH20	728;764;733;697	S	D3Z194;Q9DBS9	S728	Oxysterol-binding protein;Oxysterol-binding protein-related protein 3	Osbpl3	LFGKWHESIYCGGASSSTCVWRANPMPKGYE	WHESIYCGGAS(0.006)S(0.932)S(0.051)T(0.011)CVWR	WHES(-117.87)IY(-106.49)CGGAS(-21.71)S(12.63)S(-12.63)T(-19.44)CVWR	12	2.83599e-21	136.46	3	741.631	-1.9444	+	-0.106849	0.285265	0.471791	3	0.216735	0.295344	0.643517	0.0328313	0.114277	0.480421	3	0.209177	0.238409	0.315763
10536	Q9D842;Q9D842-2;Q9D842-3	131;23;110	S	Q9D842	S131	Aprataxin and PNK-like factor	Aplf	SQMLDEDDILSEMQKSPVVNLPDKTTGASQL	NSQMLDEDDILS(0.003)EMQKS(0.997)PVVNLPDK	NS(-66.28)QMLDEDDILS(-25.44)EMQKS(25.44)PVVNLPDK	17	0.000295902	69.398	4	732.087	-0.57709	+	-0.0397243	0.103598	0.220266	3	0.0947136	0.130223	0.81114	0.08019	0.0875685	0.172263	3	0.11334	0.0511613	0.315763
427	Q91VX2;A2AMY5;F6PYV5	114;113;122	S	Q91VX2	S114	Ubiquitin-associated protein 2	Ubap2	WETVGGKKKNFGRESSENKENREKRTEREAS	NFGRES(0.005)S(0.995)ENK	NFGRES(-22.75)S(22.75)ENK	7	0.00313726	95.428	2	624.256	0.86553	+	-0.111972	0.02506	0.046163	3	-0.0135831	0.0858583	0.842377	0.0428862	0.233123	0.163543	3	0.146517	0.0962545	0.315763
7003	Q62318;Q62318-2	473;473	S	Q62318	S473	Transcription intermediary factor 1-beta	Trim28	YSSAEPHVSGMKRSRSGEGEVSGLLRKVPRV	S(1)GEGEVSGLLRK	S(78.59)GEGEVS(-78.59)GLLRK	1	1.20556e-05	139.3	3	437.882	1.1913	+	0.309396	0.23096	0.282446	3	0.274267	0.0398527	0.119257	0.128608	0.110186	0.104191	3	0.114328	0.0127248	0.316152
6179	Q3UZ39;Q3UZ39-3	302;63	S	Q3UZ39	S302	Leucine-rich repeat flightless-interacting protein 1	Lrrfip1	GEKAENQRPAEDSALSPGPLAGAKCEQQVQS	AENQRPAEDSALS(1)PGPLAGAK	AENQRPAEDS(-64.1)ALS(64.1)PGPLAGAK	13	1.12106e-105	212.76	3	720.342	-0.81239	+	0.187408	0.278182	0.253039	3	0.239543	0.0468677	0.148759	0.0940908	0.069335	0.180015	3	0.11448	0.0580891	0.316152
4805	P40201;Q8C7Q2	90;90	S	P40201	S90	Chromodomain-helicase-DNA-binding protein 1	Chd1	QAKPPKVDGAEFWKSSPSILAVQRSAMLRKQ	S(0.028)S(0.971)PSILAVQR	S(-15.33)S(15.33)PS(-34.28)ILAVQR	2	0.00255083	90.861	2	569.287	0.604	+	-0.353792	-0.286526	-0.341751	3	-0.327357	0.035869	0.0537856	-0.165304	-0.231355	-0.0189916	3	-0.13855	0.10868	0.316766
13662	Q8BVY0	399	T	Q8BVY0	T399		Rsl1d1	STPKGKKRKALLATETPEASAPGTSGKKQKK	ALLAT(0.001)ET(0.999)PEASAPGTSGK	ALLAT(-32.1)ET(32.1)PEAS(-57.4)APGT(-109.04)S(-113.75)GK	7	4.66988e-232	245.12	2	890.922	-1.3781	+	-0.385979	-0.252511	-0.377343	3	-0.338611	0.0746898	0.0537856	-0.0580842	-0.109775	-0.25244	3	-0.1401	0.100664	0.316766
11560	Q923A8;A2AP92	415;415	T	Q923A8	T415		Map3k7	VATAAYSKPKRGHRKTASFGNILDVPEIVIS	T(0.853)AS(0.147)FGNILDVPEIVISGNGQPR	T(7.64)AS(-7.64)FGNILDVPEIVIS(-126.97)GNGQPR	1	8.62429e-126	203.74	3	788.725	0.94813	+	-0.210384	-0.198507	-0.270772	3	-0.226554	0.0387513	0.102097	-0.0599041	-0.136784	-0.143514	3	-0.113401	0.0464517	0.316766
6740	Q61081	121	S	Q61081	S121	Hsp90 co-chaperone Cdc37;Hsp90 co-chaperone Cdc37, N-terminally processed	Cdc37	MRKKEKNMPWNVDTLSKDGFSKSMVNTKPEK	NMPWNVDTLS(1)K	NMPWNVDT(-34.1)LS(34.1)K	10	9.76952e-12	150.37	3	462.204	0.23435	+	-0.186926	-0.211358	-0.244054	3	-0.214113	0.0286635	0.108738	-0.103359	-0.0827204	-0.126066	3	-0.104049	0.0216813	0.316766
10333	Q9CYC5	344	S	Q9CYC5	S344	Kinetochore-associated protein DSN1 homolog	Dsn1	DSSPARKLLKLPLQSSPSTQ___________	LPLQS(0.064)S(0.922)PS(0.014)TQ	LPLQS(-11.56)S(11.56)PS(-18.32)T(-41.46)Q	6	0.000769236	105.65	2	569.263	-0.8311	+	-0.274611	-0.203342	-0.145818	3	-0.207924	0.0645188	0.113098	-0.109579	-0.0971164	-0.0926505	3	-0.0997818	0.00877316	0.316766
9666	Q8VEK3;G3XA10	58;58	S	Q8VEK3	S58	Heterogeneous nuclear ribonucleoprotein U	Hnrnpu	DNEAGGRPAMEPGNGSLDLGGDAAGRSGAGL	LQAALDNEAGGRPAMEPGNGS(1)LDLGGDAAGR	LQAALDNEAGGRPAMEPGNGS(76.8)LDLGGDAAGR	21	0.00110621	76.804	3	1020.8	-0.051284	+	0.0913504	-0.139866	-0.154698	3	-0.0677377	0.137974	0.692614	-0.0560659	-0.181596	-0.106735	3	-0.114799	0.0631523	0.316766
6418	Q68FF6;Q5F258	579;570	S	Q68FF6	S579	ARF GTPase-activating protein GIT1	Git1	RIRKGVSASSVPFTPSSPLLSCSQEGSRHAS	GVSASSVPFT(0.001)PS(0.826)S(0.152)PLLS(0.011)CS(0.004)QEGS(0.007)R	GVS(-104.74)AS(-100.24)S(-95.4)VPFT(-30.37)PS(7.35)S(-7.35)PLLS(-18.78)CS(-22.7)QEGS(-21.04)R	12	1.94127e-100	184.94	2	1259.07	-0.87284	+	0.230347	0.241098	-0.104146	3	0.122433	0.196296	0.742194	0.122036	0.234441	0.074755	3	0.143744	0.0820266	0.317869
4860	P46460;G3UX86	207;172	S	P46460	S207	Vesicle-fusing ATPase	Nsf	SLNLIGKAKTKENRQSIINPDWNFEKMGIGG	ENRQS(1)IINPDWNFEK	ENRQS(74.66)IINPDWNFEK	5	8.99954e-27	167.95	2	985.444	-0.68884	+	0.161877	0.141418	0.116605	3	0.139967	0.0226706	0.352967	0.108764	0.113709	0.11276	3	0.111744	0.00262459	0.318064
12457	O08553	514	T	O08553	T514	Dihydropyrimidinase-related protein 2	Dpysl2	YDGPVCEVSVTPKTVTPASSAKTSPAKQQAP	T(0.061)VT(0.937)PAS(0.002)S(0.003)AKT(0.839)S(0.158)PAK	T(-11.94)VT(11.94)PAS(-28.06)S(-28.03)AKT(7.26)S(-7.26)PAK	3	0.00852606	115.74	2	753.336	1.1762	+	-0.246923	-0.224491	-0.203251	3	-0.224888	0.0218388	0.0945548	-0.11684	-0.0759431	-0.118595	3	-0.103793	0.0241346	0.318109
8125	Q80YR7	1292	S	Q80YR7	S1292	Claspin	Clspn	KPQVRRRGLSSMMSPSPKRLKTNGSSPGPKR	GLSSMMSPS(1)PK	GLS(-97.52)S(-82.42)MMS(-46.18)PS(46.18)PK	9	2.35697e-38	183.81	2	601.253	-0.64383	+	-0.153242	-0.187561		2	-0.170402	0.0242671	0.174488	-0.148819	-0.0880491		2	-0.118434	0.0429704	0.318109
577	A2AWT3-2	170	S	A2AWT3-2	S170	Ataxin-7-like protein 3	Atxn7l3	RKSDKLWYLPFQNPNSPRRSKSLKHKNGELS	LWYLPFQNPNS(1)PR	LWY(-91.43)LPFQNPNS(91.43)PR	11	3.82104e-18	149.19	2	856.403	2.3046	+	-0.110278	-0.103143	-0.188844	3	-0.134089	0.0475538	0.233047	-0.144013	-0.0700347	-0.107651	3	-0.107233	0.0369911	0.318392
9395	Q8R0A2;Q8R0A2-2	194;194	S	Q8R0A2	S194	Zinc finger and BTB domain-containing protein 44	Zbtb44	ESRRKRKSYIVMSPESPVKCSTQTSSPQVLN	SYIVMSPES(1)PVK	S(-107.82)Y(-113.92)IVMS(-69.27)PES(69.27)PVK	9	1.32117e-05	127.36	3	472.888	1.3813	+	-0.160352	-0.10839	-0.0689276	3	-0.112557	0.0458545	0.280002	-0.140759	-0.0941664	-0.0706658	3	-0.101864	0.0356752	0.318416
[truncated: 13,376 more rows]
